# Supplementary material
Source: Preprints.org preprint supplement (doi:10.20944/preprints202107.0372.v1)
Supplement: Supplementary file 1 [file Supplemental Table S1.xlsx]

## Sheet: Sheet1
Supplemental Table S1
Basic profiles of proteomics data.
Checked	Master	Accession	Description	Coverage	# Peptides	# PSMs	# Unique Peptides	# Protein Groups	# AAs	MW [kDa]	calc. pI	# Razor Peptides	Protein FDR Confidence Sequest HT	Exp. q-value Sequest HT	Score Sequest HT	# Peptides Sequest HT
FALSE	Master Protein	ATCG00490.1	ribulose-bisphosphate carboxylases	70.5637	48	5165	45	1	479	52.9	6.29	4	High	0	19519.4	48
FALSE	Master Protein	AT2G39730.1	rubisco activase	76.1603	31	2066	2	1	474	51.9	6.15	49	High	0	8290.2	31
FALSE	Master Protein	AT2G39730.2	rubisco activase	74.6637	30	2040	1	1	446	49.1	7.68	0	High	0	8143.35	30
FALSE	Master Protein	ATCG00480.1	ATP synthase subunit beta	77.1084	31	1325	30	1	498	53.9	5.5	1	High	0	5404.86	31
FALSE	Master Protein	AT1G55490.1	chaperonin 60 beta	69.8333	46	794	13	1	600	63.8	6.51	35	High	0	3166.4	46
FALSE	Master Protein	AT4G24280.1	chloroplast heat shock protein 70-1	60.3064	46	706	18	1	718	76.5	5.2	30	High	0	3096.5	46
FALSE	Master Protein	AT5G66570.1	PS II oxygen-evolving complex 1	65.0602	24	768	10	1	332	35.1	5.66	0	High	0	3037.06	24
FALSE	Master Protein	AT3G13470.1	TCP-1/cpn60 chaperonin family protein	67.1141	44	755	13	1	596	63.3	5.73	0	High	0	3029.02	44
FALSE	Master Protein	AT4G33010.1	glycine decarboxylase P-protein 1	60.5593	48	707	28	1	1037	112.9	6.98	32	High	0	3002.28	48
FALSE	Master Protein	AT3G50820.1	photosystem II subunit O-2	64.0483	24	758	10	1	331	35	6.16	14	High	0	2926.38	24
FALSE	Master Protein	AT1G06680.1	photosystem II subunit P-1	60.8365	17	652	17	1	263	28.1	7.39	0	High	0	2918.51	17
FALSE	Master Protein	AT3G12780.1	phosphoglycerate kinase 1	73.1809	32	682	15	1	481	50.1	6.24	1	High	0	2876.61	32
FALSE	Master Protein	AT1G42970.1	glyceraldehyde-3-phosphate dehydrogenase B subunit	70.0224	31	746	27	1	447	47.6	6.8	5	High	0	2844.36	31
FALSE	Master Protein	AT5G49910.1	chloroplast heat shock protein 70-2	60.8635	44	650	15	1	718	77	5.3	1	High	0	2810.5	44
FALSE	Master Protein	AT5G04140.1	glutamate synthase 1	58.508	72	683	62	1	1622	176.6	6.32	11	High	0	2788.4	72
FALSE	Master Protein	ATCG00120.1	ATP synthase subunit alpha	53.4517	24	669	22	1	507	55.3	5.25	2	High	0	2710.98	24
FALSE	Master Protein	AT1G13440.1	glyceraldehyde-3-phosphate dehydrogenase C2	83.1361	26	654	3	1	338	36.9	7.18	28	High	0	2706.14	26
FALSE	Master Protein	AT3G26650.1	glyceraldehyde 3-phosphate dehydrogenase A subunit	73.2323	24	685	9	1	396	42.5	7.75	11	High	0	2674.3	24
FALSE	Master Protein	AT3G04120.1	glyceraldehyde-3-phosphate dehydrogenase C subunit 1	83.1361	25	637	2	1	338	36.9	7.12	0	High	0	2618.55	25
FALSE	Master Protein	AT5G02500.1	heat shock cognate protein 70-1	64.8233	47	657	11	1	651	71.3	5.12	42	High	0	2587.29	47
FALSE	Master Protein	AT1G23310.1	glutamate:glyoxylate aminotransferase	78.5863	33	640	17	1	481	53.3	6.89	19	High	0	2512.35	33
FALSE	Master Protein	AT1G12900.1	glyceraldehyde 3-phosphate dehydrogenase A subunit 2	55.1378	20	622	5	1	399	42.8	8.05	0	High	0	2446.33	20
FALSE	Master Protein	AT4G38970.1	fructose-bisphosphate aldolase 2	60.5528	21	590	11	1	398	43	7.24	12	High	0	2416.98	21
FALSE	Master Protein	AT1G07940.1	GTP binding Elongation factor Tu family protein	63.2517	28	616	28	1	449	49.5	9.11	0	High	0	2390.8	28
FALSE	Master Protein	AT2G26080.1	glycine decarboxylase P-protein 2	57.1839	43	553	23	1	1044	113.7	6.65	0	High	0	2298.65	43
FALSE	Master Protein	AT5G40450.1	unknown protein; FUNCTIONS IN: molecular_function unknown; INVOLVED IN: biological_process unknown; LOCATED IN: chloroplast, plasma membrane; EXPRESSED IN: 24 plant structures; EXPRESSED DURING: 13 growth stages; Has 30201 Blast hits to 17322 proteins in 780 species: Archae - 12; Bacteria - 1396; Metazoa - 17338; Fungi - 3422; Plants - 5037; Viruses - 0; Other Eukaryotes - 2996 (source: NCBI BLin…	69.6781	174	539	174	1	2889	322.8	4.3	0	High	0	2158.65	174
FALSE	Master Protein	AT3G01500.2	carbonic anhydrase 1	57.3487	19	535	10	1	347	37.4	5.99	0	High	0	2112.82	19
FALSE	Master Protein	AT1G67090.1	ribulose bisphosphate carboxylase small chain 1A	76.6667	16	551	8	1	180	20.2	7.71	0	High	0	2107.43	16
FALSE	Master Protein	AT3G60750.1	Transketolase	56.4103	30	518	23	1	741	79.9	6.37	7	High	0	2091.48	30
FALSE	Master Protein	AT5G08680.1	ATP synthase alpha/beta family protein	65.1163	28	501	27	1	559	59.8	6.49	0	High	0	2065	28
FALSE	Master Protein	AT5G38420.1	Ribulose bisphosphate carboxylase (small chain) family protein	75.6906	17	562	4	1	181	20.3	7.71	14	High	0	2063.96	17
FALSE	Master Protein	AT2G36530.1	Enolase	79.5045	29	455	29	1	444	47.7	5.77	0	High	0	2029.54	29
FALSE	Master Protein	AT1G56070.1	Ribosomal protein S5/Elongation factor G/III/V family protein	69.395	54	495	35	1	843	93.8	6.25	23	High	0	1958.96	54
FALSE	Master Protein	AT5G14740.1	carbonic anhydrase 2	62.5378	21	476	12	1	331	36.6	7.4	11	High	0	1939.36	21
FALSE	Master Protein	AT4G37930.1	serine transhydroxymethyltransferase 1	65.9574	30	479	20	1	517	57.4	8.13	14	High	0	1889.94	30
FALSE	Master Protein	AT3G09440.1	Heat shock protein 70 (Hsp 70) family protein	61.4792	43	480	12	1	649	71.1	5.07	1	High	0	1874.65	43
FALSE	Master Protein	ATCG00680.1	photosystem II reaction center protein B	32.6772	16	416	16	1	508	56	6.89	0	High	0	1845.62	16
FALSE	Master Protein	AT1G56190.1	Phosphoglycerate kinase family protein	73.0126	32	424	14	1	478	49.9	8.27	19	High	0	1798.42	32
FALSE	Master Protein	AT3G17390.1	S-adenosylmethionine synthetase family protein	78.3715	23	422	11	1	393	42.8	5.81	14	High	0	1788.51	23
FALSE	Master Protein	AT3G15950.1	DNA topoisomerase-related	74.2228	75	442	74	1	772	85	4.69	1	High	0	1765.43	75
FALSE	Master Protein	AT2G21330.1	fructose-bisphosphate aldolase 1	53.6341	19	443	8	1	399	42.9	6.58	0	High	0	1750.43	19
FALSE	Master Protein	AT5G56500.2	TCP-1/cpn60 chaperonin family protein	66.1642	38	433	20	1	597	63.3	5.87	0	High	0	1729.25	38
FALSE	Master Protein	AT3G09260.1	Glycosyl hydrolase superfamily protein	54.771	20	391	15	1	524	59.7	6.92	1	High	0	1676.62	20
FALSE	Master Protein	AT5G35630.3	glutamine synthetase 2	52.093	21	412	19	1	430	47.4	6.87	2	High	0	1667.64	21
FALSE	Master Protein	AT5G38430.1	Ribulose bisphosphate carboxylase (small chain) family protein	75.6906	17	455	4	1	181	20.3	7.71	0	High	0	1659.48	17
FALSE	Master Protein	AT3G16420.2	PYK10-binding protein 1	71.4765	19	391	14	1	298	32.1	5.77	6	High	0	1649.58	19
FALSE	Master Protein	AT3G55800.1	sedoheptulose-bisphosphatase	50.3817	16	385	16	1	393	42.4	6.57	0	High	0	1614.43	16
FALSE	Master Protein	AT5G17920.1	Cobalamin-independent synthase family protein	58.6928	42	404	22	1	765	84.3	6.51	23	High	0	1604.18	42
FALSE	Master Protein	AT2G28000.1	chaperonin-60alpha	64.1638	31	392	30	1	586	62	5.19	0	High	0	1602.22	31
FALSE	Master Protein	AT4G29060.1	elongation factor Ts family protein	58.1322	61	395	61	1	953	103.7	5.01	0	High	0	1593.25	61
FALSE	Master Protein	AT2G30950.1	FtsH extracellular protease family	65.036	37	387	20	1	695	74.1	6.35	21	High	0	1559.65	37
FALSE	Master Protein	AT5G42020.1	Heat shock protein 70 (Hsp 70) family protein	66.7665	48	405	5	1	668	73.5	5.21	47	High	0	1559.29	48
FALSE	Master Protein	AT1G70580.1	alanine-2-oxoglutarate aminotransferase 2	76.5073	30	384	14	1	481	53.4	6.58	0	High	0	1529.67	30
FALSE	Master Protein	AT1G11860.1	Glycine cleavage T-protein family	58.3333	25	374	25	1	408	44.4	8.37	0	High	0	1519.65	25
FALSE	Master Protein	AT5G50920.1	CLPC homologue 1	59.5264	61	384	23	1	929	103.4	6.77	42	High	0	1519.58	61
FALSE	Master Protein	AT5G28540.1	heat shock protein 70 (Hsp 70) family protein	66.8161	48	381	5	1	669	73.6	5.17	0	High	0	1504.07	48
FALSE	Master Protein	AT3G16460.2	Mannose-binding lectin superfamily protein	46.383	25	327	25	1	705	72.4	5.5	0	High	0	1492.63	25
FALSE	Master Protein	AT1G79550.2	phosphoglycerate kinase	79.5511	26	351	21	1	401	42.1	5.68	0	High	0	1489.5	26
FALSE	Master Protein	AT4G20360.1	RAB GTPase homolog E1B	56.0924	23	356	21	1	476	51.6	6.19	0	High	0	1469.06	23
FALSE	Master Protein	AT5G56030.1	heat shock protein 81-2	53.9342	50	384	2	1	699	80	5.05	0	High	0	1465.47	50
FALSE	Master Protein	AT1G32060.1	phosphoribulokinase	63.7975	18	340	18	1	395	44.4	6.05	0	High	0	1458.3	18
FALSE	Master Protein	AT5G56010.1	heat shock protein 81-3	55.2217	51	383	1	1	699	80	5.05	59	High	0	1456.89	51
FALSE	Master Protein	AT5G53460.1	NADH-dependent glutamate synthase 1	52.8533	99	360	99	1	2208	241.7	6.37	0	High	0	1443.27	99
FALSE	Master Protein	AT1G54010.1	GDSL-like Lipase/Acylhydrolase superfamily protein	55.1813	18	349	14	1	386	43.1	8.07	4	High	0	1420.17	18
FALSE	Master Protein	AT5G02490.1	Heat shock protein 70 (Hsp 70) family protein	62.9403	39	362	11	1	653	71.3	5.12	1	High	0	1412.81	39
FALSE	Master Protein	AT1G48030.2	mitochondrial lipoamide dehydrogenase 1	62.7219	28	341	15	1	507	54	7.4	0	High	0	1405.8	28
FALSE	Master Protein	AT4G28520.1	cruciferin 3	73.4733	24	318	24	1	524	58.2	6.99	0	High	0	1397.94	24
FALSE	Master Protein	AT5G62700.1	tubulin beta chain 3	72.6667	25	368	5	1	450	50.7	4.81	29	High	0	1375.7	25
FALSE	Master Protein	AT4G02770.1	photosystem I subunit D-1	67.7885	15	360	2	1	208	22.6	9.77	15	High	0	1354.31	15
FALSE	Master Protein	AT3G52930.1	Aldolase superfamily protein	78.7709	24	311	15	1	358	38.5	6.46	10	High	0	1350.46	24
FALSE	Master Protein	AT3G14420.1	Aldolase-type TIM barrel family protein	75.2044	23	333	5	1	367	40.3	9.13	2	High	0	1344.77	23
FALSE	Master Protein	AT1G04820.1	tubulin alpha-4 chain	71.7778	25	339	1	1	450	49.5	5.06	29	High	0	1340.59	25
FALSE	Master Protein	AT1G78900.1	vacuolar ATP synthase subunit A	69.9839	41	337	41	1	623	68.8	5.24	0	High	0	1333.88	41
FALSE	Master Protein	AT3G14415.1	Aldolase-type TIM barrel family protein	77.6567	25	324	9	1	367	40.3	8.97	22	High	0	1319.49	25
FALSE	Master Protein	AT2G36880.1	methionine adenosyltransferase 3	83.3333	23	308	13	1	390	42.5	6.18	3	High	0	1317.64	23
FALSE	Master Protein	AT4G14960.2	Tubulin/FtsZ family protein	71.7778	25	330	1	1	450	49.5	5.06	0	High	0	1312.89	25
FALSE	Master Protein	AT3G48870.1	Clp ATPase	59.8739	55	324	17	1	952	105.7	6.42	0	High	0	1283.42	55
FALSE	Master Protein	AT1G03130.1	photosystem I subunit D-2	66.1765	14	347	1	1	204	22.3	9.77	0	High	0	1282.88	14
FALSE	Master Protein	AT2G37220.1	RNA-binding (RRM/RBD/RNP motifs) family protein	51.9031	11	281	7	1	289	30.7	5.16	0	High	0	1282.21	11
FALSE	Master Protein	AT5G56000.1	HEAT SHOCK PROTEIN 81.4	51.3591	44	331	7	1	699	80.1	5.05	1	High	0	1272.14	44
FALSE	Master Protein	AT3G46780.1	plastid transcriptionally active 16	68.6275	39	309	39	1	510	54.3	8.91	0	High	0	1270.23	39
FALSE	Master Protein	ATCG00020.1	photosystem II reaction center protein A	31.728	10	299	10	1	353	38.9	5.25	0	High	0	1258.59	10
FALSE	Master Protein	AT2G04030.1	Chaperone protein htpG family protein	61.5385	49	301	44	1	780	88.6	5.01	5	High	0	1251.33	49
FALSE	Master Protein	AT3G09840.1	cell division cycle 48	72.5587	53	296	12	1	809	89.3	5.25	46	High	0	1250.87	53
FALSE	Master Protein	AT3G12580.1	heat shock protein 70	63.5385	42	319	15	1	650	71.1	5.25	3	High	0	1240.59	42
FALSE	Master Protein	AT5G44340.1	tubulin beta chain 4	71.3964	22	315	5	1	444	49.8	4.86	0	High	0	1234.41	22
FALSE	Master Protein	ATCG00540.1	photosynthetic electron transfer A	60.625	20	312	20	1	320	35.3	8.29	0	High	0	1233.31	20
FALSE	Master Protein	AT4G02510.1	translocon at the outer envelope membrane of chloroplasts 159	53.0938	70	293	70	1	1503	160.7	4.55	0	High	0	1222.14	70
FALSE	Master Protein	AT5G42270.1	FtsH extracellular protease family	55.3977	33	267	9	1	704	75.2	5.49	30	High	0	1198.39	33
FALSE	Master Protein	AT3G19170.1	presequence protease 1	62.2222	64	309	49	1	1080	120.9	5.68	17	High	0	1187.55	64
FALSE	Master Protein	AT1G79920.1	Heat shock protein 70 (Hsp 70) family protein	65.2226	49	313	11	1	831	91.6	5.19	0	High	0	1185.41	49
FALSE	Master Protein	AT1G02500.2	S-adenosylmethionine synthetase 1	73.028	21	286	5	1	393	43.1	5.82	0	High	0	1184.63	21
FALSE	Master Protein	ATCG00280.1	photosystem II reaction center protein C	32.3467	13	294	13	1	473	51.8	7.2	0	High	0	1167.66	13
FALSE	Master Protein	AT4G20890.1	tubulin beta-9 chain	72.2973	23	294	4	1	444	49.6	4.78	4	High	0	1163.22	23
FALSE	Master Protein	AT2G47110.2	ubiquitin 6	64.9682	12	333	5	1	157	17.8	9.8	8	High	0	1160.55	12
FALSE	Master Protein	AT2G29550.1	tubulin beta-7 chain	64.588	23	304	3	1	449	50.7	4.83	0	High	0	1145.15	23
FALSE	Master Protein	AT4G13940.1	S-adenosyl-L-homocysteine hydrolase	62.6804	27	289	9	1	485	53.3	5.97	24	High	0	1142.83	27
FALSE	Master Protein	AT4G01850.1	S-adenosylmethionine synthetase 2	76.5903	22	272	7	1	393	43.2	6.06	5	High	0	1140.32	22
FALSE	Master Protein	AT5G23120.1	photosystem II stability/assembly factor, chloroplast (HCF136)	60.794	22	271	22	1	403	44.1	7.34	0	High	0	1137.69	22
FALSE	Master Protein	AT5G23860.2	tubulin beta 8	72.8285	25	299	3	1	449	50.6	4.83	4	High	0	1135.65	25
FALSE	Master Protein	AT1G06430.1	FTSH protease 8	51.8248	28	287	10	1	685	73.2	5.95	1	High	0	1130.36	28
FALSE	Master Protein	AT5G19770.1	tubulin alpha-3	60.6667	22	292	6	1	450	49.6	5.1	3	High	0	1125.93	22
FALSE	Master Protein	AT2G05710.1	aconitase 3	50.202	42	298	30	1	990	108.1	7.17	16	High	0	1120.77	42
FALSE	Master Protein	AT1G79930.1	heat shock protein 91	66.787	50	292	12	1	831	91.7	5.25	45	High	0	1101.45	50
FALSE	Master Protein	ATCG00340.1	Photosystem I, PsaA/PsaB protein	19.346	11	275	11	1	734	82.4	7.4	0	High	0	1096.87	11
FALSE	Master Protein	AT1G65930.1	cytosolic NADP+-dependent isocitrate dehydrogenase	80.4878	33	298	25	1	410	45.7	6.57	8	High	0	1093.63	33
FALSE	Master Protein	AT4G30190.1	H(+)-ATPase 2	48.4177	45	271	10	1	948	104.3	6.99	43	High	0	1069.73	45
FALSE	Master Protein	AT1G21750.1	PDI-like 1-1	69.8603	39	277	33	1	501	55.6	4.92	6	High	0	1066.04	39
FALSE	Master Protein	AT3G03780.3	methionine synthase 2	47.451	36	263	17	1	765	84.5	6.51	1	High	0	1055.64	36
FALSE	Master Protein	AT2G18960.1	H(+)-ATPase 1	49.5258	45	261	13	1	949	104.2	6.7	0	High	0	1035.09	45
FALSE	Master Protein	AT5G03340.1	ATPase, AAA-type, CDC48 protein	64.0741	46	248	3	1	810	89.9	5.2	3	High	0	1016.34	46
FALSE	Master Protein	AT3G63140.1	chloroplast stem-loop binding protein of 41 kDa	67.4877	25	259	23	1	406	43.9	8.43	1	High	0	1010.51	25
FALSE	Master Protein	AT1G49240.1	actin 8	61.2732	20	262	9	1	377	41.8	5.58	2	High	0	1004.34	20
FALSE	Master Protein	AT4G35830.1	aconitase 1	45.7684	36	270	24	1	898	98.1	6.4	0	High	0	1003.64	36
FALSE	Master Protein	AT3G17240.1	lipoamide dehydrogenase 2	64.2998	29	252	16	1	507	54	7.03	15	High	0	1000.4	29
FALSE	Master Protein	ATCG00270.1	photosystem II reaction center protein D	24.3626	7	230	7	1	353	39.5	5.74	0	High	0	998.14	7
FALSE	Master Protein	AT4G37910.1	mitochondrial heat shock protein 70-1	58.3578	38	258	29	1	682	73	5.62	7	High	0	997.02	38
FALSE	Master Protein	AT4G28080.1	Tetratricopeptide repeat (TPR)-like superfamily protein	51.6767	84	256	74	1	1819	199	6.16	12	High	0	988.06	84
FALSE	Master Protein	AT4G24770.1	31-kDa RNA binding protein	30.0912	7	236	7	1	329	35.8	4.65	0	High	0	986.13	7
FALSE	Master Protein	AT3G09820.1	adenosine kinase 1	67.7326	18	242	7	1	344	37.8	5.45	0	High	0	985.61	18
FALSE	Master Protein	AT1G04410.1	Lactate/malate dehydrogenase family protein	80.1205	23	255	10	1	332	35.5	6.55	15	High	0	983.52	23
FALSE	Master Protein	AT1G50250.1	FTSH protease 1	56.1453	33	226	9	1	716	76.7	5.83	0	High	0	980.25	33
FALSE	Master Protein	AT2G33150.1	peroxisomal 3-ketoacyl-CoA thiolase 3	74.026	28	218	25	1	462	48.5	8.34	4	High	0	978.97	28
FALSE	Master Protein	AT3G05900.1	neurofilament protein-related	85.5869	59	242	59	1	673	73.4	4.35	0	High	0	978.65	59
FALSE	Master Protein	AT4G20850.1	tripeptidyl peptidase ii	51.5942	64	252	64	1	1380	152.3	6.07	0	High	0	970.23	64
FALSE	Master Protein	AT3G62030.2	rotamase CYP 4	49.5208	13	272	11	1	313	34.3	9.1	1	High	0	969.75	13
FALSE	Master Protein	AT1G63940.2	monodehydroascorbate reductase 6	64.0974	26	258	25	1	493	53.3	8.02	1	High	0	968.12	26
FALSE	Master Protein	AT1G31340.1	related to ubiquitin 1	52.5641	9	288	2	1	156	17.4	6.06	0	High	0	963.73	9
FALSE	Master Protein	AT3G52590.1	ubiquitin extension protein 1	53.9062	8	287	1	1	128	14.7	9.92	0	High	0	957.3	8
FALSE	Master Protein	AT3G54050.2	high cyclic electron flow 1	45.5635	20	211	20	1	417	45.1	5.4	0	High	0	957.15	20
FALSE	Master Protein	AT2G15620.1	nitrite reductase 1	62.4573	38	270	38	1	586	65.5	6.28	0	High	0	955.91	38
FALSE	Master Protein	AT2G24270.3	aldehyde dehydrogenase 11A3	65.121	26	239	1	1	496	53	6.64	34	High	0	955.56	26
FALSE	Master Protein	AT3G55440.1	triosephosphate isomerase	90.5512	18	228	17	1	254	27.2	5.5	0	High	0	944.02	18
FALSE	Master Protein	AT1G20010.1	tubulin beta-5 chain	68.1514	24	255	7	1	449	50.3	4.77	2	High	0	939.93	24
FALSE	Master Protein	AT2G36460.1	Aldolase superfamily protein	79.8883	23	226	13	1	358	38.4	7.39	1	High	0	939.41	23
FALSE	Master Protein	AT3G23810.1	S-adenosyl-l-homocysteine (SAH) hydrolase 2	62.6804	25	227	7	1	485	53.1	5.74	0	High	0	921.27	25
FALSE	Master Protein	AT5G09810.1	actin 7	71.618	22	234	7	1	377	41.7	5.49	20	High	0	917.56	22
FALSE	Master Protein	AT5G03300.1	adenosine kinase 2	68.4058	19	219	8	1	345	37.8	5.26	11	High	0	916.56	19
FALSE	Master Protein	AT1G74470.1	Pyridine nucleotide-disulphide oxidoreductase family protein	64.0257	27	213	27	1	467	51.8	8.91	0	High	0	915.74	27
FALSE	Master Protein	AT1G07890.2	ascorbate peroxidase 1	70	18	225	17	1	250	27.5	6.13	1	High	0	912.5	18
FALSE	Master Protein	AT3G08530.1	Clathrin, heavy chain	45.0969	67	230	11	1	1703	193.1	5.38	0	High	0	910.34	67
FALSE	Master Protein	AT2G21170.1	triosephosphate isomerase	54.6032	20	221	18	1	315	33.3	7.83	2	High	0	909.18	20
FALSE	Master Protein	AT1G62750.1	Translation elongation factor EFG/EF2 protein	60.0255	36	223	36	1	783	86	5.6	0	High	0	905.92	36
FALSE	Master Protein	AT4G35090.1	catalase 2	57.7236	23	245	12	1	492	56.9	7.12	12	High	0	903	23
FALSE	Master Protein	AT4G28750.1	Photosystem I reaction centre subunit IV / PsaE protein	60.8392	7	238	5	1	143	15	9.92	0	High	0	902.83	7
FALSE	Master Protein	AT3G52960.1	Thioredoxin superfamily protein	60.2564	13	208	13	1	234	24.7	9.03	0	High	0	900.37	13
FALSE	Master Protein	AT5G55220.1	trigger factor type chaperone family protein	65.0823	39	243	39	1	547	61.7	5.33	0	High	0	896.3	39
FALSE	Master Protein	AT3G58610.2	ketol-acid reductoisomerase	33.8409	18	207	18	1	591	63.8	6.8	0	High	0	895.97	18
FALSE	Master Protein	AT2G24200.2	Cytosol aminopeptidase family protein	61.9231	23	207	16	1	520	54.5	5.92	9	High	0	894.06	23
FALSE	Master Protein	AT3G11130.1	Clathrin, heavy chain	45.3372	68	226	12	1	1705	193.1	5.4	57	High	0	892.35	68
FALSE	Master Protein	AT5G09590.1	mitochondrial HSO70 2	53.2258	35	235	26	1	682	72.9	5.78	0	High	0	891.05	35
FALSE	Master Protein	AT2G24270.4	aldehyde dehydrogenase 11A3	65.4076	26	217	1	1	503	53.8	6.64	0	High	0	889.39	26
FALSE	Master Protein	AT2G07698.1	ATPase, F1 complex, alpha subunit protein	27.5418	19	247	17	1	777	85.9	5.57	0	High	0	885.95	19
FALSE	Master Protein	AT1G20020.1	ferredoxin-NADP(+)-oxidoreductase 2	51.7615	19	206	16	1	369	41.1	8.31	0	High	0	882.59	19
FALSE	Master Protein	AT3G23990.1	heat shock protein 60	70.5373	42	234	26	1	577	61.2	5.78	18	High	0	881.67	42
FALSE	Master Protein	AT1G01320.2	Tetratricopeptide repeat (TPR)-like superfamily protein	47.0062	73	218	65	1	1787	197.4	6.28	0	High	0	881.51	73
FALSE	Master Protein	AT3G16400.2	nitrile specifier protein 1	64.8936	29	228	8	1	470	51.6	5.53	1	High	0	874.34	29
FALSE	Master Protein	AT4G26530.2	Aldolase superfamily protein	76.5363	23	207	21	1	358	38.3	5.81	0	High	0	868.32	23
FALSE	Master Protein	AT3G48730.1	glutamate-1-semialdehyde 2,1-aminomutase 2	51.6949	17	207	7	1	472	50.1	7.39	12	High	0	858.66	17
FALSE	Master Protein	AT5G20720.1	chaperonin 20	71.9368	19	215	19	1	253	26.8	8.88	0	High	0	849.5	19
FALSE	Master Protein	AT5G07350.2	TUDOR-SN protein 1	61.8669	55	218	38	1	1007	110	7.5	18	High	0	845.38	55
FALSE	Master Protein	AT3G16450.1	Mannose-binding lectin superfamily protein	61.3333	18	181	17	1	300	32	5.22	0	High	0	834.01	18
FALSE	Master Protein	AT1G06950.1	translocon at the inner envelope membrane of chloroplasts 110	48.8189	47	206	47	1	1016	112.1	5.97	0	High	0	831.88	47
FALSE	Master Protein	AT1G29900.1	carbamoyl phosphate synthetase B	46.0826	48	208	48	1	1187	129.9	5.73	0	High	0	824.08	48
FALSE	Master Protein	AT2G43030.1	Ribosomal protein L3 family protein	60.8856	18	222	18	1	271	29.3	10.43	0	High	0	822.61	18
FALSE	Master Protein	AT1G22530.1	PATELLIN 2	71.3031	54	211	50	1	683	76	4.92	4	High	0	815.7	54
FALSE	Master Protein	AT1G53240.1	Lactate/malate dehydrogenase family protein	61.2903	18	186	8	1	341	35.8	8.35	10	High	0	806.64	18
FALSE	Master Protein	AT1G09340.1	chloroplast RNA binding	63.2275	21	205	21	1	378	42.6	8.16	0	High	0	799.74	21
FALSE	Master Protein	AT2G35370.1	glycine decarboxylase complex H	41.2121	7	188	2	1	165	17.9	5.34	6	High	0	786.36	7
FALSE	Master Protein	AT1G09210.1	calreticulin 1b	57.3113	33	200	24	1	424	48.1	4.53	11	High	0	781.04	33
FALSE	Master Protein	AT5G26780.1	serine hydroxymethyltransferase 2	56.2863	25	204	15	1	517	57.3	8.75	0	High	0	775.19	25
FALSE	Master Protein	AT1G72150.1	PATELLIN 1	64.9215	43	208	40	1	573	64	4.83	0	High	0	775.19	43
FALSE	Master Protein	AT5G60600.1	4-hydroxy-3-methylbut-2-enyl diphosphate synthase	54.386	40	209	40	1	741	82.2	6.43	0	High	0	772.9	40
FALSE	Master Protein	AT4G20260.1	plasma-membrane associated cation-binding protein 1	84.4444	27	194	27	1	225	24.6	4.96	0	High	0	770.88	27
FALSE	Master Protein	AT1G14810.1	semialdehyde dehydrogenase family protein	46.6667	15	174	15	1	375	40.7	7.01	0	High	0	770.45	15
FALSE	Master Protein	AT3G25860.1	2-oxoacid dehydrogenases acyltransferase family protein	59.1667	20	175	18	1	480	50	8.37	0	High	0	765.31	20
FALSE	Master Protein	AT5G12250.1	beta-6 tubulin	72.8285	25	204	7	1	449	50.6	4.82	3	High	0	763.49	25
FALSE	Master Protein	AT1G63770.3	Peptidase M1 family protein	51.8744	45	195	45	1	987	110.7	6.48	0	High	0	763.47	45
FALSE	Master Protein	AT5G47210.1	Hyaluronan / mRNA binding family	56.0224	21	217	17	1	357	38	8.78	3	High	0	762.43	21
FALSE	Master Protein	AT3G09630.1	Ribosomal protein L4/L1 family	54.1872	25	191	10	1	406	44.7	10.35	18	High	0	762.4	25
FALSE	Master Protein	AT5G66190.1	ferredoxin-NADP(+)-oxidoreductase 1	63.8889	23	198	20	1	360	40.3	8.13	5	High	0	755.49	23
FALSE	Master Protein	AT3G53230.1	ATPase, AAA-type, CDC48 protein	57.7914	40	189	7	1	815	90.3	5.16	0	High	0	753.12	40
FALSE	Master Protein	AT1G23190.1	Phosphoglucomutase/phosphomannomutase family protein	62.4357	28	185	16	1	583	63.1	6.3	0	High	0	752.25	28
FALSE	Master Protein	AT2G18020.1	Ribosomal protein L2 family	74.8062	20	176	6	1	258	27.8	10.9	16	High	0	748.82	20
FALSE	Master Protein	AT1G43170.3	ribosomal protein 1	66.581	33	212	22	1	389	44.5	10.17	13	High	0	747.46	33
FALSE	Master Protein	AT1G77510.1	PDI-like 1-2	63.5827	33	192	26	1	508	56.3	5	1	High	0	744.25	33
FALSE	Master Protein	ATCG01060.1	iron-sulfur cluster binding;electron carriers;4 iron, 4 sulfur cluster binding	82.716	7	190	7	1	81	9	7.08	0	High	0	743	7
FALSE	Master Protein	AT5G23060.1	calcium sensing receptor	50.646	18	169	18	1	387	41.3	9.39	0	High	0	741.61	18
FALSE	Master Protein	AT5G63570.1	glutamate-1-semialdehyde-2,1-aminomutase	48.7342	16	179	6	1	474	50.3	6.87	0	High	0	739.05	16
FALSE	Master Protein	AT3G47520.1	malate dehydrogenase	50.6203	16	180	14	1	403	42.4	8.51	0	High	0	730.03	16
FALSE	Master Protein	AT1G49760.1	poly(A) binding protein 8	47.0939	28	178	26	1	671	72.7	7.53	1	High	0	727.91	28
FALSE	Master Protein	AT1G09780.1	Phosphoglycerate mutase, 2,3-bisphosphoglycerate-independent	60.3232	31	197	21	1	557	60.5	5.53	11	High	0	727.86	31
FALSE	Master Protein	AT5G61780.1	TUDOR-SN protein 2	63.5533	53	183	36	1	985	107.7	6.55	0	High	0	722.18	53
FALSE	Master Protein	AT2G47390.1	Prolyl oligopeptidase family protein	46.2019	36	174	36	1	961	106.2	6.42	0	High	0	722.14	36
FALSE	Master Protein	AT1G50200.1	Alanyl-tRNA synthetase	48.5543	47	187	47	1	1003	110.4	6.46	0	High	0	721.92	47
FALSE	Master Protein	AT5G37510.2	NADH-ubiquinone dehydrogenase, mitochondrial, putative	50.4011	29	168	29	1	748	81.5	6.64	0	High	0	716.15	29
FALSE	Master Protein	AT3G01480.1	cyclophilin 38	60.1831	22	181	22	1	437	48	5.16	0	High	0	713.63	22
FALSE	Master Protein	AT1G76180.1	Dehydrin family protein	84.8649	20	180	18	1	185	20.8	5.48	0	High	0	708.29	20
FALSE	Master Protein	AT3G08590.1	Phosphoglycerate mutase, 2,3-bisphosphoglycerate-independent	68.3929	30	196	20	1	560	60.7	5.85	0	High	0	702.5	30
FALSE	Master Protein	AT2G30970.1	aspartate aminotransferase 1	66.7442	24	165	24	1	430	47.7	8.19	0	High	0	701.7	24
FALSE	Master Protein	AT3G59970.3	methylenetetrahydrofolate reductase 1	61.8243	36	183	24	1	592	66.2	5.82	12	High	0	701.31	36
FALSE	Master Protein	AT2G21660.1	cold, circadian rhythm, and rna binding 2	93.75	16	164	14	1	176	16.9	6.15	2	High	0	695.94	16
FALSE	Master Protein	AT1G32470.1	Single hybrid motif superfamily protein	61.4458	7	173	2	1	166	17.9	5.19	0	High	0	695.84	7
FALSE	Master Protein	AT5G36700.1	2-phosphoglycolate phosphatase 1	52.7624	18	167	17	1	362	39.7	7.25	1	High	0	691.49	18
FALSE	Master Protein	AT1G75780.1	tubulin beta-1 chain	66.443	23	191	6	1	447	50.2	4.79	0	High	0	688.16	23
FALSE	Master Protein	AT4G13430.1	isopropyl malate isomerase large subunit 1	51.277	21	173	21	1	509	55	7.84	0	High	0	686.94	21
FALSE	Master Protein	AT3G16430.1	jacalin-related lectin 31	39.8649	12	162	7	1	296	32.2	6.29	0	High	0	685.84	12
FALSE	Master Protein	AT3G29320.1	Glycosyl transferase, family 35	59.5634	47	174	46	1	962	108.5	5.47	1	High	0	685.24	47
FALSE	Master Protein	AT1G20260.1	ATPase, V1 complex, subunit B protein	65.9138	26	164	6	1	487	54.3	5.1	0	High	0	683.82	26
FALSE	Master Protein	AT1G23740.1	Oxidoreductase, zinc-binding dehydrogenase family protein	63.7306	23	168	23	1	386	41	8.35	0	High	0	679.1	23
FALSE	Master Protein	AT5G08280.1	hydroxymethylbilane synthase	64.6597	26	188	26	1	382	41	8.47	0	High	0	678.23	26
FALSE	Master Protein	AT2G41220.1	glutamate synthase 2	39.2879	51	174	41	1	1629	177.6	7.01	0	High	0	678.18	51
FALSE	Master Protein	AT1G66200.1	glutamine synthase clone F11	49.1573	17	168	3	1	356	39.2	5.27	13	High	0	677.71	17
FALSE	Master Protein	AT2G43750.2	O-acetylserine (thiol) lyase B	72.1939	23	170	19	1	392	41.6	8.02	5	High	0	676.91	23
FALSE	Master Protein	AT5G26000.1	thioglucoside glucohydrolase 1	49.7227	24	170	23	1	541	61.1	5.92	1	High	0	675.7	24
FALSE	Master Protein	AT3G46740.1	translocon at the outer envelope membrane of chloroplasts 75-III	50.1222	32	152	32	1	818	89.1	8.79	0	High	0	673.68	32
FALSE	Master Protein	AT1G54270.1	eif4a-2	54.1262	24	173	7	1	412	46.7	5.68	18	High	0	671.97	24
FALSE	Master Protein	AT4G18480.1	P-loop containing nucleoside triphosphate hydrolases superfamily protein	46.6981	21	189	11	1	424	46.2	6.47	0	High	0	671.24	21
FALSE	Master Protein	AT5G02870.1	Ribosomal protein L4/L1 family	55.5283	24	166	9	1	407	44.7	10.3	0	High	0	670.12	24
FALSE	Master Protein	AT3G12110.1	actin-11	64.191	20	178	3	1	377	41.6	5.39	0	High	0	668.9	20
FALSE	Master Protein	AT3G11630.1	Thioredoxin superfamily protein	53.0075	13	151	6	1	266	29.1	7.44	7	High	0	666.22	13
FALSE	Master Protein	AT2G30110.1	ubiquitin-activating enzyme 1	51.2037	47	170	42	1	1080	120.2	5.27	5	High	0	661.72	47
FALSE	Master Protein	AT2G33210.1	heat shock protein 60-2	56.5812	33	182	17	1	585	61.9	6.68	0	High	0	659.8	33
FALSE	Master Protein	AT1G50480.1	10-formyltetrahydrofolate synthetase	56.1514	32	161	31	1	634	67.8	6.71	1	High	0	658.15	32
FALSE	Master Protein	AT2G32240.1	FUNCTIONS IN: molecular_function unknown; INVOLVED IN: response to cadmium ion; LOCATED IN: plasma membrane; EXPRESSED IN: 25 plant structures; EXPRESSED DURING: 13 growth stages; CONTAINS InterPro DOMAIN/s: Prefoldin (InterPro:IPR009053); BEST Arabidopsis thaliana protein match is: unknown protein (TAIR:AT1G05320.3); Has 470429 Blast hits to 168274 proteins in 4282 species: Archae - 6896; Bacter…	60.9902	79	175	76	1	1333	148.5	4.75	3	High	0	652.36	79
FALSE	Master Protein	AT1G51980.1	Insulinase (Peptidase family M16) protein	57.6541	25	165	16	1	503	54.4	6.33	9	High	0	651.77	25
FALSE	Master Protein	AT3G13920.1	eukaryotic translation initiation factor 4A1	52.1845	23	168	4	1	412	46.7	5.68	2	High	0	649.55	23
FALSE	Master Protein	AT1G56340.1	calreticulin 1a	55.2941	27	179	18	1	425	48.5	4.6	0	High	0	647.39	27
FALSE	Master Protein	AT1G70730.3	Phosphoglucomutase/phosphomannomutase family protein	56.6465	29	159	17	1	662	72.5	7.12	14	High	0	646.25	29
FALSE	Master Protein	AT1G15340.1	methyl-CPG-binding domain 10	69.7917	49	178	47	1	384	42.3	4.67	2	High	0	646.07	49
FALSE	Master Protein	AT4G38510.5	ATPase, V1 complex, subunit B protein	64.9798	26	155	6	1	494	55.1	5.25	28	High	0	643.97	26
FALSE	Master Protein	AT1G34430.1	2-oxoacid dehydrogenases acyltransferase family protein	56.9892	20	161	18	1	465	48.3	8.78	5	High	0	641.42	20
FALSE	Master Protein	AT1G43670.1	Inositol monophosphatase family protein	57.478	20	150	20	1	341	37.3	5.47	0	High	0	640.78	20
FALSE	Master Protein	AT1G74260.1	purine biosynthesis 4	42.6439	48	161	48	1	1407	153.9	5.36	0	High	0	639.31	48
FALSE	Master Protein	AT4G10340.1	light harvesting complex of photosystem II 5	62.5	17	158	17	1	280	30.1	6.37	0	High	0	639.18	17
FALSE	Master Protein	AT5G03630.1	Pyridine nucleotide-disulphide oxidoreductase family protein	66.6667	25	156	22	1	435	47.5	5.31	0	High	0	635.58	25
FALSE	Master Protein	AT2G41740.1	villin 2	64.5492	49	165	40	1	976	107.8	5.29	1	High	0	634.19	49
FALSE	Master Protein	AT1G03630.1	protochlorophyllide oxidoreductase C	64.3392	25	164	20	1	401	43.9	9.11	5	High	0	633.13	25
FALSE	Master Protein	AT5G57350.2	H(+)-ATPase 3	39.1992	32	160	11	1	949	104.4	7.18	4	High	0	627.83	32
FALSE	Master Protein	AT1G18080.1	Transducin/WD40 repeat-like superfamily protein	69.1131	23	167	17	1	327	35.7	7.71	6	High	0	626.34	23
FALSE	Master Protein	AT3G18890.1	NAD(P)-binding Rossmann-fold superfamily protein	50.39	29	151	29	1	641	68.3	8.1	0	High	0	624.62	29
FALSE	Master Protein	AT3G52880.2	monodehydroascorbate reductase 1	56.6524	25	156	23	1	466	50.1	8.16	2	High	0	624.38	25
FALSE	Master Protein	AT5G42950.1	GYF domain-containing protein	46.9078	63	154	63	1	1714	187.5	6.74	0	High	0	623.92	63
FALSE	Master Protein	AT2G42600.2	phosphoenolpyruvate carboxylase 2	57.5286	52	162	33	1	963	109.7	5.8	20	High	0	622.17	52
FALSE	Master Protein	AT4G18360.1	Aldolase-type TIM barrel family protein	24.4565	9	144	1	1	368	40.5	8.31	0	High	0	621.73	9
FALSE	Master Protein	AT4G13930.1	serine hydroxymethyltransferase 4	54.1401	21	150	21	1	471	51.7	7.23	0	High	0	621.6	21
FALSE	Master Protein	AT4G36130.1	Ribosomal protein L2 family	72.093	18	143	4	1	258	27.9	10.83	0	High	0	620.8	18
FALSE	Master Protein	AT3G45140.1	lipoxygenase 2	61.8304	51	162	51	1	896	102	5.62	0	High	0	618.76	51
FALSE	Master Protein	AT1G29930.1	chlorophyll A/B binding protein 1	47.191	8	159	1	1	267	28.2	5.66	7	High	0	616.12	8
FALSE	Master Protein	AT1G29920.1	chlorophyll A/B-binding protein 2	48.3146	8	158	1	1	267	28.2	5.43	0	High	0	611.96	8
FALSE	Master Protein	AT3G60240.3	eukaryotic translation initiation factor 4G	41.971	61	153	61	1	1725	187.6	7.71	0	High	0	608.99	61
FALSE	Master Protein	AT3G63460.1	transducin family protein / WD-40 repeat family protein	43.0254	40	157	2	1	1104	119.8	5.14	41	High	0	607.19	40
FALSE	Master Protein	AT3G57410.1	villin 3	61.3472	50	154	41	1	965	106.3	5.85	9	High	0	607.01	50
FALSE	Master Protein	AT3G16410.1	nitrile specifier protein 4	55.5735	31	158	10	1	619	67.6	5.15	23	High	0	606.74	31
FALSE	Master Protein	AT2G23350.1	poly(A) binding protein 4	50.1511	30	148	28	1	662	71.6	6.86	2	High	0	606.36	30
FALSE	Master Protein	AT3G08580.1	ADP/ATP carrier 1	37.5328	17	183	9	1	381	41.4	9.83	12	High	0	606.18	17
FALSE	Master Protein	AT3G53460.2	chloroplast RNA-binding protein 29	56.7251	15	160	11	1	342	36	5.34	4	High	0	605.76	15
FALSE	Master Protein	AT4G24190.1	Chaperone protein htpG family protein	51.7618	41	160	37	1	823	94.1	5.03	3	High	0	601.22	41
FALSE	Master Protein	AT5G15090.2	voltage dependent anion channel 3	69.3431	15	141	12	1	274	29.2	8.21	0	High	0	600.09	15
FALSE	Master Protein	AT3G04790.1	Ribose 5-phosphate isomerase, type A protein	64.4928	17	142	17	1	276	29.3	6.02	0	High	0	598.62	17
FALSE	Master Protein	AT1G72370.1	40s ribosomal protein SA	39.2617	12	172	8	1	298	32.3	5.15	5	High	0	598.04	12
FALSE	Master Protein	AT3G03250.1	UDP-GLUCOSE PYROPHOSPHORYLASE 1	65.4584	26	158	13	1	469	51.7	6.13	0	High	0	597.36	26
FALSE	Master Protein	AT4G26970.1	aconitase 2	41.005	35	164	31	1	995	108.4	7.15	0	High	0	594.45	35
FALSE	Master Protein	AT4G30920.1	Cytosol aminopeptidase family protein	49.3997	22	143	8	1	583	61.3	7.08	8	High	0	592.78	22
FALSE	Master Protein	AT1G10760.1	Pyruvate phosphate dikinase, PEP/pyruvate binding domain	40.5289	53	161	53	1	1399	156.5	5.92	0	High	0	591.62	53
FALSE	Master Protein	AT3G53750.1	actin 3	62.3342	20	159	6	1	377	41.8	5.49	5	High	0	590.64	20
FALSE	Master Protein	AT3G19450.1	GroES-like zinc-binding alcohol dehydrogenase family protein	68.2192	18	139	17	1	365	39.1	5.55	2	High	0	589.9	18
FALSE	Master Protein	AT1G17220.1	Translation initiation factor 2, small GTP-binding protein	44.6394	45	152	45	1	1026	109.7	7.44	0	High	0	589.75	45
FALSE	Master Protein	AT1G09620.1	ATP binding;leucine-tRNA ligases;aminoacyl-tRNA ligases;nucleotide binding;ATP binding;aminoacyl-tRNA ligases	50.7791	43	147	43	1	1091	123.4	6.02	0	High	0	588.35	43
FALSE	Master Protein	AT4G14880.2	O-acetylserine (thiol) lyase (OAS-TL) isoform A1	72.3602	17	144	15	1	322	33.8	6.14	4	High	0	586.74	17
FALSE	Master Protein	AT5G43940.1	GroES-like zinc-binding dehydrogenase family protein	52.2427	17	145	17	1	379	40.7	6.95	0	High	0	585	17
FALSE	Master Protein	AT1G54000.1	GDSL-like Lipase/Acylhydrolase superfamily protein	50.8951	16	140	11	1	391	43.2	7.11	1	High	0	584.71	16
FALSE	Master Protein	AT3G44310.3	nitrilase 1	54.3353	21	140	10	1	346	38.1	6.28	11	High	0	581.35	21
FALSE	Master Protein	AT1G20620.1	catalase 3	59.9593	23	151	18	1	492	56.7	7.64	2	High	0	580.73	23
FALSE	Master Protein	AT1G52100.1	Mannose-binding lectin superfamily protein	54.4622	23	143	21	1	437	47.6	7.62	1	High	0	579.88	23
FALSE	Master Protein	AT2G20260.1	photosystem I subunit E-2	56.5517	7	144	5	1	145	15.2	9.95	2	High	0	579.41	7
FALSE	Master Protein	AT5G44120.3	RmlC-like cupins superfamily protein	56.1441	19	132	18	1	472	52.6	7.8	1	High	0	575.24	19
FALSE	Master Protein	AT2G45290.1	Transketolase	31.444	17	146	10	1	741	79.9	6.58	0	High	0	573.96	17
FALSE	Master Protein	AT5G17310.2	UDP-glucose pyrophosphorylase 2	63.8298	26	149	13	1	470	51.9	6.01	16	High	0	573.55	26
FALSE	Master Protein	AT3G46970.1	alpha-glucan phosphorylase 2	65.3983	42	139	41	1	841	95.1	6.11	0	High	0	572.56	42
FALSE	Master Protein	AT3G63460.2	transducin family protein / WD-40 repeat family protein	42.6497	39	148	1	1	1102	119.6	5.14	0	High	0	571.86	39
FALSE	Master Protein	AT1G59610.1	dynamin-like 3	61.6304	53	156	26	1	920	100.2	9.04	28	High	0	571.69	53
FALSE	Master Protein	AT1G78850.1	D-mannose binding lectin protein with Apple-like carbohydrate-binding domain	61.4512	23	153	12	1	441	49	7.65	12	High	0	570.26	23
FALSE	Master Protein	AT1G20440.1	cold-regulated 47	90.566	28	139	24	1	265	29.9	4.77	4	High	0	570.11	28
FALSE	Master Protein	AT1G10290.1	dynamin-like protein 6	62.3632	52	159	25	1	914	99.1	9.04	0	High	0	568.03	52
FALSE	Master Protein	AT1G64740.1	alpha-1 tubulin	52.4444	19	141	8	1	450	49.8	5.05	0	High	0	567.68	19
FALSE	Master Protein	AT3G23400.1	Plastid-lipid associated protein PAP / fibrillin family protein	48.5915	12	146	12	1	284	30.4	6.13	0	High	0	567.09	12
FALSE	Master Protein	AT2G20420.1	ATP citrate lyase (ACL) family protein	64.8456	33	146	33	1	421	45.3	6.71	0	High	0	563.94	33
FALSE	Master Protein	AT3G15730.1	phospholipase D alpha 1	48.642	34	149	34	1	810	91.8	5.87	0	High	0	563.17	34
FALSE	Master Protein	AT4G25080.1	magnesium-protoporphyrin IX methyltransferase	57.0513	18	142	18	1	312	33.8	7.87	0	High	0	562.8	18
FALSE	Master Protein	AT2G40490.1	Uroporphyrinogen decarboxylase	51.0152	20	143	20	1	394	43.6	8.21	0	High	0	562.22	20
FALSE	Master Protein	AT1G15690.1	Inorganic H pyrophosphatase family protein	27.9221	22	138	22	1	770	80.8	5.26	0	High	0	561.4	22
FALSE	Master Protein	AT5G60640.1	PDI-like 1-4	57.1189	34	154	34	1	597	66.3	4.61	0	High	0	561.12	34
FALSE	Master Protein	AT4G16155.1	dihydrolipoyl dehydrogenases	43.3333	21	135	9	1	630	67	7.77	14	High	0	558.79	21
FALSE	Master Protein	AT5G06290.1	2-cysteine peroxiredoxin B	49.4505	12	125	5	1	273	29.8	5.74	0	High	0	556.5	12
FALSE	Master Protein	AT1G26630.1	Eukaryotic translation initiation factor 5A-1 (eIF-5A 1) protein	77.3585	13	149	8	1	159	17.1	5.94	5	High	0	552.87	13
FALSE	Master Protein	AT5G22800.1	Alanyl-tRNA synthetase, class IIc	52.454	49	146	49	1	978	107.8	5.59	0	High	0	551.82	49
FALSE	Master Protein	AT4G39680.1	SAP domain-containing protein	57.5039	32	137	32	1	633	69.4	4.97	0	High	0	551.65	32
FALSE	Master Protein	AT1G48920.1	nucleolin like 1	49.1921	28	160	27	1	557	58.7	5.22	1	High	0	551.18	28
FALSE	Master Protein	AT3G52140.1	tetratricopeptide repeat (TPR)-containing protein	42.2666	52	135	52	1	1403	153.2	6.37	0	High	0	549.82	52
FALSE	Master Protein	AT1G56500.1	haloacid dehalogenase-like hydrolase family protein	54.4076	47	138	47	1	1055	114.3	5.63	0	High	0	548.64	47
FALSE	Master Protein	AT2G44160.1	methylenetetrahydrofolate reductase 2	60.7744	34	156	23	1	594	66.8	5.5	0	High	0	548.5	34
FALSE	Master Protein	AT1G59870.1	ABC-2 and Plant PDR ABC-type transporter family protein	35.3302	53	149	28	1	1469	165	7.9	26	High	0	544.82	53
FALSE	Master Protein	AT1G78830.1	Curculin-like (mannose-binding) lectin family protein	57.8022	23	138	14	1	455	50.3	8.47	9	High	0	544.61	23
FALSE	Master Protein	AT5G54160.1	O-methyltransferase 1	61.9835	21	136	21	1	363	39.6	5.95	0	High	0	543.18	21
FALSE	Master Protein	AT5G52640.1	heat shock protein 90.1	32.0567	24	140	12	1	705	81.1	5.03	0	High	0	541.96	24
FALSE	Master Protein	AT2G35040.1	AICARFT/IMPCHase bienzyme family protein	54.3624	26	128	26	1	596	64.9	6.92	0	High	0	541.43	26
FALSE	Master Protein	AT5G66760.1	succinate dehydrogenase 1-1	55.205	27	134	17	1	634	69.6	6.29	13	High	0	540.65	27
FALSE	Master Protein	AT3G01280.1	voltage dependent anion channel 1	70.2899	17	137	14	1	276	29.4	8.73	3	High	0	540.45	17
FALSE	Master Protein	AT4G29840.1	Pyridoxal-5'-phosphate-dependent enzyme family protein	52.8517	21	139	19	1	526	57.7	7.42	2	High	0	539.66	21
FALSE	Master Protein	AT2G27710.2	60S acidic ribosomal protein family	79.1304	6	107	3	1	115	11.4	4.68	4	High	0	538.2	6
FALSE	Master Protein	AT4G37870.1	phosphoenolpyruvate carboxykinase 1	51.8629	27	126	20	1	671	73.4	7.08	10	High	0	534.7	27
FALSE	Master Protein	AT4G34110.1	poly(A) binding protein 2	51.9873	28	140	26	1	629	68.6	8.21	0	High	0	531.18	28
FALSE	Master Protein	AT1G67280.1	Glyoxalase/Bleomycin resistance protein/Dioxygenase superfamily protein	53.4286	17	137	15	1	350	39.1	7.37	2	High	0	530.2	17
FALSE	Master Protein	AT2G38040.2	acetyl Co-enzyme a carboxylase carboxyltransferase alpha subunit	61.5085	42	135	42	1	769	85.3	5.82	0	High	0	529.87	42
FALSE	Master Protein	AT4G34200.1	D-3-phosphoglycerate dehydrogenase	44.4444	24	136	19	1	603	63.3	6.58	5	High	0	529.63	24
FALSE	Master Protein	AT4G31990.2	aspartate aminotransferase 5	72.1854	28	139	27	1	453	49.8	8.15	1	High	0	526.36	28
FALSE	Master Protein	AT1G55480.1	protein containing PDZ domain, a K-box domain, and a TPR region	68.0597	24	131	24	1	335	37.4	8.12	0	High	0	525.54	24
FALSE	Master Protein	AT5G46290.1	3-ketoacyl-acyl carrier protein synthase I	54.7569	23	135	23	1	473	50.4	8.06	0	High	0	524.72	23
FALSE	Master Protein	AT3G22200.2	Pyridoxal phosphate (PLP)-dependent transferases superfamily protein	47.7583	17	125	17	1	513	56.3	8.25	0	High	0	524.25	17
FALSE	Master Protein	AT2G21390.1	Coatomer, alpha subunit	49.7537	51	142	22	1	1218	136.4	6.92	31	High	0	523.97	51
FALSE	Master Protein	AT3G23940.1	dehydratase family	46.0526	26	149	26	1	608	64.9	6.23	0	High	0	523.59	26
FALSE	Master Protein	AT3G56150.2	eukaryotic translation initiation factor 3C	45.7778	37	136	37	1	900	102.9	5.36	0	High	0	522.95	37
FALSE	Master Protein	AT3G27690.1	photosystem II light harvesting complex gene 2.3	45.4887	7	139	4	1	266	28.8	5.9	0	High	0	522.94	7
FALSE	Master Protein	AT4G33090.1	aminopeptidase M1	57.5654	44	136	44	1	879	98.1	5.5	0	High	0	522.26	44
FALSE	Master Protein	AT4G34870.1	rotamase cyclophilin 5	83.7209	14	142	10	1	172	18.4	8.69	4	High	0	521.57	14
FALSE	Master Protein	AT3G15020.1	Lactate/malate dehydrogenase family protein	54.2522	15	117	5	1	341	35.9	8.19	0	High	0	521.36	15
FALSE	Master Protein	AT5G45930.1	magnesium chelatase i2	58.3732	22	145	12	1	418	46.1	5.5	12	High	0	520.77	22
FALSE	Master Protein	AT5G04590.1	sulfite reductase	35.0467	22	132	22	1	642	71.9	8.31	0	High	0	520.02	22
FALSE	Master Protein	AT2G39310.1	jacalin-related lectin 22	70.524	36	119	35	1	458	50.4	5.3	1	High	0	516.22	36
FALSE	Master Protein	AT4G34450.1	coatomer gamma-2 subunit, putative / gamma-2 coat protein, putative / gamma-2 COP, putative	57.9007	37	129	37	1	886	98.4	5.16	0	High	0	515.85	37
FALSE	Master Protein	AT3G03710.1	polyribonucleotide nucleotidyltransferase, putative	40.8894	37	140	37	1	922	99.5	5.57	0	High	0	513.93	37
FALSE	Master Protein	AT3G63490.1	Ribosomal protein L1p/L10e family	49.711	19	133	19	1	346	37.6	9.26	0	High	0	513.8	19
FALSE	Master Protein	AT3G06650.1	ATP-citrate lyase B-1	47.8618	24	132	9	1	608	65.8	7.81	19	High	0	512.58	24
FALSE	Master Protein	AT3G48000.1	aldehyde dehydrogenase 2B4	52.0446	24	131	21	1	538	58.6	7.46	3	High	0	512.55	24
FALSE	Master Protein	AT3G02230.1	reversibly glycosylated polypeptide 1	69.7479	20	134	6	1	357	40.6	5.92	3	High	0	512	20
FALSE	Master Protein	AT1G11910.1	aspartic proteinase A1	56.917	20	122	18	1	506	54.6	5.54	2	High	0	511.05	20
FALSE	Master Protein	AT4G01800.1	Albino or Glassy Yellow 1	46.771	42	133	42	1	1022	115.1	6.39	0	High	0	510.28	42
FALSE	Master Protein	AT3G25920.1	ribosomal protein L15	46.2094	13	135	13	1	277	29.7	10.77	0	High	0	510.14	13
FALSE	Master Protein	AT5G26742.2	DEAD box RNA helicase (RH3)	43.984	29	135	1	1	748	81.1	7.8	29	High	0	509.79	29
FALSE	Master Protein	AT5G26742.1	DEAD box RNA helicase (RH3)	44.1767	29	135	1	1	747	81	7.59	0	High	0	509.46	29
FALSE	Master Protein	AT5G54770.1	thiazole biosynthetic enzyme, chloroplast (ARA6) (THI1) (THI4)	38.6819	10	123	10	1	349	36.6	6.23	0	High	0	508.45	10
FALSE	Master Protein	AT3G12915.1	Ribosomal protein S5/Elongation factor G/III/V family protein	26.7073	20	142	1	1	820	90.9	6.1	0	High	0	508.32	20
FALSE	Master Protein	AT4G39260.1	cold, circadian rhythm, and RNA binding 1	80.4734	12	114	10	1	169	16.6	5.68	0	High	0	507.59	12
FALSE	Master Protein	AT3G02090.1	Insulinase (Peptidase family M16) protein	64.2185	30	123	30	1	531	59.1	6.79	0	High	0	506.68	30
FALSE	Master Protein	AT5G43330.1	Lactate/malate dehydrogenase family protein	53.9157	20	137	7	1	332	35.7	6.79	0	High	0	505.96	20
FALSE	Master Protein	AT2G17420.1	NADPH-dependent thioredoxin reductase A	57.9365	14	94	10	1	378	40	6.7	4	High	0	505.83	14
FALSE	Master Protein	AT4G39330.1	cinnamyl alcohol dehydrogenase 9	71.9444	19	130	19	1	360	38.9	6.68	0	High	0	505.15	19
FALSE	Master Protein	AT2G40840.1	disproportionating enzyme 2	50.3665	45	131	45	1	955	109.7	5.82	0	High	0	503.83	45
FALSE	Master Protein	AT4G27440.1	protochlorophyllide oxidoreductase B	60.0998	23	125	18	1	401	43.3	9.16	0	High	0	502.34	23
FALSE	Master Protein	AT3G24503.1	aldehyde dehydrogenase 2C4	66.2675	32	135	32	1	501	54.3	5.69	0	High	0	502.26	32
FALSE	Master Protein	AT2G01140.1	Aldolase superfamily protein	47.8261	17	124	14	1	391	42.3	8.09	0	High	0	501.25	17
FALSE	Master Protein	AT1G24180.1	Thiamin diphosphate-binding fold (THDP-binding) superfamily protein	58.5242	26	131	17	1	393	43.3	7.91	0	High	0	500.11	26
FALSE	Master Protein	AT4G04640.1	ATPase, F1 complex, gamma subunit protein	48.5255	17	129	17	1	373	40.9	8	0	High	0	499.81	17
FALSE	Master Protein	AT1G29880.1	glycyl-tRNA synthetase / glycine--tRNA ligase	52.2634	36	135	36	1	729	81.9	7.01	0	High	0	498.69	36
FALSE	Master Protein	AT5G09660.1	peroxisomal NAD-malate dehydrogenase 2	60.7345	15	115	3	1	354	37.3	7.99	14	High	0	498.56	15
FALSE	Master Protein	AT3G29360.1	UDP-glucose 6-dehydrogenase family protein	69.7917	26	121	12	1	480	53.1	6	3	High	0	496.88	26
FALSE	Master Protein	AT5G15450.1	casein lytic proteinase B3	49.0702	45	124	42	1	968	108.9	6.23	3	High	0	496.66	45
FALSE	Master Protein	AT2G34420.1	photosystem II light harvesting complex gene B1B2	47.9245	8	142	1	1	265	28	5.44	1	High	0	495.54	8
FALSE	Master Protein	AT3G61440.1	cysteine synthase C1	48.0978	18	142	18	1	368	39.9	8.54	0	High	0	495.5	18
FALSE	Master Protein	AT5G19550.1	aspartate aminotransferase 2	69.1358	25	127	19	1	405	44.2	7.28	1	High	0	495.14	25
FALSE	Master Protein	AT2G31610.1	Ribosomal protein S3 family protein	74.4	19	130	3	1	250	27.5	9.54	1	High	0	494.14	19
FALSE	Master Protein	AT4G12420.2	Cupredoxin superfamily protein	34.4123	24	131	24	1	587	65.6	9.11	0	High	0	493.98	24
FALSE	Master Protein	AT5G61790.1	calnexin 1	51.8868	31	144	19	1	530	60.4	4.91	12	High	0	491.44	31
FALSE	Master Protein	AT1G68010.1	hydroxypyruvate reductase	70.7254	26	118	26	1	386	42.2	7.15	0	High	0	490.2	26
FALSE	Master Protein	AT2G45470.1	FASCICLIN-like arabinogalactan protein 8	32.8571	12	118	8	1	420	43	5.68	4	High	0	489.72	12
FALSE	Master Protein	AT3G62360.1	Carbohydrate-binding-like fold	44.7433	45	130	45	1	1227	132.9	6.42	0	High	0	489.52	45
FALSE	Master Protein	AT5G19510.1	Translation elongation factor EF1B/ribosomal protein S6 family protein	43.75	9	129	6	1	224	24.2	4.56	1	High	0	488.22	9
FALSE	Master Protein	AT4G35630.1	phosphoserine aminotransferase	53.7209	21	127	12	1	430	47.3	8.06	13	High	0	485.94	21
FALSE	Master Protein	ATCG00350.1	Photosystem I, PsaA/PsaB protein	15.2	15	141	15	1	750	83.2	7.11	0	High	0	485.15	15
FALSE	Master Protein	AT1G17290.1	alanine aminotransferas	43.2781	25	130	16	1	543	59.8	6.43	11	High	0	484.11	25
FALSE	Master Protein	AT3G13930.1	Dihydrolipoamide acetyltransferase, long form protein	42.4861	21	120	16	1	539	58.4	7.65	0	High	0	483.96	21
FALSE	Master Protein	AT2G47510.2	fumarase 1	58.7398	20	111	10	1	492	53	7.88	11	High	0	483.94	20
FALSE	Master Protein	AT4G02930.1	GTP binding Elongation factor Tu family protein	68.7225	26	130	24	1	454	49.4	6.7	2	High	0	483.69	26
FALSE	Master Protein	AT1G53310.3	phosphoenolpyruvate carboxylase 1	47.1562	45	126	14	1	967	110.2	6.06	14	High	0	483.63	45
FALSE	Master Protein	AT5G61410.2	D-ribulose-5-phosphate-3-epimerase	37.3665	7	113	7	1	281	30	8.07	0	High	0	483.26	7
FALSE	Master Protein	AT5G57870.1	MIF4G domain-containing protein / MA3 domain-containing protein	50.5128	37	126	36	1	780	85.5	8.24	1	High	0	481.48	37
FALSE	Master Protein	AT3G44110.1	DNAJ homologue 3	42.381	23	130	8	1	420	46.4	6.11	16	High	0	480.71	23
FALSE	Master Protein	AT3G55410.1	2-oxoglutarate dehydrogenase, E1 component	46.8043	40	120	31	1	1017	115.1	6.93	9	High	0	480.35	40
FALSE	Master Protein	AT1G04480.1	Ribosomal protein L14p/L23e family protein	70	10	125	10	1	140	15	10.48	0	High	0	478.57	10
FALSE	Master Protein	AT2G41840.1	Ribosomal protein S5 family protein	62.4561	20	130	6	1	285	30.9	10.29	0	High	0	478.23	20
FALSE	Master Protein	AT3G11830.1	TCP-1/cpn60 chaperonin family protein	56.7325	32	126	32	1	557	59.7	6.39	0	High	0	477.35	32
FALSE	Master Protein	AT2G33800.1	Ribosomal protein S5 family protein	47.5248	17	141	17	1	303	32.6	8.97	0	High	0	477.32	17
FALSE	Master Protein	AT1G76680.2	12-oxophytodienoate reductase 1	67.7582	22	118	16	1	397	44	7.5	6	High	0	476.93	22
FALSE	Master Protein	AT5G65620.1	Zincin-like metalloproteases family protein	45.1327	31	126	15	1	791	88.7	6.28	16	High	0	476.63	31
FALSE	Master Protein	AT4G17520.1	Hyaluronan / mRNA binding family	58.3333	23	132	21	1	360	38.9	8.75	3	High	0	476.19	23
FALSE	Master Protein	AT5G20890.1	TCP-1/cpn60 chaperonin family protein	69.8292	36	119	36	1	527	57.3	5.87	0	High	0	475.69	36
FALSE	Master Protein	AT3G10740.1	alpha-L-arabinofuranosidase 1	40.2655	24	109	24	1	678	75	5.77	0	High	0	475.67	24
FALSE	Master Protein	AT1G12000.1	Phosphofructokinase family protein	49.6466	26	125	16	1	566	61.4	6.1	14	High	0	475.31	26
FALSE	Master Protein	AT2G41680.1	NADPH-dependent thioredoxin reductase C	43.2892	19	100	19	1	529	57.9	6.77	0	High	0	475.16	19
FALSE	Master Protein	AT5G62790.1	1-deoxy-D-xylulose 5-phosphate reductoisomerase	60.1677	25	122	25	1	477	51.9	7.05	0	High	0	473.28	25
FALSE	Master Protein	AT1G59359.1	Ribosomal protein S5 family protein	62.3239	21	133	6	1	284	30.8	10.26	16	High	0	472.82	21
FALSE	Master Protein	AT3G25660.1	Amidase family protein	47.8585	19	114	19	1	537	57.1	6.57	0	High	0	471.84	19
FALSE	Master Protein	AT1G36160.2	acetyl-CoA carboxylase 1	33.6291	59	128	59	1	2254	251.2	6.52	0	High	0	470.04	59
FALSE	Master Protein	AT5G15650.1	reversibly glycosylated polypeptide 2	64.1667	21	121	8	1	360	40.9	6.13	17	High	0	469.85	21
FALSE	Master Protein	AT4G33680.1	Pyridoxal phosphate (PLP)-dependent transferases superfamily protein	45.3362	17	110	17	1	461	50.4	7.34	0	High	0	469.45	17
FALSE	Master Protein	AT4G26900.1	HIS HF	75.8446	38	119	38	1	592	64.2	6.76	0	High	0	469.32	38
FALSE	Master Protein	AT4G31490.1	Coatomer, beta subunit	49.6835	40	125	4	1	948	106	6.01	0	High	0	468.62	40
FALSE	Master Protein	AT1G72730.1	DEA(D/H)-box RNA helicase family protein	39.372	16	120	4	1	414	46.7	5.33	0	High	0	467.4	16
FALSE	Master Protein	AT4G24620.1	phosphoglucose isomerase 1	51.3866	28	124	28	1	613	67	5.69	0	High	0	467.36	28
FALSE	Master Protein	AT2G13360.2	alanine:glyoxylate aminotransferase	65.8354	18	109	18	1	401	44.2	7.83	0	High	0	467.03	18
FALSE	Master Protein	AT3G07770.1	HEAT SHOCK PROTEIN 89.1	50.6884	34	121	27	1	799	90.5	5.39	0	High	0	466.62	34
FALSE	Master Protein	AT1G08520.1	ALBINA 1	44.8684	33	126	33	1	760	83.2	5.35	0	High	0	466.3	33
FALSE	Master Protein	AT1G79280.2	nuclear pore anchor	37.1158	74	130	74	1	2115	239.2	5.07	0	High	0	466.2	74
FALSE	Master Protein	AT3G16950.2	lipoamide dehydrogenase 1	36.1156	19	113	7	1	623	66.6	8.41	0	High	0	465.89	19
FALSE	Master Protein	AT4G14040.1	selenium-binding protein 2	62.6283	24	124	14	1	487	53.9	6.19	12	High	0	464.39	24
FALSE	Master Protein	AT5G16620.1	hydroxyproline-rich glycoprotein family protein	54.1387	20	119	20	1	447	48.9	5.43	0	High	0	464.21	20
FALSE	Master Protein	AT1G57720.2	Translation elongation factor EF1B, gamma chain	56.9007	21	119	12	1	413	46.4	5.71	14	High	0	463.21	21
FALSE	Master Protein	AT5G35530.1	Ribosomal protein S3 family protein	75	19	122	5	1	248	27.4	9.54	0	High	0	462.33	19
FALSE	Master Protein	AT2G38230.1	pyridoxine biosynthesis 1.1	36.246	12	120	8	1	309	32.8	6	0	High	0	461.18	12
FALSE	Master Protein	AT3G54760.1	dentin sialophosphoprotein-related	55.6818	36	103	36	1	792	86.1	4.45	0	High	0	461.07	36
FALSE	Master Protein	AT1G27090.1	glycine-rich protein	60	16	106	16	1	420	46	5.39	0	High	0	460.84	16
FALSE	Master Protein	AT5G50850.1	Transketolase family protein	44.6281	13	114	13	1	363	39.2	5.83	0	High	0	460.57	13
FALSE	Master Protein	AT3G51800.1	metallopeptidase M24 family protein	62.5	25	126	25	1	392	43	6.8	0	High	0	460.1	25
FALSE	Master Protein	AT5G13490.1	ADP/ATP carrier 2	30.3896	13	136	5	1	385	41.7	9.79	0	High	0	459.75	13
FALSE	Master Protein	AT5G19220.1	ADP glucose pyrophosphorylase large subunit 1	50.9579	26	121	25	1	522	57.6	7.91	1	High	0	459.6	26
FALSE	Master Protein	AT1G03475.1	Coproporphyrinogen III oxidase	53.1088	21	127	21	1	386	43.8	6.7	0	High	0	459.24	21
FALSE	Master Protein	AT3G17820.1	glutamine synthetase 1.3	60.7345	18	112	11	1	354	38.6	6.06	7	High	0	458.8	18
FALSE	Master Protein	AT5G35970.1	P-loop containing nucleoside triphosphate hydrolases superfamily protein	47.9709	36	116	36	1	961	105	7.77	0	High	0	457.44	36
FALSE	Master Protein	AT4G17330.1	G2484-1 protein	37.7025	58	118	58	1	2037	217.9	5.29	0	High	0	457.07	58
FALSE	Master Protein	AT5G51820.1	phosphoglucomutase	43.9807	23	121	23	1	623	67.9	5.74	0	High	0	456.51	23
FALSE	Master Protein	AT3G53870.1	Ribosomal protein S3 family protein	73.494	19	123	4	1	249	27.3	9.54	17	High	0	456.38	19
FALSE	Master Protein	AT3G27740.1	carbamoyl phosphate synthetase A	46.7442	17	110	17	1	430	47	6.02	0	High	0	455.38	17
FALSE	Master Protein	AT1G68560.1	alpha-xylosidase 1	42.2951	34	121	33	1	915	102.3	6.77	1	High	0	454.98	34
FALSE	Master Protein	AT3G03960.1	TCP-1/cpn60 chaperonin family protein	60.6557	28	116	28	1	549	58.9	5.35	0	High	0	454.67	28
FALSE	Master Protein	AT4G31480.2	Coatomer, beta subunit	49.6835	40	121	4	1	948	106.1	5.83	40	High	0	454.34	40
FALSE	Master Protein	AT3G13860.1	heat shock protein 60-3A	63.986	32	118	30	1	572	60.4	6.1	0	High	0	452.96	32
FALSE	Master Protein	AT5G15490.1	UDP-glucose 6-dehydrogenase family protein	66.6667	27	116	13	1	480	53.1	6.04	18	High	0	450.17	27
FALSE	Master Protein	AT1G29470.2	S-adenosyl-L-methionine-dependent methyltransferases superfamily protein	61.4286	45	119	36	1	770	87.1	5.24	9	High	0	449.36	45
FALSE	Master Protein	AT2G27720.1	60S acidic ribosomal protein family	79.1304	6	94	3	1	115	11.4	4.61	0	High	0	447.45	6
FALSE	Master Protein	AT3G54660.1	glutathione reductase	53.2743	21	113	21	1	565	60.8	7.87	0	High	0	446.72	21
FALSE	Master Protein	AT5G16970.1	alkenal reductase	72.1739	18	108	11	1	345	38.1	6.18	10	High	0	445.96	18
FALSE	Master Protein	AT5G27640.1	translation initiation factor 3B1	43.3989	31	117	7	1	712	81.8	5.25	29	High	0	445.3	31
FALSE	Master Protein	AT5G26830.1	Threonyl-tRNA synthetase	49.5063	35	121	35	1	709	80.9	6.98	0	High	0	445.05	35
FALSE	Master Protein	AT5G10470.1	kinesin like protein for actin based chloroplast movement 1	42.8908	47	115	1	1	1273	140.9	6.19	48	High	0	444.56	47
FALSE	Master Protein	AT3G48990.1	AMP-dependent synthetase and ligase family protein	46.8872	22	121	22	1	514	55.5	6.54	0	High	0	444.5	22
FALSE	Master Protein	AT5G35360.1	acetyl Co-enzyme a carboxylase biotin carboxylase subunit	53.6313	23	116	23	1	537	58.4	7.25	0	High	0	443.96	23
FALSE	Master Protein	AT3G14940.1	phosphoenolpyruvate carboxylase 3	45.3512	43	119	14	1	968	110.1	6.04	0	High	0	443.94	43
FALSE	Master Protein	AT1G18270.1	ketose-bisphosphate aldolase class-II family protein	42.6074	51	116	51	1	1373	147	5.85	0	High	0	443.53	51
FALSE	Master Protein	AT1G79340.1	metacaspase 4	69.8565	24	102	23	1	418	45.5	4.82	1	High	0	443.39	24
FALSE	Master Protein	AT5G62670.1	H(+)-ATPase 11	37.2385	31	118	17	1	956	105.1	6.6	1	High	0	442.83	31
FALSE	Master Protein	AT3G62120.2	Class II aaRS and biotin synthetases superfamily protein	65.283	31	115	31	1	530	60.7	6.4	0	High	0	442.67	31
FALSE	Master Protein	AT4G38740.1	rotamase CYP 1	86.0465	10	124	4	1	172	18.4	7.81	0	High	0	442.19	10
FALSE	Master Protein	AT2G16600.1	rotamase CYP 3	79.7688	12	122	9	1	173	18.5	8.43	0	High	0	442.13	12
FALSE	Master Protein	AT3G09200.1	Ribosomal protein L10 family protein	41.875	12	115	4	1	320	34.1	5.07	9	High	0	441.48	12
FALSE	Master Protein	ATCG01310.1	ribosomal protein L2	55.4745	14	109	14	1	274	29.8	10.84	0	High	0	441.36	14
FALSE	Master Protein	AT3G24430.1	ATP binding	52.4436	22	99	22	1	532	57.7	6.29	0	High	0	440.45	22
FALSE	Master Protein	AT5G41670.1	6-phosphogluconate dehydrogenase family protein	72.0739	27	116	14	1	487	53.3	5.8	11	High	0	440.26	27
FALSE	Master Protein	AT5G28840.1	GDP-D-mannose 3',5'-epimerase	51.7241	22	117	22	1	377	42.7	6.21	0	High	0	439.69	22
FALSE	Master Protein	AT5G10470.2	kinesin like protein for actin based chloroplast movement 1	42.9356	47	113	1	1	1274	141	6.19	0	High	0	439.23	47
FALSE	Master Protein	AT2G05990.1	NAD(P)-binding Rossmann-fold superfamily protein	48.4615	16	103	16	1	390	41.2	9	0	High	0	438.2	16
FALSE	Master Protein	AT2G14720.1	vacuolar sorting receptor 4	57.3248	34	110	6	1	628	69.8	5.48	29	High	0	437.54	34
FALSE	Master Protein	AT3G05530.1	regulatory particle triple-A ATPase 5A	62.0283	24	104	9	1	424	47.5	5.03	17	High	0	436.86	24
FALSE	Master Protein	AT3G16470.1	Mannose-binding lectin superfamily protein	55.6541	18	94	18	1	451	48.5	5.26	0	High	0	436.81	18
FALSE	Master Protein	AT4G14030.1	selenium-binding protein 1	47.7551	20	116	10	1	490	54	5.67	0	High	0	435.5	20
FALSE	Master Protein	AT4G13780.1	methionine--tRNA ligase, putative / methionyl-tRNA synthetase, putative / MetRS, putative	64.2409	41	116	41	1	797	89.8	7.01	0	High	0	434.96	41
FALSE	Master Protein	AT1G62020.1	Coatomer, alpha subunit	45.8059	48	122	19	1	1216	136.5	6.98	0	High	0	434.38	48
FALSE	Master Protein	AT4G11420.1	eukaryotic translation initiation factor 3A	46.5046	47	112	47	1	987	114.2	9.17	0	High	0	434.33	47
FALSE	Master Protein	AT5G51970.2	GroES-like zinc-binding alcohol dehydrogenase family protein	83.7912	20	110	20	1	364	39.2	5.97	0	High	0	433.95	20
FALSE	Master Protein	AT3G02360.1	6-phosphogluconate dehydrogenase family protein	60.9053	27	113	23	1	486	53.5	7.42	5	High	0	433.38	27
FALSE	Master Protein	AT3G59760.1	O-acetylserine (thiol) lyase isoform C	61.8938	22	108	19	1	433	46.1	8.37	0	High	0	433.38	22
FALSE	Master Protein	AT3G14310.1	pectin methylesterase 3	37.3311	20	101	15	1	592	64.2	8.87	5	High	0	432.28	20
FALSE	Master Protein	AT1G18500.1	methylthioalkylmalate synthase-like 4	58.1616	29	107	11	1	631	68.6	6.6	20	High	0	431.12	29
FALSE	Master Protein	AT5G07030.1	Eukaryotic aspartyl protease family protein	50.989	17	102	17	1	455	48.7	9.64	0	High	0	429.42	17
FALSE	Master Protein	AT5G26570.1	catalytics;carbohydrate kinases;phosphoglucan, water dikinases	41.0535	42	107	42	1	1196	131.2	6.24	0	High	0	427.78	42
FALSE	Master Protein	AT1G70320.1	ubiquitin-protein ligase 2	24.3576	68	119	37	1	3658	403.4	4.94	31	High	0	426.61	68
FALSE	Master Protein	AT5G01410.1	Aldolase-type TIM barrel family protein	35.2751	12	115	8	1	309	33.2	6.11	6	High	0	426.54	12
FALSE	Master Protein	AT5G20250.4	Raffinose synthase family protein	39.6919	32	114	30	1	844	94.2	7.37	2	High	0	425.98	32
FALSE	Master Protein	AT5G49360.1	beta-xylosidase 1	39.5349	26	106	24	1	774	83.5	8.51	2	High	0	425.95	26
FALSE	Master Protein	AT5G39570.1	FUNCTIONS IN: molecular_function unknown; INVOLVED IN: biological_process unknown; LOCATED IN: cytosol, nucleus; EXPRESSED IN: 25 plant structures; EXPRESSED DURING: 14 growth stages; BEST Arabidopsis thaliana protein match is: glycine-rich protein (TAIR:AT3G29075.1); Has 30201 Blast hits to 17322 proteins in 780 species: Archae - 12; Bacteria - 1396; Metazoa - 17338; Fungi - 3422; Plants - 5037;…	52.4934	16	102	15	1	381	43.5	4.78	1	High	0	425.2	16
FALSE	Master Protein	AT1G78570.1	rhamnose biosynthesis 1	54.4096	33	122	19	1	669	75.3	7.28	15	High	0	425.16	33
FALSE	Master Protein	AT5G26280.1	TRAF-like family protein	54.2857	18	107	15	1	350	39.4	8.54	3	High	0	424.8	18
FALSE	Master Protein	AT3G58510.1	DEA(D/H)-box RNA helicase family protein	58.4967	27	106	17	1	612	66	6.68	13	High	0	424.26	27
FALSE	Master Protein	AT4G19410.1	Pectinacetylesterase family protein	63.9386	18	99	14	1	391	42.1	9.11	4	High	0	423.2	18
FALSE	Master Protein	AT3G48560.1	chlorsulfuron/imidazolinone resistant 1	32.0896	17	108	17	1	670	72.5	6.65	0	High	0	423	17
FALSE	Master Protein	AT1G59900.1	pyruvate dehydrogenase complex E1 alpha subunit	61.1825	28	121	19	1	389	43	7.49	13	High	0	420.06	28
FALSE	Master Protein	AT3G59920.1	RAB GDP dissociation inhibitor 2	59.9099	22	113	15	1	444	49.5	5.74	0	High	0	419.81	22
FALSE	Master Protein	AT5G04430.2	binding to TOMV RNA 1L (long form)	61.0778	18	112	18	1	334	36	6.14	0	High	0	418.39	18
FALSE	Master Protein	AT1G33590.1	Leucine-rich repeat (LRR) family protein	53.8784	20	101	19	1	477	51.7	8.91	1	High	0	417.14	20
FALSE	Master Protein	AT5G13650.2	elongation factor family protein	48.6686	26	97	26	1	676	74.4	7.25	0	High	0	416.94	26
FALSE	Master Protein	AT5G19760.1	Mitochondrial substrate carrier family protein	56.0403	13	105	13	1	298	31.9	9.23	0	High	0	415.44	13
FALSE	Master Protein	AT2G14740.1	vaculolar sorting receptor 3	57.3248	33	106	5	1	628	69.7	5.36	0	High	0	415.25	33
FALSE	Master Protein	AT5G07090.1	Ribosomal protein S4 (RPS4A) family protein	64.1221	19	120	2	1	262	29.9	10.17	21	High	0	414.74	19
FALSE	Master Protein	AT5G20290.1	Ribosomal protein S8e family protein	52.2523	13	100	13	1	222	25	10.32	0	High	0	414.05	13
FALSE	Master Protein	AT3G59780.1	Rhodanese/Cell cycle control phosphatase superfamily protein	46.3557	28	106	28	1	686	73.9	4.97	0	High	0	414.02	28
FALSE	Master Protein	AT5G36210.1	alpha/beta-Hydrolases superfamily protein	47.6712	34	103	34	1	730	81.3	5.8	0	High	0	413.33	34
FALSE	Master Protein	AT1G47260.1	gamma carbonic anhydrase 2	68.705	16	97	13	1	278	30	7.24	4	High	0	412.69	16
FALSE	Master Protein	AT5G49460.1	ATP citrate lyase subunit B 2	42.2697	22	107	7	1	608	65.8	7.64	0	High	0	412.49	22
FALSE	Master Protein	AT1G16030.1	heat shock protein 70B	17.3375	9	93	1	1	646	70.9	5.41	0	High	0	412.36	9
FALSE	Master Protein	AT5G42650.1	allene oxide synthase	52.5097	24	100	24	1	518	58.2	8.66	0	High	0	412	24
FALSE	Master Protein	AT2G44100.1	guanosine nucleotide diphosphate dissociation inhibitor 1	60.6742	24	107	14	1	445	49.8	5.74	13	High	0	409.98	24
FALSE	Master Protein	AT1G64190.1	6-phosphogluconate dehydrogenase family protein	61.3963	23	104	9	1	487	53.3	5.45	0	High	0	409.56	23
FALSE	Master Protein	AT5G66530.1	Galactose mutarotase-like superfamily protein	77.5244	15	101	15	1	307	33.7	5.96	0	High	0	408.89	15
FALSE	Master Protein	AT2G46280.1	TGF-beta receptor interacting protein 1	69.5122	22	104	21	1	328	36.4	6.99	1	High	0	407.96	22
FALSE	Master Protein	AT5G30510.1	ribosomal protein S1	36.2981	17	117	17	1	416	45.1	5.25	0	High	0	406.94	17
FALSE	Master Protein	AT4G15530.6	pyruvate orthophosphate dikinase	45.8982	35	104	35	1	963	105.1	6.38	0	High	0	406.93	35
FALSE	Master Protein	AT3G52380.1	chloroplast RNA-binding protein 33	39.5137	10	104	10	1	329	35.7	4.64	0	High	0	406.53	10
FALSE	Master Protein	AT5G48300.1	ADP glucose pyrophosphorylase 1	53.2692	21	103	21	1	520	56.6	6.57	0	High	0	406.45	21
FALSE	Master Protein	AT3G57610.1	adenylosuccinate synthase	52.449	27	105	27	1	490	52.9	7.14	0	High	0	406.07	27
FALSE	Master Protein	AT4G27520.1	early nodulin-like protein 2	26.9341	11	102	11	1	349	35	9.32	0	High	0	405.05	11
FALSE	Master Protein	AT1G20950.1	Phosphofructokinase family protein	54.0717	27	99	15	1	614	67.1	6.99	0	High	0	404.88	27
FALSE	Master Protein	AT4G23670.1	Polyketide cyclase/dehydrase and lipid transport superfamily protein	66.8874	12	112	11	1	151	17.5	6.37	2	High	0	404.61	12
FALSE	Master Protein	AT5G52920.1	plastidic pyruvate kinase beta subunit 1	45.4231	23	108	21	1	579	63.5	7.03	2	High	0	404.44	23
FALSE	Master Protein	AT5G11670.1	NADP-malic enzyme 2	50.8503	24	102	20	1	588	64.4	6.42	5	High	0	404.24	24
FALSE	Master Protein	AT2G20580.1	26S proteasome regulatory subunit S2 1A	48.2604	34	99	19	1	891	98.1	5.1	16	High	0	403.87	34
FALSE	Master Protein	AT3G13300.1	Transducin/WD40 repeat-like superfamily protein	38.3185	44	110	34	1	1344	145.6	6.1	10	High	0	403.55	44
FALSE	Master Protein	AT5G37600.1	glutamine synthase clone R1	41.573	15	93	3	1	356	39.1	5.47	1	High	0	402.39	15
FALSE	Master Protein	AT5G64120.1	Peroxidase superfamily protein	65.8537	13	86	13	1	328	34.9	8.21	0	High	0	402.37	13
FALSE	Master Protein	AT3G02530.1	TCP-1/cpn60 chaperonin family protein	66.3551	28	101	7	1	535	58.9	6.21	23	High	0	401.91	28
FALSE	Master Protein	AT5G25780.1	eukaryotic translation initiation factor 3B-2	42.0168	29	106	5	1	714	82.1	5.24	0	High	0	401.36	29
FALSE	Master Protein	AT1G03880.1	cruciferin 2	51.8681	14	85	13	1	455	50.5	6.99	0	High	0	401.31	14
FALSE	Master Protein	AT5G07440.2	glutamate dehydrogenase 2	45.9854	16	97	11	1	411	44.7	6.54	0	High	0	401.16	16
FALSE	Master Protein	AT1G74040.1	2-isopropylmalate synthase 1	52.4564	26	96	8	1	631	68.1	6.37	0	High	0	401.14	26
FALSE	Master Protein	AT3G18190.1	TCP-1/cpn60 chaperonin family protein	54.6642	27	107	27	1	536	57.7	7.68	0	High	0	400.9	27
FALSE	Master Protein	AT2G25970.1	KH domain-containing protein	32.2785	17	97	16	1	632	64.6	5.49	1	High	0	400.79	17
FALSE	Master Protein	AT5G03940.1	chloroplast signal recognition particle 54 kDa subunit	42.7305	23	102	23	1	564	61.2	9.44	0	High	0	400.34	23
FALSE	Master Protein	AT1G29370.1	Kinase-related protein of unknown function (DUF1296)	45.4874	22	88	5	1	831	90.8	6.11	20	High	0	400.12	22
FALSE	Master Protein	AT3G44320.1	nitrilase 3	62.1387	18	93	10	1	346	38	5.95	2	High	0	399.91	18
FALSE	Master Protein	AT1G62740.1	stress-inducible protein, putative	57.9685	31	102	23	1	571	64.5	6.18	9	High	0	399.84	31
FALSE	Master Protein	AT2G07732.1	Ribulose bisphosphate carboxylase large chain, catalytic domain	31.8966	4	130	1	1	116	13.1	8.47	0	High	0	399.43	4
FALSE	Master Protein	AT3G04840.1	Ribosomal protein S3Ae	69.084	23	112	8	1	262	29.8	9.76	15	High	0	399.39	23
FALSE	Master Protein	AT3G05420.2	acyl-CoA binding protein 4	62.1824	31	102	1	1	669	73.2	5.3	0	High	0	399.32	31
FALSE	Master Protein	AT3G13460.1	evolutionarily conserved C-terminal region 2	47.0765	27	98	21	1	667	72.4	5.96	5	High	0	399.14	27
FALSE	Master Protein	AT1G49630.2	presequence protease 2	38.7037	35	111	20	1	1080	121.1	5.49	0	High	0	398.86	35
FALSE	Master Protein	AT1G71695.1	Peroxidase superfamily protein	36.0335	13	97	13	1	358	39.5	8.28	0	High	0	398.74	13
FALSE	Master Protein	AT1G19870.1	IQ-domain 32	57.3048	43	104	43	1	794	86.8	5.3	0	High	0	398.6	43
FALSE	Master Protein	AT1G53750.1	regulatory particle triple-A 1A	69.7183	28	106	28	1	426	47.8	6.65	0	High	0	398.44	28
FALSE	Master Protein	AT1G71500.1	Rieske (2Fe-2S) domain-containing protein	44.9477	12	99	12	1	287	31.7	8.73	0	High	0	397.94	12
FALSE	Master Protein	AT5G03690.2	Aldolase superfamily protein	43.454	13	106	8	1	359	38.6	7.74	0	High	0	396.74	13
FALSE	Master Protein	AT4G04020.1	fibrillin	70.7547	17	101	16	1	318	34.9	5.6	1	High	0	396.41	17
FALSE	Master Protein	AT1G65960.2	glutamate decarboxylase 2	52.4291	24	104	20	1	494	56.1	5.4	5	High	0	396.01	24
FALSE	Master Protein	AT3G05420.1	acyl-CoA binding protein 4	62.1257	31	101	1	1	668	73	5.3	32	High	0	395.61	31
FALSE	Master Protein	AT5G09660.4	peroxisomal NAD-malate dehydrogenase 2	54.5455	13	92	1	1	363	38.7	8.95	0	High	0	394.87	13
FALSE	Master Protein	AT4G37300.1	maternal effect embryo arrest 59	75.1445	9	84	9	1	173	18.8	4.68	0	High	0	393.46	9
FALSE	Master Protein	AT5G13630.1	magnesium-chelatase subunit chlH, chloroplast, putative / Mg-protoporphyrin IX chelatase, putative (CHLH)	35.0471	46	105	46	1	1381	153.5	6.1	0	High	0	393.01	46
FALSE	Master Protein	AT5G58420.1	Ribosomal protein S4 (RPS4A) family protein	64.1221	18	112	1	1	262	29.8	10.21	0	High	0	392.72	18
FALSE	Master Protein	AT1G80600.1	HOPW1-1-interacting 1	54.0481	22	95	22	1	457	48.8	6.8	0	High	0	392.49	22
FALSE	Master Protein	AT1G70410.2	beta carbonic anhydrase 4	82.1429	21	102	19	1	280	30.8	7.09	2	High	0	392.2	21
FALSE	Master Protein	AT2G34430.1	light-harvesting chlorophyll-protein complex II subunit B1	49.2481	8	107	2	1	266	28.2	5.27	0	High	0	390.89	8
FALSE	Master Protein	AT3G53110.1	P-loop containing nucleoside triphosphate hydrolases superfamily protein	66.5323	28	94	28	1	496	55.3	5.29	0	High	0	389.87	28
FALSE	Master Protein	AT1G69740.2	Aldolase superfamily protein	43.7209	16	99	16	1	430	46.7	7.31	0	High	0	389.3	16
FALSE	Master Protein	AT1G48630.1	receptor for activated C kinase 1B	68.0982	21	108	6	1	326	35.8	7.11	0	High	0	388.07	21
FALSE	Master Protein	AT3G18060.1	transducin family protein / WD-40 repeat family protein	47.4548	24	95	21	1	609	66	5.96	3	High	0	387.31	24
FALSE	Master Protein	AT1G66270.1	Glycosyl hydrolase superfamily protein	38.9313	19	110	10	1	524	59.6	7.02	0	High	0	386.11	19
FALSE	Master Protein	AT1G29670.1	GDSL-like Lipase/Acylhydrolase superfamily protein	52.6171	13	81	13	1	363	39.8	8.54	0	High	0	386.08	13
FALSE	Master Protein	AT2G36580.1	Pyruvate kinase family protein	57.4953	27	100	8	1	527	57.5	6.35	0	High	0	385.84	27
FALSE	Master Protein	AT1G66280.1	Glycosyl hydrolase superfamily protein	38.5496	20	105	12	1	524	59.7	7.21	12	High	0	385.73	20
FALSE	Master Protein	AT3G52990.1	Pyruvate kinase family protein	56.5465	28	105	9	1	527	57.5	7.11	21	High	0	384.97	28
FALSE	Master Protein	AT4G32520.2	serine hydroxymethyltransferase 3	55.1985	24	103	24	1	529	57.9	8.88	0	High	0	384.13	24
FALSE	Master Protein	AT5G67500.2	voltage dependent anion channel 2	55.7756	17	101	17	1	303	32.9	7.58	0	High	0	383.97	17
FALSE	Master Protein	AT3G20370.1	TRAF-like family protein	47.4934	15	92	15	1	379	43.4	6.58	0	High	0	383.66	15
FALSE	Master Protein	AT3G22890.1	ATP sulfurylase 1	51.8359	21	102	10	1	463	51.4	6.81	10	High	0	381.81	21
FALSE	Master Protein	AT1G61520.1	photosystem I light harvesting complex gene 3	27.4725	7	96	7	1	273	29.2	8.68	0	High	0	381.07	7
FALSE	Master Protein	AT1G78820.1	D-mannose binding lectin protein with Apple-like carbohydrate-binding domain	49.8901	19	102	10	1	455	50.6	8.47	0	High	0	380.9	19
FALSE	Master Protein	AT5G39320.1	UDP-glucose 6-dehydrogenase family protein	63.9583	25	100	11	1	480	53.1	5.85	1	High	0	380.77	25
FALSE	Master Protein	AT1G62480.1	Vacuolar calcium-binding protein-related	84.8684	12	78	12	1	152	16.6	4.02	0	High	0	379.92	12
FALSE	Master Protein	AT1G33140.1	Ribosomal protein L6 family	70.6186	16	96	10	1	194	22	9.45	6	High	0	379.63	16
FALSE	Master Protein	AT4G09010.1	ascorbate peroxidase 4	52.4355	18	90	18	1	349	37.9	8.46	0	High	0	379.54	18
FALSE	Master Protein	AT5G10540.1	Zincin-like metalloproteases family protein	48.2168	31	103	15	1	701	79	5.63	0	High	0	379.52	31
FALSE	Master Protein	AT3G32980.1	Peroxidase superfamily protein	49.4318	15	109	7	1	352	38.8	6.67	8	High	0	378.47	15
FALSE	Master Protein	AT1G20960.2	U5 small nuclear ribonucleoprotein helicase, putative	29.4334	55	104	55	1	2171	247	5.74	0	High	0	377.61	55
FALSE	Master Protein	AT3G18130.1	receptor for activated C kinase 1C	68.7117	22	106	7	1	326	35.8	7.12	9	High	0	377.6	22
FALSE	Master Protein	AT1G62660.1	Glycosyl hydrolases family 32 protein	30.0926	16	98	13	1	648	72.2	5.6	0	High	0	377.54	16
FALSE	Master Protein	AT3G56240.1	copper chaperone	70.2479	10	103	10	1	121	13	4.93	0	High	0	377.23	10
FALSE	Master Protein	AT1G62380.1	ACC oxidase 2	50.625	13	97	10	1	320	36.2	5.12	0	High	0	377.14	13
FALSE	Master Protein	AT3G14990.1	Class I glutamine amidotransferase-like superfamily protein	53.3163	16	88	16	1	392	41.8	5.41	0	High	0	376.88	16
FALSE	Master Protein	AT4G30160.2	villin 4	47.6094	44	102	40	1	983	110.4	6.29	0	High	0	376.53	44
FALSE	Master Protein	AT1G29350.1	Kinase-related protein of unknown function (DUF1296)	42.9603	21	85	4	1	831	90.8	5.85	0	High	0	376.05	21
FALSE	Master Protein	AT3G24170.3	glutathione-disulfide reductase	57.1142	22	85	21	1	499	53.8	6.8	1	High	0	374.32	22
FALSE	Master Protein	AT1G16720.1	high chlorophyll fluorescence phenotype 173	61.5385	31	95	31	1	598	65.7	9.03	0	High	0	374.2	31
FALSE	Master Protein	AT3G48420.1	Haloacid dehalogenase-like hydrolase (HAD) superfamily protein	56.1129	18	102	18	1	319	34.2	8.06	0	High	0	374.17	18
FALSE	Master Protein	AT5G13980.2	Glycosyl hydrolase family 38 protein	31.0547	32	102	32	1	1024	115.8	6.44	0	High	0	373.88	32
FALSE	Master Protein	AT2G47470.1	thioredoxin family protein	56.5097	22	96	21	1	361	39.5	6.06	0	High	0	372.78	22
FALSE	Master Protein	AT1G69830.1	alpha-amylase-like 3	45.6595	34	94	34	1	887	99.8	6.07	0	High	0	372.33	34
FALSE	Master Protein	AT1G05190.1	Ribosomal protein L6 family	63.6771	17	111	17	1	223	24.7	9.89	0	High	0	371.05	17
FALSE	Master Protein	AT4G34490.1	cyclase associated protein 1	70.7983	29	105	29	1	476	50.9	6.65	0	High	0	370.25	29
FALSE	Master Protein	AT1G16350.1	Aldolase-type TIM barrel family protein	54.7809	21	86	17	1	502	54	6.48	5	High	0	370.01	21
FALSE	Master Protein	AT1G42550.1	plastid movement impaired1	50.6524	35	95	35	1	843	93.8	5.31	0	High	0	369.42	35
FALSE	Master Protein	AT5G58330.1	lactate/malate dehydrogenase family protein	47.4041	21	97	21	1	443	48.3	6.16	0	High	0	369.07	21
FALSE	Master Protein	AT4G01690.1	Flavin containing amine oxidoreductase family	63.1285	26	91	26	1	537	57.7	9.03	0	High	0	368.93	26
FALSE	Master Protein	AT1G02080.1	transcription regulators	21.0202	42	93	42	1	2431	269.7	5.62	0	High	0	367.72	42
FALSE	Master Protein	AT1G79230.1	mercaptopyruvate sulfurtransferase 1	56.2005	18	88	18	1	379	41.9	6.39	0	High	0	367.23	18
FALSE	Master Protein	AT3G48930.1	Nucleic acid-binding, OB-fold-like protein	55	12	110	6	1	160	17.9	10.56	6	High	0	366.91	12
FALSE	Master Protein	AT5G41790.1	COP1-interactive protein 1	37.6419	59	104	57	1	1586	181.9	4.91	2	High	0	366.72	59
FALSE	Master Protein	AT1G30230.2	Glutathione S-transferase, C-terminal-like;Translation elongation factor EF1B/ribosomal protein S6	59.2308	12	88	7	1	260	28.8	4.74	6	High	0	366.54	12
FALSE	Master Protein	AT1G30580.1	GTP binding	61.1675	23	91	23	1	394	44.4	6.81	0	High	0	365.37	23
FALSE	Master Protein	AT1G20630.1	catalase 1	40.6504	19	105	8	1	492	56.7	7.42	0	High	0	365.32	19
FALSE	Master Protein	AT2G17630.1	Pyridoxal phosphate (PLP)-dependent transferases superfamily protein	49.763	18	96	9	1	422	46.6	8.06	0	High	0	365.17	18
FALSE	Master Protein	AT1G62390.1	Octicosapeptide/Phox/Bem1p (PB1) domain-containing protein / tetratricopeptide repeat (TPR)-containing protein	46.3382	30	90	30	1	751	82.7	5.62	0	High	0	363.07	30
FALSE	Master Protein	AT3G20820.1	Leucine-rich repeat (LRR) family protein	40	11	85	11	1	365	39.8	8.41	0	High	0	362.62	11
FALSE	Master Protein	AT1G01790.1	K+ efflux antiporter 1	27.4937	26	86	21	1	1193	128	5.34	5	High	0	362.55	26
FALSE	Master Protein	AT3G26060.2	Thioredoxin superfamily protein	49.3088	11	91	11	1	217	23.8	9.51	0	High	0	362.42	11
FALSE	Master Protein	AT5G52310.1	low-temperature-responsive protein 78 (LTI78) / desiccation-responsive protein 29A (RD29A)	65.3521	37	94	37	1	710	77.8	4.54	0	High	0	361.76	37
FALSE	Master Protein	AT4G17090.1	chloroplast beta-amylase	62.5912	30	98	30	1	548	61.3	7.05	0	High	0	361.65	30
FALSE	Master Protein	AT5G43060.1	Granulin repeat cysteine protease family protein	43.1965	18	88	16	1	463	51.2	6.21	3	High	0	361.17	18
FALSE	Master Protein	AT5G49030.3	tRNA synthetase class I (I, L, M and V) family protein	38.3894	40	89	40	1	1279	143.3	8.43	0	High	0	360.63	40
FALSE	Master Protein	AT2G30200.1	catalytics;transferases;[acyl-carrier-protein] S-malonyltransferases;binding	48.0916	16	89	16	1	393	41.5	8.56	0	High	0	360.18	16
FALSE	Master Protein	AT4G18810.1	NAD(P)-binding Rossmann-fold superfamily protein	50.3356	26	93	26	1	596	65.4	8.16	0	High	0	358.76	26
FALSE	Master Protein	AT1G47128.1	Granulin repeat cysteine protease family protein	34.1991	17	95	14	1	462	50.9	5.41	2	High	0	358.4	17
FALSE	Master Protein	AT1G37130.1	nitrate reductase 2	42.7481	36	96	31	1	917	102.8	6.54	5	High	0	357.62	36
FALSE	Master Protein	AT3G14067.1	Subtilase family protein	31.1454	16	84	16	1	777	81.8	6.77	0	High	0	357.39	16
FALSE	Master Protein	AT5G42790.1	proteasome alpha subunit F1	66.5468	18	97	7	1	278	30.5	5.08	12	High	0	357.06	18
FALSE	Master Protein	AT2G05920.1	Subtilase family protein	41.7772	23	89	23	1	754	80	8.35	0	High	0	356.88	23
FALSE	Master Protein	AT4G30170.1	Peroxidase family protein	69.5385	19	92	16	1	325	35.8	9.1	3	High	0	356.71	19
FALSE	Master Protein	AT1G76810.1	eukaryotic translation initiation factor 2 (eIF-2) family protein	40.7264	45	93	45	1	1294	142	5.39	0	High	0	356.7	45
FALSE	Master Protein	AT5G03650.1	starch branching enzyme 2.2	46.7081	34	98	27	1	805	92.5	5.86	8	High	0	356.66	34
FALSE	Master Protein	AT1G26850.2	S-adenosyl-L-methionine-dependent methyltransferases superfamily protein	57.6299	32	94	32	1	616	69.6	6.96	0	High	0	356.36	32
FALSE	Master Protein	AT1G77940.1	Ribosomal protein L7Ae/L30e/S12e/Gadd45 family protein	71.4286	9	92	2	1	112	12.3	9.58	0	High	0	356.16	9
FALSE	Master Protein	AT4G12800.1	photosystem I subunit l	25.5708	6	86	6	1	219	23	9.85	0	High	0	356.04	6
FALSE	Master Protein	AT1G48600.1	S-adenosyl-L-methionine-dependent methyltransferases superfamily protein	64.2105	27	95	13	1	475	54	5.17	16	High	0	356.01	27
FALSE	Master Protein	AT3G20630.1	ubiquitin-specific protease 14	51.192	35	99	35	1	797	88.3	5.21	0	High	0	355.39	35
FALSE	Master Protein	AT3G50370.1	unknown protein; FUNCTIONS IN: molecular_function unknown; INVOLVED IN: biological_process unknown; LOCATED IN: cellular_component unknown; EXPRESSED IN: 26 plant structures; EXPRESSED DURING: 15 growth stages; Has 27734 Blast hits to 16708 proteins in 1259 species: Archae - 81; Bacteria - 3434; Metazoa - 10876; Fungi - 2514; Plants - 987; Viruses - 212; Other Eukaryotes - 9630 (source: NCBI BLin…	26.7625	48	99	48	1	2156	236.1	6.4	0	High	0	355.38	48
FALSE	Master Protein	AT5G22650.1	histone deacetylase 2B	51.634	17	94	17	1	306	32.3	4.79	0	High	0	354.7	17
FALSE	Master Protein	AT5G14910.1	Heavy metal transport/detoxification superfamily protein	36.5169	4	82	4	1	178	18.9	5.27	0	High	0	354.61	4
FALSE	Master Protein	AT1G54220.1	Dihydrolipoamide acetyltransferase, long form protein	46.3822	23	89	18	1	539	58.4	7.84	5	High	0	354.39	23
FALSE	Master Protein	AT1G13020.1	eukaryotic initiation factor 4B2	63.9344	35	98	31	1	549	59.3	8.72	4	High	0	353.31	35
FALSE	Master Protein	AT4G00570.1	NAD-dependent malic enzyme 2	56.0132	27	91	27	1	607	66.6	7.06	0	High	0	353.08	27
FALSE	Master Protein	AT4G21150.3	ribophorin II (RPN2) family protein	43.5601	28	91	28	1	691	74.6	7.53	0	High	0	353.07	28
FALSE	Master Protein	AT5G16070.1	TCP-1/cpn60 chaperonin family protein	60	26	91	5	1	535	58.9	6.25	0	High	0	352.87	26
FALSE	Master Protein	AT3G25230.2	rotamase FKBP 1	41.1032	26	101	24	1	562	62.9	5.58	2	High	0	352.65	26
FALSE	Master Protein	AT5G45280.2	Pectinacetylesterase family protein	56.5217	16	79	12	1	391	42	8.66	0	High	0	352.16	16
FALSE	Master Protein	AT1G32200.2	phospholipid/glycerol acyltransferase family protein	46.841	18	88	18	1	459	50.4	6.55	0	High	0	351.41	18
FALSE	Master Protein	AT4G34740.1	GLN phosphoribosyl pyrophosphate amidotransferase 2	45.8111	22	82	13	1	561	61	6.76	10	High	0	351.31	22
FALSE	Master Protein	AT5G19990.1	regulatory particle triple-A ATPase 6A	61.8138	22	91	2	1	419	47.2	8.88	23	High	0	351.1	22
FALSE	Master Protein	AT3G25530.1	glyoxylate reductase 1	58.8235	14	89	14	1	289	30.7	6.13	0	High	0	350.83	14
FALSE	Master Protein	ATCG01130.1	Ycf1 protein	28.2195	50	101	50	1	1786	213.6	9.73	0	High	0	350.72	50
FALSE	Master Protein	AT2G31390.1	pfkB-like carbohydrate kinase family protein	58.4615	19	92	16	1	325	35.3	5.49	3	High	0	350.44	19
FALSE	Master Protein	AT5G19820.1	ARM repeat superfamily protein	37.0968	32	88	32	1	1116	123.7	4.87	0	High	0	350.41	32
FALSE	Master Protein	AT3G06350.1	dehydroquinate dehydratase, putative / shikimate dehydrogenase, putative	50.2488	25	88	25	1	603	65.8	6.87	0	High	0	350.3	25
FALSE	Master Protein	AT4G26630.1	DEK domain-containing chromatin associated protein	40.498	41	101	40	1	763	85.2	5.07	1	High	0	350.15	41
FALSE	Master Protein	AT1G69410.1	eukaryotic elongation factor 5A-3	58.2278	10	89	4	1	158	17.2	5.94	1	High	0	349.82	10
FALSE	Master Protein	AT1G12270.1	stress-inducible protein, putative	61.3636	31	96	22	1	572	64.5	6.28	1	High	0	349.18	31
FALSE	Master Protein	AT1G56110.1	homolog of nucleolar protein NOP56	51.9157	29	89	20	1	522	58.6	8.7	9	High	0	349.04	29
FALSE	Master Protein	AT3G15520.1	Cyclophilin-like peptidyl-prolyl cis-trans isomerase family protein	46.3519	19	91	19	1	466	50.5	7.06	0	High	0	348.87	19
FALSE	Master Protein	AT4G34670.1	Ribosomal protein S3Ae	69.8473	23	97	8	1	262	29.8	9.74	0	High	0	348.84	23
FALSE	Master Protein	AT2G37660.1	NAD(P)-binding Rossmann-fold superfamily protein	41.2308	13	82	11	1	325	34.9	8.31	2	High	0	348.21	13
FALSE	Master Protein	AT3G13790.1	Glycosyl hydrolases family 32 protein	42.9795	23	88	21	1	584	66.2	9.07	2	High	0	348.04	23
FALSE	Master Protein	AT1G79440.1	aldehyde dehydrogenase 5F1	45.0758	24	91	24	1	528	56.5	6.92	0	High	0	347.1	24
FALSE	Master Protein	AT4G27500.1	proton pump interactor 1	55.719	30	91	30	1	612	68.8	9.03	0	High	0	346.35	30
FALSE	Master Protein	AT3G54960.1	PDI-like 1-3	46.8048	25	93	25	1	579	64.2	4.83	0	High	0	346.29	25
FALSE	Master Protein	AT4G24680.1	modifier of snc1	37.9818	45	88	45	1	1427	155.3	9.38	0	High	0	345.78	45
FALSE	Master Protein	AT2G19520.1	Transducin family protein / WD-40 repeat family protein	53.2544	21	79	19	1	507	55.7	6.23	2	High	0	345.77	21
FALSE	Master Protein	AT5G17820.1	Peroxidase superfamily protein	68.6901	17	84	17	1	313	34.1	10.05	0	High	0	345.46	17
FALSE	Master Protein	AT3G54400.1	Eukaryotic aspartyl protease family protein	36.7059	12	92	12	1	425	45.4	9.09	0	High	0	344.95	12
FALSE	Master Protein	AT1G74030.1	enolase 1	44.0252	17	78	17	1	477	51.4	6.13	0	High	0	344.89	17
FALSE	Master Protein	AT5G11880.1	Pyridoxal-dependent decarboxylase family protein	46.0123	21	87	5	1	489	54.1	6.67	0	High	0	343.24	21
FALSE	Master Protein	AT5G11520.1	aspartate aminotransferase 3	54.343	25	94	20	1	449	48.9	9.29	5	High	0	343.21	25
FALSE	Master Protein	AT5G55280.1	homolog of bacterial cytokinesis Z-ring protein FTSZ 1-1	42.7252	14	83	14	1	433	45.5	7.4	0	High	0	342.07	14
FALSE	Master Protein	AT2G45300.1	RNA 3'-terminal phosphate cyclase/enolpyruvate transferase, alpha/beta	37.6923	20	92	6	1	520	55.7	6.7	15	High	0	341.9	20
FALSE	Master Protein	AT4G10320.1	tRNA synthetase class I (I, L, M and V) family protein	34.7899	37	98	37	1	1190	135.4	6.3	0	High	0	341.56	37
FALSE	Master Protein	AT5G22060.1	DNAJ homologue 2	46.3007	23	95	8	1	419	46.4	7.12	0	High	0	340.23	23
FALSE	Master Protein	AT5G14590.1	Isocitrate/isopropylmalate dehydrogenase family protein	54.6392	25	96	19	1	485	54.2	7.97	0	High	0	339.19	25
FALSE	Master Protein	AT1G20450.1	Dehydrin family protein	63.0769	17	90	15	1	260	29.5	5.17	0	High	0	338.96	17
FALSE	Master Protein	AT5G42080.1	dynamin-like protein	54.918	35	95	32	1	610	68.1	8.31	2	High	0	338.71	35
FALSE	Master Protein	AT1G09640.1	Translation elongation factor EF1B, gamma chain	47.5845	18	89	9	1	414	46.6	5.48	0	High	0	337.86	18
FALSE	Master Protein	AT3G22960.1	Pyruvate kinase family protein	49.6644	21	88	21	1	596	65.1	5.92	0	High	0	337	21
FALSE	Master Protein	AT2G20990.1	synaptotagmin A	55.8226	29	93	29	1	541	61.7	7.56	0	High	0	336.31	29
FALSE	Master Protein	AT5G08530.1	51 kDa subunit of complex I	48.1481	20	84	20	1	486	53.4	8.16	0	High	0	336.08	20
FALSE	Master Protein	AT3G16640.1	translationally controlled tumor protein	62.5	10	86	10	1	168	18.9	4.64	0	High	0	335.83	10
FALSE	Master Protein	AT1G79530.1	glyceraldehyde-3-phosphate dehydrogenase of plastid 1	49.2891	17	85	11	1	422	44.8	8.63	5	High	0	335.69	17
FALSE	Master Protein	AT5G63890.2	histidinol dehydrogenase	40.5579	16	77	16	1	466	50.3	6.16	0	High	0	335.12	16
FALSE	Master Protein	AT1G44575.1	Chlorophyll A-B binding family protein	27.5472	8	84	8	1	265	28	9.26	0	High	0	334.89	8
FALSE	Master Protein	AT5G55660.1	DEK domain-containing chromatin associated protein	45.2442	37	94	37	1	778	87.2	4.81	0	High	0	334.72	37
FALSE	Master Protein	AT1G52360.2	Coatomer, beta' subunit	30.5155	26	87	8	1	970	109.7	4.96	18	High	0	334.55	26
FALSE	Master Protein	AT5G63420.1	RNA-metabolising metallo-beta-lactamase family protein	51.5917	42	102	42	1	911	100.5	8.22	0	High	0	334.38	42
FALSE	Master Protein	AT4G03280.1	photosynthetic electron transfer C	44.1048	7	71	7	1	229	24.4	8.54	0	High	0	333.58	7
FALSE	Master Protein	AT1G48860.1	RNA 3'-terminal phosphate cyclase/enolpyruvate transferase, alpha/beta	39.5393	20	92	6	1	521	55.8	6.79	0	High	0	333.29	20
FALSE	Master Protein	AT1G63000.1	nucleotide-rhamnose synthase/epimerase-reductase	50.4983	14	86	11	1	301	33.6	5.97	0	High	0	333.14	14
FALSE	Master Protein	AT4G01050.1	thylakoid rhodanese-like	29.3991	17	100	17	1	466	49.4	5.3	0	High	0	333.05	17
FALSE	Master Protein	AT1G48520.1	GLU-ADT subunit B	47.4545	25	91	25	1	550	60.9	7.62	0	High	0	332.87	25
FALSE	Master Protein	AT3G52150.1	RNA-binding (RRM/RBD/RNP motifs) family protein	43.8735	12	90	12	1	253	27.7	8.97	0	High	0	331.64	12
FALSE	Master Protein	AT5G42740.1	Sugar isomerase (SIS) family protein	50.8929	23	90	23	1	560	61.7	6.65	0	High	0	331.45	23
FALSE	Master Protein	AT5G08300.1	Succinyl-CoA ligase, alpha subunit	42.6513	13	88	6	1	347	36.1	8.27	9	High	0	330.3	13
FALSE	Master Protein	AT2G19940.2	oxidoreductases, acting on the aldehyde or oxo group of donors, NAD or NADP as acceptor;copper ion binding	53.3666	17	81	17	1	401	44.1	8.29	0	High	0	330	17
FALSE	Master Protein	AT1G76080.1	chloroplastic drought-induced stress protein of 32 kD	46.0265	14	88	14	1	302	33.7	8.46	0	High	0	329.95	14
FALSE	Master Protein	AT3G43300.1	HOPM interactor 7	29.4653	44	90	44	1	1758	194.9	5.58	0	High	0	328.94	44
FALSE	Master Protein	AT1G05260.1	Peroxidase superfamily protein	55.2147	13	73	11	1	326	34.9	8.4	1	High	0	328.55	13
FALSE	Master Protein	AT1G21670.1	LOCATED IN: cell wall, plant-type cell wall; EXPRESSED IN: 23 plant structures; EXPRESSED DURING: 14 growth stages; CONTAINS InterPro DOMAIN/s: WD40-like Beta Propeller (InterPro:IPR011659), Six-bladed beta-propeller, TolB-like (InterPro:IPR011042); BEST Arabidopsis thaliana protein match is: DPP6 N-terminal domain-like protein (TAIR:AT1G21680.1); Has 8461 Blast hits to 5060 proteins in 1257 spec…	48.0797	30	87	27	1	703	77.2	9.29	3	High	0	328.51	30
FALSE	Master Protein	AT1G53500.1	NAD-dependent epimerase/dehydratase family protein	49.6252	30	94	14	1	667	75.2	6.46	7	High	0	328.01	30
FALSE	Master Protein	AT1G08200.1	UDP-D-apiose/UDP-D-xylose synthase 2	58.0977	24	90	7	1	389	43.8	5.87	0	High	0	327.09	24
FALSE	Master Protein	AT3G18740.1	Ribosomal protein L7Ae/L30e/S12e/Gadd45 family protein	66.9643	9	86	2	1	112	12.3	9.69	9	High	0	326.94	9
FALSE	Master Protein	AT5G62530.1	aldehyde dehydrogenase 12A1	50.5396	23	85	23	1	556	61.7	6.73	0	High	0	326.69	23
FALSE	Master Protein	AT5G37830.1	oxoprolinase 1	32.7014	35	81	35	1	1266	137.4	5.86	0	High	0	325.92	35
FALSE	Master Protein	AT1G63660.1	GMP synthase (glutamine-hydrolyzing), putative / glutamine amidotransferase, putative	61.236	28	81	28	1	534	59.3	6.54	0	High	0	325.37	28
FALSE	Master Protein	AT1G01090.1	pyruvate dehydrogenase E1 alpha	55.6075	21	84	21	1	428	47.1	7.49	0	High	0	325.29	21
FALSE	Master Protein	AT2G19480.1	nucleosome assembly protein 1;2	52.2427	18	80	14	1	379	43.5	4.44	4	High	0	325.03	18
FALSE	Master Protein	AT5G24300.2	Glycogen/starch synthases, ADP-glucose type	46.1656	20	74	20	1	652	72.1	6.46	0	High	0	323.92	20
FALSE	Master Protein	AT5G26360.1	TCP-1/cpn60 chaperonin family protein	67.2072	33	89	33	1	555	60.3	5.77	0	High	0	323.87	33
FALSE	Master Protein	AT1G65980.1	thioredoxin-dependent peroxidase 1	46.2963	7	71	7	1	162	17.4	5.36	0	High	0	323.67	7
FALSE	Master Protein	AT1G74920.1	aldehyde dehydrogenase 10A8	54.491	17	68	16	1	501	54.4	5.29	1	High	0	323.29	17
FALSE	Master Protein	AT3G14390.1	Pyridoxal-dependent decarboxylase family protein	46.0744	22	81	6	1	484	53.5	6.98	17	High	0	323.28	22
FALSE	Master Protein	AT4G37800.1	xyloglucan endotransglucosylase/hydrolase 7	59.3857	13	72	12	1	293	33.7	7.4	1	High	0	323.21	13
FALSE	Master Protein	AT2G36390.1	starch branching enzyme 2.1	48.0186	34	87	27	1	858	97.6	5.62	0	High	0	323.12	34
FALSE	Master Protein	AT2G40660.1	Nucleic acid-binding, OB-fold-like protein	66.3239	23	90	23	1	389	42.1	7.4	0	High	0	323.05	23
FALSE	Master Protein	AT4G02480.1	AAA-type ATPase family protein	39.6838	38	80	26	1	1265	136.4	5.96	13	High	0	322.76	38
FALSE	Master Protein	AT5G11200.1	DEAD/DEAH box RNA helicase family protein	61.1241	23	87	23	1	427	48.3	5.64	0	High	0	322.59	23
FALSE	Master Protein	ATCG00500.1	acetyl-CoA carboxylase carboxyl transferase subunit beta	50.8197	22	84	22	1	488	55.6	6.24	0	High	0	322.46	22
FALSE	Master Protein	AT1G24300.1	GYF domain-containing protein	37.5251	43	83	1	1	1495	166.2	6.04	0	High	0	322.3	43
FALSE	Master Protein	AT1G48850.1	chorismate synthase, putative / 5-enolpyruvylshikimate-3-phosphate phospholyase, putative	43.1193	18	84	18	1	436	47.3	8.12	0	High	0	322.16	18
FALSE	Master Protein	AT5G55480.1	SHV3-like 1	22.3238	17	82	16	1	766	84.1	5.67	1	High	0	321.7	17
FALSE	Master Protein	AT4G39690.1	FUNCTIONS IN: molecular_function unknown; INVOLVED IN: biological_process unknown; LOCATED IN: mitochondrion; EXPRESSED IN: 26 plant structures; EXPRESSED DURING: 14 growth stages; CONTAINS InterPro DOMAIN/s: Mitochondrial inner membrane protein Mitofilin (InterPro:IPR019133); Has 30201 Blast hits to 17322 proteins in 780 species: Archae - 12; Bacteria - 1396; Metazoa - 17338; Fungi - 3422; Plant…	49.2308	26	83	26	1	650	70.5	5.2	0	High	0	321.44	26
FALSE	Master Protein	AT5G42390.1	Insulinase (Peptidase family M16) family protein	29.6443	30	86	30	1	1265	140.5	6.58	0	High	0	321.43	30
FALSE	Master Protein	AT2G43090.1	Aconitase/3-isopropylmalate dehydratase protein	60.9562	12	78	9	1	251	26.8	6.77	3	High	0	320.81	12
FALSE	Master Protein	AT5G20010.1	RAS-related nuclear protein-1	75.5656	14	84	14	1	221	25.3	6.86	0	High	0	320.53	14
FALSE	Master Protein	AT3G47800.1	Galactose mutarotase-like superfamily protein	45.2514	14	82	14	1	358	39.7	9.07	0	High	0	320.37	14
FALSE	Master Protein	AT5G63680.1	Pyruvate kinase family protein	51.9608	25	88	12	1	510	55	6.65	14	High	0	320.12	25
FALSE	Master Protein	AT5G20000.1	AAA-type ATPase family protein	58.4726	21	84	1	1	419	47.1	8.59	0	High	0	320	21
FALSE	Master Protein	AT1G64770.1	NDH-dependent cyclic electron flow 1	52.5862	15	78	15	1	348	38	6.79	0	High	0	319.73	15
FALSE	Master Protein	AT5G20980.1	methionine synthase 3	22.1675	17	79	11	1	812	90.5	8.05	0	High	0	319.38	17
FALSE	Master Protein	AT5G14040.1	phosphate transporter 3;1	44.8	17	91	17	1	375	40.1	9.2	0	High	0	318.37	17
FALSE	Master Protein	AT1G32990.1	plastid ribosomal protein l11	51.3514	10	83	10	1	222	23.1	9.66	0	High	0	318.02	10
FALSE	Master Protein	AT4G39200.1	Ribosomal protein S25 family protein	54.6296	8	89	1	1	108	12	10.7	0	High	0	317.64	8
FALSE	Master Protein	AT3G11910.1	ubiquitin-specific protease 13	41.6143	48	91	25	1	1115	130.6	5.58	23	High	0	317.64	48
FALSE	Master Protein	AT2G35410.1	RNA-binding (RRM/RBD/RNP motifs) family protein	52.2727	16	84	16	1	308	33.8	5.64	0	High	0	317.54	16
FALSE	Master Protein	AT3G27925.1	DegP protease 1	49.8861	17	76	17	1	439	46.6	6.46	0	High	0	317.26	17
FALSE	Master Protein	AT2G33340.1	MOS4-associated complex 3B	57.9048	23	80	20	1	525	56.7	6.13	3	High	0	316.88	23
FALSE	Master Protein	AT1G70820.1	phosphoglucomutase, putative / glucose phosphomutase, putative	43.252	23	82	23	1	615	67.3	5.94	0	High	0	316.25	23
FALSE	Master Protein	AT2G19730.3	Ribosomal L28e protein family	44.0559	10	81	8	1	143	15.9	10.58	2	High	0	315.51	10
FALSE	Master Protein	AT4G33510.1	3-deoxy-d-arabino-heptulosonate 7-phosphate synthase	49.1124	20	87	15	1	507	56.1	8.78	6	High	0	315.42	20
FALSE	Master Protein	AT3G02200.2	Proteasome component (PCI) domain protein	60.1918	19	71	17	1	417	46.8	5.12	2	High	0	314.45	19
FALSE	Master Protein	AT1G24300.2	GYF domain-containing protein	37.3154	43	82	1	1	1490	165.6	6.06	43	High	0	314.09	43
FALSE	Master Protein	AT2G36160.1	Ribosomal protein S11 family protein	48	9	73	1	1	150	16.2	10.59	12	High	0	314.06	9
FALSE	Master Protein	AT1G80070.1	Pre-mRNA-processing-splicing factor	23.9084	51	86	51	1	2359	275.3	8.79	0	High	0	313.59	51
FALSE	Master Protein	AT2G36250.1	Tubulin/FtsZ family protein	42.0502	16	73	12	1	478	50.7	5.71	4	High	0	313.5	16
FALSE	Master Protein	AT1G31230.1	aspartate kinase-homoserine dehydrogenase i	44.6762	37	85	33	1	911	99.3	6.77	4	High	0	313.1	37
FALSE	Master Protein	AT3G60245.1	Zinc-binding ribosomal protein family protein	53.2609	7	88	7	1	92	10.2	10.23	0	High	0	312.07	7
FALSE	Master Protein	AT1G23820.1	spermidine synthase 1	55.5556	16	77	12	1	378	41.7	5.17	4	High	0	312.01	16
FALSE	Master Protein	AT3G01190.1	Peroxidase superfamily protein	75.3894	20	81	18	1	321	34.9	8.95	4	High	0	310.04	20
FALSE	Master Protein	AT5G13120.1	cyclophilin 20-2	41.6988	11	88	10	1	259	28.3	9.31	0	High	0	309.85	11
FALSE	Master Protein	AT2G44060.1	Late embryogenesis abundant protein, group 2	68	22	82	22	1	325	36	4.84	0	High	0	309.74	22
FALSE	Master Protein	AT5G52520.1	Class II aaRS and biotin synthetases superfamily protein	52.302	24	80	24	1	543	60.7	7.02	0	High	0	309.65	24
FALSE	Master Protein	AT5G48230.2	acetoacetyl-CoA thiolase 2	64.7643	18	68	17	1	403	41.4	6.89	1	High	0	309.23	18
FALSE	Master Protein	AT5G27540.1	MIRO-related GTP-ase 1	57.0988	27	79	27	1	648	72.3	5.3	0	High	0	309.22	27
FALSE	Master Protein	AT3G11510.1	Ribosomal protein S11 family protein	48	9	72	1	1	150	16.3	10.59	0	High	0	308.92	9
FALSE	Master Protein	AT1G18540.1	Ribosomal protein L6 family protein	69.9571	22	90	8	1	233	26.1	10.1	0	High	0	308.68	22
FALSE	Master Protein	AT2G17200.1	ubiquitin family protein	41.7423	17	79	9	1	551	58	4.93	10	High	0	307.55	17
FALSE	Master Protein	AT4G30910.1	Cytosol aminopeptidase family protein	36.4888	17	72	7	1	581	61.3	6.7	0	High	0	307.52	17
FALSE	Master Protein	AT1G27430.1	GYF domain-containing protein	32.5737	40	82	28	1	1492	165.3	6.21	0	High	0	307.29	40
FALSE	Master Protein	AT1G03220.1	Eukaryotic aspartyl protease family protein	36.9515	16	85	10	1	433	45.7	8.66	6	High	0	307.29	16
FALSE	Master Protein	AT4G38710.1	glycine-rich protein	54.4248	23	77	23	1	452	49	5.14	0	High	0	306.91	23
FALSE	Master Protein	AT4G01310.1	Ribosomal L5P family protein	62.9771	17	89	17	1	262	28.3	9.99	0	High	0	306.7	17
FALSE	Master Protein	AT5G28500.1	unknown protein; FUNCTIONS IN: molecular_function unknown; INVOLVED IN: biological_process unknown; LOCATED IN: chloroplast stroma, chloroplast; EXPRESSED IN: 23 plant structures; EXPRESSED DURING: 13 growth stages; BEST Arabidopsis thaliana protein match is: unknown protein (TAIR:AT3G04550.1); Has 109 Blast hits to 109 proteins in 49 species: Archae - 0; Bacteria - 67; Metazoa - 0; Fungi - 0; Pl…	50.4608	23	77	23	1	434	48.2	5.07	0	High	0	305.74	23
FALSE	Master Protein	AT4G02450.1	HSP20-like chaperones superfamily protein	41.0788	13	86	13	1	241	25.5	4.54	0	High	0	305.41	13
FALSE	Master Protein	AT5G56350.1	Pyruvate kinase family protein	56.4257	21	79	11	1	498	54.4	6.86	6	High	0	305.25	21
FALSE	Master Protein	AT2G27020.1	20S proteasome alpha subunit G1	54.6185	15	86	15	1	249	27.4	6.32	0	High	0	305.19	15
FALSE	Master Protein	AT2G47940.1	DEGP protease 2	44.4811	22	78	22	1	607	66.8	6.05	0	High	0	305.02	22
FALSE	Master Protein	AT5G64040.1	photosystem I reaction center subunit PSI-N, chloroplast, putative / PSI-N, putative (PSAN)	34.5029	8	75	8	1	171	18.4	8.92	0	High	0	304.83	8
FALSE	Master Protein	AT1G15750.1	Transducin family protein / WD-40 repeat family protein	33.687	32	85	5	1	1131	124.2	7.24	2	High	0	304.77	32
FALSE	Master Protein	AT1G30690.2	Sec14p-like phosphatidylinositol transfer family protein	57.5926	31	78	31	1	540	61.2	4.92	0	High	0	304.65	31
FALSE	Master Protein	AT1G61580.1	R-protein L3 B	42.5641	18	87	7	1	390	44.5	10.11	0	High	0	304.46	18
FALSE	Master Protein	AT4G19710.2	aspartate kinase-homoserine dehydrogenase ii	36.6812	30	84	26	1	916	100.2	7.49	0	High	0	303.66	30
FALSE	Master Protein	AT4G31180.2	Class II aminoacyl-tRNA and biotin synthetases superfamily protein	52.6882	31	84	25	1	558	62.9	6.23	6	High	0	303.56	31
FALSE	Master Protein	AT1G67230.1	little nuclei1	38.9576	46	88	44	1	1132	129	5.3	1	High	0	303.55	46
FALSE	Master Protein	AT1G72330.3	alanine aminotransferase 2	39.9638	21	82	13	1	553	61	6.89	0	High	0	303.34	21
FALSE	Master Protein	AT5G63980.1	Inositol monophosphatase family protein	56.7568	20	69	20	1	407	43.5	6.46	0	High	0	303.21	20
FALSE	Master Protein	AT5G20080.1	FAD/NAD(P)-binding oxidoreductase	57.9268	16	82	16	1	328	36	8.69	0	High	0	303.01	16
FALSE	Master Protein	AT3G55750.1	Ribosomal protein L35Ae family protein	59.4595	6	92	1	1	111	12.8	10.68	0	High	0	302.57	6
FALSE	Master Protein	AT1G47250.1	20S proteasome alpha subunit F2	61.0108	17	80	6	1	277	30.4	5.07	0	High	0	301.87	17
FALSE	Master Protein	AT4G34350.1	4-hydroxy-3-methylbut-2-enyl diphosphate reductase	53.0043	25	80	25	1	466	52.7	6.07	0	High	0	301.49	25
FALSE	Master Protein	AT5G47010.1	RNA helicase, putative	33.9713	33	74	33	1	1254	136.8	6.48	0	High	0	301.24	33
FALSE	Master Protein	AT2G43560.1	FKBP-like peptidyl-prolyl cis-trans isomerase family protein	45.2915	9	76	9	1	223	23.5	8.25	0	High	0	301.23	9
FALSE	Master Protein	AT1G17100.1	SOUL heme-binding family protein	43.1034	8	63	8	1	232	25.4	4.92	0	High	0	300.49	8
FALSE	Master Protein	AT4G23850.1	AMP-dependent synthetase and ligase family protein	45.045	30	82	28	1	666	74.5	5.87	2	High	0	300.04	30
FALSE	Master Protein	AT1G04080.3	Tetratricopeptide repeat (TPR)-like superfamily protein	34.0219	26	78	26	1	823	91.1	4.98	0	High	0	299.23	26
FALSE	Master Protein	AT2G22125.1	binding	24	40	77	40	1	2150	230.6	5.33	0	High	0	299.22	40
FALSE	Master Protein	AT1G70310.1	spermidine synthase 2	60.5882	15	71	11	1	340	37.1	4.84	0	High	0	299.04	15
FALSE	Master Protein	AT2G22795.1	unknown protein; BEST Arabidopsis thaliana protein match is: unknown protein (TAIR:AT4G37820.1); Has 799854 Blast hits to 188815 proteins in 4452 species: Archae - 4529; Bacteria - 144236; Metazoa - 287749; Fungi - 87083; Plants - 43826; Viruses - 3662; Other Eukaryotes - 228769 (source: NCBI BLink).	60.6267	38	77	38	1	734	82	4.34	0	High	0	299.01	38
FALSE	Master Protein	AT4G04040.1	Phosphofructokinase family protein	39.8946	20	84	10	1	569	62.7	5.6	0	High	0	298.94	20
FALSE	Master Protein	AT2G30490.1	cinnamate-4-hydroxylase	41.5842	22	79	22	1	505	57.8	8.78	0	High	0	298.87	22
FALSE	Master Protein	AT1G12240.1	Glycosyl hydrolases family 32 protein	32.3795	17	77	14	1	664	73.8	5.63	3	High	0	298.62	17
FALSE	Master Protein	AT3G57490.1	Ribosomal protein S5 family protein	46.3768	14	84	2	1	276	30.1	10.18	0	High	0	297.92	14
FALSE	Master Protein	AT3G49680.1	branched-chain aminotransferase 3	43.5835	15	77	10	1	413	44.9	8.1	5	High	0	297.59	15
FALSE	Master Protein	AT4G39080.1	vacuolar proton ATPase A3	32.5213	24	75	16	1	821	92.8	5.94	8	High	0	297.52	24
FALSE	Master Protein	AT5G05010.2	clathrin adaptor complexes medium subunit family protein	41.1765	17	79	17	1	527	57.7	5.85	0	High	0	295.99	17
FALSE	Master Protein	AT3G53580.1	diaminopimelate epimerase family protein	51.6575	17	81	17	1	362	39	5.68	0	High	0	295.85	17
FALSE	Master Protein	AT1G06410.1	trehalose-phosphatase/synthase 7	44.3008	31	75	27	1	851	96.6	5.85	4	High	0	295.01	31
FALSE	Master Protein	AT1G21630.1	Calcium-binding EF hand family protein	40.6404	40	80	39	1	1218	131.8	5.63	1	High	0	294.74	40
FALSE	Master Protein	AT4G04770.1	ATP binding cassette protein 1	54.7576	24	77	24	1	557	61.8	6.86	0	High	0	294.69	24
FALSE	Master Protein	AT3G04870.2	zeta-carotene desaturase	43.0108	21	75	21	1	558	61.6	7.37	0	High	0	294.52	21
FALSE	Master Protein	AT5G57110.2	autoinhibited Ca2+ -ATPase, isoform 8	31.2849	30	76	27	1	1074	116.1	7.83	4	High	0	294.46	30
FALSE	Master Protein	AT3G49430.1	SER/ARG-rich protein 34A	49.6667	16	82	13	1	300	33.6	10.83	3	High	0	294.31	16
FALSE	Master Protein	AT4G26780.1	Co-chaperone GrpE family protein	54.4343	18	76	18	1	327	36.1	5.39	0	High	0	294.24	18
FALSE	Master Protein	AT2G27860.1	UDP-D-apiose/UDP-D-xylose synthase 1	56.0411	24	83	7	1	389	43.6	5.73	21	High	0	293.24	24
FALSE	Master Protein	AT5G18170.1	glutamate dehydrogenase 1	40.8759	16	70	11	1	411	44.5	6.86	6	High	0	293	16
FALSE	Master Protein	AT3G17810.1	pyrimidine 1	60.5634	20	73	20	1	426	46.8	6.8	0	High	0	292.96	20
FALSE	Master Protein	AT1G80490.2	TOPLESS-related 1	32.2321	33	83	7	1	1120	124	7.14	29	High	0	292.64	33
FALSE	Master Protein	AT5G10360.1	Ribosomal protein S6e	51.4056	14	75	5	1	249	28.1	10.83	0	High	0	292.64	14
FALSE	Master Protein	AT4G14570.1	acylaminoacyl-peptidase-related	38.3508	22	72	22	1	764	83.9	5.95	0	High	0	292.31	22
FALSE	Master Protein	AT5G27380.1	glutathione synthetase 2	52.1336	26	74	26	1	539	60.2	6.49	0	High	0	292.1	26
FALSE	Master Protein	AT5G46800.1	Mitochondrial substrate carrier family protein	53	13	70	13	1	300	31	9.52	0	High	0	291.74	13
FALSE	Master Protein	AT4G24830.1	arginosuccinate synthase family	43.5223	19	77	19	1	494	53.8	6.67	0	High	0	291.38	19
FALSE	Master Protein	AT2G06850.1	xyloglucan endotransglucosylase/hydrolase 4	51.6892	15	76	12	1	296	34.3	8.91	3	High	0	290.9	15
FALSE	Master Protein	AT5G67360.1	Subtilase family protein	27.4769	14	73	14	1	757	79.4	6.35	0	High	0	290.88	14
FALSE	Master Protein	AT5G64570.1	beta-D-xylosidase 4	37.5	22	72	20	1	784	84.3	7.66	0	High	0	290.8	22
FALSE	Master Protein	AT5G63860.1	Regulator of chromosome condensation (RCC1) family protein	62.5	19	73	19	1	440	47.1	5.74	0	High	0	290.58	19
FALSE	Master Protein	AT3G12290.1	Amino acid dehydrogenase family protein	82.6087	23	78	23	1	299	31.6	8.16	0	High	0	289.91	23
FALSE	Master Protein	AT1G74050.1	Ribosomal protein L6 family protein	72.5322	25	84	1	1	233	26.1	10.17	25	High	0	289.58	25
FALSE	Master Protein	AT1G33790.2	jacalin lectin family protein	44.698	26	65	26	1	745	81.8	6.65	0	High	0	289.56	26
FALSE	Master Protein	AT1G55860.1	ubiquitin-protein ligase 1	16.6412	50	82	19	1	3930	432.3	5.21	0	High	0	289.3	50
FALSE	Master Protein	AT3G15980.2	Coatomer, beta' subunit	34.3137	26	72	9	1	918	103.3	4.91	0	High	0	289.22	26
FALSE	Master Protein	AT2G14170.1	aldehyde dehydrogenase 6B2	32.4547	15	71	15	1	607	65.9	8.59	0	High	0	288.79	15
FALSE	Master Protein	AT1G66430.1	pfkB-like carbohydrate kinase family protein	53.125	19	82	18	1	384	41.4	5.77	1	High	0	288.65	19
FALSE	Master Protein	AT1G15980.1	NDH-dependent cyclic electron flow 1	47.0716	18	83	18	1	461	51	6.93	0	High	0	288.11	18
FALSE	Master Protein	AT5G02240.1	NAD(P)-binding Rossmann-fold superfamily protein	59.2885	13	71	11	1	253	27.1	6.62	0	High	0	287.81	13
FALSE	Master Protein	AT1G15140.1	FAD/NAD(P)-binding oxidoreductase	42.7119	13	70	13	1	295	31.9	8	0	High	0	287.72	13
FALSE	Master Protein	AT5G06600.1	ubiquitin-specific protease 12	38.9785	39	79	16	1	1116	130.5	5.77	0	High	0	287.59	39
FALSE	Master Protein	AT5G64100.1	Peroxidase superfamily protein	54.9849	20	81	19	1	331	35.7	9.29	1	High	0	287.24	20
FALSE	Master Protein	AT5G11560.1	catalytics	36.6599	30	77	30	1	982	108.8	6.81	0	High	0	287.2	30
FALSE	Master Protein	AT1G74060.1	Ribosomal protein L6 family protein	72.5322	25	83	1	1	233	26	10.17	0	High	0	286.99	25
FALSE	Master Protein	AT2G04842.1	threonyl-tRNA synthetase, putative / threonine--tRNA ligase, putative	33.8462	20	75	20	1	650	74.7	6.93	0	High	0	286.97	20
FALSE	Master Protein	AT3G16480.1	mitochondrial processing peptidase alpha subunit	41.6834	17	78	8	1	499	54	6.48	0	High	0	286.87	17
FALSE	Master Protein	AT5G16715.1	ATP binding;valine-tRNA ligases;aminoacyl-tRNA ligases;nucleotide binding;ATP binding;aminoacyl-tRNA ligases	31.0062	31	80	30	1	974	110.6	6.37	0	High	0	286.86	31
FALSE	Master Protein	AT3G08940.2	light harvesting complex photosystem II	41.4634	13	84	6	1	287	31.2	6.24	7	High	0	286.86	13
FALSE	Master Protein	AT5G16730.1	Plant protein of unknown function (DUF827)	45.4865	38	80	37	1	853	96.2	4.94	0	High	0	286.63	38
FALSE	Master Protein	AT1G48610.1	AT hook motif-containing protein	69.3396	12	63	12	1	212	21.7	11.41	0	High	0	286.41	12
FALSE	Master Protein	AT1G20760.1	Calcium-binding EF hand family protein	33.9549	33	76	33	1	1019	109.8	5.12	0	High	0	286.15	33
FALSE	Master Protein	AT1G20970.1	FUNCTIONS IN: molecular_function unknown; INVOLVED IN: biological_process unknown; LOCATED IN: plasma membrane, vacuole; EXPRESSED IN: guard cell, cultured cell; BEST Arabidopsis thaliana protein match is: proton pump interactor 1 (TAIR:AT4G27500.1); Has 30201 Blast hits to 17322 proteins in 780 species: Archae - 12; Bacteria - 1396; Metazoa - 17338; Fungi - 3422; Plants - 5037; Viruses - 0; Othe…	35.7771	38	74	38	1	1364	150.1	4.75	0	High	0	285.88	38
FALSE	Master Protein	AT2G43910.2	HARMLESS TO OZONE LAYER 1	61.3821	10	70	10	1	246	27.4	4.64	0	High	0	285.72	10
FALSE	Master Protein	AT1G11580.1	methylesterase PCR A	29.623	14	67	14	1	557	61.6	8.78	0	High	0	285.29	14
FALSE	Master Protein	AT3G11250.1	Ribosomal protein L10 family protein	41.4861	11	80	3	1	323	34.4	5.15	0	High	0	284.74	11
FALSE	Master Protein	AT1G63680.1	acid-amino acid ligases;ligases;ATP binding;ATP binding;ligases	46.114	25	71	25	1	772	85.5	4.69	0	High	0	284.72	25
FALSE	Master Protein	AT5G20630.1	germin 3	28.436	4	71	4	1	211	21.8	6.76	0	High	0	284.56	4
FALSE	Master Protein	AT4G39660.1	alanine:glyoxylate aminotransferase 2	50.8403	20	70	20	1	476	51.9	7.85	0	High	0	284.27	20
FALSE	Master Protein	AT1G80410.2	tetratricopeptide repeat (TPR)-containing protein	41.6026	36	78	36	1	911	103.9	7.78	0	High	0	284.09	36
FALSE	Master Protein	AT5G23890.1	LOCATED IN: mitochondrion, chloroplast thylakoid membrane, chloroplast, plastid, chloroplast envelope; EXPRESSED IN: 24 plant structures; EXPRESSED DURING: 14 growth stages; CONTAINS InterPro DOMAIN/s: S-layer homology domain (InterPro:IPR001119); BEST Arabidopsis thaliana protein match is: unknown protein (TAIR:AT5G52410.2); Has 1807 Blast hits to 1807 proteins in 277 species: Archae - 0; Bacter…	29.9154	26	75	25	1	946	103.9	4.69	1	High	0	284.02	26
FALSE	Master Protein	AT2G27600.1	AAA-type ATPase family protein	67.3563	24	73	24	1	435	48.6	6.96	0	High	0	283.96	24
FALSE	Master Protein	AT4G38630.1	regulatory particle non-ATPase 10	34.9741	17	74	17	1	386	40.7	4.6	0	High	0	283.75	17
FALSE	Master Protein	AT4G22240.1	Plastid-lipid associated protein PAP / fibrillin family protein	56.7742	13	67	12	1	310	33.6	5.83	0	High	0	283.38	13
FALSE	Master Protein	AT2G18110.1	Translation elongation factor EF1B/ribosomal protein S6 family protein	66.6667	12	72	6	1	231	25.3	4.6	1	High	0	283.15	12
FALSE	Master Protein	AT4G32720.1	La protein 1	49.1917	20	74	20	1	433	48.1	5.17	0	High	0	283.06	20
FALSE	Master Protein	AT3G10650.1	BEST Arabidopsis thaliana protein match is: nucleoporin-related (TAIR:AT5G20200.1); Has 61042 Blast hits to 31782 proteins in 2093 species: Archae - 202; Bacteria - 16480; Metazoa - 16017; Fungi - 12552; Plants - 1653; Viruses - 629; Other Eukaryotes - 13509 (source: NCBI BLink).	30.8633	33	79	33	1	1309	135.9	9.45	0	High	0	282.93	33
FALSE	Master Protein	AT4G26690.1	PLC-like phosphodiesterase family protein	19.4993	14	76	13	1	759	82.5	5.54	0	High	0	282.18	14
FALSE	Master Protein	AT4G39980.1	3-deoxy-D-arabino-heptulosonate 7-phosphate synthase 1	41.7143	18	71	15	1	525	57.9	8.06	0	High	0	281.6	18
FALSE	Master Protein	AT3G52580.1	Ribosomal protein S11 family protein	46.6667	8	63	2	1	150	16.2	10.59	0	High	0	281.53	8
FALSE	Master Protein	AT2G17190.1	ubiquitin family protein	36.803	16	71	8	1	538	57.2	4.79	0	High	0	281.37	16
FALSE	Master Protein	AT4G16830.1	Hyaluronan / mRNA binding family	58.3099	19	76	17	1	355	37.4	8.06	0	High	0	281.36	19
FALSE	Master Protein	AT1G79040.1	photosystem II subunit R	37.1429	5	68	5	1	140	14.6	9.63	0	High	0	281.18	5
FALSE	Master Protein	AT5G63510.1	gamma carbonic anhydrase like 1	49.2063	9	72	4	1	252	27.6	8.78	6	High	0	280.4	9
FALSE	Master Protein	AT3G26400.1	eukaryotic translation initiation factor 4B1	65.6015	32	74	28	1	532	57.7	8.13	0	High	0	280.37	32
FALSE	Master Protein	AT1G09100.1	26S proteasome AAA-ATPase subunit RPT5B	42.0804	16	68	1	1	423	47	5.02	0	High	0	279.8	16
FALSE	Master Protein	AT3G02760.1	Class II aaRS and biotin synthetases superfamily protein	41.9026	37	82	37	1	883	97.5	6.42	0	High	0	279.75	37
FALSE	Master Protein	AT4G04910.1	AAA-type ATPase family protein	39.7574	26	68	26	1	742	81.4	6.1	0	High	0	279.27	26
FALSE	Master Protein	AT3G18035.1	winged-helix DNA-binding transcription factor family protein	30	14	56	14	1	480	51.5	9.94	0	High	0	279.15	14
FALSE	Master Protein	AT5G53620.2	unknown protein; INVOLVED IN: biological_process unknown; EXPRESSED IN: 23 plant structures; EXPRESSED DURING: 13 growth stages; Has 30201 Blast hits to 17322 proteins in 780 species: Archae - 12; Bacteria - 1396; Metazoa - 17338; Fungi - 3422; Plants - 5037; Viruses - 0; Other Eukaryotes - 2996 (source: NCBI BLink).	45.1613	26	72	26	1	682	76.3	5.83	0	High	0	279.09	26
FALSE	Master Protein	AT1G52510.1	alpha/beta-Hydrolases superfamily protein	48.1579	14	66	14	1	380	41.8	7.05	0	High	0	278.48	14
FALSE	Master Protein	AT1G23290.1	Ribosomal protein L18e/L15 superfamily protein	53.4247	9	72	9	1	146	16.3	10.51	0	High	0	277.83	9
FALSE	Master Protein	AT2G37040.1	PHE ammonia lyase 1	48.1379	30	74	17	1	725	78.7	6.3	13	High	0	277.71	30
FALSE	Master Protein	AT5G23010.1	methylthioalkylmalate synthase 1	39.3281	18	67	15	1	506	55.1	7.25	0	High	0	277.18	18
FALSE	Master Protein	AT3G54470.1	uridine 5'-monophosphate synthase / UMP synthase (PYRE-F) (UMPS)	49.5798	21	70	20	1	476	51.8	7.23	1	High	0	277.02	21
FALSE	Master Protein	AT4G26910.3	Dihydrolipoamide succinyltransferase	45.7534	16	73	8	1	365	39.7	7.53	0	High	0	276.88	16
FALSE	Master Protein	AT4G34555.1	Ribosomal protein S25 family protein	54.6296	8	76	1	1	108	12	10.7	4	High	0	275.79	8
FALSE	Master Protein	AT4G17740.1	Peptidase S41 family protein	38.4466	17	72	17	1	515	55.7	8.79	0	High	0	275.73	17
FALSE	Master Protein	AT1G06220.2	Ribosomal protein S5/Elongation factor G/III/V family protein	37.7913	30	73	30	1	987	110.4	5.19	0	High	0	275.29	30
FALSE	Master Protein	AT1G18070.3	Translation elongation factor EF1A/initiation factor IF2gamma family protein	37.9374	25	79	25	1	543	60.5	5.31	0	High	0	275.07	25
FALSE	Master Protein	AT3G11710.1	lysyl-tRNA synthetase 1	43.4505	24	71	24	1	626	70.8	6.24	0	High	0	274.79	24
FALSE	Master Protein	AT4G31700.1	ribosomal protein S6	53.6	15	70	5	1	250	28.4	10.61	10	High	0	274.74	15
FALSE	Master Protein	AT5G13030.1	unknown protein; FUNCTIONS IN: molecular_function unknown; INVOLVED IN: biological_process unknown; LOCATED IN: chloroplast; EXPRESSED IN: 23 plant structures; EXPRESSED DURING: 13 growth stages; CONTAINS InterPro DOMAIN/s: Uncharacterised protein family UPF0061 (InterPro:IPR003846); Has 5046 Blast hits to 4997 proteins in 1211 species: Archae - 8; Bacteria - 2327; Metazoa - 120; Fungi - 134; Pla…	47.7093	28	73	28	1	633	71.1	6.7	0	High	0	274.62	28
FALSE	Master Protein	AT5G55070.1	Dihydrolipoamide succinyltransferase	31.4655	16	74	9	1	464	50.1	9.14	11	High	0	274.58	16
FALSE	Master Protein	AT3G14790.1	rhamnose biosynthesis 3	44.4277	27	81	10	1	664	74.9	6.55	0	High	0	274.46	27
FALSE	Master Protein	AT2G44920.2	Tetratricopeptide repeat (TPR)-like superfamily protein	50.4464	9	64	9	1	224	23.8	7.64	0	High	0	274.33	9
FALSE	Master Protein	AT1G08420.1	BRI1 suppressor 1 (BSU1)-like 2	33.4971	24	67	4	1	1018	108.5	5.74	0	High	0	274.03	24
FALSE	Master Protein	AT3G55610.1	delta 1-pyrroline-5-carboxylate synthase 2	41.4601	27	73	13	1	726	78.8	6.81	15	High	0	274.01	27
FALSE	Master Protein	AT2G28290.1	P-loop containing nucleoside triphosphate hydrolases superfamily protein	22.4398	54	75	54	1	3574	389.6	4.87	0	High	0	273.49	54
FALSE	Master Protein	AT1G08550.2	non-photochemical quenching 1	49.1342	21	70	21	1	462	52	5.29	0	High	0	273.34	21
FALSE	Master Protein	AT1G78060.1	Glycosyl hydrolase family protein	43.807	28	70	28	1	767	83.8	8.03	0	High	0	273.13	28
FALSE	Master Protein	AT1G10630.1	ADP-ribosylation factor A1F	74.0331	9	64	1	1	181	20.6	6.95	10	High	0	273.1	9
FALSE	Master Protein	AT5G10860.1	Cystathionine beta-synthase (CBS) family protein	67.4757	12	76	12	1	206	22.7	9.01	0	High	0	273.05	12
FALSE	Master Protein	AT2G22170.1	Lipase/lipooxygenase, PLAT/LH2 family protein	40.4372	6	67	5	1	183	20.1	5.31	0	High	0	272.89	6
FALSE	Master Protein	AT3G53430.1	Ribosomal protein L11 family protein	69.2771	10	74	1	1	166	18	8.97	0	High	0	272.5	10
FALSE	Master Protein	AT1G06290.1	acyl-CoA oxidase 3	41.9259	24	70	24	1	675	75.6	7.99	0	High	0	272.4	24
FALSE	Master Protein	AT2G26570.1	Plant protein of unknown function (DUF827)	46.2206	36	75	35	1	807	89.2	5.05	1	High	0	272.36	36
FALSE	Master Protein	AT1G71220.2	UDP-glucose:glycoprotein glucosyltransferases;transferases, transferring hexosyl groups;transferases, transferring glycosyl groups	24.969	36	76	36	1	1614	181.8	5.83	0	High	0	272.19	36
FALSE	Master Protein	AT5G49650.1	xylulose kinase-2	43.3692	22	69	22	1	558	61.3	5.53	0	High	0	272.18	22
FALSE	Master Protein	AT3G06860.1	multifunctional protein 2	49.2414	33	72	33	1	725	78.8	9.17	0	High	0	272.15	33
FALSE	Master Protein	AT4G26300.1	Arginyl-tRNA synthetase, class Ic	55.4517	32	70	23	1	642	72.3	7.17	9	High	0	272.15	32
FALSE	Master Protein	AT5G08570.1	Pyruvate kinase family protein	42.9412	22	78	8	1	510	54.9	6.29	1	High	0	272.12	22
FALSE	Master Protein	AT3G04940.1	cysteine synthase D1	61.1111	16	70	11	1	324	34.3	5.34	1	High	0	272.03	16
FALSE	Master Protein	AT1G70490.1	Ras-related small GTP-binding family protein	74.0331	9	64	1	1	181	20.6	6.95	0	High	0	272.01	9
FALSE	Master Protein	AT1G01620.1	plasma membrane intrinsic protein 1C	26.5734	6	54	4	1	286	30.6	8.85	1	High	0	271.88	6
FALSE	Master Protein	AT3G22110.1	20S proteasome alpha subunit C1	70.4	16	72	16	1	250	27.5	7.11	0	High	0	271.85	16
FALSE	Master Protein	AT2G24820.1	translocon at the inner envelope membrane of chloroplasts 55-II	32.6531	15	74	15	1	539	60.6	8.69	0	High	0	271.54	15
FALSE	Master Protein	AT1G15210.1	pleiotropic drug resistance 7	21.9834	34	80	10	1	1442	162.5	7.9	0	High	0	271.06	34
FALSE	Master Protein	AT5G53140.1	Protein phosphatase 2C family protein	63.3333	22	74	22	1	420	45.8	5.1	0	High	0	270.63	22
FALSE	Master Protein	AT3G48110.1	glycine-tRNA ligases	34.2081	31	70	30	1	1067	119.7	5.97	1	High	0	270.51	31
FALSE	Master Protein	AT3G23700.1	Nucleic acid-binding proteins superfamily	53.0612	19	67	19	1	392	42.7	5.62	0	High	0	270.47	19
FALSE	Master Protein	AT4G33650.2	dynamin-related protein 3A	50.5562	37	76	29	1	809	89.7	6.44	8	High	0	270.35	37
FALSE	Master Protein	AT3G63520.1	carotenoid cleavage dioxygenase 1	51.487	27	74	27	1	538	60.9	6.49	0	High	0	270.13	27
FALSE	Master Protein	AT5G50950.1	FUMARASE 2	45.2941	19	61	9	1	510	55.7	7.36	0	High	0	270.12	19
FALSE	Master Protein	AT2G22360.1	DNAJ heat shock family protein	51.1312	22	77	13	1	442	47.7	9.11	10	High	0	269.96	22
FALSE	Master Protein	AT5G22880.1	histone B2	58.6207	10	79	4	1	145	15.7	10.05	1	High	0	269.9	10
FALSE	Master Protein	AT2G27100.1	C2H2 zinc-finger protein SERRATE (SE)	46.8056	34	73	34	1	720	81	8.38	0	High	0	269.72	34
FALSE	Master Protein	AT3G52500.1	Eukaryotic aspartyl protease family protein	39.0192	15	75	15	1	469	51	8.21	0	High	0	269.58	15
FALSE	Master Protein	AT1G11840.6	glyoxalase I homolog	36.9565	12	72	10	1	322	36.3	5.5	0	High	0	269.52	12
FALSE	Master Protein	AT2G27210.1	BRI1 suppressor 1 (BSU1)-like 3	37.8728	25	64	5	1	1006	107.5	5.76	19	High	0	269.39	25
FALSE	Master Protein	AT1G17650.1	glyoxylate reductase 2	60.3352	14	64	14	1	358	37.8	8.44	0	High	0	269.31	14
FALSE	Master Protein	AT1G07670.1	endomembrane-type CA-ATPase 4	37.8888	35	71	12	1	1061	116.1	5.21	23	High	0	269.01	35
FALSE	Master Protein	AT5G49810.1	methionine S-methyltransferase	23.9963	21	69	21	1	1071	118.6	5.63	0	High	0	268.98	21
FALSE	Master Protein	AT1G62640.2	3-ketoacyl-acyl carrier protein synthase III	44.3069	15	64	15	1	404	42.8	7.36	0	High	0	268.94	15
FALSE	Master Protein	AT3G14210.1	epithiospecifier modifier 1	35.9694	11	60	11	1	392	44	7.72	0	High	0	268.56	11
FALSE	Master Protein	AT2G42520.1	P-loop containing nucleoside triphosphate hydrolases superfamily protein	44.0758	24	72	10	1	633	67.6	7.11	4	High	0	268.54	24
FALSE	Master Protein	AT3G58140.1	phenylalanyl-tRNA synthetase class IIc family protein	55.0117	25	76	25	1	429	49.2	6.4	0	High	0	268.2	25
FALSE	Master Protein	AT3G12390.1	Nascent polypeptide-associated complex (NAC), alpha subunit family protein	57.1429	8	68	5	1	203	22	4.48	3	High	0	268.14	8
FALSE	Master Protein	AT5G59910.1	Histone superfamily protein	56	10	84	1	1	150	16.4	9.99	1	High	0	268.08	10
FALSE	Master Protein	AT5G65010.2	asparagine synthetase 2	41.7962	18	69	11	1	579	65.1	6.46	7	High	0	268.01	18
FALSE	Master Protein	AT1G19920.1	Pseudouridine synthase/archaeosine transglycosylase-like family protein	51.4706	23	75	20	1	476	53.6	6.61	3	High	0	267.47	23
FALSE	Master Protein	AT5G66420.2	LOCATED IN: cellular_component unknown; EXPRESSED IN: 23 plant structures; EXPRESSED DURING: 13 growth stages; CONTAINS InterPro DOMAIN/s: Uncharacterised conserved protein UCP033271 (InterPro:IPR008322), TIM-barrel signal transduction protein, predicted (InterPro:IPR009215); Has 1232 Blast hits to 1230 proteins in 311 species: Archae - 18; Bacteria - 959; Metazoa - 1; Fungi - 84; Plants - 42; Vi…	48.939	31	71	31	1	754	80.7	5.73	0	High	0	267.24	31
FALSE	Master Protein	AT2G25080.1	glutathione peroxidase 1	42.7966	8	73	5	1	236	26	9.38	0	High	0	266.82	8
FALSE	Master Protein	AT1G77180.1	chromatin protein family	54.323	28	73	28	1	613	69.4	9.17	0	High	0	266.7	28
FALSE	Master Protein	AT1G70770.1	Protein of unknown function DUF2359, transmembrane	42.459	26	71	22	1	610	66.8	8.88	4	High	0	266.64	26
FALSE	Master Protein	AT5G34850.1	purple acid phosphatase 26	43.3684	16	63	16	1	475	55	7.31	0	High	0	266.56	16
FALSE	Master Protein	AT1G72160.1	Sec14p-like phosphatidylinositol transfer family protein	51.8367	23	71	21	1	490	56.1	5.3	1	High	0	266.04	23
FALSE	Master Protein	AT1G73110.1	P-loop containing nucleoside triphosphate hydrolases superfamily protein	56.713	20	71	20	1	432	48.3	7.33	0	High	0	265.68	20
FALSE	Master Protein	AT4G38220.2	Peptidase M20/M25/M40 family protein	55.8891	19	71	19	1	433	48	6.35	0	High	0	265.13	19
FALSE	Master Protein	AT5G12950.1	Putative glycosyl hydrolase of unknown function (DUF1680)	37.5145	29	74	29	1	861	96.2	7.14	0	High	0	265.09	29
FALSE	Master Protein	AT1G04170.1	eukaryotic translation initiation factor 2 gamma subunit	44.086	18	66	18	1	465	50.8	8.76	0	High	0	264.43	18
FALSE	Master Protein	AT3G44340.1	clone eighty-four	29.927	27	70	22	1	1096	117.6	7.21	5	High	0	263.9	27
FALSE	Master Protein	AT3G14840.2	Leucine-rich repeat transmembrane protein kinase	34.6078	29	71	26	1	1020	112.2	6.19	3	High	0	263.82	29
FALSE	Master Protein	AT5G07340.2	Calreticulin family protein	36.6667	21	73	10	1	540	61.4	4.86	0	High	0	263.63	21
FALSE	Master Protein	AT1G58080.1	ATP phosphoribosyl transferase 1	40.3893	15	69	11	1	411	44.5	6.43	4	High	0	263.47	15
FALSE	Master Protein	AT5G14780.1	formate dehydrogenase	54.4271	20	74	20	1	384	42.4	7.5	0	High	0	263.37	20
FALSE	Master Protein	AT5G65750.1	2-oxoglutarate dehydrogenase, E1 component	37.2683	28	65	19	1	1025	116.3	7.3	0	High	0	263.27	28
FALSE	Master Protein	AT4G39960.1	Molecular chaperone Hsp40/DnaJ family protein	43.8479	21	75	12	1	447	48	9.06	0	High	0	262.97	21
FALSE	Master Protein	AT4G03080.1	BRI1 suppressor 1 (BSU1)-like 1	48.3541	34	70	30	1	881	96.1	6.35	5	High	0	262.96	34
FALSE	Master Protein	AT5G63840.1	Glycosyl hydrolases family 31 protein	38.6536	32	73	32	1	921	104.2	6.27	0	High	0	262.8	32
FALSE	Master Protein	AT4G25630.1	fibrillarin 2	45.3125	15	72	2	1	320	33.6	10.08	13	High	0	262.75	15
FALSE	Master Protein	AT1G76160.1	SKU5 similar 5	41.5896	18	70	12	1	541	60	8.4	6	High	0	261.89	18
FALSE	Master Protein	AT3G25690.2	Hydroxyproline-rich glycoprotein family protein	42.8287	37	69	37	1	1004	111.8	5.54	0	High	0	261.8	37
FALSE	Master Protein	AT3G13290.1	varicose-related	27.9851	33	73	23	1	1340	145.8	6.13	0	High	0	261.66	33
FALSE	Master Protein	AT3G13990.1	Kinase-related protein of unknown function (DUF1296)	39.2689	23	62	23	1	848	92.2	8.59	0	High	0	261.65	23
FALSE	Master Protein	AT3G01120.1	Pyridoxal phosphate (PLP)-dependent transferases superfamily protein	45.8259	19	71	19	1	563	59.9	6.87	0	High	0	261.43	19
FALSE	Master Protein	AT4G05390.1	root FNR 1	44.1799	18	80	11	1	378	42.4	8.6	0	High	0	260.65	18
FALSE	Master Protein	AT4G28470.1	26S proteasome regulatory subunit S2 1B	37.5982	29	71	14	1	891	97.9	5.21	0	High	0	260.59	29
FALSE	Master Protein	AT1G03230.1	Eukaryotic aspartyl protease family protein	45.8525	16	68	10	1	434	46.1	9.14	0	High	0	260.09	16
FALSE	Master Protein	AT5G52470.1	fibrillarin 1	46.7532	15	71	2	1	308	32.8	10.14	0	High	0	259.55	15
FALSE	Master Protein	AT5G01530.1	light harvesting complex photosystem II	36.2069	11	76	4	1	290	31.1	6.14	0	High	0	259.53	11
FALSE	Master Protein	AT5G46750.1	ARF-GAP domain 9	51.2438	16	65	13	1	402	43.5	8.32	3	High	0	259.27	16
FALSE	Master Protein	AT3G45980.1	Histone superfamily protein	56	10	80	1	1	150	16.4	10.02	0	High	0	259.24	10
FALSE	Master Protein	AT1G52400.1	beta glucosidase 18	42.6136	18	73	16	1	528	60.4	7.21	0	High	0	259.11	18
FALSE	Master Protein	AT1G18450.1	actin-related protein 4	71.2018	24	65	24	1	441	48.9	5.35	0	High	0	258.92	24
FALSE	Master Protein	AT3G06580.1	Mevalonate/galactokinase family protein	51.6129	21	65	21	1	496	54.3	5.96	0	High	0	258.43	21
FALSE	Master Protein	AT5G16570.1	glutamine synthetase 1;4	17.1348	8	56	1	1	356	39	5.29	0	High	0	258.39	8
FALSE	Master Protein	AT3G58570.1	P-loop containing nucleoside triphosphate hydrolases superfamily protein	36.5325	21	69	7	1	646	69.2	7.81	0	High	0	258.26	21
FALSE	Master Protein	AT3G14290.1	20S proteasome alpha subunit E2	66.2447	12	61	1	1	237	26	4.75	0	High	0	258.21	12
FALSE	Master Protein	AT3G46030.1	Histone superfamily protein	54.4828	10	80	1	1	145	15.9	10.02	10	High	0	258.11	10
FALSE	Master Protein	AT2G19760.1	profilin 1	69.4656	9	61	7	1	131	14.3	4.82	2	High	0	258.04	9
FALSE	Master Protein	AT5G47690.3	binding	26.8202	42	78	42	1	1607	181.3	6.2	0	High	0	257.97	42
FALSE	Master Protein	AT1G15820.1	light harvesting complex photosystem II subunit 6	36.4341	12	71	12	1	258	27.5	7.4	0	High	0	257.9	12
FALSE	Master Protein	AT2G21060.1	glycine-rich protein 2B	67.1642	8	59	6	1	201	19.1	6.76	3	High	0	257.7	8
FALSE	Master Protein	AT4G22670.1	HSP70-interacting protein 1	39.9093	20	76	19	1	441	46.6	4.93	1	High	0	257.66	20
FALSE	Master Protein	AT1G53850.2	20S proteasome alpha subunit E1	66.2447	12	61	1	1	237	25.9	4.75	13	High	0	257	12
FALSE	Master Protein	AT4G16760.1	acyl-CoA oxidase 1	43.8253	30	72	26	1	664	74.3	7.66	4	High	0	256.92	30
FALSE	Master Protein	AT3G48680.1	gamma carbonic anhydrase-like 2	45.3125	8	66	3	1	256	27.9	8.68	0	High	0	256.57	8
FALSE	Master Protein	AT3G51550.1	Malectin/receptor-like protein kinase family protein	32.8492	24	69	21	1	895	98.1	6.2	3	High	0	256.36	24
FALSE	Master Protein	AT1G65440.1	global transcription factor group B1	27.3831	39	68	39	1	1647	184.9	5.22	0	High	0	256.23	39
FALSE	Master Protein	AT2G37190.1	Ribosomal protein L11 family protein	69.2771	10	70	1	1	166	17.9	8.97	9	High	0	255.79	10
FALSE	Master Protein	AT3G13750.1	beta galactosidase 1	35.183	25	73	23	1	847	93.6	8.53	2	High	0	255.57	25
FALSE	Master Protein	AT5G03740.1	histone deacetylase 2C	60.2041	16	70	16	1	294	31.8	4.89	0	High	0	255.36	16
FALSE	Master Protein	AT1G12800.1	Nucleic acid-binding, OB-fold-like protein	41.3299	28	70	28	1	767	85.6	5.35	0	High	0	255.29	28
FALSE	Master Protein	AT5G56680.1	Class II aminoacyl-tRNA and biotin synthetases superfamily protein	37.9371	22	74	18	1	572	63.7	5.58	5	High	0	255.11	22
FALSE	Master Protein	AT1G13950.1	eukaryotic elongation factor 5A-1	41.1392	7	61	3	1	158	17.4	5.76	0	High	0	255.05	7
FALSE	Master Protein	AT3G05350.1	Metallopeptidase M24 family protein	34.9296	17	61	17	1	710	78.7	6.54	0	High	0	254.55	17
FALSE	Master Protein	AT1G24360.1	NAD(P)-binding Rossmann-fold superfamily protein	42.9467	12	69	12	1	319	33.5	9.41	0	High	0	254.53	12
FALSE	Master Protein	AT3G52200.2	Dihydrolipoamide acetyltransferase, long form protein	34.2216	20	62	20	1	713	77.8	6.21	0	High	0	254.52	20
FALSE	Master Protein	AT2G40060.1	Clathrin light chain protein	50.3876	17	75	17	1	258	28.8	4.98	0	High	0	254.36	17
FALSE	Master Protein	AT3G50590.1	Transducin/WD40 repeat-like superfamily protein	28.8724	36	69	36	1	1614	176.2	8.32	0	High	0	254.3	36
FALSE	Master Protein	AT4G25340.1	FK506 BINDING PROTEIN 53	41.7191	22	60	22	1	477	52.2	5.05	0	High	0	254.2	22
FALSE	Master Protein	AT3G29185.1	Domain of unknown function (DUF3598)	56.8182	19	62	19	1	396	44.6	5.38	0	High	0	253.74	19
FALSE	Master Protein	AT3G44330.1	INVOLVED IN: protein processing; LOCATED IN: mitochondrion, endoplasmic reticulum, plasma membrane, vacuole; EXPRESSED IN: 25 plant structures; EXPRESSED DURING: 13 growth stages; CONTAINS InterPro DOMAIN/s: Nicalin (InterPro:IPR016574), EF-Hand 1, calcium-binding site (InterPro:IPR018247), Nicastrin (InterPro:IPR008710); Has 245 Blast hits to 243 proteins in 99 species: Archae - 6; Bacteria - 10…	42.3009	18	61	18	1	565	62.2	6.42	0	High	0	253.32	18
FALSE	Master Protein	AT4G29350.1	profilin 2	58.7786	7	63	5	1	131	14	5.02	0	High	0	253.21	7
FALSE	Master Protein	AT2G18450.1	succinate dehydrogenase 1-2	25.4747	12	59	2	1	632	69.3	6.27	0	High	0	253.2	12
FALSE	Master Protein	AT4G29130.1	hexokinase 1	54.6371	20	69	14	1	496	53.7	6.1	6	High	0	253.06	20
FALSE	Master Protein	AT1G78860.1	D-mannose binding lectin protein with Apple-like carbohydrate-binding domain	36.1174	15	68	4	1	443	49.2	6.28	0	High	0	252.39	15
FALSE	Master Protein	AT5G46390.2	Peptidase S41 family protein	53.9877	24	67	24	1	489	53	5.41	0	High	0	252.16	24
FALSE	Master Protein	AT5G23250.1	Succinyl-CoA ligase, alpha subunit	34.8974	10	68	3	1	341	35.3	8.57	0	High	0	252.07	10
FALSE	Master Protein	AT1G05010.1	ethylene-forming enzyme	51.3932	15	69	11	1	323	36.7	5.36	3	High	0	252.06	15
FALSE	Master Protein	AT4G14360.2	S-adenosyl-L-methionine-dependent methyltransferases superfamily protein	49.5066	27	68	8	1	608	69.2	6.54	21	High	0	251.74	27
FALSE	Master Protein	AT3G55330.1	PsbP-like protein 1	30.8696	9	67	9	1	230	25.6	9.35	0	High	0	251.71	9
FALSE	Master Protein	AT4G21280.1	photosystem II subunit QA	50.2242	11	71	9	1	223	23.8	9.64	2	High	0	251.54	11
FALSE	Master Protein	AT4G37210.1	Tetratricopeptide repeat (TPR)-like superfamily protein	61.3821	22	59	22	1	492	52.2	4.39	0	High	0	251.42	22
FALSE	Master Protein	AT2G27680.1	NAD(P)-linked oxidoreductase superfamily protein	46.6146	18	63	18	1	384	43.1	8.12	0	High	0	251.37	18
FALSE	Master Protein	AT4G17100.1	CONTAINS InterPro DOMAIN/s: Endoribonuclease XendoU (InterPro:IPR018998); Has 943 Blast hits to 770 proteins in 162 species: Archae - 0; Bacteria - 61; Metazoa - 472; Fungi - 40; Plants - 78; Viruses - 35; Other Eukaryotes - 257 (source: NCBI BLink).	44.9309	21	65	21	1	434	49.4	5	0	High	0	251.24	21
FALSE	Master Protein	AT5G25460.1	Protein of unknown function, DUF642	41.4634	14	69	8	1	369	40	7.36	0	High	0	251.23	14
FALSE	Master Protein	AT1G64790.1	ILITYHIA	21.7241	48	75	48	1	2610	284.6	7.17	0	High	0	251.13	48
FALSE	Master Protein	AT5G22780.1	Adaptor protein complex AP-2, alpha subunit	44.4225	35	70	4	1	1013	112.2	6.23	32	High	0	251.05	35
FALSE	Master Protein	AT2G25450.1	2-oxoglutarate (2OG) and Fe(II)-dependent oxygenase superfamily protein	40.39	14	69	14	1	359	40.3	6.29	0	High	0	250.95	14
FALSE	Master Protein	AT2G20760.1	Clathrin light chain protein	36.0947	14	66	13	1	338	37.2	6.24	1	High	0	250.9	14
FALSE	Master Protein	AT1G48410.3	Stabilizer of iron transporter SufD / Polynucleotidyl transferase	31.1429	30	70	30	1	1050	116.4	9.32	0	High	0	250.43	30
FALSE	Master Protein	AT1G15930.2	Ribosomal protein L7Ae/L30e/S12e/Gadd45 family protein	59.7222	10	63	7	1	144	15.4	5.55	3	High	0	250.34	10
FALSE	Master Protein	AT3G07100.1	Sec23/Sec24 protein transport family protein	32.3699	28	69	28	1	1038	113.9	7.91	0	High	0	250.24	28
FALSE	Master Protein	AT5G56360.1	calmodulin-binding protein	45.4405	24	68	24	1	647	73.2	4.79	0	High	0	250.19	24
FALSE	Master Protein	AT5G20950.1	Glycosyl hydrolase family protein	37.6603	20	68	17	1	624	67.9	9.13	3	High	0	250.19	20
FALSE	Master Protein	AT5G67030.1	zeaxanthin epoxidase (ZEP) (ABA1)	40.1799	25	69	25	1	667	73.8	7.03	0	High	0	250.07	25
FALSE	Master Protein	AT3G15610.1	Transducin/WD40 repeat-like superfamily protein	60.9971	19	64	7	1	341	37.3	6.47	0	High	0	250	19
FALSE	Master Protein	AT4G30270.1	xyloglucan endotransglucosylase/hydrolase 24	45.7249	11	67	9	1	269	30.7	8.31	2	High	0	249.85	11
FALSE	Master Protein	AT5G19620.1	outer envelope protein of 80 kDa	40.3005	24	69	24	1	732	79.9	8.16	0	High	0	249.85	24
FALSE	Master Protein	AT5G65720.1	nitrogen fixation S (NIFS)-like 1	54.3046	20	61	20	1	453	50.3	6.99	0	High	0	249.81	20
FALSE	Master Protein	AT3G23300.1	S-adenosyl-L-methionine-dependent methyltransferases superfamily protein	46.8085	26	69	6	1	611	69.3	6.73	0	High	0	249.77	26
FALSE	Master Protein	AT3G56940.1	dicarboxylate diiron protein, putative (Crd1)	41.8093	16	63	16	1	409	47.6	8.38	0	High	0	249.73	16
FALSE	Master Protein	AT5G48880.3	peroxisomal 3-keto-acyl-CoA thiolase 2	44.8578	16	64	14	1	457	47.9	7.4	1	High	0	249.72	16
FALSE	Master Protein	AT4G36020.1	cold shock domain protein 1	59.8662	13	55	13	1	299	30.1	7.84	0	High	0	249.66	13
FALSE	Master Protein	AT1G54780.1	thylakoid lumen 18.3 kDa protein	32.6316	12	64	12	1	285	31.1	8.84	0	High	0	249.37	12
FALSE	Master Protein	AT3G45780.2	phototropin 1	37.8514	31	68	30	1	996	111.6	7.65	1	High	0	249.15	31
FALSE	Master Protein	AT4G13850.1	glycine-rich RNA-binding protein 2	65.1899	5	53	5	1	158	15.7	7.34	0	High	0	249.15	5
FALSE	Master Protein	AT3G20050.1	T-complex protein 1 alpha subunit	39.633	20	67	20	1	545	59.2	6.3	0	High	0	249.07	20
FALSE	Master Protein	AT1G52730.1	Transducin/WD40 repeat-like superfamily protein	64.723	20	65	8	1	343	37.7	6.32	13	High	0	248.82	20
FALSE	Master Protein	AT2G28720.1	Histone superfamily protein	52.9801	9	76	3	1	151	16.5	9.99	0	High	0	248.78	9
FALSE	Master Protein	AT1G14830.1	DYNAMIN-like 1C	59.4463	37	73	27	1	614	68.7	7.56	10	High	0	248.21	37
FALSE	Master Protein	AT5G58140.1	phototropin 2	33.6612	26	65	25	1	915	102.4	7.42	0	High	0	248.06	26
FALSE	Master Protein	AT3G06720.1	importin alpha isoform 1	59.9624	24	56	14	1	532	58.6	5.27	10	High	0	247.64	24
FALSE	Master Protein	AT4G35100.1	plasma membrane intrinsic protein 3	21.4286	5	63	4	1	280	29.7	8.81	1	High	0	247.37	5
FALSE	Master Protein	AT5G06460.1	ubiquitin activating enzyme 2	36.3974	35	76	30	1	1077	119.5	5.29	0	High	0	247.06	35
FALSE	Master Protein	AT4G35790.1	phospholipase D delta	47.5806	38	68	38	1	868	98.9	7.17	0	High	0	246.77	38
FALSE	Master Protein	AT3G18860.1	transducin family protein / WD-40 repeat family protein	48.6842	30	59	30	1	760	84.2	5.58	0	High	0	246.73	30
FALSE	Master Protein	AT1G03090.2	methylcrotonyl-CoA carboxylase alpha chain, mitochondrial / 3-methylcrotonyl-CoA carboxylase 1 (MCCA)	44.0054	24	61	24	1	734	80.4	6.9	0	High	0	246.55	24
FALSE	Master Protein	AT5G55730.2	FASCICLIN-like arabinogalactan 1	30.1887	9	51	9	1	424	44.8	6.74	0	High	0	246.49	9
FALSE	Master Protein	AT1G52380.1	NUP50 (Nucleoporin 50 kDa) protein	60	22	64	22	1	440	46.6	4.92	0	High	0	246.32	22
FALSE	Master Protein	AT1G13060.1	20S proteasome beta subunit E1	67.5182	12	60	4	1	274	29.6	6.43	0	High	0	246.31	12
FALSE	Master Protein	AT2G21530.1	SMAD/FHA domain-containing protein	60.2871	9	61	9	1	209	22.7	7.88	0	High	0	246.04	9
FALSE	Master Protein	AT1G60710.1	NAD(P)-linked oxidoreductase superfamily protein	57.971	22	69	13	1	345	37.9	6.3	9	High	0	245.81	22
FALSE	Master Protein	AT1G07810.1	ER-type Ca2+-ATPase 1	38.9255	32	63	9	1	1061	116.3	5.11	0	High	0	245.65	32
FALSE	Master Protein	AT4G36760.1	aminopeptidase P1	44.186	24	63	24	1	645	71.9	5.31	0	High	0	245.62	24
FALSE	Master Protein	AT3G56130.1	biotin/lipoyl attachment domain-containing protein	61.9217	12	57	12	1	281	29.6	8.72	0	High	0	245.45	12
FALSE	Master Protein	AT1G76140.1	Prolyl oligopeptidase family protein	32.7044	23	67	23	1	795	89.3	5.85	0	High	0	245.41	23
FALSE	Master Protein	ATCG00800.1	structural constituent of ribosome	69.2661	20	72	20	1	218	25.2	9.48	0	High	0	245.19	20
FALSE	Master Protein	AT5G26860.1	lon protease 1	30.9574	26	61	26	1	940	103.9	5.59	0	High	0	245.15	26
FALSE	Master Protein	AT2G35840.1	Sucrose-6F-phosphate phosphohydrolase family protein	57.5829	24	64	23	1	422	47.8	6.6	1	High	0	245.01	24
FALSE	Master Protein	AT3G16000.1	MAR binding filament-like protein 1	43.1129	33	67	33	1	726	81.9	5.45	0	High	0	244.93	33
FALSE	Master Protein	AT5G58070.1	temperature-induced lipocalin	54.3011	10	64	10	1	186	21.4	6.35	0	High	0	244.19	10
FALSE	Master Protein	AT5G54500.1	flavodoxin-like quinone reductase 1	56.3725	9	54	6	1	204	21.8	6.38	5	High	0	244.17	9
FALSE	Master Protein	AT5G40650.1	succinate dehydrogenase 2-2	49.6429	14	66	3	1	280	31.1	8.62	0	High	0	243.9	14
FALSE	Master Protein	AT5G54810.1	tryptophan synthase beta-subunit 1	54.6809	22	64	10	1	470	50.9	6.84	13	High	0	243.37	22
FALSE	Master Protein	AT1G54340.1	isocitrate dehydrogenase	47.1154	18	69	11	1	416	47.2	7.71	0	High	0	242.82	18
FALSE	Master Protein	AT1G14610.1	valyl-tRNA synthetase / valine--tRNA ligase (VALRS)	34.2058	35	67	34	1	1108	125.8	7.11	1	High	0	242.8	35
FALSE	Master Protein	AT3G13235.1	ubiquitin family protein	60.1449	20	59	20	1	414	45.3	4.93	0	High	0	242.63	20
FALSE	Master Protein	AT4G11150.1	vacuolar ATP synthase subunit E1	67.8261	17	64	10	1	230	26	6.4	9	High	0	242.42	17
FALSE	Master Protein	AT1G80480.1	plastid transcriptionally active 17	42.7928	14	62	12	1	444	49.5	6.1	2	High	0	242.36	14
FALSE	Master Protein	AT3G01420.1	Peroxidase superfamily protein	50.8607	26	65	26	1	639	73.1	6.29	0	High	0	242.33	26
FALSE	Master Protein	AT4G31300.1	N-terminal nucleophile aminohydrolases (Ntn hydrolases) superfamily protein	57.0815	14	67	14	1	233	25.1	5.55	0	High	0	242.1	14
FALSE	Master Protein	AT5G65780.1	branched-chain amino acid aminotransferase 5 / branched-chain amino acid transaminase 5 (BCAT5)	33.7349	13	65	8	1	415	45.6	7.87	0	High	0	242	13
FALSE	Master Protein	AT4G13360.1	ATP-dependent caseinolytic (Clp) protease/crotonase family protein	49.4062	19	62	17	1	421	46.2	6.67	3	High	0	242	19
FALSE	Master Protein	AT5G26710.1	Glutamyl/glutaminyl-tRNA synthetase, class Ic	37.9694	31	72	31	1	719	81	7.03	0	High	0	241.86	31
FALSE	Master Protein	AT5G63810.1	beta-galactosidase 10	36.9771	22	71	20	1	741	83	8.4	1	High	0	241.48	22
FALSE	Master Protein	AT5G22770.1	alpha-adaptin	43.4783	34	67	3	1	1012	112.1	6.23	0	High	0	241.48	34
FALSE	Master Protein	AT3G08030.1	Protein of unknown function, DUF642	49.0411	15	65	15	1	365	39	7.56	0	High	0	241.47	15
FALSE	Master Protein	AT2G21130.1	Cyclophilin-like peptidyl-prolyl cis-trans isomerase family protein	83.3333	11	74	5	1	174	18.5	8.16	6	High	0	241.28	11
FALSE	Master Protein	AT3G02540.1	Rad23 UV excision repair protein family	38.9021	13	50	10	1	419	44.2	4.83	3	High	0	241.22	13
FALSE	Master Protein	AT2G41790.1	Insulinase (Peptidase family M16) family protein	31.2371	29	68	29	1	970	110.9	6.04	0	High	0	240.65	29
FALSE	Master Protein	AT3G60900.1	FASCICLIN-like arabinogalactan-protein 10	25.3555	9	64	5	1	422	43.6	5.82	0	High	0	240.41	9
FALSE	Master Protein	AT3G23750.1	Leucine-rich repeat protein kinase family protein	30.6034	21	61	20	1	928	99.9	5.72	1	High	0	240.38	21
FALSE	Master Protein	AT1G29150.1	non-ATPase subunit 9	54.1766	19	60	19	1	419	46.7	6.67	0	High	0	240.33	19
FALSE	Master Protein	AT1G07790.1	Histone superfamily protein	51.3514	9	72	2	1	148	16.4	10.05	1	High	0	239.87	9
FALSE	Master Protein	AT2G43100.1	isopropylmalate isomerase 2	57.0312	9	54	7	1	256	27	6.11	0	High	0	239.39	9
FALSE	Master Protein	AT2G34680.1	Outer arm dynein light chain 1 protein	30.2693	42	67	42	1	1708	186.7	6.24	0	High	0	239.33	42
FALSE	Master Protein	AT1G80460.1	Actin-like ATPase superfamily protein	44.8276	22	67	22	1	522	56.4	6.28	0	High	0	238.96	22
FALSE	Master Protein	AT3G27380.1	succinate dehydrogenase 2-1	56.9892	16	63	5	1	279	31.2	8.44	14	High	0	238.65	16
FALSE	Master Protein	AT1G66680.1	S-adenosyl-L-methionine-dependent methyltransferases superfamily protein	58.9385	16	59	16	1	358	39.2	4.6	0	High	0	238.63	16
FALSE	Master Protein	AT5G58290.1	regulatory particle triple-A ATPase 3	53.1863	19	64	18	1	408	45.7	5.6	0	High	0	238.57	19
FALSE	Master Protein	AT4G26500.1	chloroplast sulfur E	60.1078	18	59	18	1	371	40.8	5.64	0	High	0	238.32	18
FALSE	Master Protein	AT1G04710.1	peroxisomal 3-ketoacyl-CoA thiolase 4	47.4041	15	57	11	1	443	46.6	8.29	0	High	0	238.08	15
FALSE	Master Protein	AT2G25980.1	Mannose-binding lectin superfamily protein	56.1247	18	54	16	1	449	48.9	6.54	1	High	0	237.92	18
FALSE	Master Protein	AT4G16130.1	arabinose kinase	33.8787	27	64	27	1	1039	114.2	6.3	0	High	0	237.59	27
FALSE	Master Protein	AT4G36195.3	Serine carboxypeptidase S28 family protein	46.9262	21	60	20	1	488	54.7	6.52	1	High	0	237.5	21
FALSE	Master Protein	AT1G55020.1	lipoxygenase 1	35.2736	29	63	29	1	859	98	5.52	0	High	0	237.43	29
FALSE	Master Protein	AT1G14650.1	SWAP (Suppressor-of-White-APricot)/surp domain-containing protein / ubiquitin family protein	36.9427	25	63	25	1	785	87.5	5.15	0	High	0	237.19	25
FALSE	Master Protein	AT3G53420.1	plasma membrane intrinsic protein 2A	19.5122	6	60	3	1	287	30.5	8.4	3	High	0	236.98	6
FALSE	Master Protein	AT1G48620.1	high mobility group A5	43.4238	16	52	16	1	479	51.4	9.8	0	High	0	236.43	16
FALSE	Master Protein	AT4G31870.1	glutathione peroxidase 7	46.7811	9	68	6	1	233	25.8	9.51	1	High	0	236.26	9
FALSE	Master Protein	AT5G14220.1	Flavin containing amine oxidoreductase family	54.1339	23	57	23	1	508	55.6	8.22	0	High	0	236.19	23
FALSE	Master Protein	AT3G18000.1	S-adenosyl-L-methionine-dependent methyltransferases superfamily protein	48.4725	23	67	9	1	491	56.1	5.57	0	High	0	236.13	23
FALSE	Master Protein	AT4G11380.2	Adaptin family protein	36.2445	29	63	5	1	916	101.9	5.03	26	High	0	235.79	29
FALSE	Master Protein	AT2G07360.2	SH3 domain-containing protein	29.7997	32	67	32	1	1198	130.3	5.69	0	High	0	235.72	32
FALSE	Master Protein	AT4G08850.1	Leucine-rich repeat receptor-like protein kinase family protein	24.3062	20	59	20	1	1045	115.4	6.27	0	High	0	235.62	20
FALSE	Master Protein	AT3G05060.1	NOP56-like pre RNA processing ribonucleoprotein	40.3377	20	61	18	1	533	59	9.22	2	High	0	235.58	20
FALSE	Master Protein	AT1G51710.1	ubiquitin-specific protease 6	46.6805	19	60	16	1	482	53.7	6.2	4	High	0	235.32	19
FALSE	Master Protein	AT3G52850.1	vacuolar sorting receptor homolog 1	41.0915	25	68	22	1	623	68.9	6.28	1	High	0	235.29	25
FALSE	Master Protein	AT1G79990.1	structural molecules	25.7269	25	61	16	1	1135	128.6	5.08	0	High	0	235.05	25
FALSE	Master Protein	ATCG00170.1	DNA-directed RNA polymerase family protein	26.4535	34	68	34	1	1376	156.3	9.36	0	High	0	234.95	34
FALSE	Master Protein	AT5G04360.1	limit dextrinase	38.7565	29	62	29	1	965	107	6.38	0	High	0	234.79	29
FALSE	Master Protein	AT5G59090.1	subtilase 4.12	25	15	65	15	1	736	78	8.97	0	High	0	234.67	15
FALSE	Master Protein	AT4G23460.1	Adaptin family protein	33.1467	28	64	4	1	893	99	5.02	0	High	0	234.65	28
FALSE	Master Protein	AT3G07660.1	Kinase-related protein of unknown function (DUF1296)	28.6564	19	61	19	1	841	90	6.92	0	High	0	234.5	19
FALSE	Master Protein	AT4G38680.1	glycine rich protein 2	66.9951	7	49	5	1	203	19.1	5.92	0	High	0	234.31	7
FALSE	Master Protein	AT3G55400.1	methionyl-tRNA synthetase / methionine--tRNA ligase / MetRS (cpMetRS)	50.6494	25	61	25	1	616	69.2	6.57	0	High	0	234.31	25
FALSE	Master Protein	AT5G11420.1	Protein of unknown function, DUF642	38.5246	14	65	6	1	366	39.6	7.71	9	High	0	234.07	14
FALSE	Master Protein	ATCG00720.1	photosynthetic electron transfer B	25.1163	4	57	4	1	215	24.1	8.76	0	High	0	233.79	4
FALSE	Master Protein	AT1G76550.1	Phosphofructokinase family protein	49.5948	27	59	15	1	617	67.5	7.23	12	High	0	233.61	27
FALSE	Master Protein	AT5G13420.1	Aldolase-type TIM barrel family protein	42.9224	18	60	18	1	438	47.7	6.43	0	High	0	233.33	18
FALSE	Master Protein	AT4G34050.1	S-adenosyl-L-methionine-dependent methyltransferases superfamily protein	66.0232	12	59	12	1	259	29.1	5.29	0	High	0	232.94	12
FALSE	Master Protein	AT3G10690.1	DNA GYRASE A	34.5263	30	67	30	1	950	104.5	6.9	0	High	0	232.69	30
FALSE	Master Protein	AT5G24710.1	Transducin/WD40 repeat-like superfamily protein	29.557	34	62	34	1	1377	148	6.73	0	High	0	232.3	34
FALSE	Master Protein	AT5G09650.1	pyrophosphorylase 6	42.3333	12	61	12	1	300	33.4	6.01	0	High	0	232.23	12
FALSE	Master Protein	AT1G79830.4	golgin candidate 5	48.9754	43	65	43	1	976	110.7	4.88	0	High	0	231.98	43
FALSE	Master Protein	AT3G10920.1	manganese superoxide dismutase 1	57.1429	11	57	11	1	231	25.4	8.48	0	High	0	231.91	11
FALSE	Master Protein	AT4G11290.1	Peroxidase superfamily protein	47.8528	12	56	10	1	326	35.6	6.98	0	High	0	231.88	12
FALSE	Master Protein	AT2G21580.1	Ribosomal protein S25 family protein	54.6296	8	69	2	1	108	12.1	10.7	7	High	0	231.87	8
FALSE	Master Protein	AT5G06060.1	NAD(P)-binding Rossmann-fold superfamily protein	50.7576	13	58	11	1	264	28.3	7.69	2	High	0	231.73	13
FALSE	Master Protein	AT2G20630.1	PP2C induced by AVRRPM1	58.0645	16	63	12	1	279	30.5	6.14	4	High	0	231.54	16
FALSE	Master Protein	AT1G80380.2	P-loop containing nucleoside triphosphate hydrolases superfamily protein	38.3772	17	60	17	1	456	51	7.14	0	High	0	231.38	17
FALSE	Master Protein	AT1G20340.1	Cupredoxin superfamily protein	38.9222	2	44	2	1	167	17	5.2	0	High	0	231.27	2
FALSE	Master Protein	AT5G17170.1	rubredoxin family protein	46.8635	9	53	9	1	271	28.4	9.57	0	High	0	231.21	9
FALSE	Master Protein	AT1G10510.1	RNI-like superfamily protein	41.4876	20	61	19	1	605	64.7	7.58	1	High	0	231.07	20
FALSE	Master Protein	AT3G18080.1	B-S glucosidase 44	34.1797	20	63	19	1	512	58.9	9.42	1	High	0	230.87	20
FALSE	Master Protein	AT3G02260.1	auxin transport protein (BIG)	11.887	52	69	51	1	5098	567.5	5.95	1	High	0	230.79	52
FALSE	Master Protein	AT3G12050.1	Aha1 domain-containing protein	58.6111	17	58	17	1	360	40.2	5.9	0	High	0	230.52	17
FALSE	Master Protein	AT2G45810.1	DEA(D/H)-box RNA helicase family protein	50	19	55	10	1	528	60.4	7.59	9	High	0	230.48	19
FALSE	Master Protein	AT4G35260.1	isocitrate dehydrogenase 1	41.9619	15	62	9	1	367	39.6	8.13	6	High	0	230.11	15
FALSE	Master Protein	AT5G40480.1	embryo defective 3012	19.4488	36	66	36	1	1923	210.5	6.01	0	High	0	230.1	36
FALSE	Master Protein	AT3G19820.3	cell elongation protein / DWARF1 / DIMINUTO (DIM)	38.5027	21	62	21	1	561	65.4	7.97	0	High	0	229.71	21
FALSE	Master Protein	AT3G48690.1	alpha/beta-Hydrolases superfamily protein	53.7037	13	54	12	1	324	35.5	5.43	0	High	0	229.67	13
FALSE	Master Protein	AT1G30360.1	Early-responsive to dehydration stress protein (ERD4)	31.768	19	66	19	1	724	81.9	9.23	0	High	0	229.64	19
FALSE	Master Protein	AT1G18210.1	Calcium-binding EF-hand family protein	73.5294	11	53	11	1	170	18.3	4.35	0	High	0	229.62	11
FALSE	Master Protein	AT5G26260.1	TRAF-like family protein	56.9801	18	57	16	1	351	39.8	9.22	0	High	0	228.83	18
FALSE	Master Protein	AT1G56050.1	GTP-binding protein-related	47.981	14	53	14	1	421	45.6	5.97	0	High	0	228.66	14
FALSE	Master Protein	AT2G33040.1	gamma subunit of Mt ATP synthase	43.3846	14	58	14	1	325	35.4	8.9	0	High	0	228.49	14
FALSE	Master Protein	AT4G03520.1	Thioredoxin superfamily protein	44.086	7	58	7	1	186	20.3	9.22	0	High	0	228.37	7
FALSE	Master Protein	AT3G53710.2	ARF-GAP domain 6	54.6841	22	64	17	1	459	49.7	7.24	0	High	0	228.21	22
FALSE	Master Protein	AT3G49120.1	peroxidase CB	40.7932	12	63	5	1	353	38.8	7.64	4	High	0	228.17	12
FALSE	Master Protein	AT5G20920.3	eukaryotic translation initiation factor 2 beta subunit	56.7164	15	52	15	1	268	30.6	7.2	0	High	0	228.11	15
FALSE	Master Protein	AT1G24020.2	MLP-like protein 423	64.5161	10	63	10	1	155	17	5.2	0	High	0	227.97	10
FALSE	Master Protein	AT4G32640.2	Sec23/Sec24 protein transport family protein	26.0185	24	56	19	1	1080	116.2	7.87	0	High	0	227.8	24
FALSE	Master Protein	AT5G64030.1	S-adenosyl-L-methionine-dependent methyltransferases superfamily protein	42.7021	32	63	27	1	829	93	5.16	0	High	0	227.77	32
FALSE	Master Protein	AT5G36880.2	acetyl-CoA synthetase	34.7241	21	61	21	1	743	81.8	6.09	0	High	0	227.74	21
FALSE	Master Protein	AT1G06190.1	Rho termination factor	43.8903	20	65	3	1	401	44.5	5.19	18	High	0	227.65	20
FALSE	Master Protein	AT5G22620.3	phosphoglycerate/bisphosphoglycerate mutase family protein	55	20	54	20	1	460	50.8	7.46	0	High	0	227.63	20
FALSE	Master Protein	AT4G18030.1	S-adenosyl-L-methionine-dependent methyltransferases superfamily protein	54.9114	32	63	31	1	621	70.3	7.68	1	High	0	227.52	32
FALSE	Master Protein	AT2G22780.1	peroxisomal NAD-malate dehydrogenase 1	61.8644	15	52	14	1	354	37.4	7.96	0	High	0	227.45	15
FALSE	Master Protein	AT5G23740.1	ribosomal protein S11-beta	54.717	10	63	6	1	159	17.7	10.61	0	High	0	227.42	10
FALSE	Master Protein	AT4G31880.1	LOCATED IN: cytosol, chloroplast; EXPRESSED IN: 24 plant structures; EXPRESSED DURING: 14 growth stages; BEST Arabidopsis thaliana protein match is: Tudor/PWWP/MBT superfamily protein (TAIR:AT1G15940.1); Has 137162 Blast hits to 70781 proteins in 2973 species: Archae - 289; Bacteria - 24182; Metazoa - 56725; Fungi - 20130; Plants - 6559; Viruses - 758; Other Eukaryotes - 28519 (source: NCBI BLink…	38.0298	32	66	32	1	873	94.2	5.66	0	High	0	226.99	32
FALSE	Master Protein	AT5G17330.1	glutamate decarboxylase	31.6733	15	60	11	1	502	57	5.53	0	High	0	226.87	15
FALSE	Master Protein	AT2G05580.1	Glycine-rich protein family	64.9007	10	58	10	1	302	26	9.91	0	High	0	226.79	10
FALSE	Master Protein	AT1G41880.1	Ribosomal protein L35Ae family protein	59.4595	6	77	1	1	111	12.8	10.68	2	High	0	226.68	6
FALSE	Master Protein	AT2G37690.1	phosphoribosylaminoimidazole carboxylase, putative / AIR carboxylase, putative	41.7445	21	58	21	1	642	69.7	7.01	0	High	0	226.57	21
FALSE	Master Protein	AT2G47610.1	Ribosomal protein L7Ae/L30e/S12e/Gadd45 family protein	54.0856	19	71	4	1	257	29.1	10.13	15	High	0	226.48	19
FALSE	Master Protein	AT1G09795.1	ATP phosphoribosyl transferase 2	42.615	14	57	10	1	413	44.7	6.8	0	High	0	226.31	14
FALSE	Master Protein	AT5G16390.1	chloroplastic acetylcoenzyme A carboxylase 1	23.2143	7	70	5	1	280	29.6	9.06	2	High	0	226	7
FALSE	Master Protein	AT3G13870.1	Root hair defective 3 GTP-binding protein (RHD3)	40.2743	28	60	25	1	802	89	5.57	3	High	0	225.97	28
FALSE	Master Protein	AT3G26450.1	Polyketide cyclase/dehydrase and lipid transport superfamily protein	59.8684	11	63	5	1	152	17.8	5.15	10	High	0	225.86	11
FALSE	Master Protein	AT4G05420.1	damaged DNA binding protein 1A	26.8382	28	65	13	1	1088	121.2	5.29	15	High	0	225.31	28
FALSE	Master Protein	AT4G29120.1	6-phosphogluconate dehydrogenase family protein	57.1856	18	60	18	1	334	35.3	8.4	0	High	0	225.11	18
FALSE	Master Protein	AT4G04350.1	tRNA synthetase class I (I, L, M and V) family protein	42.0349	32	62	32	1	973	111	6.3	0	High	0	224.84	32
FALSE	Master Protein	AT3G63130.2	RAN GTPase activating protein 1	53.4579	24	57	24	1	535	58.8	4.72	0	High	0	224.77	24
FALSE	Master Protein	AT2G20190.1	CLIP-associated protein	28.0751	32	60	32	1	1439	158.9	7.14	0	High	0	224.45	32
FALSE	Master Protein	AT3G45300.1	isovaleryl-CoA-dehydrogenase	53.0562	17	53	17	1	409	44.7	7.53	0	High	0	224.4	17
FALSE	Master Protein	AT5G48480.1	Lactoylglutathione lyase / glyoxalase I family protein	60.241	12	67	12	1	166	17.5	4.88	0	High	0	224.28	12
FALSE	Master Protein	AT2G45960.3	plasma membrane intrinsic protein 1B	16.9435	5	49	2	1	301	32.4	8.51	2	High	0	224.27	5
FALSE	Master Protein	AT5G17710.2	Co-chaperone GrpE family protein	45.7055	13	58	13	1	326	35.7	4.59	0	High	0	224.01	13
FALSE	Master Protein	AT3G63410.1	S-adenosyl-L-methionine-dependent methyltransferases superfamily protein	45.5621	11	52	11	1	338	37.9	9.1	0	High	0	223.93	11
FALSE	Master Protein	AT2G27040.1	Argonaute family protein	35.9307	28	61	28	1	924	102.8	8.88	0	High	0	223.93	28
FALSE	Master Protein	AT1G52410.2	TSK-associating protein 1	44.9275	27	60	26	1	759	84.3	4.65	0	High	0	223.61	27
FALSE	Master Protein	AT4G33500.1	Protein phosphatase 2C family protein	40.1934	22	58	22	1	724	78.9	4.73	0	High	0	223.05	22
FALSE	Master Protein	AT1G75350.1	Ribosomal protein L31	55.5556	8	57	8	1	144	16	9.8	0	High	0	222.99	8
FALSE	Master Protein	AT3G19760.1	eukaryotic initiation factor 4A-III	58.8235	25	62	21	1	408	45.8	6.23	4	High	0	222.98	25
FALSE	Master Protein	AT1G50380.1	Prolyl oligopeptidase family protein	47.7465	28	61	28	1	710	80.9	5.81	0	High	0	222.83	28
FALSE	Master Protein	AT5G20280.1	sucrose phosphate synthase 1F	39.4056	35	63	28	1	1043	117.2	6.43	7	High	0	222.74	35
FALSE	Master Protein	AT1G54410.1	dehydrin family protein	65.3061	14	71	14	1	98	10.8	7.21	0	High	0	222.7	14
FALSE	Master Protein	AT3G03380.1	DegP protease 7	35.6427	33	62	33	1	1097	119.8	6.11	0	High	0	222.7	33
FALSE	Master Protein	AT2G22400.1	S-adenosyl-L-methionine-dependent methyltransferases superfamily protein	34.901	25	59	25	1	808	89.8	6.06	0	High	0	222.39	25
FALSE	Master Protein	AT2G30050.1	transducin family protein / WD-40 repeat family protein	81.1258	17	57	15	1	302	32.6	5.74	2	High	0	222.11	17
FALSE	Master Protein	AT4G13010.1	Oxidoreductase, zinc-binding dehydrogenase family protein	61.7021	15	57	15	1	329	34.4	8.95	0	High	0	222.05	15
FALSE	Master Protein	AT2G35490.1	Plastid-lipid associated protein PAP / fibrillin family protein	23.9362	9	65	9	1	376	40.5	4.55	0	High	0	222	9
FALSE	Master Protein	AT4G30800.1	Nucleic acid-binding, OB-fold-like protein	44.0252	8	63	3	1	159	17.9	10.73	0	High	0	221.74	8
FALSE	Master Protein	AT3G21770.1	Peroxidase superfamily protein	34.9544	10	56	8	1	329	35.8	9.66	0	High	0	221.59	10
FALSE	Master Protein	AT5G43780.1	Pseudouridine synthase/archaeosine transglycosylase-like family protein	45.629	19	64	10	1	469	52.1	8.87	1	High	0	221.55	19
FALSE	Master Protein	AT4G29010.1	Enoyl-CoA hydratase/isomerase family	38.6963	23	61	23	1	721	77.8	9.32	0	High	0	221.51	23
FALSE	Master Protein	AT1G21680.1	DPP6 N-terminal domain-like protein	35.4108	22	62	19	1	706	78.4	6.79	0	High	0	221.44	22
FALSE	Master Protein	AT5G05730.2	anthranilate synthase alpha subunit 1	40.0641	20	54	18	1	624	69.6	6.44	3	High	0	221.4	20
FALSE	Master Protein	AT2G37500.1	arginine biosynthesis protein ArgJ family	39.1026	15	51	15	1	468	48.7	6.65	0	High	0	221.05	15
FALSE	Master Protein	AT4G09320.1	Nucleoside diphosphate kinase family protein	33.1361	6	56	6	1	169	18.8	8.27	0	High	0	220.75	6
FALSE	Master Protein	AT1G25350.2	glutamine-tRNA ligase, putative / glutaminyl-tRNA synthetase, putative / GlnRS, putative	37.75	26	59	26	1	800	92.1	6.44	0	High	0	220.63	26
FALSE	Master Protein	AT4G21860.3	methionine sulfoxide reductase B 2	49.0099	9	57	8	1	202	22	8.56	1	High	0	220.53	9
FALSE	Master Protein	AT1G04430.1	S-adenosyl-L-methionine-dependent methyltransferases superfamily protein	46.0674	26	61	13	1	623	70.5	6.6	2	High	0	220.39	26
FALSE	Master Protein	AT1G16300.1	glyceraldehyde-3-phosphate dehydrogenase of plastid 2	39.5238	11	54	5	1	420	44.8	8.62	0	High	0	220.29	11
FALSE	Master Protein	AT1G31440.1	SH3 domain-containing protein	49.6583	19	58	19	1	439	49.2	6.64	0	High	0	220.28	19
FALSE	Master Protein	AT4G39710.1	FK506-binding protein 16-2	35.9447	6	54	6	1	217	23.2	8.15	0	High	0	220.25	6
FALSE	Master Protein	AT5G44070.1	phytochelatin synthase 1 (PCS1)	46.8041	17	54	17	1	485	54.4	6.6	0	High	0	220.16	17
FALSE	Master Protein	AT3G04550.1	unknown protein; INVOLVED IN: biological_process unknown; LOCATED IN: chloroplast stroma, chloroplast; EXPRESSED IN: 22 plant structures; EXPRESSED DURING: 13 growth stages; BEST Arabidopsis thaliana protein match is: unknown protein (TAIR:AT5G28500.1); Has 110 Blast hits to 110 proteins in 51 species: Archae - 0; Bacteria - 67; Metazoa - 1; Fungi - 0; Plants - 41; Viruses - 0; Other Eukaryotes -…	41.6481	19	60	18	1	449	50.2	5.96	1	High	0	220.07	19
FALSE	Master Protein	AT5G28020.2	cysteine synthase D2	53.5604	13	55	7	1	323	34.3	5.59	1	High	0	219.96	13
FALSE	Master Protein	AT5G27470.1	seryl-tRNA synthetase / serine--tRNA ligase	55.4324	27	60	27	1	451	51.6	6.67	0	High	0	219.65	27
FALSE	Master Protein	AT2G18980.1	Peroxidase superfamily protein	56.0372	15	55	12	1	323	35.8	9.55	0	High	0	219.52	15
FALSE	Master Protein	AT5G24400.1	NagB/RpiA/CoA transferase-like superfamily protein	54.7692	17	56	16	1	325	35.6	7.77	1	High	0	219.37	17
FALSE	Master Protein	AT5G20200.1	nucleoporin-related	38.5827	27	60	27	1	762	81.6	9.28	0	High	0	218.74	27
FALSE	Master Protein	AT5G62810.1	peroxin 14	49.7041	19	53	19	1	507	55.6	5.97	0	High	0	218.53	19
FALSE	Master Protein	AT4G01870.1	tolB protein-related	45.2454	20	54	20	1	652	72.8	5.99	0	High	0	218.46	20
FALSE	Master Protein	AT4G20980.2	Eukaryotic translation initiation factor 3 subunit 7 (eIF-3)	28.5956	17	57	8	1	591	66.7	5.77	12	High	0	218.38	17
FALSE	Master Protein	AT3G01340.2	Transducin/WD40 repeat-like superfamily protein	66.8874	14	55	12	1	302	32.6	6.05	0	High	0	218.38	14
FALSE	Master Protein	AT5G53850.2	haloacid dehalogenase-like hydrolase family protein	48.1262	21	57	21	1	507	56.5	6.2	0	High	0	218.04	21
FALSE	Master Protein	AT2G39800.1	delta1-pyrroline-5-carboxylate synthase 1	40.1674	26	60	12	1	717	77.7	6.29	0	High	0	217.98	26
FALSE	Master Protein	AT2G34640.1	plastid transcriptionally active 12	47.2486	23	61	23	1	527	60.9	5.06	0	High	0	217.95	23
FALSE	Master Protein	AT5G41970.1	Metal-dependent protein hydrolase	55.2279	21	58	18	1	373	42.3	6.29	3	High	0	217.91	21
FALSE	Master Protein	AT2G14120.1	dynamin related protein	47.8205	32	62	24	1	780	86.6	6.32	0	High	0	217.87	32
FALSE	Master Protein	AT1G12840.1	vacuolar ATP synthase subunit C (VATC) / V-ATPase C subunit / vacuolar proton pump C subunit (DET3)	48.5333	18	57	18	1	375	42.6	5.54	0	High	0	217.52	18
FALSE	Master Protein	AT3G44300.1	nitrilase 2	48.3776	17	59	7	1	339	37.1	5.55	0	High	0	217.39	17
FALSE	Master Protein	AT5G10560.1	Glycosyl hydrolase family protein	35.4798	25	60	24	1	792	87.1	6.38	1	High	0	217.37	25
FALSE	Master Protein	AT4G20830.1	FAD-binding Berberine family protein	39.1228	24	60	22	1	570	63.5	9.58	2	High	0	216.83	24
FALSE	Master Protein	AT2G41560.1	autoinhibited Ca(2+)-ATPase, isoform 4	32.0388	31	63	22	1	1030	112.7	6.07	11	High	0	216.77	31
FALSE	Master Protein	AT1G24510.1	TCP-1/cpn60 chaperonin family protein	43.1776	22	61	22	1	535	59.3	5.66	0	High	0	216.67	22
FALSE	Master Protein	AT4G16143.1	importin alpha isoform 2	46.5421	21	53	14	1	535	58.9	5.1	0	High	0	215.92	21
FALSE	Master Protein	AT2G17130.1	isocitrate dehydrogenase subunit 2	32.1526	12	57	6	1	367	39.6	6.55	0	High	0	215.74	12
FALSE	Master Protein	AT3G55010.1	phosphoribosylformylglycinamidine cyclo-ligase, chloroplast / phosphoribosyl-aminoimidazole synthetase / AIR synthase (PUR5)	40.1028	11	50	10	1	389	41.5	5.52	0	High	0	215.49	11
FALSE	Master Protein	AT4G22890.1	PGR5-LIKE A	31.1728	9	51	1	1	324	35.7	5.29	0	High	0	215.36	9
FALSE	Master Protein	AT1G35580.2	cytosolic invertase 1	39.2015	18	55	12	1	551	62.8	6.83	6	High	0	215.25	18
FALSE	Master Protein	AT4G23650.1	calcium-dependent protein kinase 6	41.7769	22	54	22	1	529	59.3	6.37	0	High	0	214.97	22
FALSE	Master Protein	AT3G60820.3	N-terminal nucleophile aminohydrolases (Ntn hydrolases) superfamily protein	64.1256	12	52	12	1	223	24.6	7.4	0	High	0	214.88	12
FALSE	Master Protein	AT3G19480.1	D-3-phosphoglycerate dehydrogenase	31.9728	18	57	15	1	588	62.1	8.24	0	High	0	214.86	18
FALSE	Master Protein	AT2G39460.2	ribosomal protein L23AA	34.4156	8	63	8	1	154	17.4	10.2	0	High	0	214.73	8
FALSE	Master Protein	AT3G56070.1	rotamase cyclophilin 2	76.7045	13	62	11	1	176	18.9	7.81	1	High	0	214.5	13
FALSE	Master Protein	AT3G26720.1	Glycosyl hydrolase family 38 protein	25.9078	21	56	21	1	1019	115.1	6.73	0	High	0	214.19	21
FALSE	Master Protein	AT2G39990.1	eukaryotic translation initiation factor 2	41.6382	11	55	11	1	293	31.8	5.14	0	High	0	214.16	11
FALSE	Master Protein	AT5G17380.1	Thiamine pyrophosphate dependent pyruvate decarboxylase family protein	43.1818	20	59	20	1	572	61.4	6.05	0	High	0	214.12	20
FALSE	Master Protein	AT3G52750.1	Tubulin/FtsZ family protein	34.2495	10	44	6	1	473	50.3	5.96	0	High	0	213.93	10
FALSE	Master Protein	AT2G37550.2	ARF-GAP domain 7	54.6053	23	54	18	1	456	49.2	6.33	5	High	0	213.67	23
FALSE	Master Protein	AT1G75280.1	NmrA-like negative transcriptional regulator family protein	56.4516	17	62	17	1	310	33.7	5.94	0	High	0	213.4	17
FALSE	Master Protein	AT2G42690.1	alpha/beta-Hydrolases superfamily protein	35.1942	12	54	12	1	412	46	5.25	0	High	0	212.94	12
FALSE	Master Protein	AT2G35880.1	TPX2 (targeting protein for Xklp2) protein family	51.8519	24	59	24	1	432	46.7	9.7	0	High	0	212.82	24
FALSE	Master Protein	AT3G02880.1	Leucine-rich repeat protein kinase family protein	45.933	25	54	18	1	627	67.7	8.37	7	High	0	212.76	25
FALSE	Master Protein	AT5G60670.1	Ribosomal protein L11 family protein	56.0241	8	59	1	1	166	17.8	8.92	0	High	0	212.75	8
FALSE	Master Protein	AT3G22640.1	cupin family protein	34.1564	15	55	15	1	486	55	7.14	0	High	0	212.34	15
FALSE	Master Protein	AT1G14850.1	nucleoporin 155	26.0929	31	59	31	1	1464	159.9	5.48	0	High	0	211.93	31
FALSE	Master Protein	AT1G09830.1	Glycinamide ribonucleotide (GAR) synthetase	44.9248	20	51	19	1	532	56.4	5.67	1	High	0	211.9	20
FALSE	Master Protein	AT3G54360.1	zinc ion binding	62.716	25	58	25	1	405	44.5	5.27	0	High	0	211.76	25
FALSE	Master Protein	AT2G44350.2	Citrate synthase family protein	33.3333	13	54	13	1	474	52.7	6.89	0	High	0	211.73	13
FALSE	Master Protein	AT1G74960.2	fatty acid biosynthesis 1	28.0961	11	48	11	1	541	57.6	7.87	0	High	0	211.72	11
FALSE	Master Protein	AT1G31330.1	photosystem I subunit F	46.6063	9	53	9	1	221	24.2	9.54	0	High	0	211.71	9
FALSE	Master Protein	AT3G20390.1	endoribonuclease L-PSP family protein	63.6364	11	56	11	1	187	19.8	8.4	0	High	0	211.42	11
FALSE	Master Protein	AT3G57020.1	Calcium-dependent phosphotriesterase superfamily protein	51.3514	16	50	16	1	370	41.4	7.01	0	High	0	211.11	16
FALSE	Master Protein	AT2G37270.2	ribosomal protein 5B	41.0628	9	59	9	1	207	23	9.67	0	High	0	210.82	9
FALSE	Master Protein	AT4G13180.1	NAD(P)-binding Rossmann-fold superfamily protein	60.8365	12	52	11	1	263	27.6	6.77	2	High	0	210.78	12
FALSE	Master Protein	AT3G19420.1	PTEN 2	38.6252	20	55	19	1	611	66.4	5.49	1	High	0	210.76	20
FALSE	Master Protein	AT3G13060.2	evolutionarily conserved C-terminal region 5	35.1735	17	51	15	1	634	69.4	5.58	1	High	0	210.67	17
FALSE	Master Protein	AT3G23450.1	unknown protein; FUNCTIONS IN: molecular_function unknown; INVOLVED IN: biological_process unknown; LOCATED IN: endomembrane system; EXPRESSED IN: 14 plant structures; EXPRESSED DURING: 8 growth stages; Has 694543 Blast hits to 47111 proteins in 2535 species: Archae - 1794; Bacteria - 163056; Metazoa - 258989; Fungi - 49151; Plants - 70496; Viruses - 8919; Other Eukaryotes - 142138 (source: NCBI …	70.1327	8	56	8	1	452	34.8	10.81	0	High	0	210.62	8
FALSE	Master Protein	AT5G23210.1	serine carboxypeptidase-like 34	35.6713	16	54	16	1	499	56.3	8.46	0	High	0	210.62	16
FALSE	Master Protein	AT1G22410.1	Class-II DAHP synthetase family protein	39.2789	16	53	12	1	527	58.3	8.32	0	High	0	210.61	16
FALSE	Master Protein	AT1G16470.1	proteasome subunit PAB1	54.8936	12	52	12	1	235	25.7	5.69	0	High	0	210.58	12
FALSE	Master Protein	AT1G55540.1	Nuclear pore complex protein	23.6233	32	53	32	1	1816	192.5	5.57	0	High	0	210.56	32
FALSE	Master Protein	AT1G06690.1	NAD(P)-linked oxidoreductase superfamily protein	44.8276	13	57	13	1	377	41.5	8.82	0	High	0	210.3	13
FALSE	Master Protein	AT2G17870.1	cold shock domain protein 3	64.4518	14	49	14	1	301	29.5	7.42	0	High	0	210.11	14
FALSE	Master Protein	AT1G12250.1	Pentapeptide repeat-containing protein	54.2857	13	54	13	1	280	30	8.44	0	High	0	209.88	13
FALSE	Master Protein	AT3G26340.1	N-terminal nucleophile aminohydrolases (Ntn hydrolases) superfamily protein	67.3993	12	53	4	1	273	29.5	6.23	10	High	0	209.3	12
FALSE	Master Protein	AT5G59420.1	OSBP(oxysterol binding protein)-related protein 3C	46.3895	14	55	12	1	457	51.9	5.3	2	High	0	209.08	14
FALSE	Master Protein	AT5G35590.1	proteasome alpha subunit A1	62.6016	15	56	5	1	246	27.3	5.86	0	High	0	209.07	15
FALSE	Master Protein	AT5G42220.1	Ubiquitin-like superfamily protein	27.5313	19	55	19	1	879	92.5	5.22	0	High	0	208.99	19
FALSE	Master Protein	AT3G58500.1	protein phosphatase 2A-4	45.6869	11	48	2	1	313	35.7	5.24	11	High	0	208.9	11
FALSE	Master Protein	AT1G06190.2	Rho termination factor	58.9041	18	59	1	1	292	32.6	9.92	0	High	0	208.75	18
FALSE	Master Protein	AT3G48170.1	aldehyde dehydrogenase 10A9	51.8887	16	52	15	1	503	54.9	5.52	0	High	0	208.66	16
FALSE	Master Protein	AT5G17770.1	NADH:cytochrome B5 reductase 1	59.4306	15	58	15	1	281	31.5	8.38	0	High	0	208.64	15
FALSE	Master Protein	AT5G02960.1	Ribosomal protein S12/S23 family protein	48.5915	7	56	7	1	142	15.7	10.37	0	High	0	208.5	7
FALSE	Master Protein	AT4G35800.1	RNA polymerase II large subunit	19.6846	36	59	36	1	1839	204.5	6.04	0	High	0	208.47	36
FALSE	Master Protein	AT3G16110.1	PDI-like 1-6	38.3895	18	54	16	1	534	59.5	5.02	2	High	0	208.29	18
FALSE	Master Protein	AT3G17940.1	Galactose mutarotase-like superfamily protein	56.305	15	50	15	1	341	37.2	6.33	0	High	0	208.08	15
FALSE	Master Protein	AT4G21580.1	oxidoreductase, zinc-binding dehydrogenase family protein	53.8462	14	54	14	1	325	34.4	6.89	0	High	0	207.74	14
FALSE	Master Protein	AT2G29560.1	cytosolic enolase	59.3684	19	48	19	1	475	51.6	5.52	0	High	0	207.56	19
FALSE	Master Protein	AT1G80030.3	Molecular chaperone Hsp40/DnaJ family protein	37.4	17	50	17	1	500	53.8	7.56	0	High	0	207.21	17
FALSE	Master Protein	AT4G14210.1	phytoene desaturase 3	38.3392	19	54	19	1	566	62.9	6.48	0	High	0	207.13	19
FALSE	Master Protein	AT2G31810.1	ACT domain-containing small subunit of acetolactate synthase protein	39.1039	18	54	18	1	491	53.8	8.97	0	High	0	206.88	18
FALSE	Master Protein	AT5G35790.1	glucose-6-phosphate dehydrogenase 1	41.8403	23	59	18	1	576	65.4	7.74	4	High	0	206.71	23
FALSE	Master Protein	AT1G67680.1	SRP72 RNA-binding domain	39.9096	26	57	25	1	664	73	8.82	1	High	0	206.4	26
FALSE	Master Protein	AT5G60540.1	pyridoxine biosynthesis 2	63.9216	11	44	11	1	255	27.4	5.3	0	High	0	206.33	11
FALSE	Master Protein	AT1G21640.2	NAD kinase 2	33.2332	28	56	28	1	999	110.8	7.43	0	High	0	206.31	28
FALSE	Master Protein	AT3G14010.1	CTC-interacting domain 4	37.8151	20	56	1	1	595	65.7	6.92	19	High	0	205.3	20
FALSE	Master Protein	AT4G35450.5	ankyrin repeat-containing protein 2	54.8571	12	55	10	1	350	38	4.64	2	High	0	205.05	12
FALSE	Master Protein	AT1G13270.1	methionine aminopeptidase 1B	38.7534	13	48	13	1	369	40.4	7.44	0	High	0	204.9	13
FALSE	Master Protein	AT4G18240.1	starch synthase 4	31.4423	33	57	33	1	1040	117.7	5.96	0	High	0	204.88	33
FALSE	Master Protein	AT3G14010.4	CTC-interacting domain 4	40.6193	20	56	1	1	549	60.2	6.7	0	High	0	204.76	20
FALSE	Master Protein	AT2G43770.1	Transducin/WD40 repeat-like superfamily protein	38.484	14	53	14	1	343	37.9	7.33	0	High	0	204.64	14
FALSE	Master Protein	AT4G11820.2	hydroxymethylglutaryl-CoA synthase / HMG-CoA synthase / 3-hydroxy-3-methylglutaryl coenzyme A synthase	42.9501	15	56	15	1	461	51.1	6.4	0	High	0	204.54	15
FALSE	Master Protein	AT4G15410.1	serine/threonine protein phosphatase 2A 55 kDa regulatory subunit B prime gamma	48.4561	18	48	18	1	421	45	5.62	0	High	0	204.52	18
FALSE	Master Protein	AT5G66680.1	dolichyl-diphosphooligosaccharide-protein glycosyltransferase 48kDa subunit family protein	43.0206	18	60	18	1	437	48.7	6.34	0	High	0	204.47	18
FALSE	Master Protein	AT4G27090.1	Ribosomal protein L14	61.9403	11	57	6	1	134	15.5	10.04	6	High	0	204.42	11
FALSE	Master Protein	AT1G31730.1	Adaptin family protein	30.3838	26	55	26	1	938	103.7	5.53	0	High	0	204.42	26
FALSE	Master Protein	AT1G04510.1	MOS4-associated complex 3A	47.2275	20	59	17	1	523	56.8	6.64	0	High	0	204.27	20
FALSE	Master Protein	AT3G45190.1	SIT4 phosphatase-associated family protein	28.5171	21	53	19	1	789	87.6	4.55	2	High	0	204	21
FALSE	Master Protein	AT4G01290.1	unknown protein; FUNCTIONS IN: molecular_function unknown; INVOLVED IN: biological_process unknown; LOCATED IN: cellular_component unknown; EXPRESSED IN: 24 plant structures; EXPRESSED DURING: 15 growth stages; Has 1744 Blast hits to 1308 proteins in 219 species: Archae - 0; Bacteria - 241; Metazoa - 793; Fungi - 253; Plants - 108; Viruses - 0; Other Eukaryotes - 349 (source: NCBI BLink).	42.2805	32	53	32	1	991	108.5	6.84	0	High	0	203.78	32
FALSE	Master Protein	AT2G38270.1	CAX-interacting protein 2	52.2184	13	52	13	1	293	32.2	7.9	0	High	0	203.68	13
FALSE	Master Protein	AT1G79690.1	nudix hydrolase homolog 3	38.7306	28	57	28	1	772	86.8	5.44	0	High	0	203.54	28
FALSE	Master Protein	AT3G06050.1	peroxiredoxin IIF	63.6816	11	57	11	1	201	21.4	8.9	0	High	0	203.22	11
FALSE	Master Protein	AT4G09670.1	Oxidoreductase family protein	53.0387	16	54	16	1	362	39.5	5.88	0	High	0	202.84	16
FALSE	Master Protein	AT1G74020.1	strictosidine synthase 2	39.403	11	50	10	1	335	35.3	5.81	1	High	0	202.84	11
FALSE	Master Protein	AT2G25430.1	epsin N-terminal homology (ENTH) domain-containing protein / clathrin assembly protein-related	43.4916	22	52	16	1	653	72	5.43	8	High	0	202.8	22
FALSE	Master Protein	AT3G10050.1	L-O-methylthreonine resistant 1	48.3108	23	52	23	1	592	64.6	7.55	0	High	0	202.8	23
FALSE	Master Protein	AT1G77060.1	Phosphoenolpyruvate carboxylase family protein	30.9735	7	42	5	1	339	36.5	6.86	0	High	0	202.75	7
FALSE	Master Protein	AT4G37000.1	accelerated cell death 2 (ACD2)	64.8903	19	57	19	1	319	36.4	6.04	0	High	0	202.75	19
FALSE	Master Protein	AT5G44320.1	Eukaryotic translation initiation factor 3 subunit 7 (eIF-3)	28.7415	17	57	8	1	588	66.2	5.63	0	High	0	202.51	17
FALSE	Master Protein	AT5G19440.1	NAD(P)-binding Rossmann-fold superfamily protein	53.0675	15	55	14	1	326	35.6	7.12	1	High	0	202.49	15
FALSE	Master Protein	AT1G11650.2	RNA-binding (RRM/RBD/RNP motifs) family protein	36.2963	11	49	11	1	405	44.1	5.87	0	High	0	202.4	11
FALSE	Master Protein	AT5G16990.1	Zinc-binding dehydrogenase family protein	53.0612	14	55	6	1	343	38	8.02	1	High	0	202.4	14
FALSE	Master Protein	AT4G34240.1	aldehyde dehydrogenase 3I1	32	16	51	16	1	550	60.1	8.51	0	High	0	202.3	16
FALSE	Master Protein	AT5G66120.2	3-dehydroquinate synthase, putative	50.2262	21	58	21	1	442	48	7.46	0	High	0	202.2	21
FALSE	Master Protein	AT2G45240.1	methionine aminopeptidase 1A	71.1055	19	47	19	1	398	44	7.11	0	High	0	202.11	19
FALSE	Master Protein	AT4G00630.2	K+ efflux antiporter 2	25.654	23	51	18	1	1185	127.5	5.2	0	High	0	202.11	23
FALSE	Master Protein	AT1G30510.2	root FNR 2	56.2827	19	64	12	1	382	42.8	8.6	9	High	0	201.62	19
FALSE	Master Protein	AT2G42910.1	Phosphoribosyltransferase family protein	53.1157	14	45	14	1	337	37.5	6.46	0	High	0	201.5	14
FALSE	Master Protein	AT1G21440.1	Phosphoenolpyruvate carboxylase family protein	48.8095	14	47	12	1	336	36.3	7.15	2	High	0	201.48	14
FALSE	Master Protein	AT3G43600.1	aldehyde oxidase 2	25.9652	28	51	23	1	1321	144.5	5.71	5	High	0	201.13	28
FALSE	Master Protein	AT4G14160.1	Sec23/Sec24 protein transport family protein	26.6494	19	50	14	1	773	85.3	5.97	6	High	0	201.01	19
FALSE	Master Protein	AT3G62240.1	RING/U-box superfamily protein	43.9655	31	55	31	1	812	90.2	8.13	0	High	0	201	31
FALSE	Master Protein	AT3G53180.1	glutamate-ammonia ligases;catalytics;glutamate-ammonia ligases	36.6197	26	51	26	1	852	94.3	5.85	0	High	0	200.87	26
FALSE	Master Protein	AT4G24800.2	MA3 domain-containing protein	42.8775	24	51	23	1	702	77.4	5.14	1	High	0	200.77	24
FALSE	Master Protein	AT5G53170.1	FTSH protease 11	39.4541	25	55	24	1	806	88.7	6.13	1	High	0	200.67	25
FALSE	Master Protein	AT5G14260.2	Rubisco methyltransferase family protein	39.4942	18	51	18	1	514	57.5	6.79	0	High	0	200.24	18
FALSE	Master Protein	AT2G10940.1	Bifunctional inhibitor/lipid-transfer protein/seed storage 2S albumin superfamily protein	54.2955	7	59	7	1	291	29.6	9.39	0	High	0	200.2	7
FALSE	Master Protein	AT1G56450.1	20S proteasome beta subunit G1	50.813	9	47	9	1	246	27.6	6.55	0	High	0	200.11	9
FALSE	Master Protein	AT5G58440.1	sorting nexin 2A	48.7223	24	57	18	1	587	65.5	5.29	6	High	0	200.02	24
FALSE	Master Protein	AT5G40490.1	RNA-binding (RRM/RBD/RNP motifs) family protein	50.1182	16	49	16	1	423	42.4	6.47	0	High	0	199.81	16
FALSE	Master Protein	AT1G10960.1	ferredoxin 1	29.7297	2	56	2	1	148	15.9	4.54	0	High	0	199.76	2
FALSE	Master Protein	AT5G66510.1	gamma carbonic anhydrase 3	58.5271	12	52	8	1	258	27.8	7.27	1	High	0	199.56	12
FALSE	Master Protein	AT1G72610.1	germin-like protein 1	8.17308	2	49	2	1	208	21.5	9.2	0	High	0	199.54	2
FALSE	Master Protein	AT1G66970.1	SHV3-like 2	26.7366	16	52	12	1	763	83.7	5.17	3	High	0	199.39	16
FALSE	Master Protein	AT4G23100.1	glutamate-cysteine ligase	27.2031	14	56	14	1	522	58.5	6.57	0	High	0	199.36	14
FALSE	Master Protein	AT5G54430.1	Adenine nucleotide alpha hydrolases-like superfamily protein	56.6116	11	50	9	1	242	26.2	6.57	0	High	0	199.09	11
FALSE	Master Protein	AT1G11720.2	starch synthase 3	28.9762	29	57	29	1	1094	124.2	6.76	0	High	0	198.94	29
FALSE	Master Protein	AT4G27430.1	COP1-interacting protein 7	32.8922	28	55	28	1	1058	118.4	6.27	0	High	0	198.76	28
FALSE	Master Protein	AT1G80670.1	Transducin/WD40 repeat-like superfamily protein	50.1433	13	50	13	1	349	38.2	8.37	0	High	0	198.59	13
FALSE	Master Protein	AT5G07020.1	proline-rich family protein	29.3617	7	51	7	1	235	24.4	4.75	0	High	0	198.57	7
FALSE	Master Protein	AT5G38530.1	tryptophan synthase beta type 2	35.9684	12	46	12	1	506	55.7	7.24	0	High	0	198.02	12
FALSE	Master Protein	AT4G35460.1	NADPH-dependent thioredoxin reductase B	45.6	11	41	7	1	375	39.6	7.36	0	High	0	197.94	11
FALSE	Master Protein	AT1G48900.1	Signal recognition particle, SRP54 subunit protein	53.3333	25	54	25	1	495	54.7	8.92	0	High	0	197.85	25
FALSE	Master Protein	AT5G42960.1	unknown protein; FUNCTIONS IN: molecular_function unknown; INVOLVED IN: biological_process unknown; LOCATED IN: mitochondrion, chloroplast, plastid, chloroplast envelope; EXPRESSED IN: 24 plant structures; EXPRESSED DURING: 13 growth stages; BEST Arabidopsis thaliana protein match is: unknown protein (TAIR:AT1G45170.1); Has 30201 Blast hits to 17322 proteins in 780 species: Archae - 12; Bacteria …	61.9718	12	51	11	1	213	23.4	9.2	1	High	0	197.62	12
FALSE	Master Protein	AT5G40390.1	Raffinose synthase family protein	29.3742	18	45	18	1	783	86.2	5.07	0	High	0	197.43	18
FALSE	Master Protein	AT3G24830.1	Ribosomal protein L13 family protein	55.3398	12	63	4	1	206	23.4	10.35	0	High	0	197.37	12
FALSE	Master Protein	AT5G19370.1	rhodanese-like domain-containing protein / PPIC-type PPIASE domain-containing protein	61.204	16	50	16	1	299	33	8.41	0	High	0	197.35	16
FALSE	Master Protein	AT2G41530.1	S-formylglutathione hydrolase	45.7746	12	52	12	1	284	31.6	6.37	0	High	0	197.28	12
FALSE	Master Protein	AT3G55220.1	Cleavage and polyadenylation specificity factor (CPSF) A subunit protein	25.2059	27	55	27	1	1214	134.9	5.54	0	High	0	197.18	27
FALSE	Master Protein	ATCG00190.1	RNA polymerase subunit beta	28.1716	26	55	26	1	1072	121	8.5	0	High	0	197.03	26
FALSE	Master Protein	AT2G32730.1	26S proteasome regulatory complex, non-ATPase subcomplex, Rpn2/Psmd1 subunit	24.004	25	57	10	1	1004	108.9	5.39	16	High	0	197	25
FALSE	Master Protein	AT4G34230.1	cinnamyl alcohol dehydrogenase 5	55.4622	15	52	14	1	357	38.7	5.67	0	High	0	196.57	15
FALSE	Master Protein	AT1G07070.1	Ribosomal protein L35Ae family protein	58.9286	6	67	3	1	112	12.8	10.68	4	High	0	196.55	6
FALSE	Master Protein	AT5G59950.5	RNA-binding (RRM/RBD/RNP motifs) family protein	53.0612	14	51	13	1	245	25.8	9.83	1	High	0	196.45	14
FALSE	Master Protein	AT5G35100.1	Cyclophilin-like peptidyl-prolyl cis-trans isomerase family protein	54.0925	15	55	15	1	281	30.5	7.27	0	High	0	196.35	15
FALSE	Master Protein	AT2G35630.1	ARM repeat superfamily protein	21.8402	36	56	36	1	1978	217.4	7.56	0	High	0	196.32	36
FALSE	Master Protein	AT1G06900.1	Insulinase (Peptidase family M16) family protein	28.3203	26	55	26	1	1024	117.1	4.89	0	High	0	196.3	26
FALSE	Master Protein	AT4G30720.1	FAD/NAD(P)-binding oxidoreductase family protein	35.3607	24	54	24	1	707	77	8.5	0	High	0	196.2	24
FALSE	Master Protein	AT3G21110.1	purin 7	50.1217	16	50	16	1	411	46	6.44	0	High	0	196.14	16
FALSE	Master Protein	AT4G14890.1	2Fe-2S ferredoxin-like superfamily protein	64.9351	6	47	6	1	154	16.7	4.84	0	High	0	196.12	6
FALSE	Master Protein	AT5G08610.1	P-loop containing nucleoside triphosphate hydrolases superfamily protein	36.1176	21	52	21	1	850	94.1	9.47	0	High	0	196.01	21
FALSE	Master Protein	AT5G03040.3	IQ-domain 2	53.1453	20	49	20	1	461	50.4	10.64	0	High	0	195.86	20
FALSE	Master Protein	AT5G65460.1	kinesin like protein for actin based chloroplast movement 2	30.0633	33	56	22	1	1264	140.3	6.24	0	High	0	195.63	33
FALSE	Master Protein	AT5G40370.1	Glutaredoxin family protein	85.5856	8	41	8	1	111	11.7	7.24	0	High	0	195.63	8
FALSE	Master Protein	AT4G04950.1	thioredoxin family protein	50.4098	17	49	17	1	488	53.1	5.08	0	High	0	195.38	17
FALSE	Master Protein	AT3G44750.1	histone deacetylase 3	41.6327	12	56	12	1	245	26.4	5.2	0	High	0	195.26	12
FALSE	Master Protein	AT3G01910.1	sulfite oxidase	52.1628	16	53	16	1	393	43.3	8.68	0	High	0	194.94	16
FALSE	Master Protein	AT3G22060.1	Receptor-like protein kinase-related family protein	63.0952	14	52	14	1	252	27.8	8.75	0	High	0	194.78	14
FALSE	Master Protein	AT1G48110.2	evolutionarily conserved C-terminal region 7	50.5477	30	56	26	1	639	70.8	6.96	4	High	0	194.56	30
FALSE	Master Protein	AT1G77590.1	long chain acyl-CoA synthetase 9	32.4168	19	51	17	1	691	76.1	6.98	0	High	0	194.45	19
FALSE	Master Protein	AT4G39090.1	Papain family cysteine protease	28.8043	10	48	9	1	368	40.4	7.17	1	High	0	194.45	10
FALSE	Master Protein	AT1G79750.1	NADP-malic enzyme 4	36.0681	17	47	12	1	646	71.1	6.58	2	High	0	194.42	17
FALSE	Master Protein	AT3G47470.1	light-harvesting chlorophyll-protein complex I subunit A4	35.0598	7	44	7	1	251	27.7	6.7	0	High	0	194.37	7
FALSE	Master Protein	AT1G52670.1	Single hybrid motif superfamily protein	42.3358	7	39	7	1	274	29.6	8.38	0	High	0	194.25	7
FALSE	Master Protein	AT3G53260.1	phenylalanine ammonia-lyase 2	40.0279	25	51	14	1	717	77.8	6.46	0	High	0	194.1	25
FALSE	Master Protein	AT4G17830.1	Peptidase M20/M25/M40 family protein	40.4545	15	50	15	1	440	48.2	5.35	0	High	0	193.93	15
FALSE	Master Protein	AT5G51070.1	Clp ATPase	26.9841	22	51	21	1	945	103.2	6.23	0	High	0	193.32	22
FALSE	Master Protein	AT5G60360.1	aleurain-like protease	36.8715	11	56	9	1	358	38.9	6.71	2	High	0	193.3	11
FALSE	Master Protein	AT4G09000.1	general regulatory factor 1	62.5468	16	55	9	1	267	29.9	4.81	0	High	0	193.25	16
FALSE	Master Protein	AT1G47600.1	beta glucosidase 34	40.7045	16	48	7	1	511	57.5	8.12	9	High	0	193.23	16
FALSE	Master Protein	AT4G34030.1	3-methylcrotonyl-CoA carboxylase	37.9898	20	50	20	1	587	64	8.53	0	High	0	193.22	20
FALSE	Master Protein	AT1G60550.1	enoyl-CoA hydratase/isomerase D	52.5223	17	50	17	1	337	37	7.25	0	High	0	193.16	17
FALSE	Master Protein	AT3G08510.1	phospholipase C 2	45.2668	26	58	26	1	581	66.1	6.54	0	High	0	193.14	26
FALSE	Master Protein	AT1G76690.1	12-oxophytodienoate reductase 2	50.5348	14	49	8	1	374	41.5	7.52	0	High	0	193.02	14
FALSE	Master Protein	AT1G66240.1	homolog of anti-oxidant 1	50	7	47	7	1	106	11.4	7.94	0	High	0	192.98	7
FALSE	Master Protein	AT2G38540.1	lipid transfer protein 1	43.2203	7	59	7	1	118	11.7	8.95	0	High	0	192.82	7
FALSE	Master Protein	AT2G17410.1	ARID/BRIGHT DNA-binding domain-containing protein	38.5496	29	54	27	1	786	86.5	4.67	2	High	0	192.75	29
FALSE	Master Protein	AT3G47860.1	chloroplastic lipocalin	41.9263	14	50	14	1	353	39.1	6.74	0	High	0	192.74	14
FALSE	Master Protein	AT5G42980.1	thioredoxin 3	52.5424	8	53	8	1	118	13.1	5.14	0	High	0	192.73	8
FALSE	Master Protein	AT3G06850.1	2-oxoacid dehydrogenases acyltransferase family protein	49.0683	17	47	17	1	483	52.7	6.76	0	High	0	191.74	17
FALSE	Master Protein	AT2G32810.1	beta galactosidase 9	33.0327	25	54	24	1	887	99.1	8.03	0	High	0	191.65	25
FALSE	Master Protein	AT1G17860.1	Kunitz family trypsin and protease inhibitor protein	64.7959	10	49	10	1	196	22.1	8.78	0	High	0	191.6	10
FALSE	Master Protein	AT1G74070.1	Cyclophilin-like peptidyl-prolyl cis-trans isomerase family protein	44.164	14	54	13	1	317	34.4	9.47	0	High	0	191.18	14
FALSE	Master Protein	AT1G26110.1	decapping 5	24.7136	13	50	13	1	611	64.3	7.71	0	High	0	191.17	13
FALSE	Master Protein	AT2G13560.1	NAD-dependent malic enzyme 1	44.4623	19	49	19	1	623	69.6	5.45	0	High	0	191.14	19
FALSE	Master Protein	AT3G62870.1	Ribosomal protein L7Ae/L30e/S12e/Gadd45 family protein	53.9062	18	61	3	1	256	29	10.15	0	High	0	191.13	18
FALSE	Master Protein	AT3G18820.1	RAB GTPase homolog G3F	75.2427	14	52	4	1	206	23.1	5.08	4	High	0	191.13	14
FALSE	Master Protein	AT1G15290.1	Tetratricopeptide repeat (TPR)-like superfamily protein	19.6517	27	52	22	1	1608	177.5	7.01	0	High	0	190.78	27
FALSE	Master Protein	AT3G22380.2	time for coffee	21.1576	27	54	27	1	1555	164.8	9.69	0	High	0	190.66	27
FALSE	Master Protein	AT2G38380.1	Peroxidase superfamily protein	34.0974	10	58	5	1	349	38.1	6	2	High	0	190.53	10
FALSE	Master Protein	AT2G28470.1	beta-galactosidase 8	39.9061	26	49	24	1	852	93.2	7.85	2	High	0	190.5	26
FALSE	Master Protein	AT1G75750.1	GAST1 protein homolog 1	46.9388	5	51	5	1	98	10.7	9.11	0	High	0	190.41	5
FALSE	Master Protein	AT4G33580.1	beta carbonic anhydrase 5	56.8106	16	53	16	1	301	33.4	8.41	0	High	0	190.4	16
FALSE	Master Protein	AT1G22940.1	thiamin biosynthesis protein, putative	43.295	18	47	18	1	522	55.8	6.55	0	High	0	190.4	18
FALSE	Master Protein	AT3G15090.1	GroES-like zinc-binding alcohol dehydrogenase family protein	37.7049	12	45	12	1	366	39.4	9.03	0	High	0	190.26	12
FALSE	Master Protein	AT1G35680.1	Ribosomal protein L21	41.3636	7	48	7	1	220	24	9.25	0	High	0	190.25	7
FALSE	Master Protein	AT3G46060.3	RAB GTPase homolog 8A	62.037	13	48	3	1	216	23.8	7.83	2	High	0	189.83	13
FALSE	Master Protein	AT1G17210.1	IAP-like protein 1	30.7933	21	50	20	1	958	103	4.97	1	High	0	189.79	21
FALSE	Master Protein	AT4G31530.1	NAD(P)-binding Rossmann-fold superfamily protein	46.2963	14	49	14	1	324	35.2	7.9	0	High	0	189.71	14
FALSE	Master Protein	AT5G28750.1	Bacterial sec-independent translocation protein mttA/Hcf106	35.3741	9	46	9	1	147	15.7	9.13	0	High	0	189.64	9
FALSE	Master Protein	AT2G37470.1	Histone superfamily protein	46.3768	7	58	1	1	138	15.1	10.05	0	High	0	189.6	7
FALSE	Master Protein	AT5G10920.1	L-Aspartase-like family protein	40.619	18	49	18	1	517	57.5	5.88	0	High	0	189.58	18
FALSE	Master Protein	AT5G25980.2	glucoside glucohydrolase 2	31.0786	16	50	15	1	547	62.7	7.44	0	High	0	189.52	16
FALSE	Master Protein	AT3G01540.3	DEAD box RNA helicase 1	40.8724	20	51	11	1	619	67.7	9.76	3	High	0	189.51	20
FALSE	Master Protein	AT1G01800.1	NAD(P)-binding Rossmann-fold superfamily protein	61.3559	15	51	15	1	295	31.6	5.39	0	High	0	189.49	15
FALSE	Master Protein	AT1G78370.1	glutathione S-transferase TAU 20	43.7788	17	60	14	1	217	25	5.78	3	High	0	189.11	17
FALSE	Master Protein	AT2G42490.1	Copper amine oxidase family protein	36.4691	24	53	24	1	776	86.6	7.12	0	High	0	189.06	24
FALSE	Master Protein	AT5G18900.1	2-oxoglutarate (2OG) and Fe(II)-dependent oxygenase superfamily protein	48.6577	15	54	8	1	298	33	7.15	7	High	0	188.82	15
FALSE	Master Protein	AT1G57770.1	FAD/NAD(P)-binding oxidoreductase family protein	36.4111	17	45	17	1	574	61.7	6.98	0	High	0	188.74	17
FALSE	Master Protein	AT4G33350.1	Tic22-like family protein	60.8209	14	48	14	1	268	30.1	9.25	0	High	0	188.73	14
FALSE	Master Protein	AT2G21410.1	vacuolar proton ATPase A2	31.4251	20	47	12	1	821	93	5.54	0	High	0	188.69	20
FALSE	Master Protein	AT2G47450.1	chloroplast signal recognition particle component (CAO)	60.8579	22	49	21	1	373	41.3	4.61	1	High	0	188.69	22
FALSE	Master Protein	AT1G70570.1	anthranilate phosphoribosyltransferase, putative	49.916	24	52	24	1	595	65.2	6.86	0	High	0	188.69	24
FALSE	Master Protein	AT2G29570.1	proliferating cell nuclear antigen 2	58.7121	14	49	3	1	264	29.2	4.72	13	High	0	188.48	14
FALSE	Master Protein	AT5G56870.1	beta-galactosidase 4	37.8453	22	55	14	1	724	80.5	8.68	4	High	0	188.43	22
FALSE	Master Protein	AT2G29630.1	thiaminC	36.9565	18	47	18	1	644	71.9	6.44	0	High	0	188.23	18
FALSE	Master Protein	AT5G49760.1	Leucine-rich repeat protein kinase family protein	32.7387	24	51	20	1	953	104.6	6.2	4	High	0	188.09	24
FALSE	Master Protein	AT3G42170.1	BED zinc finger ;hAT family dimerisation domain	31.8966	17	49	17	1	696	78.8	5.35	0	High	0	188.05	17
FALSE	Master Protein	AT5G38660.1	acclimation of photosynthesis to environment	51.3986	14	48	14	1	286	31.4	8.4	0	High	0	187.96	14
FALSE	Master Protein	AT1G53280.1	Class I glutamine amidotransferase-like superfamily protein	39.2694	14	44	14	1	438	47	7.85	0	High	0	187.87	14
FALSE	Master Protein	AT5G45170.1	Haloacid dehalogenase-like hydrolase (HAD) superfamily protein	59.6774	18	47	18	1	372	40.7	7.84	0	High	0	187.78	18
FALSE	Master Protein	AT1G73180.1	Eukaryotic translation initiation factor eIF2A family protein	47.3684	19	49	19	1	513	56.3	8.88	0	High	0	187.74	19
FALSE	Master Protein	AT1G02840.3	RNA-binding (RRM/RBD/RNP motifs) family protein	41.5842	14	55	11	1	303	33.7	11.06	0	High	0	187.71	14
FALSE	Master Protein	AT5G60980.2	Nuclear transport factor 2 (NTF2) family protein with RNA binding (RRM-RBD-RNP motifs) domain	43.913	16	49	16	1	460	49.5	5.96	0	High	0	187.66	16
FALSE	Master Protein	AT2G04700.1	ferredoxin thioredoxin reductase catalytic beta chain family protein	64.3836	11	51	11	1	146	16.4	7.88	0	High	0	187.57	11
FALSE	Master Protein	AT5G16590.1	Leucine-rich repeat protein kinase family protein	36.16	20	49	13	1	625	67.4	8.5	0	High	0	186.91	20
FALSE	Master Protein	AT3G08900.1	reversibly glycosylated polypeptide 3	24.8619	8	54	1	1	362	41.3	5.6	0	High	0	186.7	8
FALSE	Master Protein	AT5G11710.1	ENTH/VHS family protein	49.6429	19	43	19	1	560	60.6	5.1	0	High	0	186.58	19
FALSE	Master Protein	AT3G48050.1	BAH domain ;TFIIS helical bundle-like domain	28.7043	38	53	38	1	1613	171.8	6.32	0	High	0	186.11	38
FALSE	Master Protein	AT5G18230.1	transcription regulator NOT2/NOT3/NOT5 family protein	31.0795	20	49	1	1	843	92.9	5.5	19	High	0	186.06	20
FALSE	Master Protein	AT3G17770.1	Dihydroxyacetone kinase	40.8403	19	52	19	1	595	61.9	5.14	0	High	0	186.04	19
FALSE	Master Protein	AT4G16720.1	Ribosomal protein L23/L15e family protein	46.0784	11	52	11	1	204	24.2	11.44	0	High	0	185.96	11
FALSE	Master Protein	AT5G10160.1	Thioesterase superfamily protein	44.7489	10	53	7	1	219	24.1	9.26	4	High	0	185.93	10
FALSE	Master Protein	AT4G38600.1	HEAT repeat ;HECT-domain (ubiquitin-transferase)	21.6102	31	52	31	1	1888	202.8	6.18	0	High	0	185.87	31
FALSE	Master Protein	AT2G22250.3	aspartate aminotransferase	40.6316	16	50	16	1	475	51	7.9	0	High	0	185.66	16
FALSE	Master Protein	AT2G43610.1	Chitinase family protein	58.0071	14	51	12	1	281	30	9.39	2	High	0	185.66	14
FALSE	Master Protein	AT3G53900.2	uracil phosphoribosyltransferase	44.9324	13	58	13	1	296	32.2	8.95	0	High	0	185.51	13
FALSE	Master Protein	AT2G37130.1	Peroxidase superfamily protein	53.8226	16	49	16	1	327	36.7	7.4	0	High	0	185.42	16
FALSE	Master Protein	AT2G01250.1	Ribosomal protein L30/L7 family protein	58.2645	17	51	12	1	242	28.2	9.94	5	High	0	185.21	17
FALSE	Master Protein	AT2G29340.1	NAD-dependent epimerase/dehydratase family protein	33.8762	9	47	8	1	307	32.9	5.67	1	High	0	185.14	9
FALSE	Master Protein	AT3G14930.1	Uroporphyrinogen decarboxylase	33.9713	12	49	12	1	418	46.2	7.11	0	High	0	185.11	12
FALSE	Master Protein	AT4G39970.1	Haloacid dehalogenase-like hydrolase (HAD) superfamily protein	54.7468	14	45	14	1	316	34.6	5.6	0	High	0	185.05	14
FALSE	Master Protein	AT5G21930.1	P-type ATPase of Arabidopsis 2	34.2016	24	50	24	1	883	94.2	6.37	0	High	0	184.88	24
FALSE	Master Protein	AT1G07370.1	proliferating cellular nuclear antigen 1	62.3574	14	47	3	1	263	29.1	4.75	0	High	0	184.69	14
FALSE	Master Protein	AT4G10710.1	global transcription factor C	32.9609	35	58	35	1	1074	120.5	6.01	0	High	0	184.5	35
FALSE	Master Protein	AT5G58470.2	TBP-associated factor 15B	48.3412	18	50	18	1	422	42.3	8.5	0	High	0	184.48	18
FALSE	Master Protein	AT3G49010.3	breast basic conserved 1	43.6893	10	49	5	1	206	23.8	11.02	5	High	0	184.45	10
FALSE	Master Protein	AT2G39080.1	NAD(P)-binding Rossmann-fold superfamily protein	48.7179	14	53	14	1	351	38.2	8.02	0	High	0	184.39	14
FALSE	Master Protein	AT1G64550.1	general control non-repressible 3	30.2098	20	50	20	1	715	79.6	6.07	0	High	0	184.36	20
FALSE	Master Protein	AT1G03890.1	RmlC-like cupins superfamily protein	41.2417	15	48	15	1	451	49.6	5.71	0	High	0	184.28	15
FALSE	Master Protein	AT2G24580.1	FAD-dependent oxidoreductase family protein	52.8846	18	46	18	1	416	45.7	6.02	0	High	0	184.27	18
FALSE	Master Protein	AT3G57890.2	Tubulin binding cofactor C domain-containing protein	37.7668	17	47	14	1	609	67	5.76	3	High	0	184.16	17
FALSE	Master Protein	AT5G13850.1	nascent polypeptide-associated complex subunit alpha-like protein 3	57.8431	7	41	3	1	204	22	4.55	1	High	0	184.08	7
FALSE	Master Protein	AT1G04530.1	Tetratricopeptide repeat (TPR)-like superfamily protein	59.6774	17	49	17	1	310	34.5	4.42	0	High	0	184.07	17
FALSE	Master Protein	AT3G22330.1	putative mitochondrial RNA helicase 2	46.1039	24	47	19	1	616	65.3	9.29	6	High	0	183.87	24
FALSE	Master Protein	AT1G09850.1	xylem bark cysteine peptidase 3	31.1213	13	46	13	1	437	48	6.46	0	High	0	183.54	13
FALSE	Master Protein	AT2G20330.1	Transducin/WD40 repeat-like superfamily protein	49.3827	26	50	26	1	648	71.2	5.83	0	High	0	183.36	26
FALSE	Master Protein	AT5G47200.1	RAB GTPase homolog 1A	58.4158	11	53	2	1	202	22.3	5.43	0	High	0	183.32	11
FALSE	Master Protein	AT2G30930.1	unknown protein; FUNCTIONS IN: molecular_function unknown; INVOLVED IN: biological_process unknown; LOCATED IN: chloroplast, plasma membrane, membrane; EXPRESSED IN: 24 plant structures; EXPRESSED DURING: 14 growth stages; BEST Arabidopsis thaliana protein match is: unknown protein (TAIR:AT1G06540.1); Has 194 Blast hits to 176 proteins in 78 species: Archae - 0; Bacteria - 101; Metazoa - 15; Fung…	73.1707	9	45	9	1	164	16.9	5.03	0	High	0	183.28	9
FALSE	Master Protein	AT4G34830.1	Pentatricopeptide repeat (PPR) superfamily protein	30.2112	27	50	27	1	1089	119.7	7.87	0	High	0	183.18	27
FALSE	Master Protein	AT4G32330.1	TPX2 (targeting protein for Xklp2) protein family	44.8513	18	46	18	1	437	47.5	8.5	0	High	0	183.12	18
FALSE	Master Protein	AT3G52560.2	ubiquitin E2 variant 1D-4	68.0272	9	50	5	1	147	16.6	6.68	0	High	0	182.94	9
FALSE	Master Protein	AT2G05840.1	20S proteasome subunit PAA2	58.1301	15	50	5	1	246	27.3	6.09	10	High	0	182.9	15
FALSE	Master Protein	AT3G13490.1	Lysyl-tRNA synthetase, class II	30.897	18	49	18	1	602	67.5	6.02	0	High	0	182.82	18
FALSE	Master Protein	AT4G00830.2	RNA-binding (RRM/RBD/RNP motifs) family protein	33.9394	18	50	18	1	495	55.1	4.72	0	High	0	182.81	18
FALSE	Master Protein	AT2G44610.1	Ras-related small GTP-binding family protein	60.0962	12	52	5	1	208	23.1	7.9	7	High	0	182.69	12
FALSE	Master Protein	AT1G05250.1	Peroxidase superfamily protein	57.5385	16	49	15	1	325	35.6	9.25	2	High	0	182.51	16
FALSE	Master Protein	AT2G17265.1	homoserine kinase	46.4865	15	44	15	1	370	38.5	8.29	0	High	0	182.41	15
FALSE	Master Protein	AT1G77760.1	nitrate reductase 1	30.0981	25	51	20	1	917	103	6.8	0	High	0	182.38	25
FALSE	Master Protein	AT1G04420.1	NAD(P)-linked oxidoreductase superfamily protein	44.9029	15	47	15	1	412	46.4	8.53	0	High	0	182.25	15
FALSE	Master Protein	AT4G14680.1	Pseudouridine synthase/archaeosine transglycosylase-like family protein	32.4731	16	54	4	1	465	52	7.4	0	High	0	181.95	16
FALSE	Master Protein	AT1G51470.1	beta glucosidase 35	38.5519	15	45	6	1	511	57.4	8.1	0	High	0	181.75	15
FALSE	Master Protein	AT5G17000.1	Zinc-binding dehydrogenase family protein	56.5217	14	49	9	1	345	38.1	6.93	0	High	0	181	14
FALSE	Master Protein	AT3G15880.2	WUS-interacting protein 2	21.8118	22	49	12	1	1137	124.2	7.23	0	High	0	180.98	22
FALSE	Master Protein	AT1G80560.1	isopropylmalate dehydrogenase 2	49.6296	15	41	10	1	405	43.3	6.06	5	High	0	180.5	15
FALSE	Master Protein	AT1G53430.1	Leucine-rich repeat transmembrane protein kinase	27.6699	25	54	12	1	1030	113.9	5.66	11	High	0	180.44	25
FALSE	Master Protein	AT2G42810.1	protein phosphatase 5.2	47.5207	20	48	20	1	484	54.7	6.28	0	High	0	180.35	20
FALSE	Master Protein	AT4G29410.2	Ribosomal L28e protein family	44.7552	10	50	8	1	143	15.9	11.05	0	High	0	179.95	10
FALSE	Master Protein	AT5G23300.1	pyrimidine d	33.0435	14	45	14	1	460	48.5	9.2	0	High	0	179.93	14
FALSE	Master Protein	AT5G46070.1	Guanylate-binding family protein	33.8262	35	56	35	1	1082	122.7	6.64	0	High	0	179.21	35
FALSE	Master Protein	AT2G33070.3	nitrile specifier protein 2	46.5116	16	49	13	1	473	51.4	5.76	0	High	0	179.18	16
FALSE	Master Protein	AT4G22890.5	PGR5-LIKE A	30.7453	9	44	1	1	322	35.5	5.29	10	High	0	179.14	9
FALSE	Master Protein	AT3G11400.2	eukaryotic translation initiation factor 3G1	52.0249	16	50	16	1	321	35.6	7.39	0	High	0	179.05	16
FALSE	Master Protein	AT2G01470.1	SEC12P-like 2 protein	50.6361	14	44	14	1	393	42.8	5.64	0	High	0	178.93	14
FALSE	Master Protein	AT2G30870.1	glutathione S-transferase PHI 10	35.3488	9	48	8	1	215	24.2	5.67	1	High	0	178.49	9
FALSE	Master Protein	AT4G11740.1	Ubiquitin-like superfamily protein	41.1348	18	45	16	1	564	62.3	4.67	2	High	0	178.43	18
FALSE	Master Protein	AT1G78380.1	glutathione S-transferase TAU 19	59.3607	17	59	13	1	219	25.6	6.04	2	High	0	178.42	17
FALSE	Master Protein	AT1G47420.1	succinate dehydrogenase 5	47.4708	9	44	9	1	257	28.1	6.65	0	High	0	178.38	9
FALSE	Master Protein	AT3G10380.1	subunit of exocyst complex 8	28.3951	30	51	30	1	1053	116.5	5.92	0	High	0	178.2	30
FALSE	Master Protein	AT3G06400.3	chromatin-remodeling protein 11	30.7474	31	54	11	1	1057	122.5	5.95	20	High	0	178.18	31
FALSE	Master Protein	AT3G26520.1	tonoplast intrinsic protein 2	7.11462	1	31	1	1	253	25.8	5.06	0	High	0	178	1
FALSE	Master Protein	AT3G57520.1	seed imbibition 2	34.5408	21	47	19	1	773	85.1	5.73	0	High	0	177.97	21
FALSE	Master Protein	AT3G08740.1	elongation factor P (EF-P) family protein	48.7288	12	48	12	1	236	26.2	8.4	0	High	0	177.94	12
FALSE	Master Protein	AT1G30470.1	SIT4 phosphatase-associated family protein	30.3329	23	50	23	1	811	89.8	4.55	0	High	0	177.78	23
FALSE	Master Protein	AT4G33760.1	tRNA synthetase class II (D, K and N) family protein	40.9639	23	44	23	1	664	74.5	7.18	0	High	0	177.78	23
FALSE	Master Protein	AT1G65010.1	Plant protein of unknown function (DUF827)	34.4238	38	51	37	1	1345	152.6	4.94	1	High	0	177.74	38
FALSE	Master Protein	AT2G23600.1	acetone-cyanohydrin lyase	34.981	7	45	7	1	263	29.6	5.34	0	High	0	177.64	7
FALSE	Master Protein	AT4G33030.1	sulfoquinovosyldiacylglycerol 1	34.8008	16	48	16	1	477	53.1	8.19	0	High	0	177.53	16
FALSE	Master Protein	AT5G38480.1	general regulatory factor 3	55.6863	14	48	6	1	255	28.6	4.79	2	High	0	177.3	14
FALSE	Master Protein	AT5G05170.1	Cellulose synthase family protein	32.5822	27	48	22	1	1065	119.6	7.56	5	High	0	177.29	27
FALSE	Master Protein	AT1G16080.1	unknown protein; LOCATED IN: apoplast, chloroplast stroma, chloroplast, chloroplast envelope; EXPRESSED IN: 23 plant structures; EXPRESSED DURING: 14 growth stages; Has 81 Blast hits to 81 proteins in 28 species: Archae - 0; Bacteria - 2; Metazoa - 0; Fungi - 0; Plants - 62; Viruses - 0; Other Eukaryotes - 17 (source: NCBI BLink).	56.869	15	43	15	1	313	34.1	6.79	0	High	0	177.22	15
FALSE	Master Protein	AT3G59980.1	Nucleic acid-binding, OB-fold-like protein	48.3516	13	48	13	1	273	29.7	7.87	0	High	0	176.89	13
FALSE	Master Protein	AT3G60190.1	DYNAMIN-like 1E	47.1154	27	52	15	1	624	69.8	7.52	0	High	0	176.79	27
FALSE	Master Protein	AT1G11750.2	CLP protease proteolytic subunit 6	40.1384	9	40	9	1	289	31.3	9.28	0	High	0	176.75	9
FALSE	Master Protein	AT1G76100.1	plastocyanin 1	14.0351	1	29	1	1	171	17.6	5.95	0	High	0	176.75	1
FALSE	Master Protein	AT1G06550.1	ATP-dependent caseinolytic (Clp) protease/crotonase family protein	61.2403	23	49	23	1	387	43.2	5.55	0	High	0	176.61	23
FALSE	Master Protein	AT3G21720.1	isocitrate lyase	47.0486	21	47	21	1	576	64.2	7.2	0	High	0	176.58	21
FALSE	Master Protein	AT2G45770.2	signal recognition particle receptor protein, chloroplast (FTSY)	42.3592	14	44	14	1	373	40.4	7.25	0	High	0	176.51	14
FALSE	Master Protein	AT5G04230.2	phenyl alanine ammonia-lyase 3	36.1032	22	48	19	1	698	76.6	6.51	1	High	0	176.47	22
FALSE	Master Protein	AT1G33680.1	KH domain-containing protein	28.7025	18	46	17	1	763	80.4	4.82	1	High	0	176.11	18
FALSE	Master Protein	AT5G23020.1	2-isopropylmalate synthase 2	42.5447	21	47	18	1	503	55.2	7.17	3	High	0	175.82	21
FALSE	Master Protein	AT4G26110.1	nucleosome assembly protein1;1	54.3011	18	50	14	1	372	43	4.5	1	High	0	175.7	18
FALSE	Master Protein	AT5G62300.2	Ribosomal protein S10p/S20e family protein	44.3548	8	48	1	1	124	13.9	9.72	7	High	0	175.68	8
FALSE	Master Protein	AT5G18230.2	transcription regulator NOT2/NOT3/NOT5 family protein	31.2426	20	46	1	1	845	93.2	5.5	0	High	0	175.27	20
FALSE	Master Protein	AT5G61510.1	GroES-like zinc-binding alcohol dehydrogenase family protein	46.798	13	46	13	1	406	44	8.4	0	High	0	175.1	13
FALSE	Master Protein	AT5G16840.2	binding partner of acd11 1	41.9231	8	43	7	1	260	27.3	5.63	0	High	0	175.06	8
FALSE	Master Protein	AT4G01610.1	Cysteine proteinases superfamily protein	34.8189	10	39	9	1	359	39.4	6.18	0	High	0	175	10
FALSE	Master Protein	AT2G44490.1	Glycosyl hydrolase superfamily protein	42.8571	18	47	18	1	560	63.9	5.96	0	High	0	174.75	18
FALSE	Master Protein	AT4G12730.1	FASCICLIN-like arabinogalactan 2	33.4988	9	42	9	1	403	43.4	6.62	0	High	0	174.64	9
FALSE	Master Protein	AT2G29190.1	pumilio 2	28.2922	28	53	6	1	972	106.6	6.09	22	High	0	174.6	28
FALSE	Master Protein	AT3G01310.2	Phosphoglycerate mutase-like family protein	34.4762	28	44	28	1	1050	118.8	5.91	0	High	0	174.57	28
FALSE	Master Protein	AT3G16830.1	TOPLESS-related 2	29.443	29	50	21	1	1131	124.7	7.27	1	High	0	174.46	29
FALSE	Master Protein	AT4G17530.1	RAB GTPase homolog 1C	58.4158	11	51	2	1	202	22.3	5.43	7	High	0	174.44	11
FALSE	Master Protein	AT2G22990.3	sinapoylglucose 1	25.3275	12	46	12	1	458	52.1	6.98	0	High	0	174.26	12
FALSE	Master Protein	AT2G19540.1	Transducin family protein / WD-40 repeat family protein	30.064	12	41	12	1	469	51.4	5.06	0	High	0	174.22	12
FALSE	Master Protein	AT3G25150.2	Nuclear transport factor 2 (NTF2) family protein with RNA binding (RRM-RBD-RNP motifs) domain	37.8194	17	42	17	1	587	64.3	7.85	0	High	0	174.12	17
FALSE	Master Protein	AT5G45680.1	FK506-binding protein 13	29.8077	6	51	6	1	208	22	8.69	0	High	0	173.92	6
FALSE	Master Protein	AT3G56860.4	UBP1-associated protein 2A	46.2343	17	45	13	1	478	51.4	5.16	4	High	0	173.8	17
FALSE	Master Protein	AT2G16570.1	GLN phosphoribosyl pyrophosphate amidotransferase 1	30.3887	15	46	6	1	566	61.8	6.23	0	High	0	173.64	15
FALSE	Master Protein	AT1G12050.1	fumarylacetoacetase, putative	35.3919	12	47	12	1	421	46.1	5.55	0	High	0	173.58	12
FALSE	Master Protein	AT1G74790.1	catalytics	20.4317	15	47	14	1	695	75.2	5.52	1	High	0	173.55	15
FALSE	Master Protein	AT1G14320.1	Ribosomal protein L16p/L10e family protein	52.2727	13	48	3	1	220	24.9	10.49	10	High	0	173.48	13
FALSE	Master Protein	AT5G20990.1	molybdopterin biosynthesis CNX1 protein / molybdenum cofactor biosynthesis enzyme CNX1 (CNX1)	42.0896	24	48	24	1	670	71.2	6.28	0	High	0	173.43	24
FALSE	Master Protein	AT3G44880.1	Pheophorbide a oxygenase family protein with Rieske [2Fe-2S] domain	35.0093	15	45	15	1	537	60.7	7.49	0	High	0	173.3	15
FALSE	Master Protein	AT2G05380.1	glycine-rich protein 3 short isoform	62.931	6	37	5	1	116	11.6	8.03	1	High	0	173.28	6
FALSE	Master Protein	AT3G22520.1	unknown protein; INVOLVED IN: biological_process unknown; LOCATED IN: chloroplast stroma, chloroplast, chloroplast envelope; EXPRESSED IN: 24 plant structures; EXPRESSED DURING: 13 growth stages; BEST Arabidopsis thaliana protein match is: unknown protein (TAIR:AT4G14840.1); Has 717 Blast hits to 703 proteins in 179 species: Archae - 14; Bacteria - 134; Metazoa - 141; Fungi - 74; Plants - 209; Vi…	39	21	49	18	1	600	67.5	5.4	3	High	0	173.23	21
FALSE	Master Protein	AT3G54540.1	general control non-repressible 4	36.6528	22	44	22	1	723	80.4	6.32	0	High	0	173.04	22
FALSE	Master Protein	AT2G43710.1	Plant stearoyl-acyl-carrier-protein desaturase family protein	40.6484	13	45	7	1	401	45.7	6.48	6	High	0	172.95	13
FALSE	Master Protein	AT5G23540.1	Mov34/MPN/PAD-1 family protein	36.3636	11	47	11	1	308	34.3	6.8	0	High	0	172.89	11
FALSE	Master Protein	AT3G27820.1	monodehydroascorbate reductase 4	53.0738	27	46	27	1	488	53.5	8.22	0	High	0	172.79	27
FALSE	Master Protein	AT4G27585.1	SPFH/Band 7/PHB domain-containing membrane-associated protein family	49.3917	20	50	15	1	411	45	6.81	5	High	0	172.71	20
FALSE	Master Protein	AT2G38700.1	mevalonate diphosphate decarboxylase 1	38.5922	16	46	9	1	412	45.6	6.8	7	High	0	172.71	16
FALSE	Master Protein	AT4G37200.1	Thioredoxin superfamily protein	43.295	10	42	10	1	261	28.7	5.38	0	High	0	172.7	10
FALSE	Master Protein	AT3G50670.1	U1 small nuclear ribonucleoprotein-70K	39.3443	16	48	16	1	427	50.4	9.39	0	High	0	172.65	16
FALSE	Master Protein	AT4G19210.1	RNAse l inhibitor protein 2	36.0331	21	49	21	1	605	68.3	7.96	0	High	0	172.46	21
FALSE	Master Protein	AT1G76850.1	exocyst complex component sec5	27.0642	28	49	21	1	1090	121.8	5.8	7	High	0	172.4	28
FALSE	Master Protein	AT4G36750.1	Quinone reductase family protein	52.381	9	35	9	1	273	28.7	5.34	0	High	0	172.35	9
FALSE	Master Protein	AT4G21100.1	damaged DNA binding protein 1B	24.8162	25	50	10	1	1088	121.1	5.31	0	High	0	172.31	25
FALSE	Master Protein	AT4G31430.2	unknown protein; LOCATED IN: plasma membrane; EXPRESSED IN: 25 plant structures; EXPRESSED DURING: 15 growth stages; Has 35333 Blast hits to 34131 proteins in 2444 species: Archae - 798; Bacteria - 22429; Metazoa - 974; Fungi - 991; Plants - 531; Viruses - 0; Other Eukaryotes - 9610 (source: NCBI BLink).	37.9791	18	44	17	1	574	61.1	5.57	1	High	0	172.17	18
FALSE	Master Protein	AT2G45540.2	WD-40 repeat family protein / beige-related	12.2959	27	47	27	1	3001	327.9	5.91	0	High	0	172.14	27
FALSE	Master Protein	AT4G13200.1	unknown protein; FUNCTIONS IN: molecular_function unknown; INVOLVED IN: biological_process unknown; LOCATED IN: thylakoid, chloroplast thylakoid membrane, chloroplast, plastoglobule; EXPRESSED IN: 22 plant structures; EXPRESSED DURING: 13 growth stages; Has 97 Blast hits to 97 proteins in 46 species: Archae - 0; Bacteria - 65; Metazoa - 2; Fungi - 0; Plants - 28; Viruses - 0; Other Eukaryotes - 2…	53.5135	8	42	8	1	185	20.4	5.3	0	High	0	172.12	8
FALSE	Master Protein	AT2G37970.1	SOUL heme-binding family protein	65.7778	16	50	16	1	225	24.9	8.81	0	High	0	172.1	16
FALSE	Master Protein	AT2G44760.1	Domain of unknown function (DUF3598)	35.4	15	43	15	1	500	55.8	6.3	0	High	0	172.09	15
FALSE	Master Protein	AT1G07320.1	ribosomal protein L4	52.4823	13	48	1	1	282	30.5	8.94	0	High	0	172.07	13
FALSE	Master Protein	AT2G47000.1	ATP binding cassette subfamily B4	23.0171	26	46	14	1	1286	138.9	6.55	12	High	0	171.83	26
FALSE	Master Protein	AT1G48420.1	D-cysteine desulfhydrase	41.3965	13	42	13	1	401	43.9	7.36	0	High	0	171.79	13
FALSE	Master Protein	AT1G06000.1	UDP-Glycosyltransferase superfamily protein	31.0345	14	44	14	1	435	48.1	6.18	0	High	0	171.74	14
FALSE	Master Protein	AT1G32900.1	UDP-Glycosyltransferase superfamily protein	40.9836	21	44	21	1	610	66.8	8.53	0	High	0	171.56	21
FALSE	Master Protein	AT1G32440.1	plastidial pyruvate kinase 3	36.9527	17	49	15	1	571	62.6	7.81	0	High	0	171.42	17
FALSE	Master Protein	AT1G68060.1	microtubule-associated proteins 70-1	31.3505	22	49	9	1	622	69.2	8.6	0	High	0	171.36	22
FALSE	Master Protein	AT5G12110.1	Glutathione S-transferase, C-terminal-like;Translation elongation factor EF1B/ribosomal protein S6	35.0877	7	46	4	1	228	24.8	4.69	0	High	0	171.36	7
FALSE	Master Protein	AT5G21160.3	LA RNA-binding protein	31.8127	23	45	23	1	833	92.3	8.62	0	High	0	171.22	23
FALSE	Master Protein	AT1G75680.1	glycosyl hydrolase 9B7	33.9048	17	46	17	1	525	57.8	7.23	0	High	0	171.2	17
FALSE	Master Protein	AT2G39470.1	PsbP-like protein 2	49.5798	11	43	11	1	238	26.9	8.75	0	High	0	171.16	11
FALSE	Master Protein	AT5G47760.1	2-phosphoglycolate phosphatase 2	36.8771	8	43	7	1	301	33	5.2	0	High	0	171.15	8
FALSE	Master Protein	AT4G37980.1	elicitor-activated gene 3-1	58.5434	16	46	16	1	357	38.2	7.2	0	High	0	171.02	16
FALSE	Master Protein	AT1G10580.1	Transducin/WD40 repeat-like superfamily protein	43.63	22	46	22	1	573	65.1	7.08	0	High	0	170.86	22
FALSE	Master Protein	AT1G01080.2	RNA-binding (RRM/RBD/RNP motifs) family protein	47.9592	14	44	14	1	294	32.7	8.9	0	High	0	170.71	14
FALSE	Master Protein	AT4G16390.1	pentatricopeptide (PPR) repeat-containing protein	33.6182	20	45	20	1	702	78.2	6.23	0	High	0	170.63	20
FALSE	Master Protein	AT5G17530.3	phosphoglucosamine mutase family protein	38.7622	18	43	18	1	614	66.9	6.55	0	High	0	170.51	18
FALSE	Master Protein	AT1G76450.1	Photosystem II reaction center PsbP family protein	41.2955	7	38	7	1	247	27.5	6.8	0	High	0	170.43	7
FALSE	Master Protein	AT4G27870.1	Vacuolar iron transporter (VIT) family protein	30.2234	15	36	14	1	761	82.5	4.79	0	High	0	170.37	15
FALSE	Master Protein	AT5G66720.1	Protein phosphatase 2C family protein	21.4976	8	42	8	1	414	43.8	7.69	0	High	0	170.26	8
FALSE	Master Protein	AT5G47480.1	RGPR-related	27.6296	28	48	25	1	1350	145.8	5.06	3	High	0	170.2	28
FALSE	Master Protein	AT1G09430.1	ATP-citrate lyase A-3	43.3962	16	45	11	1	424	46.9	5.26	0	High	0	169.48	16
FALSE	Master Protein	AT3G56650.1	Mog1/PsbP/DUF1795-like photosystem II reaction center PsbP family protein	58.3969	12	45	12	1	262	28.6	9.26	0	High	0	169.47	12
FALSE	Master Protein	AT5G65020.1	annexin 2	53.9432	13	43	13	1	317	36.2	6.1	0	High	0	169.47	13
FALSE	Master Protein	AT1G66580.1	senescence associated gene 24	52.0362	12	47	4	1	221	24.9	10.56	1	High	0	169.32	12
FALSE	Master Protein	AT1G26550.1	FKBP-like peptidyl-prolyl cis-trans isomerase family protein	68.3099	8	45	8	1	142	14.8	9.52	0	High	0	169.19	8
FALSE	Master Protein	AT3G56310.1	Melibiase family protein	31.1213	11	42	11	1	437	48.3	4.92	0	High	0	169.15	11
FALSE	Master Protein	AT1G07110.1	fructose-2,6-bisphosphatase	32.5269	21	48	21	1	744	82.5	6.29	0	High	0	169.01	21
FALSE	Master Protein	AT1G72550.1	tRNA synthetase beta subunit family protein	44.9833	23	46	23	1	598	67.5	5.3	0	High	0	168.97	23
FALSE	Master Protein	AT2G05830.1	NagB/RpiA/CoA transferase-like superfamily protein	58.2888	17	44	17	1	374	39.6	6.3	0	High	0	168.82	17
FALSE	Master Protein	AT5G64130.3	cAMP-regulated phosphoprotein 19-related protein	65.7143	9	40	8	1	140	15.1	7.94	1	High	0	168.81	9
FALSE	Master Protein	AT3G26618.1	eukaryotic release factor 1-3	30.8046	12	49	2	1	435	49	5.5	10	High	0	168.75	12
FALSE	Master Protein	AT3G07720.1	Galactose oxidase/kelch repeat superfamily protein	51.9757	11	42	11	1	329	35.7	5.22	0	High	0	168.66	11
FALSE	Master Protein	AT4G17170.1	RAB GTPase homolog B1C	69.6682	12	42	7	1	211	23.2	7.42	5	High	0	168.59	12
FALSE	Master Protein	AT3G54640.1	tryptophan synthase alpha chain	51.2821	9	36	8	1	312	33.2	7.28	1	High	0	168.57	9
FALSE	Master Protein	AT1G12780.1	UDP-D-glucose/UDP-D-galactose 4-epimerase 1	46.7236	14	43	9	1	351	39.1	6.57	6	High	0	168.57	14
FALSE	Master Protein	AT5G42480.1	Chaperone DnaJ-domain superfamily protein	35.3308	22	44	22	1	801	88.2	4.89	0	High	0	168.29	22
FALSE	Master Protein	AT3G19390.1	Granulin repeat cysteine protease family protein	35.177	10	41	10	1	452	49.3	5.74	0	High	0	168.15	10
FALSE	Master Protein	AT1G31190.1	myo-inositol monophosphatase like 1	36.1186	9	42	9	1	371	40.4	7.24	0	High	0	168.14	9
FALSE	Master Protein	AT1G54170.1	CTC-interacting domain 3	42.4191	20	47	17	1	587	65.3	5.12	0	High	0	168.11	20
FALSE	Master Protein	AT2G33410.1	RNA-binding (RRM/RBD/RNP motifs) family protein	49.0099	13	40	13	1	404	41.3	6.55	0	High	0	168.02	13
FALSE	Master Protein	AT4G27320.1	Adenine nucleotide alpha hydrolases-like superfamily protein	48.4615	12	39	10	1	260	28.1	6.25	2	High	0	167.96	12
FALSE	Master Protein	AT4G21660.1	proline-rich spliceosome-associated (PSP) family protein	39.5548	16	42	16	1	584	66.8	5.21	0	High	0	167.94	16
FALSE	Master Protein	AT2G36060.2	MMS ZWEI homologue 3	80.137	11	45	7	1	146	16.6	7.03	6	High	0	167.8	11
FALSE	Master Protein	AT1G03870.1	FASCICLIN-like arabinoogalactan 9	27.5304	6	46	5	1	247	26.1	8.88	0	High	0	167.65	6
FALSE	Master Protein	AT1G26230.1	TCP-1/cpn60 chaperonin family protein	39.7709	22	50	19	1	611	66.8	9.16	0	High	0	167.42	22
FALSE	Master Protein	AT1G10670.1	ATP-citrate lyase A-1	39.7163	18	46	13	1	423	46.6	5.5	5	High	0	167.39	18
FALSE	Master Protein	AT3G53130.1	Cytochrome P450 superfamily protein	37.2913	19	49	19	1	539	60.5	6.39	0	High	0	167.31	19
FALSE	Master Protein	AT1G51110.1	Plastid-lipid associated protein PAP / fibrillin family protein	36.1858	13	44	13	1	409	45.7	7.94	0	High	0	167.18	13
FALSE	Master Protein	AT1G14030.1	Rubisco methyltransferase family protein	41.2863	18	44	18	1	482	54.6	5.1	0	High	0	167.06	18
FALSE	Master Protein	AT3G07110.2	Ribosomal protein L13 family protein	55.5556	13	50	4	1	207	23.6	10.4	10	High	0	166.99	13
FALSE	Master Protein	AT1G73060.1	Low PSII Accumulation 3	36.8715	11	42	11	1	358	40	5.22	0	High	0	166.85	11
FALSE	Master Protein	AT5G35170.1	adenylate kinase family protein	40.6463	20	45	19	1	588	65.7	8.69	1	High	0	166.74	20
FALSE	Master Protein	AT1G15500.1	TLC ATP/ADP transporter	27.0227	13	45	5	1	618	67.5	9.48	0	High	0	166.7	13
FALSE	Master Protein	AT1G11870.2	Seryl-tRNA synthetase	42.0233	20	42	19	1	514	57.3	6.95	0	High	0	166.64	20
FALSE	Master Protein	AT1G32500.1	non-intrinsic ABC protein 6	37.8947	16	44	16	1	475	52.8	5.97	0	High	0	166.55	16
FALSE	Master Protein	AT2G29200.1	pumilio 1	25.2066	24	47	3	1	968	106.5	6.13	0	High	0	166.29	24
FALSE	Master Protein	AT3G46830.1	RAB GTPase homolog A2C	75.576	15	43	7	1	217	23.8	6.23	8	High	0	166.23	15
FALSE	Master Protein	AT5G14800.1	pyrroline-5- carboxylate (P5C) reductase	51.087	12	44	12	1	276	28.6	8.09	0	High	0	166.15	12
FALSE	Master Protein	AT5G48180.1	nitrile specifier protein 5	52.454	14	43	14	1	326	35.8	5.19	0	High	0	165.92	14
FALSE	Master Protein	AT1G53580.1	glyoxalase II 3	45.5782	10	39	10	1	294	32.3	7.01	0	High	0	165.75	10
FALSE	Master Protein	AT2G17840.1	Senescence/dehydration-associated protein-related	48.2301	15	40	15	1	452	49	5.41	0	High	0	165.75	15
FALSE	Master Protein	AT2G29140.1	pumilio 3	24.3776	24	48	3	1	964	105.9	6.2	3	High	0	165.74	24
FALSE	Master Protein	AT1G31180.1	isopropylmalate dehydrogenase 3	43.0693	13	45	7	1	404	43.8	5.82	2	High	0	165.69	13
FALSE	Master Protein	AT1G80300.1	nucleotide transporter 1	27.2436	14	46	6	1	624	68.1	9.35	9	High	0	165.59	14
FALSE	Master Protein	AT5G03520.1	RAB GTPase homolog 8C	60.1852	13	46	3	1	216	24	7.81	10	High	0	165.54	13
FALSE	Master Protein	AT3G54110.1	plant uncoupling mitochondrial protein 1	50	14	46	14	1	306	32.6	9.57	0	High	0	165.53	14
FALSE	Master Protein	AT2G20610.1	Tyrosine transaminase family protein	43.0736	18	42	17	1	462	51.1	5.91	1	High	0	165.47	18
FALSE	Master Protein	AT1G77120.1	alcohol dehydrogenase 1	51.9789	16	45	16	1	379	41.2	6.24	0	High	0	165.28	16
FALSE	Master Protein	AT1G17160.1	pfkB-like carbohydrate kinase family protein	33.7731	12	42	12	1	379	40.2	6.55	0	High	0	165.03	12
FALSE	Master Protein	AT4G23680.1	Polyketide cyclase/dehydrase and lipid transport superfamily protein	50.9934	10	52	9	1	151	17.5	6.34	2	High	0	164.73	10
FALSE	Master Protein	AT4G38350.2	Patched family protein	18.5042	20	41	16	1	1297	142.6	5.33	4	High	0	164.64	20
FALSE	Master Protein	AT5G40870.1	uridine kinase/uracil phosphoribosyltransferase 1	61.3169	22	44	12	1	486	54.4	6.61	12	High	0	164.51	22
FALSE	Master Protein	AT5G03880.1	Thioredoxin family protein	42.4779	11	43	11	1	339	37	8.88	0	High	0	164.38	11
FALSE	Master Protein	AT3G27300.1	glucose-6-phosphate dehydrogenase 5	47.6744	24	51	18	1	516	59.1	8.31	6	High	0	164.38	24
FALSE	Master Protein	AT3G15970.1	NUP50 (Nucleoporin 50 kDa) protein	48.172	22	46	22	1	465	49.1	4.84	0	High	0	164.38	22
FALSE	Master Protein	AT1G26910.1	Ribosomal protein L16p/L10e family protein	44.7964	11	46	1	1	221	24.9	10.43	0	High	0	164.34	11
FALSE	Master Protein	AT2G29080.1	FTSH protease 3	32.0148	22	43	14	1	809	89.3	7.27	8	High	0	163.9	22
FALSE	Master Protein	AT4G14300.1	RNA-binding (RRM/RBD/RNP motifs) family protein	37.9562	11	40	11	1	411	42.3	5.9	0	High	0	163.88	11
FALSE	Master Protein	AT3G25520.1	ribosomal protein L5	55.1495	18	47	4	1	301	34.3	9.31	0	High	0	163.82	18
FALSE	Master Protein	AT5G55230.1	microtubule-associated proteins 65-1	32.0273	16	41	13	1	587	65.7	5.06	3	High	0	163.79	16
FALSE	Master Protein	AT1G07320.4	ribosomal protein L4	51.7986	13	46	1	1	278	30.1	9.26	13	High	0	163.43	13
FALSE	Master Protein	AT4G32285.2	ENTH/ANTH/VHS superfamily protein	38.7402	19	42	13	1	635	70.5	6.11	0	High	0	163.3	19
FALSE	Master Protein	AT1G79470.1	Aldolase-type TIM barrel family protein	32.6044	12	43	8	1	503	54.2	6.8	0	High	0	163.25	12
FALSE	Master Protein	AT1G03680.1	thioredoxin M-type 1	36.3128	6	42	6	1	179	19.7	8.95	0	High	0	163.14	6
FALSE	Master Protein	AT1G49750.1	Leucine-rich repeat (LRR) family protein	24.6964	16	47	16	1	494	54.4	8.1	0	High	0	163.13	16
FALSE	Master Protein	AT2G44640.1	FUNCTIONS IN: molecular_function unknown; INVOLVED IN: biological_process unknown; LOCATED IN: mitochondrion, chloroplast, plasma membrane, plastid, chloroplast envelope; EXPRESSED IN: 23 plant structures; EXPRESSED DURING: 13 growth stages; CONTAINS InterPro DOMAIN/s: Protein of unknown function DUF3769 (InterPro:IPR022244); BEST Arabidopsis thaliana protein match is: pigment defective 320 (TAIR…	52.5499	17	41	17	1	451	49.8	8.73	0	High	0	163.1	17
FALSE	Master Protein	AT5G65690.1	phosphoenolpyruvate carboxykinase 2	18.3582	12	41	5	1	670	72.8	6.42	0	High	0	162.95	12
FALSE	Master Protein	AT1G17720.2	Protein phosphatase 2A, regulatory subunit PR55	42.6	18	44	1	1	500	56.1	5.82	17	High	0	162.95	18
FALSE	Master Protein	AT5G13370.1	Auxin-responsive GH3 family protein	34.2857	17	41	12	1	595	66.9	5.71	5	High	0	162.95	17
FALSE	Master Protein	AT3G62530.1	ARM repeat superfamily protein	61.086	12	42	12	1	221	24.5	6.57	0	High	0	162.84	12
FALSE	Master Protein	AT4G20860.1	FAD-binding Berberine family protein	38.8679	19	45	19	1	530	60.4	9.04	0	High	0	162.79	19
FALSE	Master Protein	AT5G60160.1	Zn-dependent exopeptidases superfamily protein	38.1551	17	46	17	1	477	52.4	6.77	0	High	0	162.71	17
FALSE	Master Protein	AT3G09940.1	monodehydroascorbate reductase	40.5896	15	43	15	1	441	48.3	5.27	0	High	0	162.71	15
FALSE	Master Protein	AT4G05160.1	AMP-dependent synthetase and ligase family protein	36.7647	16	42	15	1	544	59.8	8.46	0	High	0	162.71	16
FALSE	Master Protein	AT1G08680.4	ARF GAP-like zinc finger-containing protein ZIGA4	37.3272	17	39	1	1	651	71.5	5.64	16	High	0	162.37	17
FALSE	Master Protein	AT1G50450.1	Saccharopine dehydrogenase	37.1495	14	44	14	1	428	46.5	8.09	0	High	0	162.28	14
FALSE	Master Protein	AT5G18660.1	NAD(P)-binding Rossmann-fold superfamily protein	35.012	13	43	13	1	417	45.9	7.56	0	High	0	162.22	13
FALSE	Master Protein	AT1G79870.1	D-isomer specific 2-hydroxyacid dehydrogenase family protein	45.0479	14	42	14	1	313	34.1	5.9	0	High	0	162.19	14
FALSE	Master Protein	AT2G20360.1	NAD(P)-binding Rossmann-fold superfamily protein	38.3085	14	45	14	1	402	43.9	9.23	0	High	0	162.08	14
FALSE	Master Protein	AT1G12920.1	eukaryotic release factor 1-2	32.4885	12	47	3	1	434	48.9	5.35	1	High	0	162.03	12
FALSE	Master Protein	AT5G13110.1	glucose-6-phosphate dehydrogenase 2	35.5705	21	48	8	1	596	67.1	8.29	8	High	0	161.99	21
FALSE	Master Protein	AT1G51680.1	4-coumarate:CoA ligase 1	37.7897	20	49	15	1	561	61	5.43	5	High	0	161.97	20
FALSE	Master Protein	AT4G24220.1	NAD(P)-binding Rossmann-fold superfamily protein	36.0825	12	42	12	1	388	44.2	5.2	0	High	0	161.95	12
FALSE	Master Protein	AT5G56740.1	histone acetyltransferase of the GNAT family 2	40.8994	14	41	14	1	467	52.7	5.64	0	High	0	161.9	14
FALSE	Master Protein	AT1G53210.1	sodium/calcium exchanger family protein / calcium-binding EF hand family protein	18.2906	10	40	10	1	585	63.4	5.34	0	High	0	161.85	10
FALSE	Master Protein	AT3G18390.1	CRS1 / YhbY (CRM) domain-containing protein	34.6698	25	47	25	1	848	95.9	6.01	0	High	0	161.82	25
FALSE	Master Protein	AT3G60770.1	Ribosomal protein S13/S15	65.5629	11	48	1	1	151	17.1	10.39	10	High	0	161.58	11
FALSE	Master Protein	AT2G44040.1	Dihydrodipicolinate reductase, bacterial/plant	33.4294	9	43	4	1	347	37.5	6.46	0	High	0	161.34	9
FALSE	Master Protein	AT3G47930.1	L-galactono-1,4-lactone dehydrogenase	40.4918	23	42	23	1	610	68.5	8.56	0	High	0	161.22	23
FALSE	Master Protein	AT2G32060.1	Ribosomal protein L7Ae/L30e/S12e/Gadd45 family protein	58.3333	9	42	6	1	144	15.3	5.9	0	High	0	161.18	9
FALSE	Master Protein	AT1G22780.1	Ribosomal protein S13/S18 family	57.2368	9	38	9	1	152	17.5	10.54	0	High	0	160.76	9
FALSE	Master Protein	AT2G43160.1	ENTH/VHS family protein	23.0168	17	41	15	1	895	95.4	5.96	2	High	0	160.55	17
FALSE	Master Protein	AT3G10370.1	FAD-dependent oxidoreductase family protein	29.5707	17	43	17	1	629	68.4	8	0	High	0	160.25	17
FALSE	Master Protein	AT3G02660.1	Tyrosyl-tRNA synthetase, class Ib, bacterial/mitochondrial	41.683	18	44	18	1	511	56.6	6.38	0	High	0	160.2	18
FALSE	Master Protein	AT1G55500.2	evolutionarily conserved C-terminal region 4	28.5476	18	45	13	1	599	65.9	7.72	0	High	0	160.11	18
FALSE	Master Protein	AT1G01610.1	glycerol-3-phosphate acyltransferase 4	32.8032	14	45	8	1	503	56.2	9.1	0	High	0	159.91	14
FALSE	Master Protein	AT5G44720.1	Molybdenum cofactor sulfurase family protein	49.6753	15	44	15	1	308	34.8	5.64	0	High	0	159.86	15
FALSE	Master Protein	AT3G04770.1	40s ribosomal protein SA B	25	9	43	5	1	332	37.3	9.63	0	High	0	159.83	9
FALSE	Master Protein	AT3G57150.1	homologue of NAP57	47.6106	23	41	23	1	565	63	9.14	0	High	0	159.82	23
FALSE	Master Protein	AT1G51805.1	Leucine-rich repeat protein kinase family protein	26.5837	18	41	14	1	884	98	5.6	3	High	0	159.79	18
FALSE	Master Protein	AT1G19580.1	gamma carbonic anhydrase 1	46.5455	10	41	7	1	275	30	7.59	0	High	0	159.75	10
FALSE	Master Protein	AT3G49720.1	unknown protein; FUNCTIONS IN: molecular_function unknown; INVOLVED IN: biological_process unknown; LOCATED IN: chloroplast thylakoid membrane, Golgi apparatus, plasma membrane, membrane; EXPRESSED IN: 25 plant structures; EXPRESSED DURING: 15 growth stages; BEST Arabidopsis thaliana protein match is: unknown protein (TAIR:AT5G65810.1); Has 64 Blast hits to 64 proteins in 11 species: Archae - 0; …	43.6782	10	39	9	1	261	28.5	9.28	1	High	0	159.6	10
FALSE	Master Protein	AT3G16100.1	RAB GTPase homolog G3C	83.0097	15	44	4	1	206	23	5.52	11	High	0	159.42	15
FALSE	Master Protein	AT3G55760.1	unknown protein; LOCATED IN: chloroplast stroma, chloroplast; EXPRESSED IN: 16 plant structures; EXPRESSED DURING: 10 growth stages; BEST Arabidopsis thaliana protein match is: unknown protein (TAIR:AT1G42430.2); Has 176 Blast hits to 125 proteins in 40 species: Archae - 0; Bacteria - 3; Metazoa - 19; Fungi - 9; Plants - 81; Viruses - 0; Other Eukaryotes - 64 (source: NCBI BLink).	40.3114	20	43	20	1	578	65.5	5.49	0	High	0	159.39	20
FALSE	Master Protein	AT1G08450.1	calreticulin 3	41.0377	15	42	15	1	424	49.8	6.13	0	High	0	159.25	15
FALSE	Master Protein	AT3G28860.1	ATP binding cassette subfamily B19	25.9585	25	45	23	1	1252	136.7	8.22	0	High	0	159.04	25
FALSE	Master Protein	AT5G20960.1	aldehyde oxidase 1	18.348	23	43	21	1	1368	149.5	6.4	0	High	0	158.9	23
FALSE	Master Protein	AT1G24764.1	microtubule-associated proteins 70-2	35.1735	24	45	11	1	634	70.2	7.09	13	High	0	158.86	24
FALSE	Master Protein	AT4G20960.1	Cytidine/deoxycytidylate deaminase family protein	47.8873	16	40	16	1	426	46.6	6.46	0	High	0	158.67	16
FALSE	Master Protein	AT3G55120.1	Chalcone-flavanone isomerase family protein	46.748	10	45	10	1	246	26.6	5.5	0	High	0	158.59	10
FALSE	Master Protein	AT3G17900.1	unknown protein; FUNCTIONS IN: molecular_function unknown; INVOLVED IN: biological_process unknown; LOCATED IN: cellular_component unknown; EXPRESSED IN: 23 plant structures; EXPRESSED DURING: 13 growth stages; Has 45 Blast hits to 44 proteins in 14 species: Archae - 0; Bacteria - 0; Metazoa - 2; Fungi - 2; Plants - 39; Viruses - 0; Other Eukaryotes - 2 (source: NCBI BLink).	33.0549	22	43	22	1	838	91.5	5.78	0	High	0	158.54	22
FALSE	Master Protein	AT2G16640.1	multimeric translocon complex in the outer envelope membrane 132	25.3731	25	42	18	1	1206	132.2	4.86	7	High	0	158.28	25
FALSE	Master Protein	AT1G78150.3	unknown protein; FUNCTIONS IN: molecular_function unknown; INVOLVED IN: biological_process unknown; EXPRESSED IN: 23 plant structures; EXPRESSED DURING: 13 growth stages; BEST Arabidopsis thaliana protein match is: unknown protein (TAIR:AT1G35780.1).	42.5743	11	39	9	1	303	33.1	6.04	1	High	0	158.27	11
FALSE	Master Protein	AT3G06300.1	P4H isoform 2	53.5117	15	45	8	1	299	33	6.35	0	High	0	158.26	15
FALSE	Master Protein	AT5G50210.1	quinolinate synthase	28.9694	18	43	18	1	718	78.9	6.87	0	High	0	158.07	18
FALSE	Master Protein	AT5G60790.1	ABC transporter family protein	34.4538	18	43	18	1	595	66.8	6.46	0	High	0	158.03	18
FALSE	Master Protein	AT1G75330.1	ornithine carbamoyltransferase	33.0667	11	39	11	1	375	41	7.56	0	High	0	158.02	11
FALSE	Master Protein	AT1G02780.1	Ribosomal protein L19e family protein	41.1215	8	42	3	1	214	24.6	11.36	5	High	0	157.94	8
FALSE	Master Protein	AT3G20790.1	NAD(P)-binding Rossmann-fold superfamily protein	46.4789	14	42	14	1	355	38.6	5.74	0	High	0	157.6	14
FALSE	Master Protein	AT5G46420.1	16S rRNA processing protein RimM family	34.7626	19	41	19	1	653	73.7	5.87	0	High	0	157.46	19
FALSE	Master Protein	AT1G69200.1	fructokinase-like 2	36.8506	17	40	17	1	616	69.2	5.24	0	High	0	157.39	17
FALSE	Master Protein	AT2G42500.1	protein phosphatase 2A-3	40.8946	10	37	1	1	313	35.8	5.16	0	High	0	157.28	10
FALSE	Master Protein	AT3G02080.1	Ribosomal protein S19e family protein	78.3217	12	45	6	1	143	15.8	10.08	6	High	0	157.25	12
FALSE	Master Protein	AT2G38550.1	Transmembrane proteins 14C	28.9552	12	41	12	1	335	36.7	7.53	0	High	0	157.03	12
FALSE	Master Protein	AT3G61050.1	Calcium-dependent lipid-binding (CaLB domain) family protein	38.8235	14	45	14	1	510	55.1	8.21	0	High	0	156.99	14
FALSE	Master Protein	AT5G08650.1	Small GTP-binding protein	30.2496	18	42	17	1	681	75.4	6.68	1	High	0	156.99	18
FALSE	Master Protein	AT5G53480.1	ARM repeat superfamily protein	25.2874	20	44	20	1	870	96.2	4.81	0	High	0	156.9	20
FALSE	Master Protein	AT5G12040.1	Nitrilase/cyanide hydratase and apolipoprotein N-acyltransferase family protein	37.1274	13	42	13	1	369	40.3	8.56	0	High	0	156.89	13
FALSE	Master Protein	AT3G11560.4	LETM1-like protein	28.4404	20	43	17	1	872	97.7	6.87	3	High	0	156.69	20
FALSE	Master Protein	AT4G18370.1	DEGP protease 5	37.4613	11	37	11	1	323	34.9	5.31	0	High	0	156.59	11
FALSE	Master Protein	AT1G04690.1	potassium channel beta subunit 1	34.7561	12	45	12	1	328	36.5	7.42	0	High	0	156.59	12
FALSE	Master Protein	AT1G03160.1	FZO-like	34.3202	23	40	23	1	912	100.7	5.92	0	High	0	156.56	23
FALSE	Master Protein	AT4G00620.1	Amino acid dehydrogenase family protein	50.8333	15	43	15	1	360	38.7	8.28	0	High	0	156.55	15
FALSE	Master Protein	AT1G10390.1	Nucleoporin autopeptidase	17.4832	18	41	18	1	1041	106.2	8.79	0	High	0	156.51	18
FALSE	Master Protein	AT4G29900.1	autoinhibited Ca(2+)-ATPase 10	26.0056	25	44	22	1	1069	116.8	6.24	0	High	0	156.27	25
FALSE	Master Protein	AT5G64860.1	disproportionating enzyme	29.8611	16	43	16	1	576	64.4	5.69	0	High	0	156.27	16
FALSE	Master Protein	AT4G09040.1	RNA-binding (RRM/RBD/RNP motifs) family protein	36.1842	9	37	9	1	304	34	7.59	0	High	0	156.26	9
FALSE	Master Protein	AT3G57330.1	autoinhibited Ca2+-ATPase 11	25.2683	22	42	13	1	1025	111.9	6.34	0	High	0	156.13	22
FALSE	Master Protein	AT2G45790.1	phosphomannomutase	57.3171	14	41	14	1	246	27.7	5.54	0	High	0	155.92	14
FALSE	Master Protein	AT4G16660.1	heat shock protein 70 (Hsp 70) family protein	30.2191	26	47	25	1	867	96.7	6.14	1	High	0	155.92	26
FALSE	Master Protein	AT1G16920.1	RAB GTPase homolog A1B	55.0926	12	42	6	1	216	24	5.77	5	High	0	155.92	12
FALSE	Master Protein	AT4G17300.1	Class II aminoacyl-tRNA and biotin synthetases superfamily protein	28.9242	16	44	16	1	567	63.7	6.05	0	High	0	155.64	16
FALSE	Master Protein	AT4G36250.1	aldehyde dehydrogenase 3F1	33.8843	16	43	16	1	484	53.6	8.07	0	High	0	155.63	16
FALSE	Master Protein	AT3G10670.1	non-intrinsic ABC protein 7	37.2781	12	40	12	1	338	36.9	7.14	0	High	0	155.56	12
FALSE	Master Protein	AT1G72880.1	Survival protein SurE-like phosphatase/nucleotidase	34.8052	11	37	11	1	385	40.6	5.48	0	High	0	155.52	11
FALSE	Master Protein	AT3G48500.2	Nucleic acid-binding, OB-fold-like protein	30.1291	19	42	19	1	697	82.4	5.16	0	High	0	155.45	19
FALSE	Master Protein	AT3G11450.1	DnaJ domain ;Myb-like DNA-binding domain	38.0216	22	40	18	1	647	73.9	8.5	4	High	0	155.26	22
FALSE	Master Protein	AT5G52560.1	UDP-sugar pyrophosphorylase	35.6678	21	47	21	1	614	67.8	6.49	0	High	0	155.22	21
FALSE	Master Protein	AT1G08680.2	ARF GAP-like zinc finger-containing protein ZIGA4	37.3457	17	38	1	1	648	71.2	5.64	0	High	0	155.11	17
FALSE	Master Protein	AT3G13570.1	SC35-like splicing factor 30A	22.9008	5	42	4	1	262	30.2	11.68	0	High	0	155.09	5
FALSE	Master Protein	AT5G59290.2	UDP-glucuronic acid decarboxylase 3	46.7787	16	42	7	1	357	40.2	8.35	7	High	0	155.09	16
FALSE	Master Protein	AT1G29660.1	GDSL-like Lipase/Acylhydrolase superfamily protein	47.8022	12	36	12	1	364	40.1	5.36	0	High	0	155.08	12
FALSE	Master Protein	AT1G54100.2	aldehyde dehydrogenase 7B4	34.6457	14	44	14	1	508	54.2	5.54	0	High	0	155.06	14
FALSE	Master Protein	AT5G02530.1	RNA-binding (RRM/RBD/RNP motifs) family protein	31.8493	13	39	12	1	292	30.8	9.98	0	High	0	154.98	13
FALSE	Master Protein	AT1G02280.2	translocon at the outer envelope membrane of chloroplasts 33	55.2189	16	43	14	1	297	32.9	9.06	2	High	0	154.85	16
FALSE	Master Protein	AT5G04130.1	DNA GYRASE B2	33.3333	21	42	11	1	732	81	8.72	10	High	0	154.7	21
FALSE	Master Protein	AT5G64250.2	Aldolase-type TIM barrel family protein	42.6426	13	43	13	1	333	36	5.55	0	High	0	154.64	13
FALSE	Master Protein	AT2G35120.1	Single hybrid motif superfamily protein	62.1795	7	45	6	1	156	17.1	5.11	0	High	0	154.63	7
FALSE	Master Protein	AT3G04600.1	Nucleotidylyl transferase superfamily protein	39.801	14	43	14	1	402	45.7	5.95	0	High	0	154.62	14
FALSE	Master Protein	AT2G02560.1	cullin-associated and neddylation dissociated	18.1296	22	46	22	1	1219	134.8	6.1	0	High	0	154.59	22
FALSE	Master Protein	AT1G44820.1	Peptidase M20/M25/M40 family protein	36.9863	13	41	13	1	438	48.9	5.97	0	High	0	154.5	13
FALSE	Master Protein	AT5G38470.1	Rad23 UV excision repair protein family	38.0952	11	39	8	1	378	40	4.64	0	High	0	154.47	11
FALSE	Master Protein	AT5G55530.1	Calcium-dependent lipid-binding (CaLB domain) family protein	29.1358	10	37	9	1	405	44.1	4.86	1	High	0	154.23	10
FALSE	Master Protein	AT5G39830.1	Trypsin family protein with PDZ domain	35.9375	14	45	14	1	448	47.5	8.35	0	High	0	154.1	14
FALSE	Master Protein	AT4G26870.1	Class II aminoacyl-tRNA and biotin synthetases superfamily protein	34.5865	18	40	12	1	532	60.3	6.62	0	High	0	154.09	18
FALSE	Master Protein	AT5G39410.1	Saccharopine dehydrogenase	44.0529	14	36	14	1	454	49.7	8.29	0	High	0	154.04	14
FALSE	Master Protein	AT1G73990.1	signal peptide peptidase	31.9055	20	41	20	1	677	75	9.14	0	High	0	154.02	20
FALSE	Master Protein	AT2G42740.1	ribosomal protein large subunit 16A	32.967	6	45	6	1	182	20.8	9.92	0	High	0	154	6
FALSE	Master Protein	AT5G37720.1	ALWAYS EARLY 4	40.625	10	40	9	1	288	30.4	11.59	1	High	0	153.94	10
FALSE	Master Protein	AT5G27120.1	NOP56-like pre RNA processing ribonucleoprotein	36.3977	17	38	15	1	533	58.7	9.28	0	High	0	153.94	17
FALSE	Master Protein	AT1G15730.1	Cobalamin biosynthesis CobW-like protein	29.9107	11	38	9	1	448	50.2	5.5	0	High	0	153.81	11
FALSE	Master Protein	AT2G19900.1	NADP-malic enzyme 1	32.8744	16	40	12	1	581	64.2	6.76	0	High	0	153.79	16
FALSE	Master Protein	AT2G31750.1	UDP-glucosyl transferase 74D1	33.7719	14	40	13	1	456	51	5.38	0	High	0	153.55	14
FALSE	Master Protein	AT2G27030.3	calmodulin 5	40.884	11	40	11	1	181	20.6	4.82	0	High	0	153.51	11
FALSE	Master Protein	AT4G05530.1	indole-3-butyric acid response 1	52.3622	11	40	11	1	254	26.7	8.38	0	High	0	153.49	11
FALSE	Master Protein	AT2G07050.1	cycloartenol synthase 1	37.6812	24	43	24	1	759	86	6.09	0	High	0	153.39	24
FALSE	Master Protein	AT2G20140.1	AAA-type ATPase family protein	44.921	18	43	4	1	443	49.3	6.1	14	High	0	153.38	18
FALSE	Master Protein	AT3G05970.1	long-chain acyl-CoA synthetase 6	31.669	19	44	18	1	701	76.6	7.93	1	High	0	153.35	19
FALSE	Master Protein	AT1G60420.1	DC1 domain-containing protein	40.3114	20	40	20	1	578	65.1	5.01	0	High	0	153.3	20
FALSE	Master Protein	AT3G05910.1	Pectinacetylesterase family protein	44.0964	15	39	15	1	415	46.3	8.07	0	High	0	153.22	15
FALSE	Master Protein	AT1G10840.1	translation initiation factor 3 subunit H1	44.8071	14	40	14	1	337	38.3	4.92	0	High	0	153.17	14
FALSE	Master Protein	AT2G35780.1	serine carboxypeptidase-like 26	32.5221	12	38	12	1	452	51.5	6.92	0	High	0	153.16	12
FALSE	Master Protein	AT4G26010.1	Peroxidase superfamily protein	47.4194	15	45	14	1	310	33.8	9.94	1	High	0	153.14	15
FALSE	Master Protein	AT1G20110.1	RING/FYVE/PHD zinc finger superfamily protein	33.1115	19	42	19	1	601	65.4	6.79	0	High	0	153.1	19
FALSE	Master Protein	AT5G08450.3	FUNCTIONS IN: molecular_function unknown; INVOLVED IN: biological_process unknown; LOCATED IN: cellular_component unknown; EXPRESSED IN: 25 plant structures; EXPRESSED DURING: 15 growth stages; CONTAINS InterPro DOMAIN/s: Histone deacetylation protein Rxt3 (InterPro:IPR013951); Has 34444 Blast hits to 20801 proteins in 1175 species: Archae - 64; Bacteria - 2390; Metazoa - 15568; Fungi - 3729; Pla…	30.1743	28	44	28	1	918	104.1	7.46	0	High	0	153.07	28
FALSE	Master Protein	AT3G58990.1	isopropylmalate isomerase 1	58.1028	10	35	8	1	253	27.2	6.87	0	High	0	153.05	10
FALSE	Master Protein	AT1G15280.2	CASC3/Barentsz eIF4AIII binding	32.1368	18	40	17	1	585	63.4	6.57	1	High	0	152.89	18
FALSE	Master Protein	AT4G17890.1	ARF-GAP domain 8	42.8571	14	40	11	1	413	44.4	8.65	0	High	0	152.87	14
FALSE	Master Protein	AT2G01720.1	Ribophorin I	34.2672	18	41	18	1	464	52.2	8.34	0	High	0	152.84	18
FALSE	Master Protein	AT3G15360.1	thioredoxin M-type 4	21.7617	5	43	5	1	193	21.2	9.57	0	High	0	152.77	5
FALSE	Master Protein	AT2G44120.2	Ribosomal protein L30/L7 family protein	45.749	14	43	6	1	247	28.5	9.88	3	High	0	152.72	14
FALSE	Master Protein	AT2G25670.2	BEST Arabidopsis thaliana protein match is: copper ion binding (TAIR:AT4G32610.1); Has 43784 Blast hits to 26928 proteins in 1799 species: Archae - 86; Bacteria - 6347; Metazoa - 15971; Fungi - 5398; Plants - 1931; Viruses - 259; Other Eukaryotes - 13792 (source: NCBI BLink).	45.283	13	37	13	1	318	35.1	5.2	0	High	0	152.68	13
FALSE	Master Protein	AT1G17720.1	Protein phosphatase 2A, regulatory subunit PR55	42.7146	18	41	1	1	501	56.2	5.82	0	High	0	152.6	18
FALSE	Master Protein	AT5G57290.1	60S acidic ribosomal protein family	22.5	3	33	3	1	120	11.9	4.51	0	High	0	152.58	3
FALSE	Master Protein	AT1G60070.2	Adaptor protein complex AP-1, gamma subunit	28.7305	22	44	19	1	898	98.8	6.43	3	High	0	152.48	22
FALSE	Master Protein	AT1G58270.1	TRAF-like family protein	26.7677	11	43	11	1	396	45	5.82	0	High	0	152.35	11
FALSE	Master Protein	AT1G49660.1	carboxyesterase 5	46.7085	11	41	8	1	319	35.2	5.54	0	High	0	152.26	11
FALSE	Master Protein	AT2G35500.1	shikimate kinase like 2	36.1757	12	40	12	1	387	42.7	6.28	0	High	0	152.21	12
FALSE	Master Protein	AT3G61430.2	plasma membrane intrinsic protein 1A	17.8322	5	37	1	1	286	30.7	9.01	0	High	0	152.19	5
FALSE	Master Protein	AT3G60880.2	dihydrodipicolinate synthase 1	33.9726	15	45	10	1	365	40.6	7.14	5	High	0	152.17	15
FALSE	Master Protein	AT3G47370.1	Ribosomal protein S10p/S20e family protein	45.082	8	43	1	1	122	13.7	9.72	0	High	0	151.93	8
FALSE	Master Protein	AT5G54270.1	light-harvesting chlorophyll B-binding protein 3	16.6038	5	40	5	1	265	28.7	5.12	0	High	0	151.87	5
FALSE	Master Protein	AT5G39590.1	TLD-domain containing nucleolar protein	35.6089	16	40	16	1	542	59.9	5.57	0	High	0	151.83	16
FALSE	Master Protein	AT1G47900.1	Plant protein of unknown function (DUF869)	32.9222	31	43	28	1	1054	118.5	4.98	3	High	0	151.75	31
FALSE	Master Protein	AT1G43890.3	RAB GTPASE HOMOLOG B18	55.1887	11	39	9	1	212	23.5	5.81	1	High	0	151.72	11
FALSE	Master Protein	AT1G19570.1	dehydroascorbate reductase	65.7277	10	40	10	1	213	23.6	5.91	0	High	0	151.55	10
FALSE	Master Protein	AT3G04610.1	RNA-binding KH domain-containing protein	26.1698	13	39	13	1	577	63.4	4.68	0	High	0	151.38	13
FALSE	Master Protein	AT2G46750.1	D-arabinono-1,4-lactone oxidase family protein	34.1794	16	40	12	1	591	64.9	8.1	4	High	0	151.36	16
FALSE	Master Protein	AT3G62150.1	P-glycoprotein 21	24.1512	26	42	14	1	1296	140.2	6.84	2	High	0	151.28	26
FALSE	Master Protein	AT5G20490.1	Myosin family protein with Dil domain	18.3172	26	42	20	1	1545	174.9	8.25	6	High	0	151.25	26
FALSE	Master Protein	AT1G01300.1	Eukaryotic aspartyl protease family protein	39.5876	14	42	13	1	485	52.1	8.98	1	High	0	151.24	14
FALSE	Master Protein	AT5G43960.1	Nuclear transport factor 2 (NTF2) family protein with RNA binding (RRM-RBD-RNP motifs) domain	28.4444	11	38	11	1	450	50.1	5.01	0	High	0	151.22	11
FALSE	Master Protein	AT1G47710.1	Serine protease inhibitor (SERPIN) family protein	51.1509	14	37	14	1	391	42.6	5.08	0	High	0	151.08	14
FALSE	Master Protein	AT5G08740.1	NAD(P)H dehydrogenase C1	35.4528	14	38	14	1	519	57	6.96	0	High	0	150.97	14
FALSE	Master Protein	AT3G09300.1	OSBP(oxysterol binding protein)-related protein 3B	41.2664	14	43	8	1	458	51.9	5.19	6	High	0	150.86	14
FALSE	Master Protein	AT3G25770.1	allene oxide cyclase 2	33.9921	7	40	5	1	253	27.6	7.43	0	High	0	150.8	7
FALSE	Master Protein	AT5G42100.1	beta-1,3-glucanase_putative	25.4118	8	34	8	1	425	45.3	7.43	0	High	0	150.71	8
FALSE	Master Protein	AT1G77490.1	thylakoidal ascorbate peroxidase	38.0282	15	39	11	1	426	46.1	7.28	0	High	0	150.61	15
FALSE	Master Protein	AT4G00100.1	ribosomal protein S13A	65.5629	11	44	1	1	151	17.1	10.39	0	High	0	150.39	11
FALSE	Master Protein	ATCG00780.1	ribosomal protein L14	58.1967	6	36	6	1	122	13.6	9.29	0	High	0	150.02	6
FALSE	Master Protein	AT3G62940.3	Cysteine proteinases superfamily protein	45.4819	14	40	14	1	332	37.3	7.34	0	High	0	149.88	14
FALSE	Master Protein	AT1G17880.1	basic transcription factor 3	72.1212	8	36	5	1	165	17.9	7.25	3	High	0	149.87	8
FALSE	Master Protein	AT3G54440.3	glycoside hydrolase family 2 protein	23.4821	24	43	24	1	1120	126.7	5.77	0	High	0	149.76	24
FALSE	Master Protein	AT3G20320.1	trigalactosyldiacylglycerol2	44.357	15	34	15	1	381	41.6	8.69	0	High	0	149.64	15
FALSE	Master Protein	AT2G47730.1	glutathione S-transferase phi 8	53.9924	12	39	11	1	263	29.2	8.5	0	High	0	149.61	12
FALSE	Master Protein	AT5G16510.2	Alpha-1,4-glucan-protein synthase family protein	59.1954	17	40	16	1	348	38.6	5.21	0	High	0	149.49	17
FALSE	Master Protein	AT5G38830.1	Cysteinyl-tRNA synthetase, class Ia family protein	37.182	17	42	16	1	511	57.8	6.33	1	High	0	149.15	17
FALSE	Master Protein	AT5G14200.1	isopropylmalate dehydrogenase 1	43.5208	13	39	6	1	409	44.1	6.01	0	High	0	148.91	13
FALSE	Master Protein	AT1G09010.1	glycoside hydrolase family 2 protein	29.9788	21	37	21	1	944	107.6	6.46	0	High	0	148.67	21
FALSE	Master Protein	ATCG00130.1	ATPase, F0 complex, subunit B/B', bacterial/chloroplast	43.4783	11	43	11	1	184	21	8.13	0	High	0	148.63	11
FALSE	Master Protein	AT1G25490.1	ARM repeat superfamily protein	27.551	14	39	10	1	588	65.5	5.07	1	High	0	148.62	14
FALSE	Master Protein	AT5G39740.2	ribosomal protein L5 B	54.8173	18	43	4	1	301	34.4	9.17	15	High	0	148.58	18
FALSE	Master Protein	AT4G01370.1	MAP kinase 4	40.6915	14	37	8	1	376	42.8	6.11	6	High	0	148.53	14
FALSE	Master Protein	AT3G14220.1	GDSL-like Lipase/Acylhydrolase superfamily protein	53.719	16	37	15	1	363	40.2	6.84	0	High	0	148.49	16
FALSE	Master Protein	AT1G14380.1	IQ-domain 28	34.6386	19	38	18	1	664	72.8	9.32	2	High	0	148.49	19
FALSE	Master Protein	AT5G13640.1	phospholipid:diacylglycerol acyltransferase	29.8063	15	40	15	1	671	74.1	6.96	0	High	0	148.41	15
FALSE	Master Protein	AT4G04460.1	Saposin-like aspartyl protease family protein	24.2126	9	35	9	1	508	55.5	7.14	0	High	0	148.37	9
FALSE	Master Protein	AT5G44380.1	FAD-binding Berberine family protein	33.8262	18	43	17	1	541	60.6	9.48	1	High	0	148.08	18
FALSE	Master Protein	AT3G15670.1	Late embryogenesis abundant protein (LEA) family protein	66.6667	14	36	14	1	225	24.2	8.85	0	High	0	148.06	14
FALSE	Master Protein	AT2G31570.1	glutathione peroxidase 2	73.3728	13	44	10	1	169	18.9	5.72	3	High	0	148.05	13
FALSE	Master Protein	AT5G15180.1	Peroxidase superfamily protein	50.4559	14	39	12	1	329	36.2	8.41	0	High	0	148.05	14
FALSE	Master Protein	AT2G26250.1	3-ketoacyl-CoA synthase 10	29.2727	13	37	13	1	550	61.9	9.01	0	High	0	148.04	13
FALSE	Master Protein	AT4G28440.1	Nucleic acid-binding, OB-fold-like protein	65.3595	8	41	7	1	153	16.4	9.41	0	High	0	148.03	8
FALSE	Master Protein	AT3G06980.1	DEA(D/H)-box RNA helicase family protein	31.7542	19	36	19	1	781	87.4	7.64	0	High	0	148.02	19
FALSE	Master Protein	AT4G25130.1	peptide met sulfoxide reductase 4	33.7209	7	38	5	1	258	28.6	8.75	0	High	0	147.99	7
FALSE	Master Protein	AT2G21160.1	Translocon-associated protein (TRAP), alpha subunit	16.2791	3	34	3	1	258	28.2	5.21	0	High	0	147.93	3
FALSE	Master Protein	AT3G49470.1	nascent polypeptide-associated complex subunit alpha-like protein 2	61.2903	7	34	7	1	217	23.7	4.49	0	High	0	147.91	7
FALSE	Master Protein	AT5G50250.1	chloroplast RNA-binding protein 31B	26.2976	6	33	6	1	289	31.9	4.96	0	High	0	147.9	6
FALSE	Master Protein	AT3G07320.1	O-Glycosyl hydrolases family 17 protein	27.3913	10	39	10	1	460	50.6	8.6	0	High	0	147.87	10
FALSE	Master Protein	AT5G53490.3	Tetratricopeptide repeat (TPR)-like superfamily protein	39.6	9	42	9	1	250	27.2	6.95	0	High	0	147.86	9
FALSE	Master Protein	AT5G58270.1	ABC transporter of the mitochondrion 3	28.9835	18	42	18	1	728	80.4	9.23	0	High	0	147.76	18
FALSE	Master Protein	AT4G34260.1	1,2-alpha-L-fucosidases	24.3179	17	41	17	1	843	93.7	7.24	0	High	0	147.69	17
FALSE	Master Protein	AT3G61240.2	DEA(D/H)-box RNA helicase family protein	37.1486	13	35	6	1	498	56.7	8.4	0	High	0	147.52	13
FALSE	Master Protein	AT4G30610.1	alpha/beta-Hydrolases superfamily protein	34.4086	12	40	12	1	465	52.8	9.13	0	High	0	147.46	12
FALSE	Master Protein	AT5G13410.1	FKBP-like peptidyl-prolyl cis-trans isomerase family protein	26.1719	8	38	8	1	256	27.8	7.69	0	High	0	147.46	8
FALSE	Master Protein	AT5G36170.1	high chlorophyll fluorescent 109	37.5	16	38	16	1	456	50.9	5.45	0	High	0	147.36	16
FALSE	Master Protein	AT1G49430.1	long-chain acyl-CoA synthetase 2	21.6541	15	39	14	1	665	74.3	6.14	0	High	0	147.33	15
FALSE	Master Protein	AT4G30810.1	serine carboxypeptidase-like 29	20.2505	9	41	9	1	479	53	6.32	0	High	0	147.31	9
FALSE	Master Protein	AT4G20130.1	plastid transcriptionally active 14	30.2277	13	40	13	1	483	55.6	5.6	0	High	0	147.28	13
FALSE	Master Protein	AT3G27570.1	Sucrase/ferredoxin-like family protein	35.6201	11	37	10	1	379	41.6	5.74	1	High	0	146.97	11
FALSE	Master Protein	AT3G17520.1	Late embryogenesis abundant protein (LEA) family protein	52.349	19	42	19	1	298	32.5	5.38	0	High	0	146.95	19
FALSE	Master Protein	AT5G35180.1	Protein of unknown function (DUF1336)	30.3342	21	40	21	1	778	87	7.33	0	High	0	146.94	21
FALSE	Master Protein	AT5G07120.1	sorting nexin 2B	44.2308	22	43	16	1	572	64.2	5.57	0	High	0	146.9	22
FALSE	Master Protein	AT1G72810.1	Pyridoxal-5'-phosphate-dependent enzyme family protein	36.0465	16	37	14	1	516	56.9	8.05	0	High	0	146.68	16
FALSE	Master Protein	AT1G79850.1	ribosomal protein S17	46.9799	9	43	9	1	149	16.3	10.56	0	High	0	146.68	9
FALSE	Master Protein	AT1G12080.2	Vacuolar calcium-binding protein-related	78.2609	9	29	8	1	138	15.4	4.04	1	High	0	146.66	9
FALSE	Master Protein	AT2G26730.1	Leucine-rich repeat protein kinase family protein	31.9149	17	40	15	1	658	71.7	7.55	1	High	0	146.57	17
FALSE	Master Protein	AT5G22480.1	ZPR1 zinc-finger domain protein	38.1339	13	35	7	1	493	54	4.72	6	High	0	146.52	13
FALSE	Master Protein	AT5G27030.2	TOPLESS-related 3	23.4568	23	43	14	1	1134	125.5	7.3	1	High	0	146.48	23
FALSE	Master Protein	AT4G08310.1	FUNCTIONS IN: molecular_function unknown; INVOLVED IN: biological_process unknown; LOCATED IN: cellular_component unknown; EXPRESSED IN: 25 plant structures; EXPRESSED DURING: 13 growth stages; CONTAINS InterPro DOMAIN/s: Histone chaperone domain CHZ (InterPro:IPR019098); BEST Arabidopsis thaliana protein match is: unknown protein (TAIR:AT1G44780.2); Has 53711 Blast hits to 33687 proteins in 1618…	46.4286	23	42	23	1	504	56.2	4.96	0	High	0	146.33	23
FALSE	Master Protein	AT4G29040.1	regulatory particle AAA-ATPase 2A	44.6953	17	41	3	1	443	49.3	6.21	0	High	0	146.33	17
FALSE	Master Protein	AT1G09310.1	Protein of unknown function, DUF538	53.6313	9	40	8	1	179	19.9	5.38	1	High	0	146.27	9
FALSE	Master Protein	AT5G16130.1	Ribosomal protein S7e family protein	62.6316	11	36	9	1	190	22	9.74	2	High	0	146.23	11
FALSE	Master Protein	AT1G11660.1	heat shock protein 70 (Hsp 70) family protein	31.979	22	40	22	1	763	85.2	5.71	0	High	0	146.17	22
FALSE	Master Protein	AT5G57030.1	Lycopene beta/epsilon cyclase protein	43.7023	20	40	20	1	524	58.5	5.92	0	High	0	146.04	20
FALSE	Master Protein	AT4G10450.1	Ribosomal protein L6 family	57.732	11	42	5	1	194	22	9.5	0	High	0	145.83	11
FALSE	Master Protein	AT3G55260.1	beta-hexosaminidase 1	28.6506	14	36	13	1	541	61.2	6.27	0	High	0	145.82	14
FALSE	Master Protein	AT2G30860.1	glutathione S-transferase PHI 9	35.3488	6	37	5	1	215	24.1	6.65	0	High	0	145.65	6
FALSE	Master Protein	AT4G05180.1	photosystem II subunit Q-2	46.087	10	39	8	1	230	24.6	9.72	0	High	0	145.63	10
FALSE	Master Protein	AT1G07750.1	RmlC-like cupins superfamily protein	39.0449	12	37	12	1	356	38.3	6.18	0	High	0	145.58	12
FALSE	Master Protein	AT5G63620.1	GroES-like zinc-binding alcohol dehydrogenase family protein	42.623	13	34	13	1	427	45.5	7.65	0	High	0	145.56	13
FALSE	Master Protein	AT3G63540.1	Mog1/PsbP/DUF1795-like photosystem II reaction center PsbP family protein	54.5455	8	33	8	1	143	16.3	5.87	0	High	0	145.43	8
FALSE	Master Protein	AT1G36310.2	S-adenosyl-L-methionine-dependent methyltransferases superfamily protein	48.0198	16	39	16	1	404	44.9	5.66	0	High	0	145.4	16
FALSE	Master Protein	AT1G71860.3	protein tyrosine phosphatase 1	55.5882	14	39	14	1	340	37.8	6.29	0	High	0	145.38	14
FALSE	Master Protein	AT1G20200.1	PAM domain (PCI/PINT associated module) protein	52.459	23	42	11	1	488	55.5	8.19	12	High	0	145.36	23
FALSE	Master Protein	AT4G34890.1	xanthine dehydrogenase 1	15.7972	21	44	20	1	1361	149.1	6.65	1	High	0	145.08	21
FALSE	Master Protein	AT4G10060.1	Beta-glucosidase, GBA2 type family protein	28.6334	20	38	19	1	922	104.3	6.23	1	High	0	145.05	20
FALSE	Master Protein	AT2G34310.3	unknown protein; FUNCTIONS IN: molecular_function unknown; INVOLVED IN: biological_process unknown; LOCATED IN: cellular_component unknown; EXPRESSED IN: 24 plant structures; EXPRESSED DURING: 13 growth stages; BEST Arabidopsis thaliana protein match is: unknown protein (TAIR:AT1G29530.1); Has 236 Blast hits to 216 proteins in 70 species: Archae - 0; Bacteria - 10; Metazoa - 74; Fungi - 47; Plant…	58.2645	12	35	12	1	242	26.1	5.05	0	High	0	145	12
FALSE	Master Protein	AT5G65770.2	little nuclei4	26.0077	28	44	28	1	1042	121.1	5.34	0	High	0	144.95	28
FALSE	Master Protein	AT2G04400.1	Aldolase-type TIM barrel family protein	48.2587	18	38	18	1	402	44.5	7.39	0	High	0	144.87	18
FALSE	Master Protein	AT3G01780.1	ARM repeat superfamily protein	25.4252	25	38	25	1	1176	130.8	5.96	0	High	0	144.78	25
FALSE	Master Protein	AT1G21600.2	plastid transcriptionally active 6	62.8049	18	42	18	1	328	37.4	5.02	0	High	0	144.65	18
FALSE	Master Protein	AT2G29690.1	anthranilate synthase 2	35.4267	18	37	16	1	621	69.8	6.71	0	High	0	144.55	18
FALSE	Master Protein	AT4G00430.1	plasma membrane intrinsic protein 1;4	26.8293	6	31	4	1	287	30.7	8.84	0	High	0	144.28	6
FALSE	Master Protein	AT1G14410.1	ssDNA-binding transcriptional regulator	46.0076	9	36	7	1	263	29	9.38	0	High	0	144.2	9
FALSE	Master Protein	AT3G51160.1	NAD(P)-binding Rossmann-fold superfamily protein	47.185	15	41	9	1	373	41.9	6.11	7	High	0	144.1	15
FALSE	Master Protein	AT1G24280.1	glucose-6-phosphate dehydrogenase 3	34.3907	19	43	6	1	599	67.3	7.18	0	High	0	144.02	19
FALSE	Master Protein	AT5G03290.1	isocitrate dehydrogenase V	41.7112	14	34	7	1	374	40.6	6.79	7	High	0	143.82	14
FALSE	Master Protein	AT4G25900.1	Galactose mutarotase-like superfamily protein	42.7673	12	38	12	1	318	36.2	9.66	0	High	0	143.8	12
FALSE	Master Protein	AT4G15545.1	unknown protein; BEST Arabidopsis thaliana protein match is: unknown protein (TAIR:AT1G16520.1); Has 30201 Blast hits to 17322 proteins in 780 species: Archae - 12; Bacteria - 1396; Metazoa - 17338; Fungi - 3422; Plants - 5037; Viruses - 0; Other Eukaryotes - 2996 (source: NCBI BLink).	46.5875	13	41	13	1	337	37.2	5.01	0	High	0	143.66	13
FALSE	Master Protein	AT5G10240.1	asparagine synthetase 3	28.3737	14	37	7	1	578	65.2	6.57	0	High	0	143.65	14
FALSE	Master Protein	AT5G48960.1	HAD-superfamily hydrolase, subfamily IG, 5'-nucleotidase	35.3583	16	35	16	1	642	72.8	6.4	0	High	0	143.63	16
FALSE	Master Protein	AT1G54030.1	GDSL-like Lipase/Acylhydrolase superfamily protein	27.3381	9	39	9	1	417	46.1	6.73	0	High	0	143.63	9
FALSE	Master Protein	AT1G02890.1	AAA-type ATPase family protein	23.435	24	38	12	1	1246	135.9	5.97	0	High	0	143.6	24
FALSE	Master Protein	AT3G25800.1	protein phosphatase 2A subunit A2	34.2419	14	34	7	1	587	65.6	5.14	0	High	0	143.43	14
FALSE	Master Protein	AT4G25210.1	DNA-binding storekeeper protein-related transcriptional regulator	48.3696	20	42	20	1	368	40.3	6.29	0	High	0	143.4	20
FALSE	Master Protein	AT5G09620.1	Octicosapeptide/Phox/Bem1p family protein	33.71	15	38	14	1	531	59.6	5.38	1	High	0	143.3	15
FALSE	Master Protein	AT5G44020.1	HAD superfamily, subfamily IIIB acid phosphatase	43.75	11	42	11	1	272	31	7.91	0	High	0	143.18	11
FALSE	Master Protein	AT1G02560.1	nuclear encoded CLP protease 5	18.7919	5	35	5	1	298	32.3	8.24	0	High	0	143.11	5
FALSE	Master Protein	AT3G60340.1	alpha/beta-Hydrolases superfamily protein	36.6864	10	40	10	1	338	37.1	5.34	0	High	0	143.05	10
FALSE	Master Protein	AT3G06480.1	DEAD box RNA helicase family protein	21.1397	20	40	13	1	1088	119.5	9.94	6	High	0	143.03	20
FALSE	Master Protein	AT5G23820.1	MD-2-related lipid recognition domain-containing protein	23.7805	5	43	5	1	164	17.9	4.68	0	High	0	143.03	5
FALSE	Master Protein	AT5G53560.1	cytochrome B5 isoform E	67.1642	8	35	8	1	134	15.1	5.33	0	High	0	143.02	8
FALSE	Master Protein	AT1G08110.4	lactoylglutathione lyase family protein / glyoxalase I family protein	55.7447	12	38	12	1	235	26.5	6.92	0	High	0	142.99	12
FALSE	Master Protein	AT2G47240.1	AMP-dependent synthetase and ligase family protein	34.697	18	37	18	1	660	74.6	6.35	0	High	0	142.95	18
FALSE	Master Protein	AT1G07990.1	SIT4 phosphatase-associated family protein	34.2893	20	34	19	1	802	89.5	4.6	0	High	0	142.75	20
FALSE	Master Protein	AT1G06530.1	Tropomyosin-related	45.2012	16	40	16	1	323	36.1	4.81	0	High	0	142.75	16
FALSE	Master Protein	AT5G64460.1	Phosphoglycerate mutase family protein	40.4255	9	34	9	1	282	31.6	6.34	0	High	0	142.7	9
FALSE	Master Protein	AT3G15356.1	Legume lectin family protein	37.6384	9	39	6	1	271	29.7	8.87	3	High	0	142.34	9
FALSE	Master Protein	AT5G64260.1	EXORDIUM like 2	34.0984	10	38	8	1	305	32.7	9.38	2	High	0	142.34	10
FALSE	Master Protein	AT5G44310.2	Late embryogenesis abundant protein (LEA) family protein	48.9426	24	45	24	1	331	37.1	8.65	0	High	0	142.3	24
FALSE	Master Protein	AT5G25100.2	Endomembrane protein 70 protein family	19.8157	12	38	7	1	651	74.8	8.13	5	High	0	142.29	12
FALSE	Master Protein	AT3G15000.1	cobalt ion binding	25.3165	9	38	9	1	395	42.8	9.33	0	High	0	142.25	9
FALSE	Master Protein	AT4G14800.1	20S proteasome beta subunit D2	54.2714	9	38	5	1	199	22	6.68	0	High	0	142.14	9
FALSE	Master Protein	AT5G65110.1	acyl-CoA oxidase 2	35.2601	22	42	22	1	692	77.4	8.29	0	High	0	142.04	22
FALSE	Master Protein	AT1G13930.2	Involved in response to salt stress. Knockout mutants are hypersensitive to salt stress.	63.871	8	32	8	1	155	16.2	4.92	0	High	0	141.98	8
FALSE	Master Protein	AT5G13520.1	peptidase M1 family protein	30.3571	17	38	17	1	616	69.2	5.24	0	High	0	141.97	17
FALSE	Master Protein	AT3G42050.1	vacuolar ATP synthase subunit H family protein	38.5488	13	34	13	1	441	50.3	7.03	0	High	0	141.94	13
FALSE	Master Protein	AT4G11010.1	nucleoside diphosphate kinase 3	29.4118	8	43	3	1	238	25.7	9.23	5	High	0	141.8	8
FALSE	Master Protein	AT1G07360.1	CCCH-type zinc fingerfamily protein with RNA-binding domain	32.4324	16	41	10	1	481	53.6	7.47	6	High	0	141.75	16
FALSE	Master Protein	AT1G74910.1	ADP-glucose pyrophosphorylase family protein	30.8434	10	36	9	1	415	45.5	7.21	1	High	0	141.57	10
FALSE	Master Protein	AT1G75690.1	DnaJ/Hsp40 cysteine-rich domain superfamily protein	39.6104	4	25	4	1	154	16.3	7.08	0	High	0	141.46	4
FALSE	Master Protein	AT4G34660.1	SH3 domain-containing protein	39.9457	13	34	13	1	368	40.9	6.9	0	High	0	141.44	13
FALSE	Master Protein	AT1G09750.1	Eukaryotic aspartyl protease family protein	27.8396	10	37	10	1	449	47.6	7.52	0	High	0	141.25	10
FALSE	Master Protein	AT4G21210.1	PPDK regulatory protein	41.6873	15	38	11	1	403	43.7	7.4	4	High	0	141.05	15
FALSE	Master Protein	ATCG00860.1	Chloroplast Ycf2;ATPase, AAA type, core	14.5597	31	42	31	1	2294	269.4	8.69	0	High	0	141.04	31
FALSE	Master Protein	AT1G21880.2	lysm domain GPI-anchored protein 1 precursor	24.7596	7	31	6	1	416	43.5	5.07	0	High	0	141.01	7
FALSE	Master Protein	AT1G20810.1	FKBP-like peptidyl-prolyl cis-trans isomerase family protein	30.6034	7	34	7	1	232	25.5	9.32	0	High	0	140.97	7
FALSE	Master Protein	AT5G13510.1	Ribosomal protein L10 family protein	44.0909	9	37	8	1	220	24.7	9.32	0	High	0	140.82	9
FALSE	Master Protein	AT3G55460.1	SC35-like splicing factor 30	50	15	50	15	1	262	29.6	11.27	0	High	0	140.73	15
FALSE	Master Protein	AT1G22920.1	COP9 signalosome 5A	51.2605	15	36	12	1	357	39.7	5.27	3	High	0	140.69	15
FALSE	Master Protein	AT1G31800.1	cytochrome P450, family 97, subfamily A, polypeptide 3	36.9748	19	36	19	1	595	66.8	6.13	0	High	0	140.68	19
FALSE	Master Protein	AT4G39730.1	Lipase/lipooxygenase, PLAT/LH2 family protein	30.3867	6	40	5	1	181	20.1	5.19	1	High	0	140.55	6
FALSE	Master Protein	AT3G59990.4	methionine aminopeptidase 2B	34.1686	14	35	8	1	439	49	5.69	7	High	0	140.52	14
FALSE	Master Protein	AT3G02720.1	Class I glutamine amidotransferase-like superfamily protein	34.0206	10	29	10	1	388	41.6	5.41	0	High	0	140.44	10
FALSE	Master Protein	AT4G33400.1	Vacuolar import/degradation, Vid27-related protein	35.6589	17	34	16	1	645	71.6	5.34	1	High	0	140.3	17
FALSE	Master Protein	AT1G05350.1	NAD(P)-binding Rossmann-fold superfamily protein	39.2111	13	37	13	1	431	47	4.69	0	High	0	140.24	13
FALSE	Master Protein	AT2G20050.1	protein serine/threonine phosphatases;protein kinases;catalytics;cAMP-dependent protein kinase regulators;ATP binding;protein serine/threonine phosphatases	22.3035	23	40	23	1	1094	121.3	5.19	0	High	0	140.2	23
FALSE	Master Protein	AT2G20280.1	Zinc finger C-x8-C-x5-C-x3-H type family protein	43.3962	19	43	19	1	371	42.4	5.05	0	High	0	140.15	19
FALSE	Master Protein	AT5G37360.1	unknown protein; FUNCTIONS IN: molecular_function unknown; INVOLVED IN: biological_process unknown; LOCATED IN: chloroplast thylakoid membrane, chloroplast; EXPRESSED IN: 23 plant structures; EXPRESSED DURING: 13 growth stages; Has 1807 Blast hits to 1807 proteins in 277 species: Archae - 0; Bacteria - 0; Metazoa - 736; Fungi - 347; Plants - 385; Viruses - 0; Other Eukaryotes - 339 (source: NCBI …	32.6861	10	38	10	1	309	33.4	7.84	0	High	0	140.08	10
FALSE	Master Protein	AT3G48700.1	carboxyesterase 13	49.848	14	38	13	1	329	36.1	5.63	2	High	0	140.07	14
FALSE	Master Protein	AT5G10170.1	myo-inositol-1-phosphate synthase 3	36.0784	16	37	6	1	510	56.4	5.86	10	High	0	140.07	16
FALSE	Master Protein	AT1G61730.1	DNA-binding storekeeper protein-related transcriptional regulator	43.883	15	36	15	1	376	40.9	5.55	0	High	0	140.07	15
FALSE	Master Protein	AT4G01100.2	adenine nucleotide transporter 1	46.7213	14	36	14	1	366	40	9.52	0	High	0	139.79	14
FALSE	Master Protein	AT3G61820.1	Eukaryotic aspartyl protease family protein	33.9545	13	37	12	1	483	51.4	8.43	0	High	0	139.75	13
FALSE	Master Protein	AT2G21370.1	xylulose kinase-1	43.3054	16	36	16	1	478	52.4	6.8	0	High	0	139.7	16
FALSE	Master Protein	AT4G13340.1	Leucine-rich repeat (LRR) family protein	23.1579	14	42	7	1	760	82.2	6.96	7	High	0	139.68	14
FALSE	Master Protein	AT2G45220.1	Plant invertase/pectin methylesterase inhibitor superfamily	32.2896	13	35	13	1	511	55.9	9.04	0	High	0	139.63	13
FALSE	Master Protein	AT1G05510.1	Protein of unknown function (DUF1264)	47.7178	12	39	12	1	241	27.3	6.71	0	High	0	139.51	12
FALSE	Master Protein	AT4G35000.1	ascorbate peroxidase 3	48.7805	15	39	15	1	287	31.6	6.95	0	High	0	139.48	15
FALSE	Master Protein	AT5G04280.1	RNA-binding (RRM/RBD/RNP motifs) family protein with retrovirus zinc finger-like domain	49.3548	16	43	16	1	310	33.5	9	0	High	0	139.46	16
FALSE	Master Protein	AT2G32080.1	purin-rich alpha 1	46.6216	12	36	12	1	296	32.2	6.13	0	High	0	139.41	12
FALSE	Master Protein	AT3G47070.1	LOCATED IN: thylakoid, chloroplast thylakoid membrane, chloroplast, chloroplast envelope; EXPRESSED IN: 22 plant structures; EXPRESSED DURING: 13 growth stages; CONTAINS InterPro DOMAIN/s: Thylakoid soluble phosphoprotein TSP9 (InterPro:IPR021584); Has 37 Blast hits to 37 proteins in 10 species: Archae - 0; Bacteria - 0; Metazoa - 0; Fungi - 0; Plants - 37; Viruses - 0; Other Eukaryotes - 0 (sour…	65	7	38	7	1	100	10.5	9.74	0	High	0	139.39	7
FALSE	Master Protein	AT5G56630.1	phosphofructokinase 7	39.3814	16	38	10	1	485	53.4	7.31	6	High	0	139.39	16
FALSE	Master Protein	AT5G10010.1	unknown protein; FUNCTIONS IN: molecular_function unknown; INVOLVED IN: biological_process unknown; LOCATED IN: nucleolus; EXPRESSED IN: 25 plant structures; EXPRESSED DURING: 15 growth stages; BEST Arabidopsis thaliana protein match is: unknown protein (TAIR:AT5G64910.1); Has 33260 Blast hits to 16857 proteins in 1270 species: Archae - 88; Bacteria - 3040; Metazoa - 11915; Fungi - 3137; Plants -…	36.1751	16	35	16	1	434	50.5	4.97	0	High	0	139.17	16
FALSE	Master Protein	AT4G27070.1	tryptophan synthase beta-subunit 2	36.2105	15	39	2	1	475	51.6	6.67	0	High	0	139.13	15
FALSE	Master Protein	AT4G24510.1	HXXXD-type acyl-transferase family protein	43.4679	15	38	15	1	421	47.2	5.6	0	High	0	139.07	15
FALSE	Master Protein	AT1G53830.1	pectin methylesterase 2	27.7683	14	34	9	1	587	64.1	8.94	0	High	0	138.99	14
FALSE	Master Protein	AT4G13550.1	triglyceride lipases;triglyceride lipases	31.4685	19	36	19	1	715	79.3	5.2	0	High	0	138.94	19
FALSE	Master Protein	AT3G22630.1	20S proteasome beta subunit D1	43.6275	9	41	4	1	204	22.5	6.39	5	High	0	138.77	9
FALSE	Master Protein	AT1G09560.1	germin-like protein 5	21.0046	6	38	3	1	219	22.9	8.44	3	High	0	138.76	6
FALSE	Master Protein	AT2G04280.1	unknown protein; FUNCTIONS IN: molecular_function unknown; INVOLVED IN: biological_process unknown; EXPRESSED IN: 24 plant structures; EXPRESSED DURING: 13 growth stages; BEST Arabidopsis thaliana protein match is: unknown protein (TAIR:AT4G12700.1); Has 130 Blast hits to 130 proteins in 16 species: Archae - 0; Bacteria - 0; Metazoa - 0; Fungi - 0; Plants - 124; Viruses - 0; Other Eukaryotes - 6 …	37.5	20	37	20	1	568	64.5	5.94	0	High	0	138.6	20
FALSE	Master Protein	AT3G23600.1	alpha/beta-Hydrolases superfamily protein	56.9038	10	38	10	1	239	25.8	5.31	0	High	0	138.47	10
FALSE	Master Protein	AT1G30530.1	UDP-glucosyl transferase 78D1	31.3466	13	36	11	1	453	50.1	5.63	2	High	0	138.33	13
FALSE	Master Protein	AT2G25280.1	CONTAINS InterPro DOMAIN/s: UPF0103/Mediator of ErbB2-driven cell motility (Memo), related (InterPro:IPR002737); Has 1074 Blast hits to 1072 proteins in 474 species: Archae - 213; Bacteria - 366; Metazoa - 159; Fungi - 135; Plants - 54; Viruses - 0; Other Eukaryotes - 147 (source: NCBI BLink).	46.7354	11	37	11	1	291	32.6	6.84	0	High	0	138.22	11
FALSE	Master Protein	AT1G35160.1	GF14 protein phi chain	56.5543	16	41	8	1	267	30.2	4.87	9	High	0	138.19	16
FALSE	Master Protein	AT4G21710.1	DNA-directed RNA polymerase family protein	18.9394	19	38	19	1	1188	134.9	7.8	0	High	0	138.18	19
FALSE	Master Protein	AT4G31840.1	early nodulin-like protein 15	37.2881	7	31	7	1	177	19	8.84	0	High	0	137.98	7
FALSE	Master Protein	AT4G35250.1	NAD(P)-binding Rossmann-fold superfamily protein	37.9747	13	37	13	1	395	43.7	8.43	0	High	0	137.91	13
FALSE	Master Protein	AT1G78300.1	general regulatory factor 2	58.6873	14	40	9	1	259	29.1	4.79	0	High	0	137.75	14
FALSE	Master Protein	AT1G08490.1	chloroplastic NIFS-like cysteine desulfurase	29.5896	13	37	13	1	463	50.5	6.71	0	High	0	137.62	13
FALSE	Master Protein	AT1G28200.1	FH interacting protein 1	67.1815	15	39	15	1	259	27.9	6.64	0	High	0	137.59	15
FALSE	Master Protein	AT4G35860.1	GTP-binding 2	60.6635	11	33	6	1	211	23.2	7.01	0	High	0	137.5	11
FALSE	Master Protein	AT2G21620.1	Adenine nucleotide alpha hydrolases-like superfamily protein	75.4011	11	35	11	1	187	20.6	5.62	0	High	0	137.49	11
FALSE	Master Protein	AT3G17970.1	translocon at the outer membrane of chloroplasts 64-III	36.163	17	36	17	1	589	64	8.37	0	High	0	137.36	17
FALSE	Master Protein	AT3G07050.1	GTP-binding family protein	44.1581	24	38	24	1	582	65.7	8.54	0	High	0	137.24	24
FALSE	Master Protein	AT1G45201.1	triacylglycerol lipase-like 1	33.4029	15	39	15	1	479	54.7	8.98	0	High	0	137.15	15
FALSE	Master Protein	AT5G46110.4	Glucose-6-phosphate/phosphate translocator-related	13.253	6	37	6	1	415	45.2	9.66	0	High	0	137.07	6
FALSE	Master Protein	AT3G58730.1	vacuolar ATP synthase subunit D (VATD) / V-ATPase D subunit / vacuolar proton pump D subunit (VATPD)	58.6207	17	42	17	1	261	29	9.51	0	High	0	137.06	17
FALSE	Master Protein	AT2G05170.1	vacuolar protein sorting 11	28.0043	25	39	25	1	932	105.6	5.5	0	High	0	136.95	25
FALSE	Master Protein	AT1G13320.1	protein phosphatase 2A subunit A3	35.7751	15	34	8	1	587	65.5	5.07	8	High	0	136.91	15
FALSE	Master Protein	AT5G17790.1	zinc finger (Ran-binding) family protein	28.8918	19	35	19	1	758	85.9	8.31	0	High	0	136.91	19
FALSE	Master Protein	AT2G39770.2	Glucose-1-phosphate adenylyltransferase family protein	26.8698	8	36	8	1	361	39.6	6.73	0	High	0	136.78	8
FALSE	Master Protein	AT4G27640.1	ARM repeat superfamily protein	19.4656	17	35	17	1	1048	115.2	4.91	0	High	0	136.67	17
FALSE	Master Protein	AT2G22475.1	GRAM domain family protein	52.1739	14	37	14	1	299	32.2	5.41	0	High	0	136.54	14
FALSE	Master Protein	AT4G23940.1	FtsH extracellular protease family	25.8985	19	37	19	1	946	105.5	7.83	0	High	0	136.47	19
FALSE	Master Protein	AT5G45750.1	RAB GTPase homolog A1C	54.6296	10	37	2	1	216	23.9	5.88	3	High	0	136.46	10
FALSE	Master Protein	AT4G12130.1	Glycine cleavage T-protein family	59.2875	18	37	18	1	393	43.5	6.73	0	High	0	136.41	18
FALSE	Master Protein	AT3G10850.1	Metallo-hydrolase/oxidoreductase superfamily protein	39.9225	9	38	9	1	258	28.8	6.38	0	High	0	136.33	9
FALSE	Master Protein	AT3G62910.1	Peptide chain release factor 1	39.5735	15	37	15	1	422	47.5	7.69	0	High	0	136.21	15
FALSE	Master Protein	AT1G17260.1	autoinhibited H(+)-ATPase isoform 10	9.2925	9	37	1	1	947	104.7	6.43	0	High	0	136.17	9
FALSE	Master Protein	AT4G01150.1	unknown protein; FUNCTIONS IN: molecular_function unknown; INVOLVED IN: biological_process unknown; LOCATED IN: thylakoid, chloroplast thylakoid membrane, chloroplast, plastoglobule, chloroplast envelope; EXPRESSED IN: 23 plant structures; EXPRESSED DURING: 14 growth stages; BEST Arabidopsis thaliana protein match is: unknown protein (TAIR:AT4G38100.1); Has 323 Blast hits to 323 proteins in 59 sp…	24.3902	7	35	7	1	164	17.7	9.17	0	High	0	136.04	7
FALSE	Master Protein	AT3G07810.2	RNA-binding (RRM/RBD/RNP motifs) family protein	39.798	14	32	13	1	495	52	8.5	0	High	0	136	14
FALSE	Master Protein	AT5G63550.2	DEK domain-containing chromatin associated protein	29.7552	16	37	16	1	531	59.5	5.17	0	High	0	135.95	16
FALSE	Master Protein	AT2G36070.1	translocase inner membrane subunit 44-2	37.1002	17	34	17	1	469	53.6	8.76	0	High	0	135.81	17
FALSE	Master Protein	AT3G52840.1	beta-galactosidase 2	23.1087	14	40	8	1	727	82	8.4	1	High	0	135.76	14
FALSE	Master Protein	AT5G47870.1	FUNCTIONS IN: molecular_function unknown; INVOLVED IN: biological_process unknown; LOCATED IN: chloroplast; EXPRESSED IN: 22 plant structures; EXPRESSED DURING: 13 growth stages; BEST Arabidopsis thaliana protein match is: cobalt ion binding (TAIR:AT1G71310.1); Has 1807 Blast hits to 1807 proteins in 277 species: Archae - 0; Bacteria - 0; Metazoa - 736; Fungi - 347; Plants - 385; Viruses - 0; Oth…	54.7739	8	34	8	1	199	21.4	8.18	0	High	0	135.75	8
FALSE	Master Protein	AT5G14540.1	Protein of unknown function (DUF1421)	32.1755	14	38	14	1	547	59.1	6.37	0	High	0	135.67	14
FALSE	Master Protein	AT1G13280.1	allene oxide cyclase 4	36.6142	8	35	6	1	254	27.8	9.07	0	High	0	135.63	8
FALSE	Master Protein	AT4G29680.1	Alkaline-phosphatase-like family protein	32.6613	13	37	13	1	496	54.6	5.88	0	High	0	135.62	13
FALSE	Master Protein	AT5G22640.1	MORN (Membrane Occupation and Recognition Nexus) repeat-containing protein	19.8622	15	38	15	1	871	99.9	4.48	0	High	0	135.46	15
FALSE	Master Protein	AT5G57120.1	FUNCTIONS IN: molecular_function unknown; INVOLVED IN: biological_process unknown; LOCATED IN: nucleolus; EXPRESSED IN: 21 plant structures; EXPRESSED DURING: 13 growth stages; CONTAINS InterPro DOMAIN/s: LisH dimerisation motif (InterPro:IPR006594), SRP40, C-terminal (InterPro:IPR007718); Has 101969 Blast hits to 55488 proteins in 2506 species: Archae - 424; Bacteria - 13843; Metazoa - 37674; Fu…	45.4545	14	34	14	1	330	37.6	6.24	0	High	0	135.43	14
FALSE	Master Protein	AT1G49600.1	RNA-binding protein 47A	28.764	10	33	7	1	445	48.5	6	3	High	0	135.42	10
FALSE	Master Protein	AT1G72970.1	Glucose-methanol-choline (GMC) oxidoreductase family protein	32.6599	18	38	18	1	594	65.3	9.72	0	High	0	135.39	18
FALSE	Master Protein	AT4G26650.1	RNA-binding (RRM/RBD/RNP motifs) family protein	39.1209	14	36	11	1	455	49.4	6.71	3	High	0	135.35	14
FALSE	Master Protein	AT5G18620.2	chromatin remodeling factor17	26.3993	26	41	6	1	1072	124.1	5.9	0	High	0	135.34	26
FALSE	Master Protein	AT3G60830.1	actin-related protein 7	51.7906	13	30	13	1	363	39.9	4.89	0	High	0	135.23	13
FALSE	Master Protein	AT1G26570.1	UDP-glucose dehydrogenase 1	34.7193	14	38	7	1	481	52.9	6.18	0	High	0	135.09	14
FALSE	Master Protein	AT5G19140.1	Aluminium induced protein with YGL and LRDR motifs	47.0085	8	33	8	1	234	25	6.2	0	High	0	135	8
FALSE	Master Protein	AT2G34970.1	Trimeric LpxA-like enzyme	30.8219	20	38	19	1	730	81.8	4.68	1	High	0	134.79	20
FALSE	Master Protein	AT2G28190.1	copper/zinc superoxide dismutase 2	49.0741	7	27	7	1	216	22.2	7.01	0	High	0	134.73	7
FALSE	Master Protein	AT1G30400.2	multidrug resistance-associated protein 1	20.2219	24	36	18	1	1622	181.8	6.2	6	High	0	134.69	24
FALSE	Master Protein	AT3G59890.1	Dihydrodipicolinate reductase, bacterial/plant	35.5301	10	35	5	1	349	37.8	7.27	6	High	0	134.61	10
FALSE	Master Protein	AT1G49300.1	RAB GTPase homolog G3E	79.6117	13	38	4	1	206	23	5.07	0	High	0	134.55	13
FALSE	Master Protein	AT3G52180.1	dual specificity protein phosphatase (DsPTP1) family protein	41.6887	15	40	15	1	379	42.6	6.55	0	High	0	134.47	15
FALSE	Master Protein	AT4G35230.1	BR-signaling kinase 1	36.1328	14	35	13	1	512	56.8	5.78	0	High	0	134.46	14
FALSE	Master Protein	AT1G60000.1	RNA-binding (RRM/RBD/RNP motifs) family protein	41.0853	9	35	9	1	258	28.5	5.52	0	High	0	134.43	9
FALSE	Master Protein	AT3G53970.1	proteasome inhibitor-related	41.7219	9	32	9	1	302	32.1	5.12	0	High	0	134.42	9
FALSE	Master Protein	AT4G22930.1	pyrimidin 4	42.7056	11	33	11	1	377	41.9	8.46	0	High	0	134.25	11
FALSE	Master Protein	AT2G27510.1	ferredoxin 3	32.9032	2	19	2	1	155	16.6	5.29	0	High	0	134.24	2
FALSE	Master Protein	AT2G22480.1	phosphofructokinase 5	39.1061	14	34	13	1	537	58.6	7.25	0	High	0	134.24	14
FALSE	Master Protein	AT5G47110.1	Chlorophyll A-B binding family protein	47.2868	10	36	8	1	258	28.6	5.07	0	High	0	134.16	10
FALSE	Master Protein	AT4G14320.1	Zinc-binding ribosomal protein family protein	38.0952	7	48	7	1	105	12.1	10.32	0	High	0	134.14	7
FALSE	Master Protein	AT3G04880.1	DNA-damage-repair/toleration protein (DRT102)	42.9032	11	32	11	1	310	33.2	5.33	0	High	0	134.1	11
FALSE	Master Protein	AT1G45000.1	AAA-type ATPase family protein	43.1078	16	37	2	1	399	44.7	8.19	0	High	0	134.1	16
FALSE	Master Protein	AT3G53650.1	Histone superfamily protein	36.2319	5	39	2	1	138	15.2	10.08	0	High	0	134.09	5
FALSE	Master Protein	AT1G51850.1	Leucine-rich repeat protein kinase family protein	19.1908	16	36	9	1	865	96.1	6.2	4	High	0	134.03	16
FALSE	Master Protein	AT5G11450.1	Mog1/PsbP/DUF1795-like photosystem II reaction center PsbP family protein	30.9764	8	35	8	1	297	33.3	8.75	0	High	0	134.03	8
FALSE	Master Protein	AT4G32760.2	ENTH/VHS/GAT family protein	23.5207	10	32	10	1	676	73	5.14	0	High	0	133.93	10
FALSE	Master Protein	AT1G13900.1	Purple acid phosphatases superfamily protein	27.1341	15	37	15	1	656	73.7	6.18	0	High	0	133.91	15
[truncated: 7,206 more rows]
