# Supplementary material
Source: Preprints.org preprint supplement (doi:10.20944/preprints202107.0372.v1)
Supplement: Supplementary file 3 [file Supplemental Table S10.docx]

Supplemental Table S10: Primer sequence

CDS-*HY2-*F: GGGCGGAAAGGAATTCATGGCTTTATCAATGGAGTTTGG

CDS-*HY2-*R: CGGTGGATCCAAGCTTGCCGATAAATTGTCCTGTTA

*hy2*-LP: CGCAGAGAACAAAGCCTTATG

*hy2*-RP: AGAGAGTGTCCGAGGAAGGAG

LB1.3: ATTTTGCCGATTTCGGAAC

RT-*HY2*- F: ACATAGTTGTATTGGACCTT

RT-*HY2*-R: TACTTCGTTTATCGCTTAC

RT-*Actin*-F: AGGCACCTCTTAACCCTAAAGC

RT-*Actin*- R: GGACAACGGAATCTCTCAGC

*ACT2*-F: TTGTTTGTTTCATTTCCCTTTTTG

*ACT2*-R: GCAGACGTAAGTAAAAACCCAGAGA

*RD29A*-F: GGCGTAACAGGTAAACCTAGAG

*RD29A*-R: TCCGATGTAAACGTCGTCC

*RD29B*-F: GCGC ACCAGTGTATGAATCCTC

*RD29B*-R: TGTGGTCAGAAGACACGACAGG

*DREB2A*-F: AAGGTAAAGGAGGACCAGAG

*DREB2A*-R: ACACAACCAGGAGTCTCAAC
