# Supplementary material
Source: Preprints.org preprint supplement (doi:10.20944/preprints202107.0372.v1)
Supplement: Supplementary file 5 [file Supplemental Table S2.xlsx]

## Sheet: Sheet1
Supplemental Table S2
The data of col4 and hy2 shared quantified proteins under salt stress.
gene	Log2Abundance-col4-mock-1	Log2Abundance-col4-mock-2	Log2Abundance-col4-mock-3	Log2Abundance-col4-NaCl-1	Log2Abundance-col4-NaCl-2	Log2Abundance-col4-NaCl-3	Log2Abundance-hy2-mock-1	Log2Abundance-hy2-mock-2	Log2Abundance-hy2-mock-3	Log2Abundance-hy2-NaCl-1	Log2Abundance-hy2-NaCl-2	Log2Abundance-hy2-NaCl-3
AT4G21960	16.12	16.06	16.21	15.14	15.17	15.21	16.02	15.97	15.97	14.96	14.83	14.95
AT4G12480	16.57	16.64	16.58	15.81	15.68	15.69	17.69	17.64	17.65	16.45	16.55	16.25
AT5G38930	15.14	15.21	15.04	14.27	14.17	14.36	15.91	15.86	15.9	15.25	15.18	15.13
AT4G37520	14.38	14.36	14.44	13.57	13.55	13.63	15.88	15.77	15.88	15.15	15.04	15.17
AT1G08930	16.27	16.14	16.21	15.57	15.41	15.43	15.08	15	15.07	14.34	14.05	14.31
AT4G12880	17.72	17.74	17.74	17.06	16.97	17.04	17.95	17.87	17.92	17.3	17.39	17.25
AT5G60360	18.41	18.29	18.34	17.64	17.68	17.71	17.65	17.61	17.62	17.01	17.02	16.94
AT4G37530	15.68	15.66	15.45	14.91	14.89	14.96	15.42	15.36	15.43	14.71	14.66	14.71
AT1G73260	17.8	17.7	17.76	17.07	17.13	17.06	17.89	17.81	17.97	17.27	17.36	17.23
AT1G28280	17.77	16.31	16.12	14.93	14.97	14.99	16.07	15.98	15.95	14.92	14.74	15.03
AT5G42180	16.81	16.73	16.79	15.23	15.31	15.33	15.77	15.84	15.8	14.77	14.67	14.67
AT2G38310	16.1	15.99	16.02	14.44	14.4	14.55	16.61	16.45	16.56	14.93	14.54	14.77
AT5G64120	16.48	16.44	16.45	15.12	15.13	15.09	16.24	16.21	16.29	15.24	15.16	15.26
AT4G30270	16.03	15.94	16.01	14.62	14.69	14.67	17.42	17.41	17.4	15.82	15.84	15.79
AT2G43620	15.4	15.33	15.35	13.92	14.11	14.03	16.37	16.44	16.51	15.17	14.94	15.28
AT2G38540	17.55	17.44	17.48	16.16	16.21	16.16	17.81	17.82	17.81	16.68	16.61	16.72
AT3G14240	16.97	16.96	17.05	15.79	15.7	15.72	15.33	15.39	15.38	14.22	13.99	14.22
AT5G19890	14.29	14.37	14.43	13.07	12.96	13.41	14.3	14.31	14.43	11.98	12.33	12.31
AT1G15270	16.88	16.97	16.8	15.67	15.63	15.74	17.72	17.92	17.68	17.17	17.2	17.03
AT5G57560	15.52	15.37	15.41	14.3	14.27	14.14	17.78	17.79	17.74	16.72	16.8	16.7
AT5G03610	16.33	16.17	16.31	15.12	15.12	15.15	16.8	16.83	16.75	15.8	15.79	15.85
AT1G56220	16.59	16.5	16.44	15.38	15.38	15.35	16.27	16.26	16.35	15.54	15.49	15.45
AT4G03210	17.56	17.45	17.38	16.43	16.55	16.02	16.37	16.37	16.37	15.33	15.27	15.29
AT2G41410	15.22	15.21	15.16	14.07	14.07	14.1	15.96	16.01	16.06	14.91	15.03	15.05
AT4G22470	17.22	17.32	17.21	16.19	16.15	16.04	16.85	16.77	16.9	15.93	15.77	15.95
AT1G28400	14.55	14.56	14.7	13.5	13.48	13.61	15.37	15.35	15.39	14.06	14.08	14.14
AT4G36430	15.51	15.59	15.51	14.5	14.45	14.48	15.65	15.73	15.79	14.88	14.94	14.93
AT2G37130	15.63	15.67	15.67	14.62	14.63	14.58	16.22	16.2	16.25	15.42	15.46	15.47
AT4G35770	18.3	18.24	18.29	17.28	17.2	17.25	18.27	18.15	18.26	16.78	16.92	16.88
AT3G22060	17.36	17.3	17.36	16.32	16.33	16.25	17.62	17.59	17.65	16.57	16.61	16.66
AT4G25260	16.28	16.37	16.2	15.3	15.16	15.41	15.5	15.35	15.37	14.74	14.55	14.83
AT4G30170	16.86	16.86	16.85	15.93	15.79	15.83	16.15	16.09	16.17	15.27	15.19	15.21
AT5G08000	17.38	17.31	17.3	16.37	16.36	16.29	16.2	16.14	16.25	15.26	15.23	15.18
AT2G43590	14.63	14.6	14.5	13.57	13.62	13.55	15.13	15.22	15.33	14.22	14.12	14.22
AT2G27660	16.68	16.64	16.73	15.75	15.7	15.7	16.07	16.2	16.21	15.26	15.33	15.4
AT3G46280	17.27	17.12	17.18	16.28	16.1	16.27	18.15	18.05	18.2	17.33	17.31	17.27
AT1G75800	16.44	16.37	16.3	15.49	15.29	15.45	16.02	15.95	16.03	15.39	15.26	15.24
AT3G30775	16.79	16.91	16.85	15.83	15.91	15.92	15.74	15.69	15.8	14.99	14.95	14.97
AT2G04570	16.5	16.36	16.49	15.52	15.45	15.56	17.27	17.32	17.43	16.45	16.32	16.27
AT5G64100	17.02	16.92	17	16.04	16.06	16.03	17.55	17.54	17.58	16.77	16.77	16.74
AT3G16370	17.47	17.42	17.41	16.49	16.54	16.54	17.03	16.93	17.04	16.22	16.28	16.32
AT5G25260	16.03	16.03	15.97	15.15	15.02	15.16	16.99	16.98	16.96	15.75	15.68	15.72
AT3G28040	15.95	15.98	15.98	15.18	15.06	15.13	17.54	17.48	17.49	15.88	15.9	15.99
AT5G19120	17.22	17.21	17.26	16.41	16.46	16.31	15.66	15.92	15.81	14.8	14.69	14.73
AT5G15180	16.4	16.38	16.35	15.55	15.48	15.5	16.96	16.82	16.88	16.16	16.18	16.16
AT1G17860	16.73	16.64	16.68	15.84	15.94	15.85	15.56	15.57	15.58	14.87	14.86	14.85
AT2G37710	15.3	15.19	15.17	14.54	14.24	14.47	14.24	14.14	14.25	13.23	13.21	13.28
AT1G30720	16.84	16.74	16.79	16.04	15.93	16.03	16.82	16.76	16.82	15.85	15.8	15.87
AT4G12470	15.79	15.83	15.88	14.98	15	15.11	17.3	17.44	17.42	16.76	16.7	16.78
AT2G22795	16.33	16.26	16.31	15.5	15.54	15.48	16.45	16.33	16.42	15.78	15.76	15.69
AT2G02850	16.12	16.09	16.09	15.32	15.31	15.38	16.21	16.14	16.15	15.52	15.55	15.59
AT1G06760	19.67	19.42	19.6	18.81	18.82	18.8	18.42	18.25	18.4	17.72	17.67	17.86
AT1G29670	15.76	15.75	15.76	15.05	14.97	15.01	16.73	16.72	16.71	15.79	15.81	15.84
AT5G49360	16.86	16.81	16.85	16.1	16.08	16.12	16.58	16.56	16.58	15.93	15.95	15.91
AT1G66180	15.93	15.69	15.78	15.12	15.05	14.97	15.24	15.44	15.32	14.63	14.65	14.74
AT3G18490	17.5	17.51	17.43	16.81	16.69	16.84	17.41	17.39	17.41	16.65	16.62	16.69
AT4G30020	13.92	14.05	14.09	13.4	13.26	13.33	14.28	14.22	14.17	13.58	13.53	13.69
AT5G39580	14.97	15.05	14.97	14.43	14.23	14.3	14.41	14.45	14.4	13.44	13.26	13.47
AT1G23130	13.37	13.97	13.64	12.97	12.66	13.36	14.85	15.3	14.92	14.04	14.09	14.24
AT5G48540	15.26	15.12	15.13	14.51	14.56	14.44	17.97	17.83	17.91	17.21	17.32	17.25
AT3G12610	16.34	16.35	16.37	15.7	15.68	15.7	15.97	15.95	15.97	15.19	15.19	15.19
AT2G38530	17.01	16.89	17.06	16.31	16.39	16.33	16.91	16.86	16.94	16.08	16.08	16.02
AT4G16563	15.36	15.35	15.34	14.78	14.64	14.69	16.07	16.14	16.15	15.5	15.46	15.51
AT2G32060	16.34	16.14	16.25	16.69	16.65	16.53	17.12	17.06	17.09	16.3	16.32	16.3
AT3G13410	15.73	15.64	15.78	15.16	15.13	15.28	17.44	17.26	17.38	16.57	16.52	16.42
AT5G62350	17.28	17.18	17.2	16.97	16.87	16.94	15.52	15.35	15.42	14.85	14.85	14.8
AT2G18040	16.43	16.36	16.37	16.21	16.17	16.03	18.23	18.14	18.26	17.56	17.61	17.48
AT4G22505	14.49	14.71	14.48	13.94	13.61	13.75	17.5	17.42	17.5	16.53	16.64	16.6
AT1G28330	17.98	17.87	17.97	17.37	17.45	17.29	16.49	16.49	16.5	15.78	15.92	15.83
AT1G72970	16.69	16.73	16.68	16.12	16.16	16.12	17.38	17.38	17.41	16.83	16.84	16.76
AT1G75380	16.94	17.02	17.04	16.46	16.46	16.42	16.57	16.57	16.55	16.01	15.91	15.85
AT2G39210	16.16	16.03	16.1	15.6	15.59	15.42	15.5	15.43	15.48	14.8	14.89	14.83
AT3G05200	16.47	16.37	16.49	15.98	15.94	15.81	15.27	15.18	15.16	14.37	14.44	14.47
AT1G20850	15.76	15.81	15.68	15.31	15.35	15.34	16.72	16.7	16.8	16.07	16.18	16.09
AT3G59220	16.75	16.77	16.7	16.33	16.18	16.46	16.72	16.62	16.62	15.92	15.77	15.9
AT1G51850	16.25	16.16	16.19	15.79	15.82	15.85	16.04	16	16.06	15.43	15.38	15.43
AT2G18750	15.97	15.82	15.89	15.45	15.51	15.65	15.48	15.5	15.35	14.83	14.89	14.81
AT5G50200	16.08	16.01	15.97	15.76	15.66	15.72	16.13	16.36	16.07	15.25	15.13	15.3
AT1G66100	15.09	15.1	15.21	14.91	14.88	14.8	15.44	15.41	15.45	14.63	14.84	14.82
AT2G41100	17.28	17.26	17.24	17.02	17.03	16.92	18.87	18.71	18.84	17.94	17.95	17.85
AT4G35350	15.64	15.63	15.55	15.12	15.38	15.49	16.06	16.02	16.06	15.49	15.41	15.41
AT1G75040	15.92	15.92	15.88	15.63	15.67	15.67	16.98	16.95	17.03	16.24	16.27	16.3
AT5G23660	15.23	15.22	15.24	15.13	15.13	15.04	15.51	15.63	15.43	14.82	14.56	14.94
AT3G02730	16.45	16.4	16.35	16.33	16.3	16.33	18.28	18.2	18.27	17.7	17.66	17.65
AT5G28050	15.51	15.49	15.37	15.41	15.32	15.49	16.47	16.5	16.53	15.9	15.85	15.81
AT5G12140	14.85	14.8	14.58	14.88	14.88	14.9	15.85	15.71	15.66	15.04	14.71	15.13
AT1G07140	16.78	16.75	16.79	16.9	16.91	16.95	16.81	16.8	16.92	16.12	16.23	16.09
AT5G58590	13.83	13.92	13.76	13.86	14.04	14.11	15.75	15.71	15.76	14.97	14.75	14.91
AT4G15940	15.17	15.19	15.16	15.39	15.3	15.4	17.11	16.91	16.94	16.32	16.48	16.33
AT4G09650	16.71	16.65	16.73	17.09	17.04	17.13	16.63	16.55	16.61	16	16.02	15.97
AT4G25370	16.07	15.99	15.99	16.39	16.45	16.39	16.28	16.2	16.21	15.58	15.67	15.67
AT4G02530	16.73	16.67	16.76	17.21	17.25	17.15	18.28	18.11	18.2	17.45	17.51	17.43
AT1G15420	14.13	14.2	14.17	14.16	13.97	14.23	15.9	16	16.14	16.82	16.8	17.07
AT1G77030	15.34	15.37	15.36	15.54	15.65	15.62	13.75	13.79	13.8	14.48	14.35	14.57
AT3G18420	16.77	16.57	16.66	17.11	17.1	16.96	16.22	16.04	16.18	16.82	16.77	16.79
AT5G59610	15.28	15.24	15.3	15.58	15.79	15.65	14.95	15.21	15.04	15.8	15.64	16.01
AT1G06720	13.97	13.99	13.98	14.43	14.25	14.55	15.45	15.71	15.32	16.24	16.04	16.26
AT5G44610	15.76	15.86	15.72	15.05	15.01	15.06	15.66	15.61	15.6	15.08	15.16	15.05
AT4G39090	16.94	16.86	16.9	16.15	16.22	16.14	16.17	16.1	16.19	15.67	15.62	15.64
AT4G11650	15.31	15.14	15.17	14.64	14.62	14.58	14.85	14.72	14.74	14.49	14.63	14.53
AT1G10070	17.14	17.11	17.08	15.97	15.85	15.79	16.61	16.66	16.59	16.23	16.06	16.32
AT2G39460	17.59	17.43	17.51	16.41	16.51	16.41	16.45	16.35	16.46	16.32	16.35	16.27
AT3G24100	17.59	17.52	17.79	16.68	16.56	16.53	16.68	16.85	16.89	16.5	16.58	16.44
AT5G52810	17.04	16.97	17.04	16.04	16.03	15.99	15.9	15.87	15.83	15.42	15.48	15.45
AT4G13615	16.54	16.4	16.47	15.48	15.44	15.5	16.15	16.07	16.18	15.72	15.85	15.73
AT1G64370	18.09	18.01	18.13	17.06	17.13	17.21	17.29	17.25	17.21	16.73	16.61	16.69
AT1G12440	15.82	15.76	15.86	14.96	14.9	14.97	15.93	16.04	16.09	15.42	15.4	15.58
AT2G33830	15.37	15.31	15.29	14.54	14.48	14.47	15.36	15.34	15.33	14.76	14.9	15.12
AT3G10760	16.45	16.42	16.32	15.54	15.71	15.51	15.44	15.5	15.5	15.07	15.16	15.11
AT1G21500	15.9	15.76	15.87	15.02	15.06	15.04	16.99	16.95	16.96	16.85	16.93	16.77
AT4G14320	19.35	19.27	19.36	18.53	18.62	18.49	19.58	19.47	19.63	19.34	19.36	19.24
AT1G02360	15.67	15.57	15.72	14.91	14.94	14.9	15.98	16	15.97	15.43	15.44	15.58
AT1G21400	16.49	16.4	16.46	15.68	15.68	15.74	16.01	16.08	16.06	15.58	15.53	15.57
AT3G48340	15.42	15.41	15.33	14.59	14.64	14.71	16.43	16.4	16.43	15.97	15.86	16
AT1G06210	17.33	17.3	17.36	16.61	16.7	16.49	15.55	15.6	15.58	15.37	15.34	15.34
AT2G43520	15.57	15.56	15.65	14.86	14.84	14.95	15.71	15.63	15.66	15.1	15.19	15.14
AT4G12340	16.18	16.29	16.24	15.58	15.46	15.57	15.06	15.1	15.12	15.18	15.16	15.26
AT1G27210	15.36	15.43	15.44	14.69	14.7	14.75	14.87	14.95	14.81	14.67	14.56	14.59
AT3G52120	16.25	16.05	16.18	15.65	15.34	15.42	16.5	16.5	16.51	16.26	16.26	16.21
AT5G66170	16.27	16.33	16.32	15.64	15.52	15.7	15.27	15.22	15.35	14.78	14.75	14.67
AT5G64400	16.71	16.65	16.68	15.98	16.05	15.97	17.38	17.34	17.31	17.05	17.02	16.9
AT4G21620	16.37	16.33	16.3	15.67	15.76	15.51	17.29	17.21	17.35	16.97	17.03	16.83
AT1G80180	15.55	15.67	15.64	14.91	14.95	14.95	15.44	15.35	15.41	15.07	14.89	15.03
AT3G56340	16.73	16.78	16.67	16.04	16.09	16.03	15.64	15.64	15.65	15.63	15.59	15.54
AT2G19730	15.96	16.02	15.98	15.34	15.33	15.3	16.03	15.99	15.97	15.5	15.54	15.45
ATCG00065	18.8	18.65	18.68	18.07	18.07	18.02	18.64	18.54	18.69	18.39	18.42	18.32
AT5G17870	18.69	18.38	18.72	17.82	17.89	18.1	18.96	18.87	18.85	18.71	18.77	18.78
AT5G01870	16.89	16.81	16.85	16.2	16.27	16.13	17.44	17.36	17.44	16.9	16.88	16.86
AT5G13630	16.4	16.41	16.4	15.77	15.73	15.76	16.83	16.83	16.85	16.25	16.26	16.25
AT3G54620	15.42	15.43	15.34	14.76	14.77	14.72	15.18	15.08	15.2	14.92	14.84	14.92
AT3G04630	15.13	15.04	15.13	14.38	14.49	14.51	16.63	16.54	16.49	16.33	16.24	16.29
AT1G19350	16.85	16.69	16.76	16.19	16.17	16.05	17.84	17.64	17.89	17.18	17.05	17.36
AT2G37080	15.87	15.89	15.85	15.22	15.23	15.28	15.68	15.69	15.63	15.53	15.57	15.43
AT3G45970	16.7	16.56	16.66	16.03	16	16.04	17.56	17.49	17.41	16.94	16.86	16.94
AT5G51890	15.87	15.89	15.93	15.3	15.19	15.31	16.67	16.58	16.7	16.14	16.2	16.15
AT2G31410	16.51	16.37	16.36	15.75	15.8	15.84	16.39	16.3	16.4	16.09	16.06	15.91
AT1G49740	15.05	15.12	15.18	14.52	14.45	14.55	16.42	16.66	16.56	16.1	16.05	16.04
AT1G54850	15.79	15.79	15.76	15.23	15.12	15.16	14.8	14.85	14.73	14.52	14.44	14.44
AT1G02890	15.59	15.45	15.64	14.97	14.87	15.03	15.66	15.66	15.61	15.15	15.06	15.22
AT4G35570	15.06	15.04	15.01	14.35	14.46	14.47	16.29	16.21	16.27	16.15	16.09	16.19
AT4G33420	15.69	15.72	15.7	15.14	15.06	15.08	15.24	15.27	15.32	15.05	14.98	15.06
AT3G23450	18.49	18.45	18.48	17.87	17.93	17.82	18.8	18.67	18.8	18.55	18.59	18.45
AT3G09000	16.3	16.2	16.26	15.65	15.71	15.62	16.2	16.08	16.09	15.79	15.88	15.78
AT4G33060	16.08	16.15	16.09	15.55	15.5	15.51	16.16	16.13	16.23	15.79	15.81	15.78
AT2G43710	15.3	15.23	15.32	15.88	15.89	15.91	14.87	14.81	14.8	14.96	14.92	15.06
AT5G65020	15.22	15.23	15.15	15.76	15.85	15.77	16.24	16.16	16.19	16.14	16.12	16.11
AT2G42590	16.14	16.04	16.13	16.69	16.78	16.7	16.35	16.29	16.32	16.24	16.26	16.21
AT1G78380	16.7	16.74	16.84	17.39	17.44	17.33	18.2	18.14	18.27	18.15	18.21	18.18
AT2G38760	13.36	13.69	13.45	14.09	14.14	14.2	14.66	14.87	14.76	14.85	14.9	14.96
AT1G35720	16.45	16.47	16.46	17.12	17.06	17.14	16.41	16.46	16.49	16.35	16.36	16.34
AT3G25520	15.09	15.11	15.05	15.73	15.79	15.75	17.01	16.84	17.06	17.14	17.25	17.08
AT1G53310	16.39	16.43	16.38	17.1	17.15	17.07	17	16.91	17.03	17.39	17.38	17.3
AT5G27470	16.61	16.52	16.64	17.3	17.35	17.27	17.09	17.08	17.14	17.21	17.25	17.18
AT4G23100	17.06	16.96	16.97	17.73	17.76	17.73	16.83	16.77	16.83	16.99	17.02	16.97
AT2G30870	15.96	16.01	15.97	16.72	16.75	16.7	16.68	16.64	16.68	16.68	16.71	16.59
AT5G47770	15	15.02	15	15.79	15.84	15.75	15.15	15.04	15.18	15.14	15.19	15.1
AT5G39740	15.87	15.75	15.68	16.58	16.62	16.46	18.3	18.26	18.32	18.46	18.58	18.34
AT2G38750	16.64	16.63	16.71	17.55	17.54	17.53	16.74	16.67	16.77	16.87	16.67	16.73
AT3G52340	16.39	16.36	16.41	16.98	17.01	16.94	15.78	15.79	15.78	15.96	15.98	15.95
AT5G27290	14.92	15.07	15.15	15.7	15.51	15.72	16.5	16.5	16.5	16.35	16.36	16.38
AT1G09310	15.41	15.41	15.41	16.01	16.04	15.98	16.32	16.27	16.26	15.99	15.98	16.01
AT1G35340	14.83	14.88	14.9	15.47	15.55	15.37	16.54	16.53	16.48	16.38	16.49	16.46
AT3G28715	16.2	16.22	16.16	16.81	16.85	16.72	16.66	16.67	16.63	16.85	16.85	16.92
AT3G04830	14.85	14.94	14.81	15.44	15.42	15.54	16.24	16.21	16.24	16.43	16.26	16.35
AT5G49970	15.28	15.32	15.26	15.87	15.88	15.88	15.76	15.7	15.74	16.21	16.21	16.18
AT5G66090	15.63	15.61	15.55	16.16	16.2	16.22	16.97	16.97	17.01	16.65	16.73	16.71
AT5G22330	15.22	15.34	15.26	15.87	15.85	15.91	15.86	15.84	15.88	16.13	16.2	16.09
ATCG00670	15.64	15.62	15.62	16.17	16.28	16.24	15.56	15.55	15.52	15.57	15.58	15.6
AT2G27170	14.81	14.96	14.85	15.53	15.44	15.46	14.73	14.72	14.77	15.15	15.02	15.11
AT3G16260	16.42	16.52	16.46	17.11	17.06	17.05	14.64	15	14.74	15.04	14.87	15.13
AT5G51100	17.83	17.92	17.88	18.48	18.5	18.47	17.21	17.28	17.15	17.64	17.63	17.63
AT3G11630	16.07	16.05	16.11	16.64	16.77	16.64	15.57	15.46	15.63	15.51	15.54	15.53
AT2G46820	17.27	17.21	17.27	17.84	17.96	17.78	18.04	17.95	18.02	17.63	17.67	17.62
AT1G55890	16.09	16.22	16.03	16.68	16.7	16.79	15.68	15.8	15.59	15.83	15.72	15.83
AT1G78370	16.56	16.56	16.6	17.19	17.23	17.16	16.5	16.45	16.43	16.55	16.54	16.47
AT2G23390	14.7	14.79	14.71	15.34	15.38	15.33	15.29	15.39	15.34	15.57	15.51	15.57
AT4G17040	16.17	16.18	16.14	16.73	16.82	16.82	16.38	16.59	16.52	16.65	16.61	16.73
AT1G75990	15.55	15.55	15.61	16.06	16.3	16.18	16.55	16.82	16.57	16.61	16.63	16.51
AT5G43750	15.06	15.1	15.02	15.7	15.62	15.72	15.28	15.29	15.37	14.82	14.9	14.86
AT2G42600	16.11	16.17	16.14	16.77	16.76	16.76	16.04	16.04	16.07	16.4	16.43	16.39
AT4G35850	15.82	15.84	15.8	16.44	16.41	16.47	16.76	16.76	16.78	16.93	16.76	16.84
AT1G68790	14.95	15.06	14.88	15.59	15.54	15.66	15.37	15.45	15.47	15.7	15.67	15.73
AT1G48830	15.36	15.27	15.33	15.95	15.99	15.91	15.14	15.08	15.14	15.24	15.23	15.2
AT3G61990	15.13	15.36	15.02	15.95	15.53	15.8	14.56	14.42	14.52	14.5	14.66	14.36
AT1G04420	16.28	16.41	16.33	16.97	16.96	17.01	16.84	16.87	16.94	17.01	16.92	16.91
AT4G09720	14.42	14.57	14.56	15.26	14.95	15.29	15.08	15.06	15.28	15.27	15.2	15.19
AT1G60080	14.48	14.68	14.1	15.11	15	15.16	15.07	15.26	15.13	15.35	15.26	15.32
AT3G20330	16.61	16.68	16.61	17.27	17.29	17.29	16.15	16.15	16.19	16.16	16.14	16.1
AT1G73170	13.11	13.09	13.08	13.86	13.66	13.7	14.72	14.72	14.63	14.86	14.88	14.8
AT5G10450	14.85	14.89	14.83	15.44	15.49	15.58	17.53	17.64	17.53	17.81	17.59	17.56
AT2G25530	15.2	14.97	15.1	15.71	15.79	15.76	14.78	14.91	14.92	15.33	15.13	15.23
AT3G54890	17.05	16.97	17.08	17.66	17.76	17.67	18.18	18.14	18.17	17.78	17.88	17.81
AT1G02150	15.2	15.2	15.25	15.88	15.88	15.9	16.49	16.55	16.55	16.7	16.68	16.78
AT3G46630	15.91	15.84	15.95	16.63	16.59	16.49	15.08	15.01	15.08	15.15	15.09	15.13
AT5G46580	15.57	15.69	15.62	16.37	16.23	16.29	15.74	15.74	15.75	16.03	16.02	16.03
AT1G65410	16.09	16.14	16.02	16.77	16.71	16.8	15.65	15.81	15.7	15.7	15.7	15.77
AT1G70760	14.16	14.3	14.34	14.9	14.97	14.98	16.3	16.13	16.22	15.88	15.96	15.81
AT1G45000	16.16	16.13	16.17	16.83	16.81	16.85	16.43	16.52	16.42	16.69	16.54	16.81
ATCG00740	16.25	16.22	16.16	16.87	16.95	16.87	16.33	16.3	16.34	16.64	16.64	16.6
AT2G37400	14.38	14.2	14.16	14.96	14.72	15.1	13.73	13.77	13.72	13.8	13.76	13.82
AT4G34920	14.79	14.78	14.77	15.48	15.49	15.43	15.16	15.17	15.1	15.28	15.32	15.31
AT5G03160	14.62	14.75	14.7	15.42	15.35	15.35	15.62	15.62	15.7	15.9	15.9	15.82
AT5G48790	15.88	15.86	15.9	16.46	16.63	16.61	14.44	14.46	14.35	14.74	14.6	14.84
AT4G39040	13.04	12.98	13.04	13.75	13.58	13.77	14.18	14.2	14.39	14.14	13.94	14.21
AT1G19150	15.73	16.06	15.84	16.55	16.65	16.56	18.09	18.05	18.06	18.05	17.88	18.03
AT5G46070	15.75	15.73	15.71	16.46	16.4	16.42	16.63	16.62	16.69	17.05	17.07	17.04
AT5G15200	15.56	15.64	15.61	16.3	16.3	16.31	16.7	16.65	16.77	16.81	16.82	16.75
AT3G16000	15.53	15.54	15.59	16.25	16.26	16.29	16.21	16.23	16.25	16.41	16.42	16.36
AT4G08520	15.41	15.53	15.61	16.22	16.27	16.19	16.13	16	16.03	15.72	15.8	15.72
AT2G25830	16.38	16.37	16.37	17.09	17.12	17.05	15.64	15.52	15.57	15.56	15.63	15.54
AT5G19680	14.34	14.44	14.32	15.16	15.01	15.07	12.04	12.26	11.97	12.06	12.06	12.34
AT1G29930	15.58	15.72	15.59	16.35	16.25	16.36	11.2	11.54	11.35	11.64	11.41	11.65
AT4G01150	16.26	16.11	16.3	16.97	17.02	16.96	16.91	16.81	16.91	16.46	16.48	16.36
AT4G25100	16.17	16.02	16.12	16.82	16.95	16.86	17.6	17.53	17.54	17.69	17.74	17.63
AT3G62310	14.98	15.11	14.99	15.86	15.76	15.77	13.99	14.07	13.99	14.44	14.25	14.47
AT1G12410	14.57	14.4	14.31	15.2	15.18	15.25	14.77	14.73	14.75	14.61	14.76	14.79
AT4G02620	15.97	16.06	15.94	16.82	16.82	16.74	17.02	16.91	16.98	16.69	16.68	16.74
AT4G04640	16.4	16.27	16.36	17.18	17.19	17.16	17	16.98	17.03	17.29	17.32	17.24
AT2G27290	14.79	14.85	14.9	15.72	15.63	15.7	17.09	17.17	17.09	16.64	16.71	16.69
AT3G18480	13.18	13.55	13.09	14.21	13.79	14.33	14.7	14.88	14.74	14.84	14.62	14.69
AT2G32500	14.18	14.1	13.95	15.04	14.77	14.95	15.61	15.49	15.56	15.85	15.75	15.66
AT3G13160	15.12	15.16	15.02	15.91	16.04	15.94	15.96	16.01	16	16.01	15.96	16.04
AT2G34430	14.4	14.42	14.42	15.24	15.24	15.2	15.42	15.62	15.54	15.5	15.46	15.63
AT3G05060	15.07	15.07	14.96	15.9	15.96	15.97	16.33	16.31	16.32	16.7	16.68	16.67
AT1G01770	12.03	12.29	11.91	13.04	12.51	13.36	15.05	15.13	15.09	15.47	15.34	15.62
AT2G23670	16.48	16.39	16.45	17.45	17.44	17.37	16.91	16.88	16.92	16.43	16.36	16.37
AT1G62780	14.77	15.02	14.92	15.87	15.89	15.92	17.45	17.49	17.51	17.45	17.36	17.41
AT3G52730	16.8	16.8	16.9	17.88	17.91	17.86	17.09	17.07	17	16.72	16.72	16.69
AT2G41430	16.07	16.1	16.09	15.48	15.24	15.4	17.01	16.96	17.11	16.44	16.48	16.42
AT2G05520	16.57	16.58	16.54	16.12	16.05	15.98	16.85	16.91	16.97	16.73	16.72	16.68
AT4G29410	17.06	17.03	17.08	16.48	16.49	16.47	18.67	18.56	18.65	18.26	18.25	18.2
AT5G19140	15.91	15.98	15.91	15.29	15.4	15.38	16.82	16.81	16.79	16.43	16.35	16.39
AT1G19700	15.26	15.31	15.18	14.69	14.7	14.67	16.16	16.26	16.21	15.84	15.92	15.93
AT5G02530	18	17.97	18.06	17.47	17.48	17.37	18.19	18.13	18.24	17.89	18	17.86
AT5G16470	17.43	17.24	17.31	16.82	16.68	16.79	17.32	17.28	17.35	17.01	17.04	17.15
AT5G56870	15.89	15.85	15.9	15.3	15.28	15.33	15.96	15.87	16	15.41	15.36	15.35
AT5G10020	16.57	16.62	16.55	16.03	16.02	15.99	16.13	16.15	16.2	15.8	15.68	15.83
AT1G09750	17.45	17.39	17.47	16.9	16.9	16.85	17.69	17.71	17.67	17.25	17.2	17.22
AT1G68590	18.5	18.26	18.42	17.83	17.95	17.73	18.48	18.39	18.34	18.21	18.28	18.21
AT2G10940	16.55	16.43	16.52	15.93	15.94	15.96	17.94	17.89	17.99	17.78	17.82	17.78
AT5G47550	15.49	15.3	15.31	14.78	14.87	14.77	15.32	15.08	14.97	14.65	14.86	14.9
AT2G21580	16.12	16.12	16.21	15.58	15.56	15.61	16.56	16.4	16.55	16.49	16.67	16.58
AT3G52470	17.27	17.11	17.06	16.69	16.67	16.4	15.77	15.76	15.87	15.55	15.57	15.58
AT1G61380	16.85	16.83	16.93	16.27	16.31	16.35	15.46	15.4	15.37	14.81	15	15.01
AT3G52040	16.22	16.28	16.27	15.73	15.76	15.62	16.92	16.86	17.01	16.76	16.77	16.83
AT1G04480	16.58	16.52	16.58	15.97	16.07	15.97	16.52	16.54	16.6	16.3	16.31	16.23
AT4G16830	17.01	16.9	17	16.44	16.45	16.4	16.71	16.72	16.73	16.31	16.27	16.28
AT1G79470	16.33	16.41	16.38	15.86	15.93	15.71	15.46	15.52	15.58	15.42	15.32	15.36
AT5G59460	15.83	15.78	15.85	15.29	15.28	15.24	16.38	16.26	16.29	16.01	15.99	16.05
AT2G23120	14.67	14.57	14.54	14.05	14.12	13.98	14.9	14.78	14.84	15.24	15.18	15.09
AT1G47128	16.98	16.97	16.97	16.45	16.44	16.48	17.21	17.22	17.2	16.7	16.7	16.77
AT1G33590	17.14	17.06	17.12	16.55	16.58	16.56	17.35	17.3	17.38	16.77	16.84	16.79
AT5G40780	15.98	15.82	15.9	15.3	15.26	15.5	15.72	15.7	15.74	15.14	15.21	15.24
AT5G64130	15.09	15.02	15.02	14.53	14.5	14.44	15.71	15.68	15.7	15.69	15.65	15.66
AT4G15093	16.17	15.99	16.12	15.54	15.55	15.58	18.04	17.88	17.96	17.56	17.46	17.51
AT1G14900	15.6	15.66	15.62	15.06	15.06	15.11	16.18	16.24	16.15	15.8	15.83	15.8
AT2G38140	17.75	17.61	17.67	17.14	17.18	17.08	16.96	16.92	16.96	16.7	16.76	16.66
AT2G25060	17.42	17.36	17.36	16.85	16.87	16.8	17.14	17.08	17.17	16.62	16.71	16.67
AT1G15400	15.83	15.67	15.74	15.15	15.3	15.19	16.13	16.19	16.17	16.02	16.12	16.02
AT4G05150	15.78	15.87	15.84	15.28	15.26	15.36	15.33	15.38	15.37	15.05	14.99	15.08
AT5G62640	17	16.94	16.97	16.53	16.36	16.42	15.38	15.48	15.31	15.29	15.19	15.35
AT2G21045	16.33	16.25	16.34	15.95	15.58	15.78	16.46	16.57	16.54	16.02	15.92	15.88
AT4G37820	15.64	15.61	15.62	15.08	15.14	15.09	15.65	15.59	15.67	15.21	15.27	15.16
AT1G11545	17.61	17.61	17.7	17.16	17.14	17.03	16.54	16.56	16.52	16.01	16.1	15.97
AT2G15220	15.8	15.82	15.8	15.34	15.25	15.25	12.49	12.67	12.46	12.99	12.6	12.8
AT2G32600	16.92	17.01	16.91	16.44	16.41	16.43	16.28	16.47	16.32	16.38	16.26	16.45
AT1G08630	16.1	16.27	16.18	15.59	15.61	15.77	16.27	16.23	16.28	15.98	15.96	15.96
AT3G08770	15.54	15.56	15.53	15.07	15.02	14.98	16.67	16.72	16.71	16.37	16.35	16.46
AT5G37720	15.69	15.64	15.7	15.21	15.15	15.16	15.39	15.39	15.35	15.26	15.18	15.22
AT1G19900	14.37	14.42	14.48	13.83	13.82	14.01	16.34	16.15	16.35	15.83	15.93	15.95
AT1G24160	16.95	16.95	16.98	16.46	16.46	16.44	16.42	16.38	16.4	16.09	16.1	16.07
AT1G78460	15.64	15.72	15.86	15.24	15.36	15.08	15.71	15.69	15.75	15.4	15.32	15.34
AT4G16190	16.78	16.63	16.81	16.25	16.22	16.22	17.06	17.02	17.05	16.51	16.49	16.6
AT3G49490	15.89	15.87	15.91	15.43	15.36	15.34	16.15	16.24	16.13	15.8	15.71	15.85
AT4G04830	16.91	16.85	16.94	16.39	16.51	16.27	16.24	16.29	16.4	15.94	16.02	16.01
AT2G45180	18.02	17.97	18.02	17.48	17.48	17.48	16.71	16.67	16.7	16.71	16.66	16.57
AT5G23395	13.59	13.62	13.54	13.01	13.16	13.06	15.84	15.8	15.84	16.09	16.05	16.06
AT3G04640	20.8	20.81	21	20.3	20.38	20.42	19.77	19.85	19.82	19.47	19.41	19.36
AT1G64660	14.92	14.92	15.02	14.45	14.35	14.54	15.33	15.35	15.24	14.82	14.7	14.82
AT3G55560	16.13	15.94	16.16	15.55	15.56	15.62	16.15	16.03	16.13	15.99	15.97	15.95
AT5G40450	16.12	16.08	16.1	15.59	15.6	15.6	16.25	16.2	16.25	15.87	15.88	15.85
AT5G05600	15.98	15.93	16.05	15.45	15.51	15.42	16.39	16.24	16.36	15.97	15.95	15.94
AT1G21670	15.98	15.98	15.98	15.5	15.4	15.54	16.5	16.53	16.53	15.95	15.92	15.97
AT3G58120	15.64	15.39	15.32	15.08	14.87	14.95	14.9	15.01	14.86	15.11	15.07	15.26
AT4G23820	15.14	15.06	15.07	14.45	14.58	14.75	16.46	16.42	16.47	16.13	16.24	16.17
AT3G55770	15.09	15.17	15	14.55	14.6	14.62	17.09	17.07	17.03	16.69	16.62	16.73
AT1G03220	16.52	16.48	16.53	16.05	16.04	15.95	16.57	16.55	16.59	16.29	16.22	16.25
AT1G62480	15.04	15.01	15.02	14.57	14.52	14.5	16.1	15.98	16.15	16.06	16.13	16.05
AT5G64260	17.13	17.04	17.13	16.58	16.64	16.58	16.38	16.31	16.36	15.92	15.96	15.96
AT3G25920	16.18	16.1	16.12	15.65	15.63	15.65	16.35	16.3	16.36	16.03	16.11	16.09
AT3G19220	15.33	15.43	15.31	14.92	14.86	14.83	16.93	17.13	16.97	17.04	16.75	17.07
AT2G30620	18.92	18.88	18.93	18.42	18.44	18.4	17.09	17.13	17.18	17.23	17.28	17.16
AT1G05850	16.39	16.27	16.41	15.94	15.86	15.82	16.56	16.49	16.53	15.98	15.97	15.97
AT1G01490	16.11	16.19	16.15	15.62	15.74	15.64	15.03	15.11	15.25	14.93	14.82	14.91
AT1G32330	15.62	15.37	15.36	14.89	15.01	15.02	14.04	13.97	14.09	13.94	13.8	13.96
AT3G05900	16.66	16.58	16.63	16.13	16.16	16.12	16.49	16.44	16.49	16.09	16.12	16.06
AT4G39860	16.35	16.33	16.35	15.94	15.84	15.79	15.99	16.02	15.99	15.69	15.62	15.66
AT5G67360	16.11	16.12	16.07	15.6	15.58	15.66	16.97	16.88	16.88	16.43	16.43	16.44
AT5G20230	15.2	15.23	15.23	14.8	14.7	14.72	14.96	14.89	14.91	14.66	14.52	14.69
AT2G01190	17.13	17.11	17.17	16.64	16.71	16.65	16.89	16.82	16.85	16.53	16.54	16.5
AT2G43030	16.45	16.36	16.42	15.92	15.97	15.91	16.54	16.49	16.54	16.19	16.24	16.18
AT1G65900	16.44	16.36	16.44	15.97	15.88	15.96	15.83	15.83	15.81	15.49	15.61	15.47
AT3G08030	16.46	16.39	16.45	15.94	15.97	15.95	16.86	16.82	16.89	16.4	16.38	16.37
AT5G25540	16.1	15.95	16.01	15.6	15.45	15.53	17.35	17.32	17.23	17.15	17.26	17.21
AT1G47200	15.59	15.56	15.43	15.08	14.9	15.11	15.33	15.57	15.37	15.43	15.3	15.48
AT5G11600	17.04	17.02	16.97	16.55	16.49	16.56	17.7	17.59	17.73	17.36	17.42	17.33
AT1G28290	16.78	16.79	16.81	16.32	16.33	16.3	18.33	18.26	18.36	17.96	17.97	17.97
AT4G30280	15.79	15.63	15.71	15.24	15.25	15.22	16.66	16.73	16.71	16.34	16.3	16.34
AT4G24690	15.9	15.87	15.74	15.33	15.39	15.39	16.07	16.08	16.06	15.63	15.57	15.64
AT1G14685	16.14	16.1	16.14	15.7	15.6	15.64	15.45	15.4	15.39	15.07	15.07	15.18
AT3G15450	15.93	15.88	15.93	15.42	15.46	15.44	15.9	15.84	15.9	15.43	15.43	15.52
AT1G54460	16.58	16.6	16.54	16.15	16.12	16.03	16.56	16.39	16.57	16.5	16.44	16.48
AT4G15560	17.03	16.9	16.98	16.48	16.46	16.57	16.16	16.07	16.22	15.66	15.67	15.7
AT4G31360	17.42	17.34	17.45	16.92	16.93	16.94	14.94	14.85	14.93	14.67	14.67	14.58
AT5G54770	16.51	16.45	16.46	16.01	15.97	16.04	16.03	16.07	16.03	15.6	15.55	15.61
AT1G13930	17.21	17.14	17.2	16.72	16.74	16.67	16.96	16.88	16.94	17.12	17.18	17.12
AT2G43120	14.06	14.24	14.07	13.58	13.67	13.69	14.82	14.87	14.84	14.62	14.53	14.51
AT4G20430	15.55	15.53	15.58	15.07	15.11	15.08	17.29	17.19	17.16	17.17	17.04	17.28
AT3G51600	19.5	19.44	19.46	19	18.99	19.01	18.49	18.52	18.53	18.55	18.38	18.57
AT3G26740	16.75	16.68	16.63	16.23	16.23	16.21	15.77	15.68	15.73	15.38	15.35	15.38
AT4G36880	16.72	16.64	16.65	16.13	16.29	16.18	16.62	16.6	16.64	16.29	16.17	16.26
AT3G10720	17.31	17.28	17.26	16.81	16.85	16.8	17.65	17.6	17.64	17.39	17.38	17.4
AT5G03380	15.34	15.66	15.54	15.07	15	15.11	15.7	15.78	15.78	15.45	15.42	15.42
AT1G23460	15.17	15.08	14.91	14.63	14.57	14.63	16.51	16.42	16.54	16.12	16.15	16.11
AT4G21280	16.07	15.96	16	15.52	15.54	15.57	15.71	15.68	15.67	15.57	15.6	15.6
AT5G55050	15.53	15.51	15.47	15.07	15.04	15.03	16.72	16.66	16.73	16.36	16.39	16.28
AT3G07170	16.3	16.19	16.28	15.8	15.76	15.83	15.34	15.32	15.33	15.19	15.27	15.19
AT2G41850	16.04	16.1	16.06	15.64	15.58	15.63	15.18	15.13	15.15	14.74	14.73	14.81
AT4G23890	16.77	16.79	16.74	16.26	16.29	16.37	15.74	15.76	15.77	15.88	15.95	15.91
AT1G19020	17.08	17.07	17.02	16.87	16.54	16.32	17.04	17.02	16.82	16.55	16.55	16.37
AT1G20220	14.83	15.05	14.85	14.43	14.49	14.45	15.61	15.66	15.66	15.61	15.57	15.62
AT3G56720	15.73	15.59	15.61	15.19	15.25	15.12	16.47	16.53	16.52	16.38	16.39	16.42
AT3G45300	16.38	16.27	16.3	15.86	15.89	15.83	16.13	16.11	16.12	15.8	15.84	15.85
AT4G05400	15.83	15.89	15.89	15.42	15.48	15.35	15.45	15.43	15.52	15.4	15.41	15.42
AT4G12070	15.07	15.06	15.15	14.7	14.52	14.69	15.81	15.84	15.75	15.5	15.55	15.49
AT2G41020	15.5	15.75	15.67	15.09	15.28	15.23	15.02	15.12	14.91	14.96	14.83	14.98
AT3G55970	14.41	14.47	14.49	14.02	14.04	13.93	16.21	16.21	16.31	15.83	15.82	15.85
AT4G39200	15.26	15.24	15.29	14.8	14.84	14.78	15.83	15.7	15.81	15.82	15.82	15.87
AT1G21380	15.82	15.86	15.9	15.36	15.41	15.43	15.48	15.49	15.54	15.27	15.31	15.32
AT4G02480	15.68	15.66	15.69	15.25	15.16	15.24	15.78	15.72	15.8	15.44	15.39	15.37
AT2G04550	15.16	15.16	15.22	14.77	14.74	14.65	15.55	15.67	15.49	15.58	15.49	15.65
AT4G17330	15.84	15.86	15.86	15.4	15.39	15.42	15.94	15.91	15.96	15.68	15.69	15.66
AT1G20110	16.71	16.65	16.69	16.21	16.25	16.21	16.97	17.04	16.99	16.71	16.7	16.73
AT5G27630	15.49	15.49	15.48	14.98	15.06	15.06	15.91	15.93	15.83	15.79	15.7	15.9
AT2G20280	17.13	17.06	17.08	16.62	16.68	16.63	16.86	16.78	16.85	16.46	16.47	16.5
AT5G59950	16.39	16.37	16.4	15.94	15.96	15.89	16.31	16.28	16.31	15.94	16.02	15.95
AT3G07090	16.61	16.45	16.56	16.05	16.14	16.08	15.18	15.32	15.23	15	15	15.14
AT3G29250	16.77	16.78	16.75	16.37	16.34	16.25	16.62	16.56	16.64	16.44	16.47	16.46
AT4G17950	17.43	17.39	17.51	16.96	17.05	16.98	16.47	16.55	16.38	16.23	16.07	16.31
AT3G56850	15.83	15.68	15.88	15.34	15.28	15.46	16.44	16.59	16.47	16.37	16.29	16.49
AT1G51800	15.91	16.03	15.91	15.52	15.39	15.59	16.17	16.13	16.17	15.75	15.74	15.82
AT1G14870	15.33	15.23	15.27	14.77	14.82	14.89	15.15	15.04	15.12	14.74	14.73	14.89
AT4G24680	15.88	15.88	15.85	15.42	15.4	15.44	16.35	16.32	16.35	16.1	16.09	16.05
AT1G79720	16.61	16.52	16.61	16.21	16.14	16.06	15.19	15.19	15.21	14.81	14.85	14.84
AT2G35900	16.44	16.28	16.49	16.02	15.97	15.88	18.41	18.36	18.35	17.95	17.99	17.97
AT5G18760	15.12	15.15	15.44	14.75	14.86	14.78	15.35	15.31	15.14	15.18	15.13	15.23
AT5G45280	16.81	16.67	16.79	16.32	16.32	16.3	16.5	16.42	16.5	15.9	16.01	15.96
AT4G20010	15.67	16.01	15.7	15.49	15.19	15.38	13.44	13.54	13.73	13.43	13.29	13.47
AT4G09620	17.77	17.7	17.83	17.35	17.37	17.25	15.52	15.67	15.63	15.5	15.51	15.65
AT3G16780	16.82	16.67	16.76	16.26	16.31	16.34	15.9	15.8	15.8	15.63	15.79	15.81
AT4G25180	15.42	15.53	15.5	15.05	15.07	15.01	15.38	15.44	15.27	15.22	15.12	15.32
AT4G33220	15.83	15.83	15.91	15.41	15.36	15.44	16.67	16.69	16.64	16.21	16.19	16.17
AT4G39260	15.69	15.66	15.71	15.27	15.28	15.22	15.81	15.73	15.81	15.43	15.47	15.4
AT2G43140	14.77	14.9	14.88	14.51	14.23	14.47	17.36	17.37	17.43	17.18	17.23	17.18
AT5G47210	16.64	16.59	16.65	16.18	16.18	16.19	17.13	17.1	17.13	16.8	16.81	16.81
AT5G58130	15.24	15.2	15.27	14.82	14.77	14.83	15.19	15.19	15.16	14.93	15.05	15
AT2G05380	17.76	17.69	17.89	17.41	17.48	17.28	16.34	16.34	16.38	16.27	16.25	16.2
AT4G01700	16.44	16.54	16.52	16.04	16.1	16.04	15.6	15.58	15.44	15.17	15.18	15.19
AT1G02640	17.03	16.96	16.99	16.58	16.53	16.53	16.13	16.13	16.19	15.69	15.72	15.74
AT3G54400	17.11	17.01	17.06	16.63	16.64	16.61	16.76	16.74	16.75	16.46	16.43	16.36
AT1G69410	16.6	16.57	16.49	16.13	16.05	16.16	16.61	16.57	16.63	16.45	16.33	16.41
AT2G38400	15.9	15.8	15.87	15.46	15.38	15.42	16.29	16.19	16.32	15.79	15.84	15.88
AT1G75350	16.66	16.56	16.66	16.18	16.2	16.17	17.09	17.04	17.02	16.94	16.97	16.9
AT1G69510	15.39	15.36	15.43	14.96	14.94	14.97	16.52	16.49	16.57	16.5	16.52	16.47
AT4G34620	16.53	16.45	16.56	16.09	16.07	16.07	16.22	16.18	16.17	16.08	16.09	16.06
AT1G48160	15.64	15.65	15.66	15.26	15.18	15.22	15.14	15.13	15.19	14.92	14.88	14.96
AT1G77180	16.84	16.78	16.86	16.4	16.43	16.36	16.56	16.49	16.56	16.32	16.34	16.28
AT2G46930	16.32	16.29	16.33	15.83	15.86	15.95	16.4	16.4	16.43	15.93	15.8	15.99
AT3G53740	18.77	18.7	18.81	18.3	18.36	18.34	17.29	17.28	17.26	17.36	17.34	17.3
AT1G79650	16.77	16.61	16.75	16.29	16.28	16.29	17.3	17.32	17.3	17.31	17.17	17.27
AT1G74000	15.39	15.6	15.43	14.99	15.06	15.11	16.07	16.01	16.05	15.78	15.78	15.74
AT4G27320	16.12	16.09	16.07	15.64	15.65	15.7	16.2	16.19	16.2	16.13	16.05	16.11
AT3G08670	14.48	14.75	14.81	14.32	14.14	14.36	15.85	15.77	15.9	15.46	15.54	15.42
AT1G61690	16.03	16.02	15.99	15.57	15.59	15.59	15.36	15.38	15.44	15.32	15.28	15.37
AT1G17370	15.96	15.87	15.97	15.49	15.51	15.55	17.18	17.1	17.15	16.81	16.88	16.86
AT5G08260	16.77	16.76	16.75	16.34	16.3	16.36	16.59	16.61	16.53	16.48	16.36	16.45
AT5G61130	16.57	16.72	16.48	16.23	16.23	16.05	15.84	15.65	15.8	15.46	15.45	15.47
AT1G29660	15.56	15.59	15.48	15.2	15	15.17	17.07	17.09	17.13	16.59	16.6	16.7
AT5G12200	16.83	16.79	16.78	16.39	16.4	16.32	16.17	16.16	16.13	15.93	15.92	15.91
AT4G34480	15.89	15.83	15.86	15.43	15.43	15.45	17.15	17.17	17.26	16.82	16.81	16.81
AT5G16940	15.31	15.57	15.46	15.05	14.96	15.13	16.68	16.78	16.7	16.76	16.44	16.85
AT5G43060	16.49	16.39	16.46	16.03	16.07	16.02	15.59	15.61	15.65	15.34	15.38	15.4
AT3G24800	15.79	15.76	15.74	15.33	15.29	15.41	16.49	16.45	16.54	16.22	16.32	16.16
AT5G09440	15.89	15.88	15.85	15.45	15.5	15.41	17.99	17.98	17.86	17.41	17.52	17.38
AT1G53840	16.14	16.1	16.19	15.77	15.71	15.71	16.19	16.13	16.18	15.82	15.86	15.86
AT1G16610	16.18	16.09	16.16	15.74	15.78	15.67	18.11	17.95	18.08	17.77	17.83	17.7
AT1G59359	17.19	17.14	17.2	16.73	16.77	16.77	16.55	16.48	16.53	16.39	16.42	16.36
AT1G60730	15.56	15.72	15.61	15.24	15.25	15.19	16.86	16.72	16.72	16.59	16.61	16.67
AT2G39050	17.56	17.48	17.51	17.06	17.11	17.16	15.6	15.59	15.67	15.48	15.34	15.33
AT2G40660	17.03	16.96	17.02	16.6	16.64	16.53	17.51	17.48	17.52	17.3	17.36	17.26
AT4G28910	16.14	16.16	16.12	15.81	15.72	15.64	16.18	16.12	16.15	15.98	15.95	15.95
AT4G31840	16.52	16.46	16.53	16.07	16.09	16.08	17.24	17.15	17.2	16.62	16.66	16.67
AT5G38470	16.24	16.2	16.17	15.75	15.83	15.79	17.67	17.64	17.68	17.59	17.58	17.44
AT1G27090	15.66	15.65	15.61	15.25	15.23	15.2	15.98	15.92	15.97	15.72	15.73	15.7
AT2G03440	16.65	16.48	16.61	16.15	16.17	16.2	16.51	16.46	16.56	16.31	16.3	16.35
AT1G52050	16.49	16.52	16.46	16.12	16.05	16.08	15.99	16.02	15.98	15.59	15.61	15.61
AT3G51890	15.38	15.26	15.35	14.83	14.97	14.94	16.23	16.21	16.29	15.99	15.96	16.01
AT3G06300	16.3	16.31	16.28	15.9	15.92	15.86	17.17	17.15	17.23	16.91	16.87	16.91
AT4G15610	17.9	17.81	17.98	17.56	17.53	17.38	18.79	18.65	18.7	18.58	18.55	18.47
AT1G73230	14.16	14.43	14.47	13.89	14.05	13.94	16.04	16.07	16.06	15.84	15.88	15.84
AT3G15356	17.78	17.72	17.72	17.3	17.27	17.42	16.99	16.97	17.07	16.78	16.68	16.77
AT1G20440	16.2	16.12	16.17	15.76	15.78	15.71	16.62	16.56	16.58	16.31	16.34	16.31
AT3G20250	15.53	15.41	15.49	15.03	15.09	15.08	15.92	15.9	15.89	15.69	15.65	15.69
AT5G03700	15.38	15.24	15.22	14.92	14.8	14.89	16.07	16.07	16.07	15.8	15.79	15.74
AT1G31440	16.1	16.09	16.07	15.66	15.68	15.68	15.97	15.92	15.98	15.6	15.62	15.59
AT4G08770	14.49	14.38	14.48	13.96	14.11	14.05	16.77	16.68	16.7	16.41	16.43	16.44
AT4G30800	16.61	16.62	16.52	16.22	16.18	16.15	17.73	17.58	17.59	17.69	17.69	17.66
AT5G24890	14.72	14.8	14.79	14.37	14.28	14.45	14.62	14.48	14.65	14.4	14.4	14.31
AT2G21230	16.25	16.33	16.32	15.88	15.97	15.93	15.36	15.38	15.47	15.41	15.31	15.31
AT1G79340	16.49	16.42	16.47	16.1	16.06	16.01	16.73	16.72	16.73	16.49	16.52	16.42
AT3G01190	16.54	16.48	16.51	16.13	16.12	16.07	16.43	16.37	16.44	16.17	16.13	16.09
AT5G23020	16.58	16.5	16.56	16.14	16.19	16.11	15.18	15.12	15.11	14.65	14.73	14.65
AT1G76680	15.82	15.78	15.81	15.42	15.41	15.37	15.39	15.37	15.41	15.21	15.21	15.19
AT5G43130	15.08	15.01	15.07	14.62	14.72	14.64	16.45	16.42	16.35	16.15	16.21	16.16
AT4G32930	16.18	16.12	16.08	15.66	15.79	15.72	14.36	14.34	14.41	14.05	14.15	14.13
AT3G55430	15.96	15.94	16.04	15.57	15.64	15.52	17.76	17.67	17.75	17.26	17.31	17.26
AT5G03340	15.47	15.48	15.54	15.08	15.09	15.11	16.3	16.33	16.28	16.22	16.22	16.17
AT4G38710	16.88	16.81	16.84	16.43	16.48	16.41	16.48	16.45	16.55	16.29	16.34	16.28
AT2G45640	17.31	17.3	17.29	16.8	17.02	16.86	16.43	16.36	16.41	16.42	16.53	16.44
AT5G41340	17.1	17.08	17.08	16.66	16.69	16.74	19	18.95	19.05	18.71	18.85	18.7
AT5G16270	15.21	15.25	15.24	14.8	14.78	14.94	14.69	14.85	14.83	14.61	14.55	14.58
AT5G13200	15.56	15.5	15.55	15.2	15.18	15.02	15.6	15.56	15.77	15.65	15.59	15.47
AT1G75750	16.65	16.59	16.61	16.23	16.23	16.21	16.4	16.34	16.42	16.35	16.35	16.32
AT2G35880	16.35	16.24	16.25	15.85	15.87	15.85	16.7	16.6	16.68	16.52	16.58	16.52
AT5G10560	15.99	15.98	16	15.56	15.63	15.59	15.78	15.79	15.81	15.56	15.54	15.57
AT3G02080	17.49	17.49	17.56	17.12	17.15	17.08	17.49	17.38	17.43	17.42	17.51	17.45
AT1G05805	14.52	14.61	14.71	14.27	14.2	14.2	15.73	15.68	15.64	15.44	15.45	15.43
AT2G17560	17.95	17.87	17.92	17.48	17.53	17.53	16.98	16.83	16.9	16.66	16.63	16.66
AT3G16530	16.3	16.24	16.28	15.9	15.86	15.88	16.7	16.64	16.69	16.15	16.19	16.16
AT2G41840	16.32	16.29	16.34	15.92	15.95	15.91	16.35	16.31	16.33	16.22	16.22	16.23
AT1G58290	15.86	15.92	15.99	15.53	15.58	15.49	16.4	16.4	16.4	16.03	16.01	16.04
AT2G05920	15.64	15.57	15.62	15.2	15.22	15.21	16.29	16.24	16.32	16.02	16.03	16.02
AT2G34300	15.85	15.82	15.89	15.53	15.44	15.41	14.64	14.73	14.6	14.48	14.4	14.48
AT2G21270	16.71	16.62	16.71	16.33	16.27	16.26	15.3	15.26	15.3	15.01	15.03	15.09
AT3G57520	16.33	16.3	16.23	15.91	15.84	15.9	15.82	15.82	15.87	15.63	15.67	15.68
AT5G66590	16.3	16.13	16.3	15.81	15.94	15.8	17.69	17.7	17.7	17.36	17.39	17.49
AT2G43550	17.32	17.17	17.19	16.78	16.87	16.86	14.89	14.8	14.83	14.45	14.43	14.53
AT2G30930	16.86	16.79	16.8	16.45	16.48	16.36	16.78	16.68	16.72	16.45	16.42	16.32
AT1G20450	16.46	16.37	16.44	16.03	16.03	16.03	16.82	16.76	16.75	16.53	16.53	16.47
AT1G12080	15.07	15.07	15.1	14.7	14.64	14.74	14.92	14.99	14.98	14.9	14.75	14.82
AT5G61210	15.24	15.33	15.36	14.88	14.99	14.93	15.73	15.75	15.82	15.45	15.47	15.58
AT3G17940	16.33	16.33	16.37	15.96	15.94	15.94	16.99	16.94	16.97	16.72	16.7	16.65
AT5G43070	15.75	15.87	15.79	15.43	15.45	15.38	15.25	15.1	15.15	15.33	15.4	15.2
AT5G25270	15.04	15.12	15.03	14.62	14.72	14.66	14.23	14.23	14.32	14.02	14	14.11
AT4G08320	15.8	15.77	15.8	15.4	15.43	15.37	14.55	14.51	14.59	14.49	14.58	14.53
AT1G22280	16	16.05	16.04	15.63	15.67	15.62	17.31	17.36	17.2	16.98	17.02	17
AT1G78830	16.09	16.03	16.04	15.65	15.67	15.68	16.9	16.87	16.91	16.47	16.52	16.47
AT1G54170	15.75	15.67	15.72	15.31	15.36	15.31	15.48	15.46	15.48	15.2	15.22	15.25
AT1G33520	16.47	16.49	16.47	16.15	16.07	16.04	16.48	16.54	16.54	16.45	16.36	16.4
AT3G11780	17.2	17.11	17.09	16.79	16.72	16.74	17.06	16.95	16.96	16.66	16.62	16.55
AT3G13222	14.19	14.5	14.55	13.92	14.07	14.11	14.99	14.98	14.92	14.85	14.82	14.88
AT3G03920	15.31	15.27	15.27	14.84	14.92	14.96	14.4	14.5	14.42	14.63	14.55	14.57
AT3G59400	13.4	13.78	13.49	13.2	13.12	13.24	14.11	14.14	14.28	13.67	13.57	13.6
AT1G02500	16.23	16.23	16.33	15.88	15.88	15.88	16.97	16.85	16.97	16.68	16.74	16.65
AT5G57000	14.59	14.67	14.78	14.18	14.35	14.36	14.74	14.84	14.87	14.54	14.48	14.61
AT2G41380	15.78	15.87	15.78	15.42	15.4	15.44	16.03	15.95	16	15.65	15.65	15.79
AT3G54130	16.37	16.51	16.36	16.04	16	16.05	16.18	16	16.2	15.87	15.83	15.85
AT3G22850	16.38	16.39	16.33	15.97	16.06	15.93	17.63	17.53	17.63	17.35	17.42	17.28
AT3G43980	18.29	18.2	18.16	17.84	17.86	17.81	17.54	17.41	17.5	17.39	17.38	17.34
AT4G18070	16.07	16.05	15.96	15.66	15.62	15.66	16.07	16	16.09	15.85	15.95	15.85
AT5G13850	15.1	15.26	15.2	14.94	14.74	14.72	15.61	15.52	15.57	15.69	15.57	15.67
AT4G22666	16.49	16.52	16.49	16.22	15.99	16.15	16.89	16.81	16.94	16.55	16.56	16.63
AT2G17760	15.09	14.96	15.09	14.7	14.69	14.64	16.17	16.11	16.16	15.96	15.82	15.76
AT1G23390	15.88	15.84	15.84	15.49	15.43	15.49	15.9	15.97	15.97	15.42	15.29	15.5
AT4G22150	16.34	16.31	16.31	15.98	15.93	15.92	16.16	16.13	16.16	15.95	15.95	15.89
AT3G07880	16.03	15.97	16.05	15.58	15.69	15.62	15.47	15.46	15.52	15.16	15.19	15.13
AT5G52440	16.35	16.38	16.31	16	15.93	16	16.62	16.7	16.67	16.96	16.86	16.86
AT1G52000	15.45	15.5	15.49	15.14	15.08	15.08	15.89	15.8	15.89	15.47	15.47	15.48
AT1G77510	16.93	16.86	16.91	16.53	16.55	16.49	16.9	16.83	16.91	16.58	16.61	16.55
AT5G19230	15.74	15.68	15.72	15.37	15.33	15.31	15.97	15.95	16.05	15.65	15.76	15.78
AT1G53670	16.45	16.29	16.4	16.06	16.03	15.94	16.71	16.61	16.77	16.67	16.71	16.6
AT3G22380	16.16	16.15	16.15	15.78	15.79	15.78	16.14	16.15	16.16	15.9	15.91	15.9
AT1G73350	14.48	14.54	14.48	14.09	14.02	14.24	15.87	15.88	15.89	15.73	15.6	15.69
AT4G22670	16.38	16.34	16.31	15.98	15.94	15.97	16.17	16.25	16.21	16.07	16.06	16.07
AT3G47070	17.64	17.51	17.62	17.2	17.28	17.16	18.35	18.34	18.4	18.6	18.58	18.55
AT1G54080	16.26	16.26	16.23	15.87	15.89	15.86	15.39	15.4	15.55	15.43	15.28	15.3
AT3G14160	15.89	15.91	16	15.61	15.61	15.45	15.4	15.36	15.34	15.12	15.17	15.12
AT4G26450	15.93	16.02	15.94	15.65	15.53	15.59	15.6	15.6	15.66	15.39	15.4	15.44
AT2G34357	16.89	17.13	16.72	16.55	16.49	16.61	16.46	16.45	16.37	16.29	16.22	16.31
AT5G55530	16.06	15.99	16.03	15.61	15.65	15.66	16.49	16.45	16.52	16.22	16.25	16.21
AT4G38740	16.09	16.04	16.1	15.7	15.74	15.66	15.72	15.69	15.74	15.41	15.4	15.32
AT1G72010	15.34	15.27	15.35	15.03	14.96	14.88	16.75	16.81	16.84	16.46	16.47	16.45
AT3G54760	15.53	15.47	15.52	15.12	15.14	15.14	15.7	15.62	15.69	15.53	15.54	15.52
AT4G39230	16.68	16.69	16.69	16.34	16.33	16.26	16.95	16.92	16.97	16.73	16.79	16.73
AT1G66150	15.39	15.34	15.35	14.97	14.98	15	15.6	15.71	15.65	15.56	15.54	15.57
AT3G21290	15.06	15.1	15.02	14.69	14.62	14.76	15.55	15.43	15.59	15.33	15.38	15.32
AT3G52240	15.06	15.18	15.09	14.78	14.59	14.86	15.97	15.92	16.13	15.75	15.81	15.8
AT3G03590	16.96	17	16.97	16.62	16.66	16.53	16.41	16.5	16.49	16.47	16.45	16.49
AT3G61260	16.4	16.29	16.34	15.96	16.03	15.93	15.38	15.36	15.41	15.43	15.47	15.43
AT5G09760	16.09	16.12	16.04	15.68	15.73	15.75	16.21	16.18	16.2	15.87	15.86	15.89
AT1G27695	17.34	17.42	17.43	17.09	17.02	16.99	15.94	15.99	15.96	15.58	15.59	15.54
AT5G25610	17.24	17.12	17.26	16.86	16.84	16.81	18.48	18.34	18.34	17.97	18.01	17.85
ATCG01310	16.82	16.77	16.81	16.42	16.46	16.41	16.4	16.37	16.41	16.34	16.34	16.31
AT5G07470	17.84	17.81	17.81	17.45	17.46	17.44	18.27	18.31	18.39	17.94	17.95	17.92
AT1G59710	16.39	16.33	16.31	16.09	15.9	15.93	17.58	17.72	17.54	17.37	17.33	17.46
AT1G51820	15.37	15.36	15.44	15.11	14.86	15.08	15.67	15.78	15.68	15.6	15.43	15.56
AT5G14450	17.15	17.12	17.13	16.77	16.82	16.72	16.3	16.26	16.36	16.27	16.21	16.26
AT2G26210	16.99	17.07	17.07	16.71	16.66	16.66	16.48	16.36	16.46	16.36	16.28	16.22
AT1G34750	15.49	15.41	15.37	15.02	14.99	15.18	15.84	15.74	15.76	15.6	15.49	15.41
AT2G23350	16.37	16.31	16.36	15.94	16.03	15.98	16.75	16.65	16.71	16.49	16.49	16.44
AT1G11910	16.6	16.56	16.55	16.23	16.22	16.22	16.59	16.6	16.65	16.26	16.33	16.31
AT1G09560	16.52	16.44	16.56	16.19	16.15	16.09	16.36	16.36	16.41	16.12	16.2	16.16
AT4G08850	15.53	15.44	15.49	15.14	15.14	15.11	15.41	15.39	15.39	15.21	15.2	15.21
AT3G16857	16.12	16.26	16.13	15.83	15.8	15.75	15.31	15.4	15.28	15.17	15.02	15.11
AT3G04570	17.56	17.52	17.49	17.14	17.17	17.18	16.35	16.44	16.52	16.28	16.46	16.4
AT1G33240	15.99	15.96	15.89	15.55	15.57	15.64	15.76	15.67	15.81	15.62	15.61	15.59
AT1G61620	15.97	15.99	15.98	15.61	15.61	15.64	15.41	15.36	15.45	15.11	15.19	15.13
AT3G54350	15.05	15.02	15.06	14.64	14.68	14.73	15.83	15.78	15.85	15.69	15.63	15.71
AT5G54430	16.93	16.8	16.91	16.48	16.55	16.55	16.26	16.27	16.35	16.15	16.22	16.24
AT5G07460	17.05	17.06	17.05	16.69	16.7	16.68	16.83	16.82	16.89	16.58	16.54	16.45
AT3G18035	15.25	15.29	15.21	14.86	14.89	14.91	15.29	15.24	15.23	15.08	15.1	15.07
AT5G21170	13.71	13.73	13.65	13.34	13.39	13.29	17.59	17.55	17.55	17.45	17.3	17.42
AT5G06870	17.27	17.26	17.22	16.87	16.9	16.9	17.2	17.22	17.29	16.95	16.98	16.98
AT1G09700	16.31	16.26	16.3	15.95	15.92	15.91	15.36	15.39	15.41	15.19	15.16	15.1
AT5G18900	16.35	16.2	16.14	15.87	15.86	15.89	15.77	15.7	15.73	15.44	15.45	15.35
AT1G26550	16.4	16.37	16.41	15.98	16.1	16.02	16.58	16.51	16.6	16.21	16.26	16.12
AT3G17390	15.74	15.7	15.74	15.36	15.39	15.35	16.02	15.95	16.03	15.77	15.76	15.73
AT3G25150	15.22	15.23	15.19	14.86	14.87	14.84	15.91	15.81	15.97	15.69	15.7	15.69
AT3G18740	16.25	16.24	16.23	15.9	15.88	15.87	18.1	18	18.09	17.81	17.82	17.8
AT1G29090	15.5	15.74	15.64	15.28	15.19	15.34	17.52	17.71	17.43	17.59	17.53	17.51
AT3G11700	15.26	15.25	15.26	14.89	14.82	14.98	15.86	15.8	15.82	15.63	15.56	15.64
AT1G33980	15.67	15.55	15.64	15.29	15.18	15.31	15.81	15.74	15.83	15.75	15.74	15.71
AT5G54310	15.01	14.88	14.97	14.6	14.67	14.52	16.54	16.57	16.62	16.34	16.32	16.42
AT3G10700	17.33	17.22	17.35	17	16.96	16.87	16.8	16.92	16.87	16.75	16.66	16.77
AT1G79850	17.24	17.23	17.2	16.85	16.82	16.9	16.5	16.46	16.49	16.15	16.16	16.15
AT2G45820	15.64	15.61	15.61	15.28	15.31	15.22	16.35	16.29	16.37	16.44	16.5	16.45
AT4G38930	16.06	16	16.06	15.68	15.76	15.61	16.39	16.42	16.44	16.27	16.24	16.12
AT3G54680	15.44	15.49	15.62	15.17	15.14	15.18	15.08	15.23	15.09	15.07	15	15.1
AT3G60245	16.01	15.99	16.01	15.67	15.64	15.63	16.45	16.38	16.43	16.31	16.32	16.24
AT3G27700	15.12	15.05	15.08	14.73	14.71	14.76	16.55	16.59	16.59	16.37	16.4	16.4
AT4G34870	16.31	16.32	16.32	15.96	15.98	15.95	17.4	17.35	17.44	17.14	17.15	17.11
AT1G75240	16.34	16.42	16.35	15.97	16.08	16	16.68	16.6	16.61	16.44	16.45	16.31
AT3G56410	15.07	15.06	15.07	14.76	14.66	14.73	14.98	15.1	15.07	14.84	14.76	15.03
AT1G14740	15.33	15.36	15.25	14.96	14.83	15.06	16.3	16.22	16.35	15.98	16.04	15.95
AT4G15800	17.29	17.37	17.29	16.97	16.99	16.95	16.21	16.39	16.27	16.27	16.32	16.34
AT4G23270	16.85	16.67	16.79	16.42	16.34	16.5	16.19	16.19	16.34	15.84	15.81	15.93
AT2G03640	15.89	15.82	15.89	15.47	15.56	15.54	15.98	15.99	16.04	15.75	15.72	15.78
AT2G35605	17.97	17.97	18.04	17.63	17.67	17.62	16.56	16.51	16.57	16.61	16.72	16.67
AT5G56940	14.77	14.59	14.49	14.12	14.28	14.37	14.54	14.45	14.54	14.76	14.81	14.47
AT1G09210	16.81	16.7	16.75	16.38	16.44	16.38	16.91	16.85	16.92	16.72	16.75	16.68
AT5G56360	16.56	16.47	16.5	16.15	16.19	16.14	16.17	16.1	16.13	16.08	16.08	16.03
AT4G00360	15.89	15.95	15.9	15.54	15.59	15.55	15.74	15.85	15.91	15.65	15.59	15.58
AT2G04160	15.93	15.97	15.96	15.53	15.62	15.66	17.04	16.96	16.98	16.84	16.81	16.86
AT2G01820	16.8	16.75	16.75	16.38	16.39	16.51	15.47	15.42	15.43	15.12	15.11	15.21
AT5G41870	16.77	16.91	16.76	16.53	16.27	16.44	16.16	16.33	16.24	16.03	16	16
AT1G03350	16.71	16.53	16.67	16.27	16.31	16.28	16.09	16.04	16.02	15.87	15.93	15.89
AT5G09680	16.52	16.54	16.57	16.21	16.23	16.15	16.22	16.17	16.26	15.98	15.96	15.97
AT3G62140	15.48	15.4	15.38	14.96	15.01	15.24	16.28	16.27	16.41	16.21	16.18	16.28
AT4G32460	15.72	15.88	15.67	15.43	15.36	15.45	16.06	16.07	16.09	15.71	15.67	15.61
AT1G07360	16.21	16.13	16.15	15.81	15.9	15.74	16.56	16.63	16.65	16.43	16.43	16.44
AT1G48620	16.11	16.01	16.05	15.71	15.74	15.66	16.38	16.4	16.4	16.18	16.2	16.1
AT4G01610	16.36	16.3	16.38	16.03	16.02	15.99	16.45	16.39	16.48	16.12	16.11	16.14
AT1G01080	16.36	16.22	16.29	15.96	15.96	15.94	16.39	16.39	16.44	16.2	16.18	16.18
AT5G15960	15.66	15.65	15.67	15.39	15.26	15.23	15.92	16.04	15.93	15.79	15.87	15.87
AT4G36650	16.04	15.91	15.89	15.63	15.63	15.55	15.18	15.28	15.15	14.87	14.88	14.84
AT1G68060	17.41	17.51	17.41	17.08	17.11	17.11	17.01	16.94	17.11	16.81	16.89	16.87
AT4G19410	16.55	16.5	16.52	16.18	16.15	16.18	16.57	16.57	16.62	16.23	16.31	16.29
AT1G70520	16.54	16.42	16.53	16.21	16.13	16.11	15.6	15.6	15.56	15.42	15.34	15.42
AT5G02770	16.61	16.61	16.61	16.25	16.26	16.29	16.97	17.01	17.01	16.97	16.98	16.99
AT3G11800	16.15	16.06	16.11	15.76	15.82	15.73	16.3	16.32	16.31	16.05	15.93	15.99
AT1G70180	16.57	16.61	16.62	16.27	16.29	16.23	16.39	16.25	16.39	16.18	16.13	16.12
AT4G25900	16.48	16.43	16.41	16.11	16.04	16.12	17.42	17.4	17.38	16.99	17.04	17.08
AT2G39780	16.92	16.95	16.94	16.6	16.65	16.52	16.56	16.66	16.5	16.39	16.36	16.45
AT1G33811	17.27	17.24	17.36	16.98	17	16.9	16.07	16.08	16.07	15.74	15.79	15.82
AT2G45220	16.45	16.43	16.5	16.09	16.13	16.18	15.97	16.02	16.05	15.93	15.89	15.95
AT1G78860	16.58	16.52	16.69	16.17	16.26	16.32	15.17	15.16	15.16	14.74	14.76	14.89
AT3G23920	15.75	15.72	15.85	15.43	15.4	15.46	15.98	15.87	15.97	15.46	15.53	15.42
AT1G09970	15.28	15.41	15.32	15.02	14.9	15.06	14.65	14.71	14.58	14.5	14.42	14.69
AT4G38680	13.87	14.02	13.97	13.6	13.58	13.67	14.71	14.7	14.84	14.5	14.51	14.6
AT3G02540	14.96	14.94	14.93	14.6	14.64	14.57	16.42	16.35	16.42	16.01	16.07	16.08
AT4G22485	16.7	16.62	16.64	16.29	16.28	16.37	15.67	15.68	15.68	15.28	15.24	15.23
AT2G32710	14.89	15.06	14.96	14.76	14.53	14.59	15.07	15.02	15.3	15.16	14.98	14.95
AT4G39400	17.21	17.11	17.14	16.79	16.86	16.79	16.59	16.55	16.64	16.22	16.23	16.25
AT1G49760	15.76	15.69	15.72	15.38	15.4	15.36	16.23	16.16	16.2	15.98	16.02	15.97
AT1G01350	16.9	16.88	16.88	16.56	16.56	16.52	16.02	15.99	16.05	15.74	15.84	15.69
AT3G26060	16.41	16.29	16.42	16.03	16.07	16	17.07	16.96	17.02	16.97	16.97	16.89
AT3G50370	15.99	15.96	15.97	15.66	15.62	15.62	16	16.01	16.01	15.83	15.8	15.85
AT1G14570	16.59	16.55	16.57	16.21	16.24	16.24	15.95	15.94	16.03	15.81	15.77	15.72
AT5G55040	14.97	15.01	15.03	14.69	14.71	14.6	14.56	14.64	14.73	14.5	14.54	14.63
AT5G07870	16.84	17.49	17.39	16.98	16.86	16.86	17.01	17.1	16.98	17	17.11	16.94
AT3G49960	16.11	16.05	16.12	15.71	15.77	15.8	15.7	15.74	15.71	15.28	15.29	15.26
AT5G63180	15.62	15.53	15.59	15.25	15.2	15.27	17.06	17.18	17.05	16.88	16.76	16.82
AT1G76180	16	15.96	16.07	15.67	15.72	15.59	16.07	15.93	16.05	15.69	15.8	15.64
AT2G31350	15.56	15.62	15.45	15.34	15.19	15.08	15.32	14.96	15.22	15.37	15.11	15.2
AT2G14170	16.71	16.7	16.73	16.33	16.42	16.38	17.07	17.01	17.08	16.87	16.91	16.83
AT2G22475	16.14	16.2	16.16	15.85	15.86	15.77	15.8	15.79	15.82	15.62	15.59	15.59
AT1G49590	15.71	15.56	15.74	15.33	15.33	15.33	17.24	17.46	17.33	17.55	17.2	17.55
AT3G61490	14.58	14.81	14.67	14.34	14.24	14.48	15.44	15.51	15.41	15.01	15.1	15.18
AT1G50480	16.73	16.71	16.75	16.4	16.42	16.38	16.19	16.19	16.25	16.02	16.01	15.98
AT3G20820	16.43	16.4	16.4	16.09	16.1	16.04	15.67	15.61	15.66	15.48	15.52	15.53
AT2G04880	16.17	16.12	16.14	15.82	15.78	15.81	15.99	16	16.03	15.84	15.79	15.8
AT2G46580	16.17	16.14	16.2	15.85	15.89	15.76	15.47	15.44	15.53	15.22	15.33	15.32
AT4G22745	15.29	15.26	15.24	14.99	14.93	14.85	15.06	15.07	15.07	15	14.9	15.05
AT5G46250	15.93	15.95	15.86	15.69	15.46	15.58	15.65	15.59	15.67	15.51	15.48	15.05
AT1G17880	16.16	16.07	16.14	15.85	15.73	15.8	17.18	17.19	17.19	16.99	16.96	16.99
AT3G05220	16.76	16.69	16.79	16.44	16.41	16.39	16.6	16.61	16.69	16.28	16.32	16.24
AT5G55730	17.09	17.01	17.04	16.69	16.72	16.73	15.92	15.85	15.92	15.63	15.61	15.58
AT4G30480	16.13	16.06	16.09	15.78	15.75	15.74	15.77	15.77	15.74	15.53	15.51	15.58
AT5G60170	14	14.24	14.27	13.91	13.89	13.73	16.63	16.65	16.65	16.43	16.37	16.38
AT4G20260	16.97	16.9	16.91	16.59	16.63	16.56	15.97	15.91	15.97	15.86	15.88	15.85
AT1G16520	15.35	15.17	15.3	14.95	14.92	14.95	15.47	15.34	15.39	15.36	15.32	15.38
AT4G28780	15.62	15.56	15.64	15.26	15.3	15.23	15.35	15.34	15.32	15.23	15.21	15.2
AT4G01870	15.33	15.34	15.28	15	14.99	14.94	15.5	15.53	15.48	15.48	15.45	15.48
AT2G18030	16.9	16.89	17	16.56	16.6	16.64	15.13	15.09	15.03	15.06	14.93	15.07
AT1G09070	16.77	16.76	16.69	16.34	16.5	16.39	16.66	16.52	16.44	16.34	16.37	16.39
AT5G43940	16.81	16.75	16.82	16.47	16.5	16.42	17.25	17.19	17.26	16.96	17	16.96
AT2G40630	14.55	14.64	14.6	14.27	14.24	14.3	14.85	15.01	14.89	14.82	14.82	14.86
AT1G21750	16.86	16.77	16.84	16.48	16.52	16.47	17.41	17.36	17.4	17.19	17.21	17.16
AT3G52400	16.28	16.22	16.22	15.88	16	15.83	15.75	15.68	15.72	15.51	15.49	15.61
AT5G11580	16.48	16.52	16.49	16.18	16.14	16.15	17.03	17	16.98	16.81	16.79	16.71
AT1G48610	15.86	15.84	15.85	15.51	15.57	15.49	16.53	16.47	16.5	16.39	16.43	16.39
AT5G66570	16.16	16.08	16.17	15.81	15.85	15.76	16.8	16.8	16.82	16.65	16.65	16.61
AT3G23900	15.6	15.45	15.52	15.18	15.22	15.19	16.79	16.69	16.74	16.53	16.44	16.5
AT4G26480	17.33	17.26	17.24	16.94	16.93	16.97	15.35	15.27	15.39	15.28	15.22	15.29
AT3G07660	16.07	16.06	16	15.71	15.71	15.72	16.17	16.13	16.21	16.01	15.95	16.02
AT1G49600	16.29	16.2	16.21	15.89	15.97	15.86	15.49	15.52	15.61	15.29	15.36	15.33
AT5G12850	16.2	15.9	15.92	15.65	15.56	15.77	14.95	15.05	15.14	15.01	14.81	14.8
AT5G64110	17.45	17.24	17.49	17.02	17.12	17.05	15.36	15.41	15.24	15.32	15.22	15.34
AT5G46020	15.92	16.12	16.13	15.74	15.5	15.92	15.38	15.63	15.71	15.16	15	15.48
AT2G20760	17.27	17.19	17.27	16.93	16.93	16.89	16.25	16.17	16.23	16.06	16.11	16.05
AT2G35940	14.34	14.41	14.51	14.03	14.01	14.26	12.88	12.86	13.06	13.03	12.78	13.31
AT5G65910	16.74	16.71	16.72	16.44	16.38	16.37	16.26	16.1	16.14	15.99	16.01	15.97
AT4G13180	16.36	16.39	16.4	16.03	16.04	16.1	15.08	15.1	15.09	14.96	14.93	14.93
AT4G35220	14.8	14.71	14.71	14.4	14.42	14.42	15.39	15.35	15.48	15.37	15.39	15.29
AT2G33800	17.28	17.19	17.27	16.92	16.97	16.88	17.68	17.61	17.67	17.27	17.3	17.19
AT1G11480	16.48	16.44	16.49	16.17	16.13	16.15	16.23	16.23	16.25	16.11	16.06	16.12
AT2G41835	15.48	15.55	15.56	15.23	15.17	15.23	14.49	14.38	14.41	14.21	14.21	14.35
AT1G51760	16.19	16.2	16.16	15.85	15.82	15.89	16.46	16.34	16.32	16.27	16.24	16.23
AT4G00230	17.04	16.99	16.97	16.66	16.64	16.69	15.63	15.63	15.56	15.42	15.37	15.4
AT5G40850	14	13.9	13.88	13.57	13.61	13.63	14.08	14.17	14.15	14.06	13.99	14.15
AT5G51590	16.56	16.65	16.49	16.22	16.18	16.32	16.5	16.63	16.63	16.46	16.5	16.53
AT5G40950	17.52	17.57	17.68	17.2	17.31	17.28	17.38	17.26	17.37	17.44	17.41	17.58
AT3G54360	16.38	16.34	16.39	16.04	16.06	16.04	16.78	16.77	16.81	16.56	16.55	16.54
AT4G36130	15.43	15.4	15.5	15.12	15.03	15.19	14.47	14.4	14.44	14.41	14.43	14.41
AT3G49430	16.07	15.97	16.04	15.68	15.75	15.69	15.62	15.57	15.62	15.43	15.39	15.46
AT5G10360	16.59	16.52	16.59	16.27	16.25	16.23	16.74	16.65	16.77	16.81	16.73	16.75
AT4G19150	14.57	14.6	14.58	14.23	14.33	14.24	15	15.06	15.12	14.84	14.92	14.85
AT1G66240	15.65	15.64	15.69	15.33	15.38	15.3	16.39	16.29	16.4	15.8	15.87	15.81
AT5G07980	15.74	15.71	15.68	15.4	15.38	15.38	15.66	15.65	15.62	15.47	15.45	15.53
AT5G04280	16.71	16.72	16.71	16.4	16.37	16.4	16.7	16.73	16.76	16.51	16.53	16.49
AT4G20830	16.51	16.52	16.48	16.19	16.15	16.21	16.76	16.73	16.76	16.3	16.31	16.29
AT2G37410	16.08	15.94	15.96	15.72	15.68	15.6	15.49	15.43	15.46	15.3	15.42	15.32
AT1G71950	17.38	17.29	17.29	17.01	17.01	16.98	16.62	16.53	16.64	16.61	16.57	16.51
AT1G05090	15.47	15.43	15.44	15.16	15.11	15.08	15.23	15.36	15.32	15.24	15.12	15.23
AT2G35410	16.69	16.65	16.67	16.36	16.39	16.31	16.23	16.2	16.21	15.96	16.03	15.98
AT2G40620	16.63	16.53	16.59	16.29	16.23	16.24	14.93	14.97	14.93	14.59	14.66	14.62
AT3G13990	15.48	15.45	15.47	15.1	15.18	15.16	16.01	15.97	16.05	15.85	15.92	15.89
AT5G24165	16.07	16.07	16.07	15.8	15.77	15.67	16.24	15.84	16.08	16.46	16.34	16.46
AT2G04520	16.95	16.85	16.89	16.55	16.64	16.54	16.87	16.78	16.81	16.78	16.87	16.83
AT4G11860	15.68	15.64	15.69	15.35	15.38	15.3	15.74	15.67	15.72	15.52	15.5	15.54
AT1G55260	16.47	16.19	16.6	16.13	16.16	16.03	17.6	17.53	17.7	17.38	17.46	17.36
AT1G62740	15.9	15.87	15.87	15.56	15.58	15.54	16.04	16.05	16.06	15.84	15.83	15.81
AT1G17440	15.54	15.46	15.49	15.08	15.27	15.18	15.46	15.29	15.43	15.18	15.22	15.18
AT5G51700	15.22	15.22	15.2	14.85	14.98	14.86	15.04	15.05	15.04	14.88	14.9	14.99
AT3G10650	16.12	16.08	16.12	15.81	15.75	15.8	16.1	16.07	16.12	15.95	15.91	15.91
AT5G10950	15.65	15.58	15.68	15.3	15.3	15.35	16.47	16.29	16.41	16.28	16.3	16.2
AT2G17870	15.88	15.81	15.9	15.56	15.59	15.49	16.02	16	16.05	15.78	15.83	15.71
AT5G18550	16.04	16.04	15.98	15.78	15.64	15.69	14.96	14.91	14.99	14.95	14.89	14.86
AT5G40490	17.51	17.48	17.53	17.17	17.23	17.17	16.9	16.88	16.9	16.71	16.68	16.72
AT1G52730	16.27	16.26	16.26	15.95	15.95	15.93	16.64	16.57	16.6	16.36	16.36	16.33
AT4G17520	16.78	16.73	16.78	16.45	16.48	16.39	16.87	16.84	16.88	16.71	16.72	16.69
AT1G16190	16.04	15.96	16.01	15.7	15.65	15.68	17.19	17.16	17.23	16.99	17.04	16.96
AT3G51730	16.9	16.81	16.88	16.58	16.6	16.46	14.34	14.41	14.48	14.1	13.97	13.98
AT3G12145	16.97	16.96	17.04	16.69	16.65	16.67	17.02	16.99	17.08	16.79	16.81	16.78
AT1G12050	16.23	16.14	16.2	15.89	15.91	15.83	17.09	17.02	17.16	16.86	16.9	16.88
AT1G13960	16.55	16.41	16.61	16.2	16.19	16.22	16.41	16.23	16.31	16.15	16.08	16.11
AT5G16390	17.49	17.43	17.46	17.17	17.18	17.06	17.12	17.07	17.12	17.15	17.14	17.1
AT1G50300	15.86	15.74	15.7	15.5	15.41	15.45	15.72	15.63	15.81	15.59	15.51	15.66
AT2G40610	15.46	15.46	15.54	15.1	15.19	15.24	17.32	17.2	17.35	16.83	16.75	16.87
AT4G32610	15.21	15.12	15.22	14.83	14.95	14.83	16.02	16.01	16.02	15.92	15.9	15.9
AT4G34110	17.07	16.92	17.02	16.7	16.69	16.65	17.27	17.18	17.23	16.94	16.97	16.89
AT3G19800	13.99	13.93	14.04	13.75	13.65	13.6	17.04	16.8	16.65	16.31	16.32	16.18
AT5G10940	14.85	14.99	14.93	14.58	14.68	14.58	15.23	15.22	15.25	14.95	14.97	14.87
AT2G26460	15.76	15.71	15.78	15.39	15.5	15.42	15.94	15.78	15.94	15.86	15.9	15.93
AT1G10350	15.45	15.41	15.47	15.11	15.21	15.07	14.48	14.76	14.54	14.58	14.62	14.6
AT4G37300	16.05	16	16	15.7	15.71	15.69	16.46	16.39	16.44	16.36	16.38	16.38
AT2G29960	16.96	16.89	16.86	16.51	16.7	16.56	17.6	17.59	17.63	17.32	17.27	17.19
AT1G32940	15.91	15.91	15.9	15.47	15.61	15.67	15.66	15.61	15.54	15.42	15.4	15.3
AT5G46750	15.94	15.98	15.9	15.63	15.58	15.66	16.35	16.39	16.43	16.24	16.28	16.18
AT3G54960	16.73	16.67	16.71	16.4	16.39	16.39	17	16.96	17.04	16.88	16.85	16.8
AT5G24760	15.41	15.27	15.27	15.01	15.04	14.95	14.58	14.63	14.66	14.37	14.52	14.67
AT5G13020	15.27	15.29	15.21	14.89	14.96	14.96	15.56	15.55	15.49	15.47	15.39	15.39
AT5G19110	16.57	16.59	16.61	16.3	16.18	16.35	17.12	17.15	17.12	16.95	16.92	16.97
AT3G19390	15.44	15.37	15.48	15.13	15.12	15.09	15.15	15.12	15.22	14.99	14.96	15
AT5G17510	15.99	15.95	16.07	15.67	15.61	15.77	16.14	16.16	16.25	16.07	16.06	16.05
AT5G62550	15.08	14.86	14.81	14.49	14.77	14.55	15.44	15.46	15.72	15.41	15.62	15.41
AT1G26630	16.49	16.48	16.53	16.2	16.17	16.2	16.6	16.57	16.61	16.43	16.35	16.36
AT1G02840	16.59	16.58	16.56	16.27	16.26	16.26	17.48	17.43	17.49	17.29	17.27	17.29
AT1G22690	18.66	18.63	18.72	18.39	18.44	18.25	16.25	16.31	16.18	16.35	16.27	16.37
AT3G25070	16.56	16.48	16.54	16.2	16.25	16.18	16.51	16.44	16.51	16.23	16.22	16.2
AT2G36950	16.39	16.35	16.35	16.07	16.12	15.97	17.52	17.45	17.54	17.15	17.13	17.18
AT1G32360	13.93	14.22	13.87	13.84	13.6	13.72	13.8	14.14	13.94	14.09	13.78	14
AT5G47480	15.32	15.3	15.34	14.99	14.98	15.02	15.36	15.41	15.39	15.33	15.3	15.4
AT4G32720	16.28	16.23	16.28	15.92	16	15.94	16.59	16.51	16.57	16.31	16.31	16.28
AT5G48030	16.04	15.98	16	15.65	15.73	15.7	17.18	17.15	17.23	17.03	17.06	17.02
AT1G75980	15.16	15.25	15.15	14.88	14.82	14.95	16.12	16.13	16.19	15.78	15.77	15.8
AT1G78150	17.15	17.08	17.07	16.82	16.81	16.74	16.81	16.7	16.78	16.6	16.64	16.61
AT4G36690	17.1	16.98	16.98	16.71	16.75	16.68	17	17	16.93	16.75	16.73	16.77
AT1G75510	16.54	16.66	16.51	16.31	16.24	16.25	17.33	17.22	17.46	17.37	17.34	17.2
AT5G54500	16.82	16.76	16.8	16.48	16.53	16.45	16.98	16.94	17	16.88	16.88	16.9
AT1G74670	15.86	15.79	15.82	15.49	15.5	15.55	14.92	14.84	14.88	14.81	14.85	14.8
AT5G27700	16.07	16.31	16.14	15.9	15.81	15.88	16.09	16.02	16.02	16	15.97	15.93
AT1G15340	16.48	16.42	16.49	16.16	16.19	16.12	16.45	16.38	16.45	16.22	16.23	16.17
AT5G22650	17.35	17.27	17.3	17.01	17.02	16.96	17.04	16.97	17.03	16.79	16.85	16.8
AT2G02790	16.34	16.35	16.4	16.05	16.1	16	16.48	16.45	16.5	16.41	16.34	16.34
AT3G10850	15.35	15.39	15.38	15.06	15.05	15.09	15.95	16	16.07	15.77	15.75	15.72
AT4G12610	15.96	15.93	15.88	15.63	15.57	15.62	16.5	16.49	16.48	16.4	16.34	16.4
AT5G18400	15.9	15.84	15.94	15.63	15.62	15.53	17.27	17.26	17.33	17.06	17.07	17.09
AT5G05100	13.79	13.8	13.68	13.51	13.38	13.42	15.03	15.04	15	14.91	14.87	14.96
AT5G52310	15.82	15.74	15.77	15.46	15.5	15.44	15.95	15.91	15.96	15.84	15.83	15.8
AT1G75560	15.81	15.89	15.81	15.5	15.59	15.49	16.04	15.93	16.08	15.95	16.03	15.94
AT3G53710	16.64	16.57	16.62	16.3	16.29	16.31	16.24	16.2	16.25	16.06	16.07	16.06
AT5G08520	15.48	15.51	15.53	15.29	15.07	15.23	16.04	16.1	16.2	15.71	15.66	15.69
AT3G06700	16.37	16.42	16.37	16.08	16.08	16.07	16.49	16.51	16.61	16.48	16.41	16.51
AT3G26400	15.65	15.67	15.62	15.31	15.35	15.35	16.81	16.77	16.83	16.64	16.65	16.58
AT5G51750	17.08	17.06	17.16	16.78	16.84	16.77	16.58	16.6	16.58	16.41	16.46	16.45
AT5G01210	14.69	14.74	14.55	14.31	14.36	14.4	16.19	16.23	16.25	16.04	15.98	16.06
AT3G07720	16.89	16.8	16.88	16.51	16.57	16.57	16.12	16.11	16.15	16.01	15.96	15.92
AT5G08380	16.27	16.18	16.22	15.93	15.94	15.91	16.75	16.73	16.8	16.29	16.3	16.3
AT5G64570	16.27	16.17	16.28	15.95	15.94	15.91	16.34	16.32	16.31	16.03	16.04	16.02
AT5G41050	16.47	16.42	16.43	16.13	16.17	16.11	17.32	17.23	17.31	17.14	17.11	17.04
AT3G16410	15.68	15.69	15.69	15.41	15.42	15.32	15.58	15.61	15.6	15.42	15.5	15.45
AT1G23260	15.41	15.35	15.61	15.2	15.06	15.22	15.84	15.67	15.91	15.65	15.71	15.71
AT2G35530	16.11	16.05	16.09	15.9	15.71	15.72	15.95	15.95	15.95	15.94	15.79	15.96
AT1G19880	16.39	16.29	16.38	16.02	16.12	16.02	15.96	15.88	15.93	15.78	15.77	15.8
AT3G47610	16.71	16.7	16.78	16.43	16.45	16.39	17.19	17.17	17.25	16.95	16.94	16.88
AT5G52200	16.44	16.41	16.36	16.14	16.03	16.12	16.36	16.34	16.37	16.29	16.3	16.24
AT1G23440	16.38	16.41	16.34	16.03	16.07	16.12	17.08	17.03	17.11	16.72	16.73	16.71
AT1G56340	17.11	17.04	17.07	16.76	16.8	16.75	17.18	17.13	17.17	17.05	17.05	17.01
AT3G16760	15.58	15.47	15.54	15.25	15.21	15.23	16.14	16.18	16.2	16.07	15.98	16.02
AT2G39140	16.4	16.43	16.48	16.1	16.19	16.12	16.93	16.84	16.92	16.9	16.97	16.86
AT1G21630	16.58	16.56	16.56	16.27	16.28	16.27	15.91	15.84	15.9	15.7	15.72	15.71
AT1G15810	15.46	15.5	15.52	15.21	15.18	15.18	16.35	16.24	16.32	16.11	16.08	16.13
AT2G33410	16.18	16.11	16.18	15.85	15.85	15.85	17.08	17.03	17.09	16.86	16.92	16.9
AT2G30050	17.01	16.95	17.01	16.68	16.7	16.67	16.85	16.82	16.84	16.59	16.58	16.6
AT4G24100	15.19	15.13	15.16	14.9	14.84	14.85	15.55	15.77	15.67	15.74	15.62	15.79
AT1G49400	16.75	16.73	16.69	16.45	16.42	16.39	17.28	17.12	17.25	16.99	17.09	16.85
AT1G77120	16.97	16.91	16.97	16.66	16.63	16.65	17.32	17.29	17.29	17.11	17.16	17.13
AT1G63220	13.39	13.64	13.41	13.21	13.17	13.16	15.68	15.79	15.65	15.29	15.35	15.44
AT4G39730	16.92	16.79	16.88	16.56	16.62	16.52	17.31	17.24	17.25	17.05	17.08	17.02
AT5G55180	15.58	15.65	15.65	15.24	15.34	15.41	14.3	14.29	14.28	13.91	13.95	13.72
AT5G61150	15.48	15.44	15.47	15.17	15.14	15.16	16.44	16.37	16.5	16.26	16.26	16.32
AT2G19385	15.18	15.13	15.15	14.87	14.85	14.84	15.68	15.67	15.66	15.72	15.73	15.72
AT1G12520	14.46	14.46	14.52	14.16	14.16	14.21	16.71	16.72	16.68	16.6	16.48	16.59
AT1G62380	15.73	15.75	15.76	15.43	15.45	15.44	16.43	16.36	16.42	16.13	16.2	16.14
AT5G60640	17.28	17.2	17.25	16.93	16.98	16.92	17.47	17.39	17.46	17.28	17.29	17.23
AT1G14170	16.43	16.7	16.73	16.32	16.24	16.42	16.43	16.34	16.44	16.27	16.21	16.24
AT2G02570	16.23	16.12	16.15	15.88	15.88	15.85	15.97	15.89	15.95	15.99	15.89	15.93
AT1G03530	14.91	14.94	14.94	14.69	14.57	14.65	16.1	16	16.02	15.82	15.83	15.89
AT4G21410	16.49	16.52	16.58	16.25	16.21	16.24	15.77	15.84	15.93	15.63	15.68	15.55
AT1G06460	16.54	16.52	16.57	16.26	16.25	16.24	16.45	16.45	16.48	16.21	16.26	16.2
AT5G08370	16.92	16.93	16.87	16.56	16.6	16.65	16.33	16.25	16.3	15.78	15.78	15.79
AT5G44720	16.76	16.73	16.77	16.46	16.45	16.45	16.46	16.45	16.49	16.14	16.18	16.09
AT5G08330	15.58	15.54	15.49	15.27	15.15	15.29	16.41	16.35	16.49	16.11	16.19	16.14
AT1G72680	16.36	16.41	16.43	16.08	16.13	16.12	16.7	16.63	16.67	16.51	16.54	16.59
AT3G62680	15.2	15.11	15.11	14.86	14.83	14.83	16.36	16.45	16.4	16.4	16.36	16.33
AT3G15810	15.53	15.43	15.47	15.22	15.19	15.13	16.64	16.63	16.7	16.28	16.41	16.38
AT1G76450	14.45	14.42	14.47	14.09	14.24	14.09	15.87	15.86	16.02	15.71	15.66	15.73
AT4G35830	16.13	16.06	16.09	15.8	15.82	15.76	16.49	16.44	16.48	16.27	16.29	16.27
AT3G44150	17.24	17.22	17.37	17.12	16.97	16.85	16.54	16.5	16.57	16.46	16.43	16.19
AT4G37870	16.46	16.39	16.42	16.14	16.12	16.12	16.4	16.41	16.41	16.22	16.23	16.19
AT4G25130	15.56	15.55	15.53	15.27	15.26	15.2	17.21	17.24	17.29	16.97	17.05	16.95
AT3G15640	14.7	14.56	14.55	14.35	14.23	14.34	15.88	15.93	15.9	15.86	16.01	15.89
AT4G11290	16.48	16.39	16.41	16.13	16.12	16.13	15.91	15.93	15.96	15.7	15.7	15.75
AT3G63030	13.97	14.13	13.99	13.77	13.63	13.78	15.06	15.13	15.11	15.24	15.09	15.17
AT1G72390	15.73	15.78	15.77	15.51	15.36	15.53	13.83	14.04	13.95	13.8	13.77	13.84
AT4G35630	16.67	16.64	16.66	16.4	16.36	16.33	16.9	16.78	16.84	16.61	16.65	16.58
AT2G27720	15.01	15.05	15.03	14.67	14.79	14.73	16.26	16.16	16.18	16.31	16.3	16.23
AT1G15780	15.08	15.19	15.11	14.88	14.76	14.86	14.68	14.68	14.72	14.46	14.4	14.5
AT5G19900	15.02	14.96	15.04	14.7	14.77	14.68	15.2	15.08	15.17	14.82	14.86	14.82
AT4G39100	16.13	16.29	16.1	15.9	15.74	16	16.53	16.46	16.58	16.34	16.38	16.33
AT1G01430	14.82	14.6	14.67	14.39	14.4	14.43	17	17.01	16.95	16.82	16.73	16.93
ATCG00750	16.81	16.92	16.79	16.6	16.51	16.52	17.39	17.44	17.35	17.33	17.39	17.32
AT4G10970	15.48	15.59	15.36	15.17	15.16	15.23	18.17	18.05	18.14	18.17	18.23	18.24
AT4G37210	15.74	15.65	15.71	15.45	15.4	15.35	16.3	16.23	16.35	16.1	16.12	16.11
AT2G37550	15.65	15.61	15.63	15.29	15.37	15.33	16.24	16.2	16.29	16.02	16.03	16.07
AT1G50920	15.42	15.45	15.46	15.17	15.15	15.14	15.53	15.62	15.58	15.62	15.59	15.62
AT2G20630	17.11	17.08	17.1	16.78	16.81	16.81	17.08	16.98	17.04	16.56	16.6	16.54
AT2G36880	17.24	17.22	17.26	16.97	16.96	16.9	16.96	16.89	16.98	16.7	16.73	16.7
AT1G52380	16.22	16.16	16.13	15.93	15.87	15.84	17.64	17.54	17.63	17.42	17.44	17.38
AT2G40060	16.61	16.54	16.57	16.28	16.29	16.25	16.87	16.77	16.87	16.56	16.61	16.57
AT1G70100	16.42	16.39	16.45	16.04	16.11	16.2	15.76	15.65	15.73	15.54	15.6	15.61
AT3G53970	16.12	16.14	16.14	15.83	15.91	15.76	15.77	15.8	15.83	15.55	15.57	15.53
AT3G46780	16.16	16.11	16.16	15.86	15.87	15.83	16.62	16.52	16.61	16.37	16.43	16.35
AT2G25670	16.9	16.81	16.83	16.55	16.55	16.56	16.16	16.11	16.13	16.02	16.08	16.02
AT5G15230	16.67	16.65	16.68	16.36	16.41	16.34	16.32	16.37	16.35	16.35	16.31	16.35
AT3G01540	16.33	16.24	16.25	15.98	15.95	16.02	15.46	15.4	15.46	15.31	15.26	15.36
AT1G71080	15.53	15.51	15.56	15.26	15.19	15.23	15.33	15.3	15.37	15.11	15.05	15.13
AT1G50570	16.79	16.83	16.75	16.47	16.51	16.5	16.3	16.29	16.37	16.02	16.09	16.06
AT1G75280	17.59	17.51	17.54	17.27	17.31	17.18	16.13	16.13	16.15	15.84	15.87	15.87
AT1G45130	15.53	15.53	15.49	15.25	15.25	15.11	15.83	15.87	15.9	15.53	15.54	15.5
AT5G06770	15.51	15.43	15.48	15.17	15.23	15.15	17.48	17.44	17.51	17.26	17.38	17.23
AT2G16365	15.2	15.19	15.21	14.89	14.93	14.92	14.92	14.93	14.92	14.59	14.61	14.63
AT5G05970	15.34	15.33	15.37	15.07	15.02	15.1	15.86	15.91	15.84	15.78	15.66	15.71
AT4G32330	15.9	15.91	15.92	15.64	15.63	15.59	16.4	16.35	16.4	16.19	16.2	16.15
AT2G33845	17.16	17.05	17.13	16.81	16.83	16.83	16.22	16.16	16.14	15.79	15.89	15.93
AT5G64816	15.85	15.99	15.9	15.6	15.65	15.68	17.06	17.14	17.13	17	16.94	17.01
AT3G08910	16.21	16.08	16.02	15.6	15.97	15.91	15.91	15.98	15.97	15.95	15.91	15.94
AT3G19130	15.15	15.15	15.07	14.8	14.89	14.81	15.25	15.24	15.32	15.14	15.13	15.1
AT1G51805	16.64	16.62	16.63	16.35	16.36	16.33	16.29	16.22	16.3	16.06	15.94	16.05
AT3G18230	16.28	16.36	16.31	16.03	16.05	16.03	15.34	15.38	15.35	15.26	15.2	15.36
AT4G02400	14.24	14.52	14.24	14.03	13.98	14.18	15.34	15.38	15.46	15.48	15.42	15.44
AT3G21770	15.89	15.85	15.83	15.62	15.58	15.52	15.9	15.93	15.97	15.69	15.67	15.62
AT3G45630	15.19	15.14	15.18	14.87	14.91	14.84	15.7	15.63	15.63	15.32	15.21	15.3
AT2G41060	14.37	14.45	14.28	14.14	14.08	14.03	15.66	15.63	15.61	15.59	15.56	15.51
AT5G61960	16.43	16.37	16.42	16.12	16.09	16.14	15.67	15.82	15.67	15.83	15.73	15.74
AT4G15545	16.44	16.46	16.37	16.15	16.09	16.18	16.84	16.77	16.78	16.65	16.72	16.7
AT5G15090	16.31	16.28	16.29	15.98	16.03	16	16.22	16.18	16.25	16.01	16.06	16.06
AT1G05590	14.82	14.9	14.88	14.66	14.54	14.52	14.91	15.05	15.08	14.93	14.85	15.01
AT3G14172	14.5	14.47	14.5	14.25	14.18	14.17	15.3	15.4	15.41	15.31	15.2	15.34
AT4G38980	14.56	14.78	14.48	14.34	14.05	14.61	15.75	15.63	15.51	15.24	15.15	15.25
AT2G14750	16.27	16.28	16.24	16.01	15.93	16	17.54	17.52	17.53	17.3	17.34	17.3
AT3G16810	15.72	15.7	15.73	15.48	15.39	15.43	14.94	14.93	15.07	14.91	14.91	14.8
AT3G62940	16.14	16.07	16.1	15.81	15.83	15.82	16.1	16	16.06	15.88	15.84	15.84
AT1G15280	15.93	15.89	15.95	15.63	15.63	15.62	15.65	15.61	15.74	15.53	15.52	15.49
AT3G49220	14.79	14.85	14.82	14.49	14.45	14.65	15.45	15.66	15.24	15.84	15.4	15.92
AT4G23860	15.5	15.47	15.47	15.21	15.19	15.18	15.52	15.54	15.58	15.26	15.24	15.27
AT1G74790	17.05	17.04	17.11	16.78	16.76	16.79	16.72	16.69	16.71	16.43	16.49	16.37
AT3G61820	16.34	16.35	16.36	16.05	16.05	16.09	16.63	16.58	16.67	16.39	16.38	16.39
AT2G43680	16.33	16.27	16.27	16.02	15.96	16.03	16.39	16.19	16.35	16.16	16.14	16.11
AT1G29400	16.1	16.04	16.12	15.84	15.71	15.85	16.73	16.81	16.77	16.53	16.55	16.52
AT4G22360	15.8	15.74	15.77	15.49	15.46	15.5	15.86	15.92	15.82	15.7	15.68	15.7
AT4G00300	14.49	14.45	14.48	14.18	14.12	14.26	15.86	15.84	15.88	15.54	15.65	15.72
AT5G63860	15.53	15.47	15.5	15.2	15.21	15.24	16.14	16.15	16.19	15.94	15.92	15.91
AT2G46740	16.79	16.79	16.87	16.57	16.46	16.58	15.58	15.64	15.66	15.57	15.49	15.54
AT5G64160	15.42	15.4	15.42	15.06	15.11	15.2	14.43	14.65	14.54	14.5	14.41	14.66
AT4G12080	15.5	15.5	15.48	15.23	15.18	15.23	16.39	16.38	16.49	16.26	16.11	16.08
AT3G56100	15.34	15.64	15.33	15.21	15.11	15.18	16.4	16.31	16.33	16.27	16.2	16.15
AT1G01440	15.25	15.43	15.18	15.07	14.89	15.03	15.29	15.41	15.28	15.24	15.19	15.37
AT2G43210	15.21	15.19	15.27	14.92	14.94	14.95	15.55	15.47	15.51	15.29	15.36	15.32
AT5G56600	15.44	15.41	15.43	15.18	15.13	15.1	17.22	17.15	17.15	16.9	16.82	16.66
AT5G03630	16.34	16.23	16.27	15.99	16.02	15.98	16.15	16.16	16.16	16.01	16.03	16.01
AT5G64670	16.04	15.94	15.9	15.63	15.73	15.68	15.51	15.69	15.53	15.77	15.79	15.77
AT3G26420	17.14	17.13	17.07	16.83	16.77	16.86	17.68	17.6	17.6	17.43	17.52	17.39
AT1G26110	17.18	17.13	17.23	16.92	16.91	16.87	17.62	17.54	17.6	17.43	17.47	17.39
AT1G33680	16.79	16.73	16.71	16.47	16.49	16.43	16.02	16.01	16	15.92	15.9	15.94
AT4G35050	15.52	15.49	15.5	15.28	15.26	15.12	15.49	15.53	15.5	15.33	15.41	15.5
AT2G17420	15.83	15.81	15.83	15.53	15.56	15.54	16.51	16.48	16.55	16.35	16.25	16.33
AT5G21105	16.52	16.57	16.53	16.24	16.24	16.3	16.8	16.77	16.76	16.41	16.36	16.45
AT5G19240	15.76	15.83	15.81	15.49	15.65	15.4	16.75	16.69	16.76	16.38	16.34	16.23
AT1G14650	16.07	16.08	16.09	15.79	15.77	15.8	15.88	15.9	15.95	15.79	15.81	15.82
AT3G13224	15.89	15.85	15.81	15.56	15.61	15.57	16.17	16.12	16.16	16.06	16.04	16.05
AT1G54410	16.72	16.6	16.64	16.41	16.43	16.27	17.61	17.49	17.66	17.27	17.31	17.21
AT4G00100	16.84	16.79	16.89	16.55	16.57	16.56	17.57	17.6	17.63	17.84	17.87	17.77
AT5G61820	16.74	16.76	16.78	16.55	16.41	16.47	16.38	16.43	16.45	16.29	16.29	16.32
AT5G41080	15.79	15.9	16.06	15.65	15.71	15.54	15.7	15.6	15.55	15.29	15.28	15.16
AT2G18510	16.96	16.91	16.9	16.6	16.66	16.67	16.12	16.1	16.09	15.89	15.98	15.93
AT1G09850	15.76	15.73	15.78	15.49	15.46	15.48	16.12	16.04	16.17	15.9	15.91	15.9
AT3G56240	16.11	16.14	16.11	15.85	15.84	15.83	16.78	16.77	16.79	16.39	16.42	16.35
AT4G38630	16.32	16.28	16.26	16.02	16.04	15.97	16.68	16.66	16.66	16.42	16.46	16.45
AT5G62630	16.1	16.02	16.08	15.77	15.81	15.77	15.44	15.39	15.41	15.09	15.17	15.19
AT3G48050	15.6	15.57	15.59	15.32	15.3	15.31	15.6	15.65	15.63	15.52	15.48	15.53
AT5G11260	16.47	16.43	16.4	16.03	16.26	16.13	16.47	16.41	16.37	16.15	16.11	16.15
AT3G49990	15.73	15.69	15.71	15.41	15.4	15.47	15.98	15.88	15.99	15.66	15.71	15.67
AT5G16260	16.76	16.82	16.84	16.53	16.54	16.51	16.22	16.21	16.15	16.13	16.12	16.16
AT5G47500	14.83	14.88	14.86	14.59	14.51	14.62	16.18	16.22	16.3	16.08	16.1	16.05
AT4G02560	15.16	15.04	15.2	14.75	14.89	14.91	14.6	14.59	14.59	14.54	14.61	14.61
AT1G78260	16.61	16.46	16.58	16.23	16.28	16.28	15.7	15.83	15.7	15.77	15.62	15.63
AT5G52240	16.9	16.9	16.91	16.59	16.72	16.59	16.91	16.84	16.93	16.92	16.96	16.92
AT4G08920	15.31	15.3	15.37	15.08	15.02	15.02	15.42	15.53	15.46	15.27	15.28	15.3
AT1G09780	17.31	17.22	17.25	16.96	17.01	16.97	17.14	17.08	17.13	16.94	16.96	16.9
AT3G56310	16.2	16.17	16.22	15.94	15.95	15.9	17.28	17.29	17.23	17.15	17.13	17.09
AT1G27430	15.18	15.16	15.13	14.9	14.83	14.92	15.68	15.69	15.67	15.52	15.48	15.6
AT5G15270	16.6	16.57	16.63	16.31	16.32	16.33	16.63	16.61	16.67	16.39	16.39	16.45
AT2G28790	16.86	16.9	16.89	16.57	16.6	16.63	17.07	17.11	17.11	16.84	16.86	16.98
AT1G67630	16.03	16.02	16.02	15.77	15.75	15.71	15.73	15.79	15.8	15.72	15.7	15.77
AT3G15690	15.97	15.82	15.95	15.6	15.71	15.62	15.21	14.98	15.37	15.06	15.13	15.21
AT1G66260	16.33	16.25	16.36	16.04	16.02	16.04	16.02	16.01	16.06	15.95	15.97	16.03
AT4G25820	16.76	16.76	16.72	16.5	16.38	16.54	16.94	16.83	16.8	16.58	16.54	16.51
AT4G11600	16.79	16.76	16.77	16.47	16.52	16.52	17.48	17.36	17.41	16.92	16.95	16.87
AT3G28480	15.16	15.07	15.07	14.82	14.88	14.79	16.93	16.78	16.82	16.6	16.62	16.57
AT1G12270	15.99	15.93	16	15.68	15.68	15.72	16.79	16.82	16.84	16.59	16.6	16.58
AT3G23830	16.29	16.24	16.39	16	16.03	16.06	16.1	16.11	16.17	15.98	15.8	16.09
AT1G27100	15.24	15.43	15.26	15.11	14.87	15.11	14.88	15.02	14.84	14.8	14.79	14.76
AT3G58550	16.45	16.39	16.48	16.1	16.26	16.15	17.34	17.31	17.44	17.13	17.25	17.12
AT5G58710	16.43	16.41	16.48	16.21	16.16	16.13	17.49	17.4	17.45	17.32	17.34	17.2
AT5G51840	16.21	16.28	16.18	15.97	15.94	15.95	16.94	16.94	16.99	16.96	17	16.93
AT3G04500	15.44	15.47	15.45	15.22	15.16	15.17	17.19	17.13	17.12	16.89	16.86	16.98
AT2G41630	16.53	16.52	16.55	16.24	16.3	16.23	16.42	16.32	16.3	16.11	16.15	16.06
AT1G18980	17.16	16.92	17.08	16.81	16.84	16.69	15.32	15.5	15.54	15.21	15.28	15.25
AT3G21215	15.67	15.77	15.71	15.47	15.41	15.44	16.47	16.5	16.45	16.49	16.54	16.49
AT5G55670	15.79	15.87	15.84	15.58	15.46	15.63	15.77	15.71	15.76	15.56	15.57	15.54
AT1G67325	16.01	15.9	16.01	15.67	15.75	15.69	16.34	16.26	16.4	16.26	16.28	16.11
AT3G02180	14.64	14.65	14.59	14.17	14.37	14.51	17.19	17.48	17.4	17.28	17.11	17.32
AT4G16580	14.66	14.69	14.61	14.41	14.4	14.35	15.6	15.44	15.55	15.29	15.32	15.33
AT4G20860	15.75	15.76	15.77	15.48	15.45	15.52	16.15	16.1	16.13	15.75	15.75	15.77
AT5G01300	14.68	14.87	14.88	14.51	14.66	14.49	16.67	16.62	16.64	16.89	16.91	16.89
AT4G01850	15.84	15.82	15.8	15.53	15.58	15.54	16.39	16.42	16.45	16.19	16.19	16.22
AT3G13060	15.76	15.73	15.7	15.48	15.4	15.44	15.98	15.94	16	15.78	15.84	15.85
AT5G25090	17.23	17.21	17.28	16.92	17	16.93	17.6	17.61	17.58	17.26	17.26	17.29
AT3G15970	16.09	16.1	16.11	15.85	15.82	15.8	16.14	16.13	16.16	15.9	15.91	15.91
AT4G39880	18.07	17.96	18	17.79	17.74	17.69	17.34	17.47	17.63	17.15	17.22	17.03
AT4G26970	16.19	16.19	16.2	15.91	15.93	15.92	16.3	16.29	16.31	16.11	16.11	16.09
AT3G52370	15.48	15.33	15.19	15.11	15.01	15.09	16.58	16.59	16.59	16.22	16.29	16.14
AT4G10730	15.53	15.39	15.46	15.08	15.28	15.19	15.29	15.24	15.24	15.21	14.97	15.09
AT4G28440	15.75	15.62	15.66	15.36	15.46	15.39	15.33	15.41	15.34	15.31	15.19	15.27
AT3G52230	15.36	15.21	15.24	14.98	15.05	14.97	15.75	15.8	15.78	16.01	15.94	16.02
AT3G10070	16.31	16.3	16.18	15.95	16.07	15.95	15.38	15.2	15.23	15.1	15.08	15.1
AT5G48380	16.05	15.99	16.02	15.79	15.65	15.8	16.47	16.73	16.5	16.53	16.35	16.56
AT1G59610	15.95	15.9	15.91	15.65	15.65	15.64	16.2	16.11	16.17	16.04	15.98	16
AT1G32730	16.17	16.22	16.23	15.96	15.92	15.94	16.08	16.19	16.08	16.12	16.09	16.13
AT5G53440	16.76	16.82	16.77	16.46	16.53	16.52	16.44	16.46	16.44	16.15	16.12	16.2
AT4G38900	15.1	15.14	15.16	14.86	14.83	14.9	15.55	15.6	15.61	15.28	15.38	15.42
AT2G21130	17.24	17.16	17.13	16.87	16.92	16.93	16.86	16.77	16.77	16.59	16.53	16.47
AT4G34030	16.37	16.3	16.33	16.05	16.06	16.06	16.67	16.63	16.73	16.53	16.52	16.48
AT1G63480	16.54	16.53	16.64	16.25	16.39	16.25	15.83	15.72	15.9	15.57	15.71	15.71
AT1G17160	16.94	16.9	16.95	16.68	16.68	16.61	17.63	17.62	17.67	17.35	17.38	17.31
AT5G20250	17.05	16.98	17.04	16.75	16.78	16.74	16.27	16.2	16.29	16.18	16.15	16.15
AT1G47490	14.9	14.96	15.09	14.73	14.71	14.7	15.65	15.61	15.64	15.56	15.39	15.47
AT1G76940	15.5	15.46	15.59	15.29	15.19	15.26	15.18	15.14	15.19	15.01	14.98	14.93
AT3G09840	15.4	15.45	15.42	15.12	15.15	15.18	16	16.03	16.02	15.94	15.96	15.98
AT1G31930	13.18	13.24	13.49	13.12	13.02	12.95	15.33	15.43	15.42	15.2	15.33	15.23
AT5G20200	16.02	15.94	15.96	15.71	15.68	15.7	15.71	15.67	15.76	15.62	15.61	15.61
AT4G26110	15.91	15.98	15.96	15.7	15.66	15.69	16.51	16.49	16.49	16.11	16.16	16.09
AT5G43330	16.73	16.7	16.79	16.5	16.45	16.47	16.73	16.65	16.66	16.43	16.46	16.37
AT2G34310	16.15	16.07	16.13	15.85	15.86	15.83	15.88	15.85	15.86	15.71	15.75	15.68
AT2G33530	16.61	16.5	16.55	16.41	16.26	16.17	15	15.02	14.97	14.73	14.77	14.87
AT4G21660	16.52	16.48	16.47	16.23	16.21	16.22	15.94	15.96	15.99	15.8	15.85	15.76
AT2G35490	17.36	17.27	17.35	17.03	17.13	16.99	17.32	17.29	17.32	17.13	17.14	17.09
AT1G58100	15.5	15.6	15.53	15.22	15.24	15.34	14.93	15.02	14.97	14.82	14.77	14.81
AT3G48740	16.93	16.82	16.78	16.56	16.55	16.64	16.23	16.3	16.18	16.19	16.03	16.13
AT4G04210	16.07	16.05	16.13	15.81	15.85	15.77	15.64	15.66	15.62	15.53	15.46	15.55
AT1G31817	15.63	15.67	15.67	15.39	15.37	15.37	15.66	15.63	15.66	15.43	15.48	15.49
AT4G32420	16.79	16.79	16.77	16.47	16.58	16.49	16.33	16.21	16.39	16.09	16.09	16.04
AT2G46630	16.04	15.89	15.94	15.72	15.67	15.66	15.84	15.76	15.86	15.62	15.59	15.62
AT2G25980	15.1	15.15	15.12	14.87	14.85	14.86	15.9	15.85	15.88	15.69	15.71	15.65
AT3G02220	16.24	16.18	16.13	15.98	15.87	15.88	16.27	16.15	16.29	16.05	15.98	16.06
AT5G67400	16.27	16.31	16.25	16.03	15.99	16	16.71	16.78	16.78	16.53	16.45	16.64
AT3G18640	14.84	14.74	14.74	14.53	14.49	14.52	15.83	15.78	15.84	15.73	15.73	15.73
AT5G55810	15.51	15.63	15.5	15.26	15.18	15.4	15.84	15.83	15.75	15.51	15.56	15.75
AT5G58040	16.49	16.44	16.51	16.22	16.21	16.2	16.27	16.25	16.33	16.1	16.12	16.09
AT3G10050	16.18	16.23	16.22	15.93	15.97	15.95	15.84	15.84	15.87	15.66	15.68	15.71
AT3G52850	17.12	17.13	17.15	16.86	16.86	16.87	15.98	16.08	16.07	15.76	15.76	15.76
AT5G22480	15.41	15.39	15.36	15.15	15.1	15.11	14.88	14.94	14.92	14.79	14.71	14.83
AT5G48580	17.86	17.72	17.82	17.56	17.57	17.48	18.01	17.98	18.03	17.92	17.88	17.78
AT5G27850	15.87	15.87	15.84	15.6	15.62	15.59	16.66	16.65	16.65	16.76	16.8	16.73
AT5G55280	16.37	16.28	16.3	16.07	16.1	15.98	16.25	16.21	16.24	16.03	16.04	16.03
AT1G47420	15.26	15.2	15.21	14.96	14.99	14.91	15.91	15.83	15.92	15.8	15.85	15.78
AT1G22450	15.77	15.79	15.71	15.53	15.43	15.53	16.4	16.39	16.36	16.34	16.35	16.33
AT2G16005	16	16.03	16.06	15.79	15.72	15.76	16.64	16.69	16.62	16.63	16.67	16.64
AT1G33600	17.82	17.8	17.83	17.6	17.6	17.44	18.06	17.97	18.07	17.69	17.78	17.71
AT2G24590	16.64	16.58	16.68	16.36	16.46	16.28	16.54	16.69	16.66	16.22	16.31	16.38
AT2G18020	15.22	15.24	15.14	14.95	14.9	14.93	16.12	16.07	16.09	16	16.03	16.02
AT4G01290	16.04	16.01	16.02	15.75	15.77	15.75	16.46	16.49	16.46	16.33	16.28	16.32
AT1G78820	16.23	16.24	16.18	15.95	15.89	15.97	16.35	16.32	16.36	16.06	16.05	16.08
AT1G79830	15.88	15.87	15.85	15.61	15.57	15.63	15.8	15.81	15.82	15.64	15.67	15.69
AT3G45050	15.98	16	15.99	15.76	15.74	15.68	16.72	16.6	16.7	16.5	16.52	16.43
AT4G02450	17.15	17.03	17.1	16.85	16.88	16.76	17.12	17.08	17.16	16.94	16.93	16.89
AT1G70650	15.84	15.84	15.85	15.67	15.55	15.53	16.82	16.77	16.82	16.41	16.39	16.44
AT3G14890	15.61	15.58	15.61	15.31	15.37	15.34	16.53	16.5	16.48	16.43	16.42	16.39
AT3G55340	15.25	15.24	15.28	15.03	14.96	15	16.3	16.34	16.38	16.19	16.25	16.34
AT5G23400	16.5	16.42	16.49	16.2	16.23	16.19	16.85	16.84	16.79	16.71	16.69	16.75
AT5G20990	16.42	16.32	16.36	16.11	16.13	16.09	16.96	16.95	16.99	16.86	16.88	16.84
AT2G17630	16.14	16.05	16.13	15.79	15.88	15.87	17.04	16.99	17	16.82	16.84	16.83
AT3G48930	16.7	16.75	16.75	16.49	16.49	16.42	17.58	17.47	17.58	17.59	17.72	17.58
AT2G48160	14.65	14.94	14.62	14.51	14.35	14.58	16.47	16.38	16.41	16.12	16.17	16.05
AT2G25970	15.88	15.86	15.86	15.6	15.6	15.6	15.88	15.86	15.84	15.75	15.74	15.75
AT3G01340	16.94	16.94	16.92	16.66	16.72	16.62	16.67	16.62	16.68	16.47	16.43	16.41
AT3G48690	15.96	15.88	15.96	15.64	15.67	15.71	17.03	16.93	16.94	16.8	16.79	16.75
AT1G13190	16.3	16.36	16.29	16.12	16.02	16.03	16.29	16.21	16.28	16.02	16.06	16.18
AT4G13660	15.89	15.95	15.86	15.56	15.65	15.7	15.17	15.07	15.17	14.88	14.8	14.8
AT1G07040	15.5	15.6	15.62	15.32	15.31	15.28	15.11	15.1	15.09	14.97	14.97	15.03
AT3G15790	16	15.86	15.87	15.66	15.63	15.66	16.45	16.46	16.47	16.27	16.37	16.29
AT3G03630	15.16	15.14	15.16	14.9	14.87	14.9	16.14	16.17	16.1	16.06	16.14	16.09
AT1G19860	16.01	15.94	15.92	15.69	15.7	15.7	16.32	16.45	16.45	16.19	16.13	16.3
AT1G24300	15.74	15.72	15.71	15.42	15.44	15.5	15.77	15.76	15.77	15.59	15.58	15.66
AT1G55310	14.59	14.58	14.54	14.33	14.35	14.25	15.24	15.12	15.18	14.99	15.06	14.97
AT1G47260	16.88	16.85	16.85	16.61	16.61	16.59	16.28	16.3	16.33	16.15	16.12	16.15
AT3G04000	16.12	16.14	16.11	15.91	15.87	15.81	16.44	16.5	16.49	16.26	16.24	16.23
AT5G44130	16.42	16.39	16.43	16.15	16.24	16.07	17.55	17.52	17.54	17.16	17.17	17.07
AT1G73620	16.79	16.79	16.74	16.53	16.46	16.54	16.73	16.69	16.7	16.49	16.38	16.46
AT4G39330	16.43	16.44	16.43	16.17	16.18	16.18	17.09	17.05	17.06	16.91	16.91	16.91
AT4G00830	16.52	16.48	16.51	16.28	16.22	16.21	16.4	16.45	16.43	16.22	16.21	16.25
AT1G11330	15.65	15.51	15.35	15.37	15.19	15.18	16.56	16.63	16.61	16.54	16.44	16.58
AT1G14950	16.77	16.75	16.73	16.5	16.49	16.47	16.33	16.24	16.31	16.33	16.34	16.25
AT5G64350	16.02	15.95	15.97	15.7	15.74	15.72	15.94	15.85	15.94	15.58	15.73	15.51
AT3G09925	16.12	16.05	16.12	15.84	15.84	15.83	14.29	14.46	14.48	14.35	14.46	14.39
AT1G47480	14.82	14.87	14.71	14.48	14.5	14.65	14	14.06	14	14.09	14.02	14.17
AT1G66970	16.17	16.23	16.16	15.96	15.93	15.89	16.53	16.5	16.47	16.21	16.21	16.14
AT3G53500	18.1	18.01	18.09	17.81	17.89	17.73	15.05	15.06	15.15	14.83	14.9	14.82
AT1G09740	16.87	16.82	16.84	16.61	16.54	16.59	16.62	16.55	16.71	16.26	16.48	16.27
AT3G62800	15.32	15.34	15.32	15.12	14.99	15.08	16.98	16.96	16.95	16.83	16.76	16.95
AT1G01300	15.68	15.67	15.66	15.36	15.46	15.4	16.43	16.31	16.39	16.25	16.29	16.23
AT5G54080	16.46	16.45	16.45	16.25	16.22	16.12	15.17	15.29	15.22	15.15	15.15	15.11
AT5G13480	16.61	16.65	16.72	16.47	16.46	16.29	15.59	15.54	15.64	15.39	15.41	15.47
AT3G52720	17.53	17.48	17.44	17.21	17.19	17.29	16.96	16.97	16.89	16.8	16.68	16.76
AT1G63000	16.84	16.76	16.8	16.58	16.56	16.49	16.74	16.67	16.74	16.44	16.48	16.4
AT1G02170	13.91	13.77	13.88	13.61	13.56	13.6	15.36	15.31	15.43	15.42	15.34	15.32
AT2G30105	15.05	15.08	15.04	14.82	14.78	14.8	16.48	16.48	16.51	16.23	16.28	16.31
AT5G63620	15.86	15.8	15.85	15.58	15.58	15.54	16.97	16.94	16.93	16.72	16.7	16.75
AT2G24200	16.32	16.27	16.31	16.05	16.05	16.02	16.02	15.98	16.08	15.8	15.77	15.78
AT5G06860	16.67	16.67	16.6	16.41	16.3	16.44	17.15	17.08	17.22	16.83	16.84	16.76
AT2G19750	18.61	18.59	18.68	18.34	18.37	18.39	20.34	20.36	20.37	20.45	20.46	20.43
AT5G24520	15.76	15.81	15.86	15.63	15.5	15.53	16.36	16.39	16.41	16.29	16.33	16.45
AT1G18210	16.18	16.2	16.13	15.9	15.98	15.85	16.25	16.29	16.28	16.07	16.05	16.07
AT1G53580	16.32	16.33	16.34	16.08	16.05	16.08	17.17	17.25	17.21	17.14	17.06	17.14
AT1G17360	15.67	15.68	15.55	15.41	15.39	15.33	15.15	15.18	15.09	15.03	15.02	15.09
AT3G57550	16	15.97	16.01	15.66	15.82	15.73	16.12	16.17	16.16	15.94	15.93	15.97
AT3G02900	15.25	15.23	15.33	14.92	15.18	14.93	16.04	16.29	16.14	16.19	16.11	16.3
AT2G17410	15.77	15.76	15.8	15.52	15.53	15.51	15.76	15.73	15.8	15.63	15.64	15.62
AT5G16450	18.55	18.49	18.46	18.26	18.28	18.2	18.59	18.56	18.56	18.34	18.33	18.37
AT5G64390	14.46	14.41	14.44	14.14	14.11	14.29	15.26	15.2	15.2	15.06	15.02	15.23
AT1G30910	15.78	15.72	15.7	15.47	15.55	15.43	15.8	15.77	15.77	15.74	15.7	15.79
AT3G54420	14.98	14.98	14.81	14.69	14.68	14.68	15.05	15.47	15.15	14.67	14.39	14.86
AT1G79570	15.97	15.88	15.97	15.7	15.68	15.7	15.61	15.62	15.66	15.5	15.46	15.55
AT4G22490	17.52	17.51	17.4	17.26	17.24	17.17	17.92	17.91	17.8	17.52	17.45	17.51
AT1G51690	16.79	16.72	16.79	16.52	16.57	16.46	16.47	16.33	16.36	16.28	16.24	16.24
AT1G79930	15.61	15.56	15.59	15.28	15.37	15.34	15.31	15.32	15.33	15.25	15.2	15.22
AT4G33740	16.44	16.3	16.39	16.07	16.16	16.12	15.68	15.67	15.77	15.5	15.53	15.49
AT3G53460	16.9	16.85	16.87	16.6	16.65	16.62	16.55	16.56	16.58	16.42	16.42	16.45
AT3G59980	16.59	16.55	16.59	16.33	16.38	16.25	17.24	17.11	17.23	17.02	17.02	16.99
AT2G23760	15.19	15.16	15.09	14.88	14.87	14.94	14.69	14.65	14.61	14.55	14.55	14.58
AT1G20760	16.57	16.54	16.52	16.29	16.3	16.28	16.34	16.38	16.43	16.22	16.2	16.19
AT1G07750	16.5	16.57	16.5	16.3	16.22	16.31	14.85	14.89	14.88	14.84	14.85	14.85
AT5G28750	14.59	14.47	14.54	14.26	14.33	14.25	15.21	15.13	15.17	15.01	15.08	14.99
AT2G44730	16.24	16.22	16.16	15.97	16	15.89	15.81	15.83	15.86	15.67	15.8	15.78
AT5G19770	15.27	15.17	15.21	14.89	14.93	15.08	15.34	15.28	15.44	15.22	15.23	15.32
AT1G58370	15.54	15.72	15.49	15.24	15.35	15.4	14.52	14.85	14.79	14.68	14.41	14.79
AT4G26010	16.77	16.71	16.72	16.46	16.47	16.5	16.62	16.6	16.67	16.37	16.36	16.35
AT2G29190	16.3	16.24	16.37	16.1	16.1	15.92	17.4	17.25	17.43	17.08	17.04	17.16
AT1G17210	15.85	15.86	15.77	15.58	15.52	15.6	16.11	16.09	16.11	15.89	15.86	15.89
AT5G52380	15.44	15.43	15.42	15.17	15.1	15.27	15.14	14.97	15.05	14.87	14.96	14.99
AT5G56290	15.2	15.27	15.29	15.04	14.94	15.01	16.23	16.19	16.25	16.22	16.16	16.2
AT4G37910	15.92	15.9	15.93	15.69	15.65	15.66	15.95	15.92	15.93	15.77	15.79	15.75
AT3G01280	16.78	16.68	16.69	16.44	16.5	16.46	16.28	16.17	16.19	16.06	16.02	16
AT5G34940	15.95	15.97	15.95	15.75	15.7	15.68	16.57	16.52	16.58	16.28	16.27	16.38
AT1G20190	15.85	15.79	15.74	15.57	15.53	15.51	16.65	16.67	16.64	16.57	16.52	16.55
AT5G61170	16	16.05	16.06	15.74	15.79	15.82	16.21	16.18	16.2	16.26	16.23	16.2
AT1G12830	15.32	15.3	15.33	15.05	15.14	15.03	15.75	15.66	15.66	15.6	15.57	15.44
AT4G04800	15.4	15.36	15.45	15.17	15.13	15.16	15.93	15.84	15.77	15.54	15.67	15.51
AT5G51970	16.13	16.13	16.17	15.89	15.89	15.91	16.66	16.6	16.69	16.38	16.4	16.43
AT2G47140	16.23	16.18	16.12	15.93	15.83	16.01	16.84	16.84	16.9	16.8	16.9	16.81
AT5G59090	16.86	16.78	16.83	16.57	16.58	16.57	16.78	16.74	16.83	16.63	16.6	16.59
AT5G17820	16.67	16.62	16.65	16.39	16.4	16.4	16.47	16.41	16.48	16.23	16.22	16.16
AT5G61510	16.16	16.17	16.12	15.86	15.91	15.92	15.46	15.45	15.45	15.32	15.26	15.34
AT5G08270	15.48	15.49	15.48	15.22	15.21	15.27	15.95	15.91	15.96	15.78	15.78	15.81
AT4G19810	16.61	16.65	16.68	16.42	16.41	16.36	16.56	16.52	16.56	16.42	16.33	16.36
AT5G50870	16.08	16.09	16.07	15.84	15.81	15.85	15.49	15.44	15.55	15.57	15.52	15.54
AT5G04430	16.42	16.38	16.45	16.14	16.21	16.14	16.57	16.53	16.56	16.35	16.37	16.34
AT5G42720	16.73	16.87	16.85	16.54	16.57	16.61	17.22	17.19	17.21	16.88	16.82	16.83
AT2G33050	15.24	15.27	15.25	15.06	14.96	15	15.21	15.18	15.22	15.06	14.92	15.05
AT5G53140	16.6	16.57	16.6	16.31	16.38	16.33	16.76	16.72	16.74	16.52	16.51	16.5
AT4G34180	16.68	16.57	16.7	16.41	16.39	16.4	16.89	16.81	16.88	16.49	16.52	16.46
AT4G35890	16.06	16.03	16.1	15.8	15.83	15.82	16.04	16.09	16.11	16.01	16.03	16.01
AT1G13950	16.93	17.15	17.03	16.74	16.82	16.8	16.29	16.26	16.28	15.99	15.97	15.96
AT4G21450	15.59	15.55	15.62	15.3	15.33	15.39	15.64	15.69	15.62	15.55	15.56	15.52
AT5G07020	16.45	16.36	16.39	16.13	16.16	16.19	16.21	16.2	16.17	16	15.98	15.98
AT2G26080	15.74	15.74	15.77	15.48	15.52	15.48	15.96	15.94	15.99	15.79	15.77	15.79
AT4G38400	15.23	15.23	15.24	14.96	14.91	15.08	16.13	16.09	16.11	15.89	15.83	15.89
AT1G74230	14.88	14.95	14.87	14.78	14.64	14.54	14.5	14.55	14.6	14.41	14.41	14.45
AT5G62440	16	16.17	15.99	15.81	15.79	15.84	15.28	15.38	15.31	15.82	15.62	15.69
AT4G04570	16.07	16.82	16.11	16	16.01	16.31	14.07	14.29	14.2	14.13	14.11	14.12
AT2G38440	14.09	14.2	14.27	14.01	13.84	13.96	15.04	15.1	15.08	14.98	15.03	15.13
AT3G12130	16.16	16.19	16.23	15.9	16.01	15.94	15.86	15.9	15.93	15.65	15.69	15.6
AT1G29220	14.73	14.68	14.66	14.47	14.46	14.4	14.24	14.37	14.25	14.14	14.13	14.32
AT5G53400	16.04	16.01	16.08	15.81	15.77	15.82	16.24	16.27	16.26	16.23	16.19	16.22
AT3G06820	14.43	14.43	14.32	14.17	14	14.26	14.57	14.59	14.69	14.75	14.69	14.73
AT4G28750	13.59	13.52	13.57	13.28	13.34	13.31	14.56	14.47	14.59	14.41	14.43	14.37
AT4G15530	15.75	15.71	15.72	15.48	15.45	15.49	16.36	16.35	16.37	16.23	16.22	16.27
AT4G11560	15.71	15.65	15.71	15.44	15.42	15.46	15.74	15.72	15.79	15.6	15.57	15.63
AT3G05420	16.42	16.38	16.43	16.16	16.19	16.15	16.5	16.45	16.46	16.32	16.31	16.26
AT2G07715	16.49	16.52	16.52	16.25	16.26	16.31	15.16	15.3	15.25	15.33	15.34	15.28
AT1G30480	15.59	15.56	15.62	15.32	15.35	15.35	16.07	16.01	16.08	15.89	15.88	15.86
AT2G19570	16.82	16.8	16.81	16.58	16.53	16.58	17.14	17.06	17.09	16.93	16.85	16.93
AT4G11740	15.78	15.84	15.87	15.57	15.56	15.62	16.32	16.29	16.35	16.14	16.15	16.14
AT5G03040	14.93	14.91	14.95	14.68	14.66	14.72	15.61	15.57	15.61	15.63	15.61	15.58
AT1G03630	15.79	15.73	15.77	15.51	15.54	15.51	16.27	16.19	16.27	16.06	16.07	16.04
AT3G11400	16.45	16.4	16.41	16.13	16.19	16.2	15.98	15.85	15.96	15.68	15.66	15.59
AT1G11930	16.18	16.08	16.12	15.88	15.89	15.88	16.51	16.47	16.53	16.17	16.22	16.2
AT5G63260	15.11	15.09	15.07	14.84	14.83	14.85	15.69	15.82	15.74	15.54	15.54	15.49
AT5G64030	16	15.98	15.96	15.72	15.74	15.75	16.31	16.27	16.3	16.16	16.2	16.17
AT5G16040	15.86	15.92	15.85	15.66	15.64	15.63	15.48	15.45	15.5	15.4	15.37	15.45
AT3G19950	14.43	14.37	14.37	14.08	14.16	14.18	15.16	15.17	15.16	14.98	14.87	15
AT2G18110	15.97	15.99	16.08	15.76	15.79	15.75	15.58	15.54	15.58	15.36	15.45	15.38
AT5G42220	16.62	16.57	16.56	16.38	16.34	16.31	15.56	15.54	15.58	15.42	15.45	15.42
AT2G38730	16.34	16.27	16.43	16.1	16.12	16.1	17.32	17.19	17.25	17.01	17.02	16.98
AT4G20110	15.94	15.89	15.89	15.65	15.66	15.7	15.78	15.68	15.7	15.5	15.56	15.54
AT1G20670	16.54	16.52	16.53	16.27	16.26	16.31	15.02	15.01	15.09	14.93	14.97	14.94
AT5G65730	16.42	16.45	16.41	16.1	16.2	16.23	16.71	16.7	16.86	16.58	16.41	16.51
AT1G07210	15.38	15.42	15.43	15.15	15.18	15.18	15.04	14.99	15.08	15.06	15.06	15.12
AT4G31870	15.53	15.41	15.53	15.19	15.3	15.25	16.38	16.38	16.38	16.24	16.21	16.27
AT5G40650	16.78	16.72	16.76	16.49	16.52	16.52	17.71	17.59	17.68	17.43	17.44	17.28
AT5G47490	15.79	15.8	15.76	15.55	15.51	15.57	15.58	15.57	15.66	15.57	15.46	15.47
ATCG00790	17.34	17.36	17.41	17.14	17.2	17.04	17.39	17.31	17.4	17.32	17.35	17.34
AT5G13310	14.68	14.74	14.67	14.44	14.45	14.44	15.68	15.73	15.74	15.54	15.5	15.63
AT2G40780	14.91	14.89	14.96	14.69	14.64	14.7	13.62	13.62	13.43	13.04	13	13.2
AT2G26280	16.42	16.36	16.36	16.15	16.18	16.1	16.29	16.32	16.33	16.26	16.23	16.24
AT5G49910	16.68	16.63	16.67	16.43	16.43	16.39	16.22	16.18	16.19	15.97	16	15.97
AT4G35460	16.21	16.26	16.24	16.03	16.01	15.95	16.26	16.34	16.34	16.33	16.23	16.22
AT5G58190	14.65	14.57	14.57	14.38	14.32	14.33	15.53	15.64	15.59	15.42	15.39	15.48
AT1G56000	17.51	17.52	17.44	17.24	17.22	17.29	17.42	17.46	17.34	17.4	17.26	17.38
AT1G65870	17.02	16.99	17.02	16.78	16.78	16.76	15.36	15.33	15.37	15.21	15.17	15.12
AT1G36370	16.55	16.61	16.65	16.4	16.33	16.35	14.73	14.89	14.79	14.62	14.61	14.71
AT1G06190	16.72	16.63	16.73	16.43	16.48	16.44	16.16	16.07	16.16	15.99	16	15.97
AT3G15020	16.7	16.45	16.72	16.24	16.43	16.47	15.74	15.74	15.83	15.64	15.69	15.52
AT1G48110	16.33	16.28	16.26	16.07	16.06	16.02	15.58	15.58	15.6	15.47	15.45	15.43
AT3G20500	16.87	16.86	16.77	16.51	16.7	16.57	17.04	17.01	17.04	16.65	16.76	16.59
AT4G34980	16.27	16.23	16.2	15.99	15.99	15.97	16.41	16.43	16.43	16.29	16.21	16.23
AT3G06850	17.48	17.38	17.45	17.17	17.21	17.18	15.83	15.78	15.76	15.53	15.48	15.49
AT3G27925	16.87	16.78	16.86	16.57	16.6	16.61	16.83	16.77	16.85	16.63	16.63	16.57
AT4G23040	16.49	16.36	16.48	16.25	16.24	16.13	15.46	15.37	15.37	15.14	15.22	15.19
AT1G72880	15.64	15.63	15.6	15.38	15.35	15.4	16.31	16.26	16.35	16.19	16.14	16.16
AT3G52100	15.09	15.05	14.98	14.7	14.87	14.83	14.51	14.55	14.55	14.52	14.47	14.52
AT1G35780	15.6	15.59	15.51	15.37	15.32	15.33	17.27	17.38	17.33	17.17	17.16	17.23
AT3G10740	15.96	15.93	15.91	15.67	15.7	15.7	15.89	15.88	15.9	15.68	15.73	15.72
AT5G23250	16.97	16.92	16.91	16.68	16.7	16.71	17.8	17.88	17.84	17.64	17.79	17.58
AT2G33340	15.88	15.84	15.88	15.62	15.64	15.6	16.66	16.62	16.64	16.47	16.5	16.43
AT3G44110	15.89	15.85	15.93	15.65	15.66	15.63	15.84	15.75	15.8	15.67	15.7	15.66
AT1G76690	15.38	15.41	15.3	15.03	15.24	15.11	14.19	14.22	14.06	14.11	14.04	14.09
AT3G17770	16.03	15.97	15.99	15.75	15.78	15.74	16.09	16.1	16.15	15.95	15.91	15.91
AT4G34490	17.3	17.21	17.28	16.98	17.08	17.02	17.76	17.74	17.78	17.49	17.49	17.46
AT5G46390	16.57	16.54	16.57	16.38	16.32	16.3	16.57	16.55	16.58	16.41	16.4	16.4
AT3G15610	14.75	14.65	14.7	14.48	14.47	14.46	16.21	16.17	16.19	15.99	16.01	15.95
AT2G19760	16.02	16	16.08	15.81	15.77	15.8	15.89	15.81	15.98	15.61	15.63	15.56
AT5G19350	16.06	15.97	16	15.72	15.77	15.82	15.54	15.53	15.53	15.48	15.39	15.35
AT4G29210	17.14	17.1	17.06	16.92	16.82	16.86	16.8	16.89	16.76	16.59	16.61	16.59
AT5G58470	16.35	16.34	16.35	16.13	16.12	16.09	16.04	16.08	16.07	15.88	15.89	15.83
AT4G15410	15.94	15.88	15.9	15.64	15.66	15.69	15.84	15.81	15.84	15.68	15.71	15.69
AT2G43770	15.91	15.94	15.89	15.69	15.65	15.67	16.24	16.21	16.29	15.98	16.05	16.02
AT2G02070	14.45	14.38	14.44	14.16	14.19	14.18	15.98	16.17	15.86	16.08	15.76	16.13
AT2G21660	15.5	15.47	15.52	15.25	15.26	15.27	15.83	15.82	15.86	15.56	15.55	15.52
AT3G49120	15.02	15.03	15.03	14.8	14.78	14.79	16.83	16.8	16.95	16.78	16.81	16.69
AT3G12740	15.89	16.05	15.86	15.62	15.78	15.68	15.79	15.81	15.76	15.48	15.49	15.39
AT3G52150	17.38	17.31	17.3	17.1	17.12	17.07	17.85	17.8	17.84	17.51	17.58	17.55
AT1G18270	16.78	16.75	16.75	16.53	16.54	16.52	16.46	16.43	16.48	16.27	16.27	16.31
AT1G51390	16.61	16.63	16.72	16.39	16.5	16.37	15.39	15.53	15.6	15.64	15.7	15.59
AT1G51840	16.56	16.45	16.47	16.28	16.32	16.18	16.9	16.78	16.95	16.83	16.66	16.82
AT3G16420	15.33	15.36	15.37	15.11	15.12	15.13	16.28	16.34	16.29	16.11	16.05	16.15
AT4G02510	16.36	16.28	16.33	16.08	16.12	16.08	16.53	16.47	16.51	16.38	16.43	16.37
AT5G16910	15.39	15.41	15.4	15.1	15.2	15.21	15.39	15.47	15.49	15.38	15.4	15.38
AT1G52200	15.38	15.42	15.09	14.7	15.07	15.41	16.46	16.55	16.56	16.34	16.24	16.27
AT5G14540	16.81	16.78	16.8	16.58	16.59	16.51	16.59	16.51	16.54	16.33	16.35	16.39
AT3G27740	16.49	16.49	16.49	16.26	16.25	16.24	16.08	16.09	16.12	15.96	15.97	16
AT2G03140	16.24	16.06	16.13	15.98	15.93	15.84	14.65	14.6	14.62	14.52	14.46	14.62
AT1G55500	16.29	16.21	16.19	16.01	15.97	16.02	16.66	16.6	16.66	16.51	16.48	16.51
AT4G18370	16.11	16.16	16.2	15.94	15.92	15.92	16.16	16.16	16.16	16.02	16.04	16.01
AT5G24460	15.48	15.57	15.58	15.28	15.36	15.33	16.08	16.03	16.17	15.95	15.95	15.98
AT5G44780	15.02	14.96	15	14.83	14.69	14.77	14.11	13.99	14.04	14.07	14.03	14.15
AT3G12500	14.54	14.45	14.54	14.3	14.29	14.24	14.39	14.42	14.32	14.33	14.35	14.26
AT5G62650	15.23	15.3	15.15	15.04	14.97	15	14.7	14.58	14.62	14.43	14.43	14.31
AT5G50960	15.15	15.03	15.08	14.89	14.87	14.81	15.88	15.87	16.06	15.87	15.84	15.91
AT5G60980	17.03	16.95	17	16.75	16.75	16.77	16.59	16.57	16.63	16.4	16.44	16.44
AT2G38410	15.15	15.12	15.13	14.93	14.85	14.92	14.34	14.23	14.29	14.14	14.26	14.16
AT2G13820	15.75	15.84	15.74	15.63	15.47	15.51	17.58	17.47	17.56	17.12	17.15	17.11
AT3G01650	16.1	16.04	16.13	15.82	15.83	15.92	14.65	14.83	14.77	14.96	14.71	15
AT3G20630	16.15	16.13	16.14	15.93	15.88	15.9	16.22	16.21	16.24	16.08	16.05	16.06
AT2G03680	16.19	16.1	16.17	15.95	15.93	15.88	18.3	18	18.1	17.97	18.03	17.98
AT4G17740	15.94	15.93	15.94	15.71	15.75	15.66	16.26	16.21	16.23	16.06	16.1	16.1
AT1G13020	16.7	16.75	16.76	16.54	16.48	16.49	16.91	16.91	16.95	16.82	16.81	16.79
AT4G35450	16.35	16.26	16.35	16.09	16.12	16.09	17.46	17.45	17.5	17.31	17.32	17.32
AT5G05710	16.22	16.15	16.13	16.1	15.88	15.83	16.31	16.24	16.23	16.07	16.07	16.14
AT1G17745	15.43	15.44	15.45	15.24	15.16	15.24	15.19	15.31	15.29	15.07	15	15.18
AT2G31570	17.44	17.43	17.45	17.24	17.23	17.17	18.57	18.41	18.53	17.92	17.95	17.88
AT1G32790	16.67	16.48	16.49	16.3	16.37	16.28	16.01	16.13	16.08	16.22	16.13	16.24
AT3G28200	15.9	16.1	16.06	15.83	15.75	15.8	16.01	16.04	15.99	15.74	15.68	15.75
AT2G33150	15.65	15.59	15.65	15.4	15.39	15.42	15.7	15.66	15.69	15.5	15.54	15.48
AT5G14580	16.51	16.47	16.48	16.25	16.28	16.25	15.9	15.89	15.89	15.76	15.73	15.72
AT2G32150	14.75	14.8	14.69	14.42	14.52	14.62	15.49	15.21	15.4	14.77	15.08	15.23
AT5G13970	15.73	16.11	15.96	15.84	15.47	15.69	16.28	16.16	16.28	16.08	16.12	16.05
AT5G63140	15.99	15.88	15.99	15.72	15.71	15.75	17.51	17.5	17.64	17.36	17.34	17.35
AT3G10490	16.31	16.33	16.33	16.09	16.1	16.09	15.7	15.77	15.74	15.7	15.58	15.8
AT3G19770	15.66	15.71	15.56	15.47	15.42	15.38	15.4	15.38	15.42	15.39	15.25	15.45
AT1G19580	16.01	15.95	16.01	15.75	15.72	15.79	16.2	16.24	16.22	16.11	16.08	16.18
AT5G22320	15.88	15.81	15.79	15.61	15.62	15.58	17.17	17.19	17.19	17.1	17.05	17.08
AT5G58440	15.31	15.38	15.31	15.06	15.06	15.17	16.02	16.18	16.08	15.93	15.81	16.01
AT1G18490	16.07	16.12	16.13	15.87	15.9	15.86	15.33	15.36	15.39	15.35	15.26	15.23
AT3G47590	15.96	15.91	15.82	15.73	15.67	15.61	17.53	17.45	17.51	17.08	17.27	17.23
AT1G65980	14.61	14.59	14.6	14.37	14.35	14.39	14.81	14.79	14.86	14.51	14.54	14.47
AT3G14100	14.98	14.84	14.91	14.7	14.68	14.69	14.41	14.55	14.53	14.3	14.32	14.33
AT4G22740	15.18	15.31	15.25	15	14.96	15.1	14.33	14.32	14.26	14.29	14.01	14.33
AT5G53620	16.3	16.29	16.28	16.06	16.05	16.07	15.7	15.69	15.72	15.55	15.55	15.54
AT5G07030	16.53	16.48	16.51	16.27	16.29	16.28	16.64	16.63	16.62	16.47	16.48	16.4
AT1G12780	14.6	14.54	14.53	14.36	14.29	14.32	14.82	14.7	14.76	14.36	14.48	14.46
AT2G38230	17.3	17.28	17.3	17.06	17.1	17.03	16.91	16.86	16.94	16.65	16.67	16.61
AT3G26030	15.56	15.55	15.42	15.36	15.24	15.24	14.92	14.94	15.13	15.02	15.02	15.15
AT3G02510	14.74	14.86	14.91	14.6	14.59	14.64	15.03	15.13	15.08	15.14	14.85	15.31
AT4G16380	17.46	17.5	17.51	17.3	17.27	17.23	19.03	18.79	19.25	18.83	18.8	18.78
AT3G13235	15.06	14.98	15.12	14.87	14.84	14.77	15.56	15.53	15.58	15.47	15.42	15.41
AT1G20970	15.62	15.62	15.64	15.4	15.43	15.38	16.33	16.32	16.31	16.16	16.19	16.1
AT5G40580	16.82	16.89	16.94	16.71	16.63	16.63	16.26	16.34	16.43	16.31	16.35	16.36
AT5G15490	16.16	16.07	16.14	15.87	15.93	15.88	15.42	15.46	15.39	15.21	15.26	15.18
AT2G16600	15.7	15.63	15.7	15.44	15.46	15.43	16.32	16.31	16.39	16.14	16.11	16.09
AT4G36020	16.14	16.11	16.14	15.87	15.95	15.9	16.34	16.29	16.3	16.11	16.13	16.03
AT2G22420	15.91	15.93	15.97	15.68	15.68	15.76	15.51	15.52	15.59	15.44	15.42	15.5
AT1G05250	16.09	16.05	16.1	15.83	15.87	15.85	16.38	16.31	16.36	16.18	16.21	16.19
AT3G50820	16.11	16.17	16.1	15.91	15.91	15.88	16.71	16.73	16.74	16.55	16.53	16.52
AT5G47430	14.89	15.01	14.98	14.64	14.72	14.82	15.37	15.33	15.44	15.32	15.34	15.25
AT4G33500	15.86	15.84	15.8	15.59	15.63	15.61	15.97	16.01	15.94	15.86	15.78	15.85
AT3G54170	14.63	14.72	14.7	14.54	14.41	14.43	14.91	15.05	15.05	15.09	15.01	15.17
AT3G52200	15.87	15.85	15.89	15.66	15.67	15.62	16.15	16.02	16.07	15.95	15.95	15.94
AT3G27570	14.7	14.73	14.7	14.52	14.5	14.44	14.9	14.86	14.91	14.79	14.79	14.75
AT5G25520	16.07	16.1	16.16	15.93	15.89	15.84	15.17	15.07	15.16	15.01	15.09	15
AT4G01310	17.37	17.35	17.38	17.17	17.14	17.12	16.81	16.8	16.8	16.63	16.61	16.58
AT3G19400	15.65	15.67	15.58	15.46	15.38	15.41	16.84	16.81	16.89	16.7	16.68	16.67
AT2G47850	16.37	16.28	16.38	16.15	16.1	16.1	14.91	14.87	14.83	14.69	14.69	14.66
AT2G20860	17.45	17.4	17.37	17.19	17.19	17.13	16.93	17.1	16.97	16.9	16.93	17.02
AT4G05530	16.52	16.49	16.51	16.31	16.25	16.28	15.76	15.83	15.77	15.57	15.67	15.64
AT5G06700	16.66	16.69	16.72	16.49	16.49	16.43	15.79	15.95	15.9	15.73	15.79	15.84
AT4G25340	16.12	16.03	16.03	15.84	15.89	15.79	15.72	15.66	15.72	15.63	15.71	15.65
AT4G28706	16.9	16.88	16.88	16.68	16.67	16.64	17.5	17.42	17.54	17.33	17.38	17.25
AT4G24280	16.54	16.48	16.52	16.3	16.32	16.25	16.16	16.12	16.19	15.99	16.02	15.95
AT5G15910	17.06	17.1	17.09	16.85	16.89	16.85	16.08	16.07	16.07	15.81	15.84	15.85
AT5G65110	16.41	16.41	16.43	16.17	16.2	16.21	16.18	16.12	16.18	16.13	16.12	16.15
AT1G18170	15.85	15.8	15.85	15.63	15.61	15.61	16.49	16.45	16.63	16.5	16.55	16.45
AT3G53390	16.14	16.02	16.17	15.85	15.96	15.86	15.6	15.67	15.66	15.57	15.43	15.6
AT1G29030	15.16	15.13	15.16	14.91	14.99	14.91	15.07	14.93	15.01	15.05	14.98	15.09
AT5G35735	15.5	15.57	15.35	15.23	15.23	15.29	16.77	16.76	16.83	16.94	16.98	16.94
AT1G48350	17.61	17.56	17.61	17.34	17.43	17.36	16.01	15.98	15.93	15.68	15.63	15.62
AT1G10580	16.87	16.77	16.89	16.64	16.66	16.58	16.84	16.74	16.83	16.76	16.74	16.7
AT2G33070	15.39	15.34	15.42	15.17	15.13	15.19	16.34	16.35	16.36	16.36	16.41	16.47
AT5G23210	16.99	16.94	16.98	16.72	16.81	16.73	17.73	17.69	17.72	17.59	17.65	17.57
AT1G07440	15.77	15.67	15.64	15.43	15.5	15.49	16.09	16.14	16.18	15.87	15.84	15.89
AT4G14300	15.57	15.58	15.54	15.32	15.33	15.39	15.29	15.29	15.36	15.25	15.23	15.21
AT2G18980	16.38	16.31	16.37	16.14	16.1	16.17	16.3	16.27	16.31	16.1	16.12	16.11
AT1G63310	16.06	15.96	15.94	15.79	15.71	15.79	14.78	14.78	14.87	14.67	14.79	14.63
AT4G12770	16.36	16.29	16.4	16.15	16.15	16.08	15.33	15.28	15.32	15.14	15.23	15.24
AT2G17200	14.56	14.46	14.44	14.23	14.25	14.29	15.04	15.15	15.07	14.92	14.9	14.96
AT5G01410	17.24	17.2	17.19	17.01	17.02	16.94	17.07	17.07	17.05	16.83	16.81	16.81
AT1G02780	14.86	14.69	14.73	14.51	14.54	14.58	15.06	15.03	15.05	15.05	15.06	15.03
AT4G25550	16.29	16.32	16.22	16.06	16.04	16.08	15.83	15.8	15.83	15.66	15.65	15.71
AT5G36210	17.13	17.05	17.14	16.85	16.93	16.88	17.37	17.32	17.41	17.2	17.19	17.19
AT1G77760	15.82	15.79	15.81	15.57	15.59	15.6	15.17	15.24	15.25	14.9	14.88	14.88
AT1G66580	15.57	15.38	15.48	15.27	15.27	15.24	16.24	16.24	16.3	16.14	16	16.12
AT1G12110	15.28	15.22	15.21	15.06	14.95	15.05	15.36	15.37	15.41	15.07	15.05	14.99
AT4G26690	16.29	16.31	16.33	16.12	16.08	16.08	16.92	16.95	16.96	16.77	16.75	16.78
AT1G49750	17.77	17.64	17.72	17.47	17.53	17.48	17.55	17.51	17.57	17.2	17.28	17.2
AT2G29360	16.35	16.35	16.4	16.16	16.18	16.12	15.16	15.15	15.25	15.16	15.06	15.11
AT2G41900	15.66	15.61	15.71	15.4	15.45	15.46	16.33	16.25	16.29	16.1	16.13	16.08
AT2G17265	15.79	15.72	15.76	15.54	15.53	15.53	16.69	16.63	16.73	16.44	16.47	16.44
AT3G12290	16.03	15.99	16.02	15.76	15.83	15.78	16.44	16.38	16.5	16.13	16.19	16.06
AT5G54830	16.41	16.37	16.16	16.14	16.07	16.09	16.06	16.13	16.08	15.93	15.96	15.96
AT1G60640	15.27	15.08	15.42	15.07	15.01	15.07	14.64	14.73	14.69	14.64	14.57	14.61
AT5G09620	16.13	16.12	16.06	15.92	15.88	15.83	16.17	16.13	16.15	15.91	15.88	15.89
AT5G57950	18.6	18.6	18.65	18.44	18.39	18.34	15.99	16.1	16.05	15.81	15.75	15.89
AT5G46180	14.81	14.74	14.7	14.6	14.58	14.42	16.05	16.04	16	15.87	15.83	15.89
AT5G14920	16.06	16.15	16.13	15.95	15.79	15.98	16.66	16.62	16.64	16.53	16.47	16.48
AT3G55460	16.47	16.52	16.44	16.24	16.25	16.21	16.48	16.47	16.5	16.32	16.33	16.34
AT4G32285	15.3	15.3	15.31	15.09	15.09	15.09	15.53	15.48	15.52	15.43	15.54	15.47
AT5G09590	15.63	15.58	15.62	15.4	15.41	15.36	15.8	15.78	15.8	15.68	15.69	15.66
AT3G13930	16.28	16.27	16.26	16.03	16.08	16.02	16.21	16.18	16.23	16.09	16.09	16.05
AT2G42710	15.03	14.99	15.02	14.8	14.77	14.82	16.15	16.14	16.17	16.09	16.12	16.13
AT3G12390	14.9	14.87	14.85	14.68	14.65	14.63	15.25	15.16	15.25	14.94	14.95	14.9
AT3G56130	16.55	16.51	16.5	16.31	16.26	16.31	16.04	15.96	15.96	15.94	15.98	15.93
AT2G36480	15.93	15.92	15.9	15.69	15.74	15.69	15.99	15.99	16.06	15.91	15.9	15.91
AT1G48850	16.62	16.59	16.63	16.4	16.4	16.39	16.78	16.78	16.78	16.62	16.65	16.52
AT5G16730	16.57	16.57	16.58	16.34	16.36	16.37	16.75	16.76	16.75	16.6	16.54	16.56
AT3G56860	15.21	15.24	15.26	15.09	15	14.98	15.41	15.35	15.47	15.3	15.34	15.24
AT3G44990	15.76	15.7	15.73	15.56	15.5	15.47	15.47	15.44	15.45	15.22	15.19	15.2
AT3G23280	16.25	16.47	16.35	16.08	16.07	16.29	16.01	16.11	16.17	16	15.9	15.96
AT4G27440	16.3	16.23	16.31	16.03	16.12	16.06	16.3	16.27	16.32	16.15	16.15	16.14
AT4G22320	15.37	15.35	15.22	15.08	15.03	15.19	16.75	16.85	16.83	16.49	16.59	16.45
AT1G74690	15.86	15.81	15.89	15.6	15.68	15.64	15.08	15.19	15.05	15.22	15.2	15.33
AT4G14930	15.76	15.75	15.72	15.54	15.54	15.51	16.24	16.31	16.3	16.13	16.16	16.16
AT2G19520	16.26	16.24	16.29	16.04	16.1	15.99	15.87	15.79	15.79	15.6	15.63	15.7
AT4G13430	15.58	15.6	15.59	15.36	15.39	15.36	16.28	16.24	16.3	16.09	16.12	16.06
AT1G28680	16.66	16.66	16.71	16.47	16.49	16.43	16.56	16.53	16.61	16.36	16.4	16.33
AT5G41685	17.3	17.22	17.2	16.99	17.11	16.99	16.5	16.41	16.49	16.41	16.46	16.29
AT4G26780	16.44	16.33	16.39	16.16	16.19	16.16	16.48	16.35	16.45	16.28	16.26	16.25
AT1G11650	16.52	16.52	16.52	16.32	16.32	16.28	16.78	16.73	16.73	16.61	16.73	16.68
AT4G18810	16.79	16.77	16.81	16.58	16.61	16.57	16.42	16.39	16.46	16.3	16.28	16.23
AT5G11890	16.6	16.62	16.6	16.36	16.31	16.51	17.41	17.42	17.46	17.31	17.26	17.29
AT4G27860	16.24	16.13	16.18	16.03	16	15.9	15.74	15.66	15.76	15.76	15.76	15.81
AT2G38560	16.64	16.65	16.69	16.47	16.41	16.46	16.24	16.22	16.29	16.07	16.14	15.95
AT3G02830	15.87	15.87	15.87	15.65	15.64	15.63	16.93	16.95	16.96	16.85	16.86	16.74
AT3G56070	15.41	15.36	15.38	15.16	15.21	15.13	16.12	16.1	16.1	15.97	15.96	15.97
AT4G29830	16.45	16.46	16.42	16.27	16.23	16.21	16.52	16.48	16.49	16.4	16.4	16.39
AT2G19430	15.94	15.96	15.91	15.66	15.78	15.75	15.74	15.82	15.76	15.74	15.64	15.69
AT1G74020	16.5	16.43	16.51	16.28	16.27	16.24	17.25	17.18	17.27	17.05	17.1	17.08
AT5G06060	16.77	16.7	16.72	16.51	16.54	16.5	17.9	17.83	17.96	17.65	17.69	17.63
AT2G20330	15.81	15.84	15.82	15.64	15.61	15.58	15.91	15.88	15.94	15.75	15.73	15.76
AT5G10460	17.48	17.45	17.44	17.29	17.22	17.23	18.57	18.48	18.52	18.34	18.34	18.25
AT5G12120	15.75	15.83	15.82	15.53	15.55	15.69	15.33	15.37	15.38	15.17	15.22	15.25
AT5G56260	16.14	16.08	16.13	15.9	15.95	15.86	16.77	16.69	16.79	16.58	16.59	16.52
AT2G41800	15.84	15.78	15.8	15.61	15.55	15.62	16.79	16.73	16.71	16.78	16.76	16.67
AT5G47320	14.49	14.4	14.62	14.28	14.23	14.38	14.33	14.38	14.44	14.39	14.32	14.33
AT2G43090	17.52	17.43	17.46	17.29	17.25	17.24	16.99	16.9	16.96	16.77	16.79	16.73
AT1G70580	14.89	14.83	14.86	14.64	14.65	14.67	16.18	16.18	16.23	16.11	16.08	16.1
AT3G55070	16.77	16.75	16.85	16.6	16.6	16.54	16.15	16.06	16.08	16.03	15.98	15.96
AT3G49010	16.8	16.64	16.63	16.44	16.53	16.46	15.71	15.66	15.7	15.71	15.69	15.7
AT2G39080	16.69	16.61	16.65	16.39	16.49	16.42	17.02	16.89	16.97	16.69	16.7	16.71
AT3G61670	16.03	16.03	16.13	15.66	15.76	16.03	15.81	15.73	15.75	15.59	15.58	15.65
AT5G54580	16.32	16.21	16.19	15.97	16.09	16.03	16.18	16.01	16.23	16.05	15.98	15.96
AT4G21580	16.12	16.02	16.04	15.88	15.85	15.82	15.78	15.8	15.79	15.66	15.65	15.63
AT3G48350	16.07	16.06	16.08	15.86	15.89	15.82	15.43	15.37	15.45	15.31	15.32	15.35
AT3G44100	17.33	17.3	17.26	17.09	17.09	17.09	16.21	16.15	16.23	16.06	16.04	16.04
AT2G17390	16.09	16.03	15.99	15.82	15.83	15.82	16.13	16.03	16.09	15.85	15.89	15.86
AT1G54220	16.14	16.08	16.19	15.93	15.95	15.92	15.82	15.79	15.82	15.69	15.73	15.69
AT4G03110	17.5	17.47	17.44	17.27	17.28	17.23	17.02	16.93	17.06	16.88	16.84	16.89
AT3G04720	15.47	15.49	15.32	15.29	15.11	15.26	16.1	16.25	16.09	15.93	15.86	15.98
AT5G58070	16.32	16.21	16.24	16.05	16.06	16.02	16.01	16.06	16.03	16	16.04	15.98
AT5G43600	16.29	16.2	16.23	16.02	16.08	15.98	16.72	16.64	16.71	16.48	16.49	16.51
AT2G16710	16.41	16.46	16.34	16.24	16.23	16.13	15.64	16	15.72	15.67	15.71	15.72
AT1G06680	15.96	15.9	15.92	15.7	15.74	15.72	15.77	15.75	15.76	15.49	15.5	15.51
AT4G17890	15.37	15.42	15.35	15.24	15.11	15.15	16.35	16.36	16.33	16.27	16.2	16.28
AT2G21060	13.9	13.94	14.01	13.78	13.69	13.76	16.07	16.09	16.11	15.97	15.87	16.01
AT1G11580	16.51	16.46	16.49	16.28	16.3	16.25	16.97	16.93	16.96	16.72	16.73	16.7
AT3G52500	15.81	15.79	15.76	15.6	15.54	15.59	16.78	16.73	16.83	16.61	16.59	16.59
AT3G04230	16.96	16.85	16.96	16.7	16.77	16.67	17.27	17.23	17.35	17.21	17.21	17.18
AT2G26570	16.01	15.99	15.98	15.8	15.77	15.78	16.35	16.36	16.35	16.14	16.09	16.17
AT1G09390	14.82	14.65	14.67	14.46	14.59	14.48	15.56	15.55	15.55	15.41	15.32	15.37
AT1G78200	16.09	16.18	16.18	15.95	15.86	15.98	16.72	16.62	16.68	16.39	16.4	16.39
AT3G04780	17.18	17.06	17.01	16.88	17	16.76	15.49	15.46	15.54	15.27	15.14	15.22
AT1G30900	14.63	14.69	14.5	14.34	14.42	14.44	15.3	15.31	15.31	14.95	14.97	14.8
AT1G29040	15.63	15.44	15.71	15.43	15.46	15.27	16.05	16.01	16.03	15.88	15.95	15.89
AT1G78850	16.02	15.95	15.99	15.73	15.83	15.76	16.4	16.33	16.39	16.29	16.33	16.21
AT5G01390	16.25	16.23	16.16	16.01	15.95	16.04	17.8	17.69	17.69	17.46	17.55	17.48
AT5G14680	15.15	14.98	15.12	14.85	14.83	14.94	15.3	15.45	15.21	15.37	15.25	15.16
AT4G12400	14.81	14.8	14.82	14.54	14.62	14.65	16.26	16.27	16.23	15.91	15.97	15.9
AT5G13950	15.96	15.93	15.97	15.72	15.72	15.79	15.42	15.45	15.48	15.36	15.32	15.41
AT4G23190	15.8	15.68	15.78	15.58	15.42	15.63	16.06	16	16.01	15.92	15.84	15.99
AT1G14810	15.46	15.44	15.46	15.25	15.23	15.24	15.85	15.81	15.86	15.65	15.66	15.63
AT4G00930	15.41	15.47	15.47	15.26	15.22	15.26	16.18	16.21	16.24	16.14	16.18	16.11
AT3G23400	15.95	15.92	15.96	15.75	15.76	15.71	16.11	16.09	16.11	15.97	15.95	15.94
AT1G54000	15.73	15.71	15.7	15.47	15.53	15.5	16.83	16.76	16.8	16.58	16.59	16.58
AT1G78870	17.13	17.01	17.18	16.91	16.94	16.85	15.44	15.55	15.45	15.68	15.36	15.95
AT3G48560	15.07	15.02	15.1	14.87	14.86	14.84	15.71	15.71	15.75	15.56	15.55	15.59
AT1G33810	15.78	15.68	15.75	15.53	15.5	15.56	16.61	16.61	16.63	16.54	16.57	16.54
AT4G26750	14.91	14.89	14.93	14.74	14.71	14.68	16.74	16.68	16.63	16.68	16.61	16.68
AT1G80000	17.01	16.87	17.01	16.73	16.68	16.83	15.31	15.36	15.3	15.32	15.26	15.26
AT2G36835	16.28	16.09	16.2	15.94	16.05	15.97	16.6	16.44	16.57	16.58	16.6	16.56
AT3G22480	16.59	16.59	16.55	16.38	16.4	16.34	15.99	16.07	16.06	15.9	15.92	15.9
AT2G06050	16.72	16.68	16.69	16.51	16.46	16.48	16.54	16.55	16.53	16.49	16.42	16.46
AT3G02860	15.52	15.56	15.63	15.42	15.36	15.32	16.29	16.37	16.29	16.3	16.16	16.39
AT3G47800	15.83	15.75	15.75	15.58	15.58	15.55	16.47	16.4	16.47	16.23	16.25	16.23
AT5G10050	15.51	15.45	15.48	15.28	15.29	15.28	15.31	15.45	15.46	15.26	15.28	15.23
AT1G71840	16.01	15.99	15.99	15.82	15.77	15.79	15.62	15.47	15.56	15.44	15.39	15.32
AT1G48950	16.22	16.26	16.3	16.05	16.04	16.05	15.91	15.9	15.98	15.77	15.68	15.65
AT3G56490	15.77	15.7	15.82	15.61	15.58	15.49	16.43	16.43	16.43	16.33	16.39	16.38
AT1G74070	16.38	16.36	16.43	16.19	16.15	16.19	16.86	16.81	16.83	16.72	16.7	16.75
AT2G28470	15.41	15.38	15.36	15.21	15.14	15.17	15.57	15.5	15.52	15.31	15.31	15.32
AT4G14540	16.92	16.94	16.94	16.71	16.78	16.7	17.77	17.68	17.89	17.84	17.92	17.9
AT3G20970	14.5	14.52	14.55	14.36	14.4	14.18	14.8	14.76	14.76	14.63	14.76	14.69
AT5G16880	16.23	16.15	16.19	16	16	15.94	17.6	17.51	17.62	17.34	17.36	17.38
AT3G10220	16.23	16.27	16.23	16.07	16.03	16.01	15.64	15.55	15.57	15.46	15.45	15.41
AT4G13360	17.19	17.14	17.19	16.94	17.01	16.95	16.5	16.5	16.5	16.26	16.34	16.3
AT5G26000	17.31	17.26	17.31	17.08	17.12	17.07	17.22	17.19	17.23	17.01	17.06	17.01
AT1G67950	14.76	14.87	14.74	14.57	14.56	14.6	15.96	15.9	15.89	15.74	15.71	15.68
AT1G74960	17.05	17.04	17.11	16.9	16.83	16.85	17.33	17.25	17.39	17.1	17.12	17.09
AT5G23200	15.94	15.82	15.8	15.69	15.62	15.64	17.03	17.05	17.04	16.89	16.96	16.88
AT3G30841	16.41	16.38	16.38	16.18	16.17	16.2	15.35	15.38	15.46	15.47	15.36	15.68
AT3G05910	15.69	15.77	15.69	15.48	15.46	15.59	16.43	16.53	16.52	16.27	16.2	16.37
AT4G14145	15.44	15.63	15.48	15.3	15.07	15.54	16.52	16.73	16.57	16.79	16.57	16.72
AT3G07390	18.5	18.47	18.52	18.31	18.32	18.26	20.1	20.05	20.08	19.8	19.82	19.74
AT2G27710	15.21	15.13	15.21	14.97	15.01	14.94	14.5	14.43	14.46	14.54	14.59	14.49
AT4G29360	16.07	15.98	15.94	15.73	15.78	15.86	14.9	15.04	14.92	14.95	14.67	14.8
AT4G09750	15.14	15.03	15.07	14.88	14.88	14.86	16.19	16.16	16.25	16.01	15.99	16.06
AT2G01750	15.41	15.42	15.35	15.26	15.1	15.19	16.17	16.12	16.12	15.9	15.99	15.91
AT1G80670	15.96	15.95	15.97	15.74	15.78	15.75	16.68	16.61	16.65	16.5	16.53	16.5
AT3G24503	17	16.98	16.99	16.79	16.8	16.77	16.38	16.37	16.44	16.24	16.26	16.25
AT5G23510	14.79	14.94	14.95	14.56	14.66	14.85	17.61	17.52	17.68	17.33	17.4	17.35
AT4G12730	16.42	16.45	16.48	16.18	16.25	16.31	15.48	15.41	15.4	15.22	15.28	15.1
AT5G02270	15.82	15.73	15.99	15.35	15.83	15.73	15.65	15.84	15.64	15.7	15.73	15.83
AT4G18905	16.34	16.29	16.38	16.15	16.09	16.16	17.23	17.25	17.17	17.1	17.04	17.11
AT1G72410	16.05	16.11	16.06	15.86	15.87	15.88	16.37	16.36	16.43	16.26	16.27	16.3
AT2G38580	15.73	15.74	15.68	15.52	15.45	15.56	16.55	16.5	16.64	16.27	16.23	16.22
AT2G26060	15.58	15.48	15.57	15.35	15.31	15.37	16.33	16.36	16.36	16.22	16.26	16.18
AT3G12600	16.75	16.76	16.73	16.55	16.59	16.51	16.13	16.05	16.1	15.8	15.73	15.77
AT5G10070	13.9	13.93	13.98	13.79	13.66	13.73	16.55	16.45	16.5	16.29	16.37	16.22
AT5G64080	17.46	17.38	17.46	17.24	17.26	17.19	17.32	17.26	17.37	17.12	17.14	17.07
AT5G42100	16.39	16.29	16.37	16.14	16.15	16.18	16.7	16.69	16.69	16.43	16.5	16.39
AT4G29060	16.6	16.55	16.58	16.36	16.41	16.35	16.83	16.74	16.79	16.58	16.61	16.55
AT2G29290	17.29	17.12	17.17	17.01	17.05	16.93	18.43	18.44	18.43	18.05	18.14	18.05
AT1G45145	17.37	17.22	17.27	17.11	17.1	17.09	17.36	17.42	17.43	16.88	16.94	16.87
AT2G05710	16.51	16.5	16.52	16.3	16.32	16.29	16.69	16.67	16.72	16.51	16.53	16.48
AT5G17910	15.23	15.32	15.28	15.05	15.06	15.1	15.04	15.05	15.06	14.89	14.88	14.92
AT5G54370	16.41	16.28	16.39	16.14	16.22	16.14	18.48	18.47	18.48	18.39	18.46	18.24
AT5G55070	17.01	16.98	17.04	16.83	16.82	16.8	17.4	17.33	17.39	17.24	17.27	17.18
AT1G71310	16.36	16.37	16.33	16.17	16.15	16.14	16.49	16.51	16.58	16.43	16.41	16.31
AT2G45600	15.79	15.74	15.71	15.58	15.49	15.6	15.82	15.78	15.78	15.86	15.8	15.77
AT1G14210	15.41	15.38	15.41	15.24	15.15	15.2	16.32	16.27	16.32	16.47	16.44	16.44
AT4G32320	15.26	15.32	15.21	15.05	15.12	15.02	15.31	15.34	15.32	15.18	15.09	15.27
AT3G04820	16.5	16.62	16.55	16.38	16.31	16.38	16.54	16.51	16.52	16.36	16.39	16.41
AT3G45310	15.12	14.98	15.08	14.91	14.83	14.84	15.92	15.98	16	15.91	15.77	16.01
AT5G20080	16.82	16.84	16.85	16.64	16.67	16.61	17.44	17.29	17.45	17.29	17.32	17.23
AT3G15360	17.63	17.58	17.63	17.43	17.42	17.38	16.68	16.67	16.71	16.56	16.57	16.57
AT2G40070	16.49	16.51	16.46	16.3	16.28	16.29	15.98	15.93	15.93	15.8	15.86	15.82
AT1G17290	17.31	17.3	17.27	17.09	17.13	17.06	17.66	17.6	17.67	17.43	17.47	17.4
AT4G29730	16.77	16.71	16.73	16.54	16.52	16.54	14.74	14.74	14.72	14.72	14.56	14.49
AT3G24430	16.03	16.01	16.04	15.8	15.86	15.81	16.13	16.09	16.13	15.95	15.98	15.93
AT1G33610	15.96	15.93	16.12	15.82	15.74	15.87	16.64	16.64	16.72	16.37	16.3	16.39
AT1G01800	16.88	16.85	16.93	16.68	16.73	16.65	16.93	16.93	17	16.62	16.58	16.62
AT2G44210	16.72	16.61	16.65	16.47	16.5	16.42	17.04	17.03	17.18	16.74	16.66	16.46
AT4G27000	15.81	15.79	15.82	15.61	15.61	15.6	17.01	17.07	17.09	16.91	16.91	16.94
AT3G48460	15.9	15.87	15.92	15.66	15.75	15.68	15.75	15.8	15.79	15.46	15.52	15.5
AT3G60340	16.94	17.01	16.94	16.78	16.77	16.73	15.43	15.36	15.42	15.23	15.27	15.23
AT1G03230	17.52	17.42	17.51	17.29	17.31	17.26	17	16.92	16.96	16.8	16.83	16.81
AT1G71880	15.24	15.29	15.19	15.06	15.06	15.01	15.86	15.89	15.89	15.68	15.69	15.62
AT2G20790	14.83	14.94	14.92	14.78	14.7	14.62	15.54	15.58	15.54	15.5	15.3	15.46
AT5G66040	15.99	15.78	15.72	15.72	15.62	15.57	15.25	15.29	15.19	14.93	14.98	14.81
AT4G26900	16.38	16.36	16.4	16.2	16.17	16.17	16.29	16.29	16.3	16.13	16.11	16.09
AT3G26990	15.84	15.75	15.77	15.63	15.63	15.51	15.77	15.9	15.79	15.72	15.64	15.73
AT5G17710	16.53	16.52	16.5	16.31	16.34	16.3	16.42	16.39	16.39	16.32	16.34	16.32
AT3G15840	16.45	16.55	16.54	16.31	16.34	16.32	15.74	15.74	15.85	15.77	15.77	15.8
AT2G16780	17.1	16.92	17	16.83	16.84	16.73	17.28	17.27	17.24	16.97	16.99	16.94
AT3G13790	16.01	15.99	16	15.79	15.81	15.81	16.07	16.02	16.07	15.9	15.94	15.96
AT5G26667	16.28	16.27	16.29	16.16	16.06	16.03	16.18	16.19	16.15	16	16	15.99
AT3G44320	15.37	15.28	15.34	15.26	15.07	15.07	16.2	16.2	16.21	16.16	16.13	16.2
AT1G21450	14.83	14.79	14.84	14.67	14.56	14.67	14.75	14.66	14.7	14.61	14.69	14.82
AT1G77940	16.65	16.64	16.67	16.43	16.47	16.47	15.94	15.96	15.94	15.78	15.88	15.76
AT5G07940	14.44	14.38	14.44	14.22	14.26	14.2	15.62	15.6	15.69	15.52	15.56	15.52
AT3G52870	16.64	16.5	16.69	16.44	16.39	16.42	15.59	15.67	15.7	15.47	15.6	15.51
AT2G44200	15.76	15.75	15.85	15.52	15.7	15.6	16.13	15.96	16.11	16.07	16.17	16.01
AT2G20260	15.6	15.59	15.63	15.39	15.44	15.4	16.28	16.25	16.3	16.14	16.16	16.16
AT5G62810	15.45	15.42	15.48	15.26	15.23	15.27	15.5	15.49	15.53	15.38	15.37	15.41
AT4G14200	14.97	14.96	14.99	14.74	14.83	14.76	15.65	15.7	15.64	15.55	15.55	15.59
AT3G03890	17.28	17.28	17.3	17.08	17.1	17.09	16.28	16.2	16.34	16.13	16.13	16.04
AT2G43410	15.69	15.73	15.68	15.54	15.51	15.46	16.99	16.98	17.08	16.84	16.91	16.87
AT1G66270	16.65	16.72	16.75	16.52	16.53	16.48	16.39	16.28	16.33	16.31	16.33	16.35
AT4G24730	15.23	15.26	15.26	15.07	15.04	15.07	16.08	16.18	16.1	16.03	16	16.01
AT2G01420	16.29	16.16	16.08	16.01	16.01	15.94	15.69	15.8	15.45	15.62	15.39	15.79
AT4G12910	17.56	17.6	17.61	17.35	17.41	17.44	16.57	16.57	16.68	16.29	16.57	16.34
AT5G04885	16.5	16.49	16.48	16.31	16.27	16.29	16.2	16.24	16.24	16.04	16.01	16.09
AT3G14010	15.86	15.86	15.85	15.62	15.63	15.72	15.71	15.68	15.69	15.59	15.57	15.55
AT4G13200	16.51	16.48	16.48	16.27	16.3	16.3	17.02	16.93	16.99	16.79	16.76	16.74
AT1G33050	15.52	15.7	15.62	15.4	15.31	15.53	16.69	16.73	16.62	16.47	16.48	16.51
AT5G55660	16.58	16.5	16.55	16.36	16.36	16.34	17.06	17.01	17.12	16.88	16.87	16.79
AT4G31140	16.79	16.69	16.8	16.55	16.62	16.54	16.61	16.51	16.51	16.35	16.34	16.43
AT1G12240	16.62	16.62	16.68	16.45	16.46	16.45	16.81	16.71	16.81	16.59	16.64	16.61
AT4G26910	16.53	16.54	16.52	16.33	16.35	16.32	16.02	15.91	16	15.82	15.81	15.72
AT1G21880	13.99	14.02	14.06	13.85	13.85	13.77	14.09	14.18	14.13	13.99	13.97	14.06
AT5G40170	15.99	16.07	16.02	15.83	15.76	15.88	16.57	16.66	16.6	16.4	16.36	16.53
AT1G75100	15.61	15.59	15.55	15.4	15.39	15.37	15.43	15.43	15.42	15.31	15.27	15.26
AT5G64430	15.54	15.61	15.58	15.32	15.33	15.47	15.47	15.54	15.43	15.29	15.27	15.25
AT5G49530	14.88	14.88	14.76	14.66	14.64	14.64	15.76	15.65	15.72	15.59	15.68	15.59
AT1G80620	16.06	16.09	16.02	15.89	15.87	15.84	15.99	15.92	16.01	16.06	16.03	16.1
AT1G27950	17.92	17.81	17.91	17.68	17.71	17.68	18.49	18.41	18.49	18.18	18.33	18.23
AT1G16790	16.65	16.69	16.66	16.46	16.52	16.44	16.3	16.27	16.3	16.17	16.19	16.12
AT1G11240	15.9	15.85	15.91	15.71	15.68	15.7	15.5	15.61	15.55	15.61	15.6	15.52
AT3G12680	15.67	15.74	15.67	15.5	15.49	15.54	15.69	15.68	15.59	15.41	15.43	15.42
AT1G67310	14.75	14.62	14.75	14.57	14.43	14.54	14.77	14.88	14.84	14.92	14.81	15.1
AT2G26930	15.91	15.93	15.93	15.75	15.71	15.74	17.23	17.21	17.23	17.1	17.07	16.96
AT1G54010	15.64	15.6	15.66	15.48	15.45	15.41	16.39	16.4	16.43	16.25	16.23	16.26
AT3G15520	16.93	16.8	16.89	16.68	16.72	16.65	16.79	16.72	16.79	16.54	16.58	16.49
AT3G55440	16.43	16.39	16.37	16.2	16.21	16.18	16.94	16.89	16.94	16.69	16.74	16.7
AT5G06320	16.08	16.06	16.05	15.88	15.85	15.86	15.68	15.74	15.66	15.55	15.53	15.49
AT5G05730	15.59	15.58	15.56	15.37	15.37	15.41	16.07	16.04	16.07	15.9	15.88	15.91
AT4G33010	16.56	16.51	16.53	16.35	16.34	16.34	15.95	15.9	15.99	15.69	15.73	15.7
AT3G20390	16.66	16.57	16.61	16.42	16.42	16.42	16.15	16.03	16.08	15.73	15.73	15.69
AT4G22240	16.78	16.76	16.7	16.57	16.54	16.55	16.09	16.06	16.09	15.91	15.96	15.93
AT3G22520	15.84	15.86	15.87	15.66	15.67	15.68	16.22	16.18	16.29	16.15	16.16	16.16
AT3G08590	17.02	16.93	17.03	16.82	16.78	16.82	16.73	16.72	16.7	16.51	16.54	16.45
AT3G13570	15.78	15.85	15.87	15.6	15.64	15.69	15.73	15.73	15.78	15.62	15.58	15.6
AT5G60410	15.58	15.59	15.47	15.4	15.33	15.33	15.51	15.5	15.51	15.59	15.5	15.58
AT1G70200	16.44	16.41	16.38	16.23	16.2	16.19	16.95	16.89	16.96	16.82	16.79	16.77
AT4G27870	15.13	15.26	15.21	15.04	14.97	15.02	15.38	15.42	15.5	15.27	15.31	15.33
AT3G48330	16.23	16.13	16.23	16	16.01	16.01	16.05	16.07	16.2	16	15.82	15.98
AT2G34860	15.08	15.07	15.13	14.98	14.92	14.8	15.15	15.02	15.19	15.25	15.32	15.16
AT2G02170	15.4	15.37	15.41	15.28	15.09	15.24	16.12	16.1	16.13	15.96	15.92	15.93
AT1G18450	16.33	16.27	16.32	16.12	16.14	16.09	15.79	15.77	15.77	15.6	15.6	15.61
AT4G31750	15.85	15.89	15.78	15.65	15.64	15.63	17.61	17.58	17.71	17.57	17.48	17.54
AT3G15010	14.99	15.13	14.97	14.82	14.81	14.91	15.34	15.37	15.37	15.22	15.21	15.25
AT5G35330	14.38	14.46	14.28	14.28	14.06	14.21	15.54	15.56	15.49	15.24	15.22	15.39
AT3G12490	16.37	16.26	16.35	16.18	16.14	16.1	16.24	16.23	16.23	16	16.07	15.97
AT5G37510	16.05	15.99	16.04	15.85	15.84	15.82	16.4	16.35	16.4	16.21	16.22	16.17
AT1G27310	17.92	17.9	17.96	17.78	17.79	17.65	18.91	18.74	18.83	18.39	18.45	18.28
AT4G29690	16.65	16.64	16.61	16.43	16.46	16.44	16.44	16.51	16.45	16.41	16.42	16.39
AT1G58110	16.42	16.31	16.86	16.51	16.32	16.24	15.56	15.88	15.61	15.55	15.4	15.79
AT4G02270	15.66	15.71	15.73	15.45	15.49	15.59	16.67	16.73	16.68	16.54	16.56	16.56
AT1G58025	15.35	15.4	15.36	15.16	15.12	15.23	15.85	15.89	15.88	15.79	15.72	15.76
AT1G29350	15.31	15.19	15.36	15.07	15.12	15.1	17.23	17.02	17.27	16.85	16.81	16.85
AT3G07320	16.03	15.96	16.04	15.81	15.84	15.81	15.21	15.13	15.23	15.11	15.06	15.12
AT5G50370	15.77	15.74	15.77	15.59	15.55	15.57	16.14	16.09	16.1	15.99	15.98	15.99
AT1G64500	15.54	15.55	15.57	15.41	15.34	15.34	15.86	15.88	15.87	15.61	15.58	15.61
AT3G01920	15.29	15.3	15.32	15.1	15.11	15.13	14.83	14.77	14.86	14.95	14.96	14.97
AT5G33320	16.29	16.44	16.42	16.11	16.23	16.26	16.09	16.22	16.14	16.02	15.94	15.99
AT3G44750	16.91	16.91	16.99	16.75	16.75	16.74	17.35	17.3	17.35	17.22	17.26	17.24
AT5G14610	15.46	15.56	15.52	15.29	15.32	15.38	14.54	14.5	14.47	14.45	14.52	14.53
AT3G61310	14.55	14.52	14.54	14.4	14.29	14.35	14.74	14.76	15.03	14.93	14.83	14.88
AT3G18130	16.94	16.93	16.99	16.74	16.81	16.71	17.24	17.2	17.2	17.22	17.28	17.21
AT4G30440	14.99	15.13	15.09	14.91	14.73	14.98	15.47	15.51	15.43	15.28	15.16	15.22
AT1G19870	16.06	16.03	16.07	15.86	15.87	15.87	16.12	16.04	16.1	16	16.05	15.96
AT2G25070	17.47	17.4	17.38	17.22	17.21	17.25	17.18	17.2	17.26	17.01	17.02	16.95
AT1G43700	18.88	18.72	18.65	18.52	18.61	18.58	16.44	16.57	16.52	16.47	16.24	16.37
AT2G40600	16.24	16.33	16.35	16.11	16.2	16.04	13.9	13.84	13.9	13.65	13.78	13.93
AT1G04970	15.35	15.28	15.34	15.25	15.07	15.1	15.53	15.58	15.52	15.43	15.31	15.38
AT2G17720	15.97	15.96	16.02	15.81	15.82	15.76	16.55	16.5	16.61	16.49	16.42	16.46
AT5G53930	15.05	15.09	15.07	14.84	14.89	14.92	14.26	14.28	14.24	14.18	14.23	14.25
AT1G50940	16.05	16.02	16.07	15.87	15.85	15.86	15.72	15.66	15.66	15.48	15.53	15.44
AT1G52070	14.49	14.54	14.53	14.32	14.37	14.28	15.11	15.09	15.17	14.88	14.9	14.9
AT1G80230	16.01	16.02	15.91	15.88	15.72	15.77	17.05	17.04	17.2	17.03	17.06	17.06
AT5G03730	13.87	13.98	13.97	13.79	13.73	13.72	14.89	15.11	14.85	14.75	14.69	14.84
AT2G36530	16.24	16.18	16.21	16.02	16.02	16	16.17	16.15	16.19	15.99	15.98	15.97
AT4G16260	15.29	15.2	15.36	15.15	15.06	15.07	15.94	16.01	16.03	15.89	16.01	15.83
AT3G01520	16.15	16.07	16.15	15.96	15.98	15.9	18.05	17.97	18.09	17.72	17.73	17.74
AT1G53645	15.91	15.84	15.92	15.72	15.72	15.64	16.18	16.18	16.22	16.12	16.06	16.11
AT1G14440	15.62	15.51	15.48	15.33	15.38	15.35	14.93	14.99	14.95	14.88	14.89	14.87
AT5G35970	16.19	16.17	16.23	16.07	15.96	16.02	16.07	16.04	16.08	15.89	15.89	15.92
AT3G03980	16.77	16.78	16.77	16.57	16.6	16.59	16.39	16.43	16.39	16.3	16.27	16.32
AT5G67500	16.14	16.08	16.11	15.94	15.94	15.89	16.57	16.42	16.61	16.33	16.33	16.22
AT1G65270	16.31	16.42	16.34	16.17	16.15	16.15	16.39	16.3	16.43	16.39	16.33	16.48
AT4G31300	16.6	16.57	16.6	16.43	16.41	16.37	17.06	17.07	17.11	16.93	16.92	16.91
AT3G05000	15.18	15.17	15.23	14.97	15.12	14.93	14.96	14.91	14.88	15.01	15.06	15.02
AT5G22880	16.93	16.84	16.93	16.69	16.76	16.67	17.86	17.73	17.8	17.75	17.83	17.69
AT1G66680	15.18	15.23	15.18	15.03	14.99	15.02	15.7	15.69	15.74	15.51	15.55	15.53
AT3G44300	15.46	15.54	15.49	15.26	15.28	15.41	15.32	15.52	15.46	15.47	15.33	15.36
AT5G39830	16.86	16.78	16.79	16.59	16.65	16.62	17.11	17.06	17.13	16.89	16.93	16.89
AT1G22270	16.7	16.87	16.69	16.6	16.61	16.5	15.29	15.41	15.36	15.47	15.25	15.54
AT2G35120	16.95	17	16.92	16.79	16.78	16.75	17.14	17.07	17.08	16.98	17.05	16.93
AT5G55200	15.7	15.65	15.63	15.52	15.47	15.44	15.28	15.34	15.22	15.2	15.13	15.32
AT2G30200	16.63	16.55	16.65	16.42	16.46	16.4	16.46	16.43	16.48	16.28	16.33	16.22
AT2G42670	17.07	16.92	17	16.7	16.94	16.78	15.58	15.59	15.55	15.38	15.39	15.49
AT5G52840	15.16	15.39	15.21	15.04	15.05	15.12	17.07	17.08	17.04	17.37	17.33	17.34
AT5G65180	14.33	14.53	14.33	14.16	14.27	14.22	16.27	15.84	15.74	15.53	15.52	15.47
AT4G38460	15.48	15.47	15.48	15.29	15.26	15.31	16.08	16.13	16.04	15.91	15.89	15.95
AT2G45240	16.84	16.83	16.85	16.65	16.68	16.63	16.17	16.11	16.13	15.95	15.97	15.93
AT3G17240	16.74	16.66	16.72	16.54	16.49	16.52	16.32	16.3	16.31	16.18	16.16	16.23
AT1G32200	16.04	16.03	16.04	15.85	15.86	15.85	16.37	16.35	16.36	16.26	16.22	16.24
AT5G18200	16.12	16.09	16.17	15.99	15.92	15.93	16.84	16.7	16.8	16.56	16.52	16.56
AT1G27385	17.55	17.46	17.5	17.18	17.33	17.43	17.79	17.85	17.89	17.7	17.61	17.6
AT4G28770	14.42	14.43	14.39	14.37	14.04	14.26	14.34	14.53	14.31	14.45	14.24	14.33
AT3G61440	16.6	16.61	16.63	16.43	16.43	16.42	16.74	16.69	16.76	16.53	16.54	16.5
AT4G38220	16.5	16.49	16.47	16.32	16.31	16.29	16.36	16.35	16.41	16.36	16.33	16.33
AT3G57410	15.89	15.82	15.87	15.69	15.69	15.64	16.11	16.07	16.13	16	15.99	15.92
AT2G37220	15.47	15.39	15.45	15.26	15.29	15.24	15.2	15.16	15.21	15.07	15.06	15.05
AT3G19910	15.36	15.45	15.4	15.25	15.11	15.24	13.97	13.94	14.02	13.68	13.7	13.7
AT3G21100	14.82	14.75	14.94	14.66	14.75	14.56	14.94	14.92	14.98	14.82	14.82	14.85
AT1G24764	15.82	15.95	15.82	15.69	15.64	15.73	16.21	16.26	16.29	16.14	16.09	16.1
AT1G51630	16.8	16.82	16.85	16.66	16.69	16.58	16.95	16.98	16.91	16.85	16.8	16.86
AT1G36990	16.94	17	17	16.7	16.82	16.85	15.45	15.29	15.28	14.99	15.03	14.98
AT1G28600	15.21	15.26	15.24	15.07	14.99	15.09	17.08	17	17.15	16.89	17.02	16.89
AT1G26300	15.91	15.75	15.93	15.66	15.71	15.68	15.62	15.61	15.55	15.51	15.59	15.61
AT1G32780	15.18	15.17	15.24	15	14.99	15.07	15.31	15.4	15.41	15.24	15.14	15.24
AT4G29700	16.08	16.08	16.04	15.89	15.87	15.89	16.58	16.51	16.4	16.37	16.41	16.33
AT3G17900	15.86	15.84	15.9	15.68	15.67	15.7	16.11	16.08	16.11	16.11	16.06	16.09
AT3G29360	16.21	16.15	16.25	16.03	16.04	16.01	16.06	15.91	15.97	15.76	15.75	15.76
AT5G67130	15.06	15.01	15.02	14.77	14.85	14.91	15.24	15.38	15.38	15.33	15.18	15.33
AT4G37980	17	16.99	17.01	16.8	16.8	16.83	18.01	17.98	18.04	17.74	17.73	17.78
AT1G06560	16.55	16.43	16.48	16.29	16.33	16.27	15.39	15.41	15.5	15.4	15.4	15.35
AT1G77330	14.54	14.58	14.61	14.47	14.34	14.38	16.28	16.19	16.24	15.81	15.86	15.78
AT4G30840	16.1	16.08	16.08	15.97	15.8	15.95	15.21	15.16	15.03	14.92	14.9	14.91
AT2G35810	13.62	13.81	13.73	13.44	13.59	13.53	13.32	13.4	13.3	13.25	13.23	13.3
AT4G28300	15.55	15.61	15.66	15.47	15.42	15.4	16.53	16.52	16.52	16.47	16.47	16.49
AT1G47250	16.28	16.34	16.35	16.12	16.11	16.21	18.21	18	18.15	17.94	17.86	17.76
AT3G55470	16.19	16.1	16.09	15.93	15.92	15.99	15.79	15.84	15.86	15.65	15.73	15.68
AT4G24670	15.84	15.97	15.76	15.65	15.68	15.72	16.13	16.21	15.96	16.03	16.07	15.93
AT2G24270	15.7	15.71	15.73	15.54	15.55	15.51	15.6	15.6	15.62	15.46	15.45	15.49
AT1G66520	16.76	16.72	16.7	16.56	16.56	16.53	17.43	17.45	17.49	17.36	17.38	17.34
AT1G03280	16.79	16.74	16.8	16.62	16.56	16.6	15.62	15.75	15.69	15.47	15.54	15.52
AT1G75680	16.8	16.74	16.82	16.65	16.59	16.58	16.89	16.84	16.92	16.62	16.61	16.58
AT1G44820	16.09	16.03	16.09	15.9	15.87	15.89	16.29	16.27	16.32	16.14	16.11	16.09
AT4G35490	16.92	16.85	16.87	16.66	16.71	16.74	18.78	18.73	19.02	18.51	18.6	18.53
AT3G18690	16.48	16.18	16.26	16.13	16.14	16.11	15.53	15.51	15.56	15.38	15.48	15.28
AT3G04590	16.44	16.44	16.42	16.21	16.25	16.29	15.71	15.75	15.79	15.57	15.57	15.61
AT3G53020	18.81	18.67	18.79	18.61	18.61	18.51	18.74	18.69	18.77	18.84	18.89	18.78
AT5G63680	16.25	16.27	16.34	16.12	16.04	16.15	15.35	15.37	15.39	15.25	15.22	15.23
AT5G19050	15.76	15.71	15.74	15.6	15.5	15.57	16.04	16.07	16.1	15.87	15.83	15.91
AT5G23890	17.11	17.05	17.08	16.91	16.93	16.83	16.39	16.3	16.36	16.18	16.19	16.13
AT2G28290	15.78	15.8	15.8	15.61	15.6	15.62	15.68	15.61	15.66	15.57	15.55	15.57
AT5G03740	16.97	16.97	16.95	16.8	16.76	16.79	17.56	17.51	17.62	17.43	17.43	17.38
AT1G47900	15.56	15.5	15.54	15.35	15.34	15.37	15.77	15.77	15.81	15.64	15.65	15.69
AT4G34050	16.63	16.65	16.58	16.49	16.41	16.43	16.24	16.26	16.21	16.12	16.16	16.13
AT1G54860	17.02	16.93	16.87	16.76	16.81	16.71	16.1	16.12	16.13	16.04	16.02	15.96
AT3G55605	14.87	14.82	14.83	14.65	14.7	14.64	16	15.99	16.01	15.88	15.87	15.8
AT1G04710	14.09	14.04	14.05	13.88	13.83	13.92	14.35	14.47	14.43	14.25	14.22	14.28
AT4G22230	15.58	15.62	15.59	15.4	15.46	15.38	15.98	16.1	16.48	15.97	16.01	15.94
ATCG01060	15.83	15.84	15.82	15.63	15.68	15.67	16.1	16.06	16.13	15.97	15.97	15.94
AT5G64250	16.01	16	16.03	15.86	15.83	15.81	16.05	16.08	16.1	15.99	15.89	15.89
AT1G63940	16.69	16.7	16.72	16.52	16.54	16.51	16.06	16.01	16.08	15.97	15.98	15.96
AT3G52170	16.05	16.06	16.1	15.91	15.92	15.84	15.33	15.33	15.31	15.28	15.3	15.31
AT1G20840	15.45	15.43	15.46	15.25	15.26	15.3	16.72	16.68	16.59	16.63	16.66	16.73
AT2G23600	15.49	15.5	15.51	15.38	15.32	15.27	16.22	16.16	16.2	16.11	16.09	16.08
AT5G67560	16.64	16.76	16.89	16.71	16.52	16.5	15.35	15.33	15.5	15.53	15.22	15.43
AT1G64440	16.23	16.14	16.14	16.08	15.96	15.93	15.44	15.39	15.38	15.16	15.25	15.19
AT2G37500	16.38	16.34	16.38	16.17	16.2	16.19	15.79	15.77	15.82	15.62	15.56	15.51
AT4G31700	16.4	16.39	16.49	16.18	16.37	16.2	17.34	17.26	17.36	17.37	17.41	17.28
AT5G19370	16.15	16.08	16.12	15.95	15.96	15.9	16.6	16.62	16.7	16.51	16.51	16.46
AT5G43630	16.02	16.19	16.06	15.9	15.9	15.98	16.7	16.65	16.72	16.63	16.59	16.65
AT5G63980	16.44	16.46	16.48	16.28	16.32	16.25	16.29	16.28	16.25	16.08	16.1	16.1
AT5G35100	16.24	16.21	16.25	16.03	16.09	16.04	16.78	16.74	16.74	16.59	16.6	16.57
AT3G25220	15.71	15.55	15.62	15.54	15.44	15.37	17.16	17.1	17.17	17.08	17.05	16.96
AT3G15660	15.72	15.93	15.8	15.63	15.65	15.64	15.39	15.46	15.38	15.44	15.36	15.48
AT2G14720	14.52	14.6	14.52	14.35	14.43	14.34	15.23	15.21	15.19	14.99	15.16	15.04
AT5G51070	16.27	16.23	16.27	16.06	16.1	16.07	15.79	15.82	15.83	15.63	15.58	15.6
AT3G28460	16.19	16.16	16.19	15.98	16.01	16.01	16.06	16.05	16.05	16.11	16.02	16.05
AT3G25660	15.75	15.74	15.76	15.57	15.6	15.56	15.98	15.97	15.95	15.81	15.84	15.82
AT2G36485	14.81	14.9	14.96	14.79	14.61	14.74	16.44	16.43	16.42	16.28	16.35	16.2
AT5G63640	14.02	14.08	14.1	13.9	13.79	13.94	16.15	16.27	16.19	16.15	16.08	16.13
AT1G48920	16.59	16.53	16.56	16.37	16.38	16.33	17.14	17.14	17.18	17.01	17.05	17
AT5G19510	17.15	17.04	17.14	16.93	16.95	16.92	17.33	17.33	17.38	17.26	17.3	17.24
AT2G46280	16.74	16.67	16.74	16.53	16.58	16.51	16.42	16.36	16.4	16.18	16.21	16.17
AT4G23500	15.35	15.24	15.18	15.07	15.05	15.09	15.87	16.05	15.97	15.83	15.91	15.92
AT3G05180	14.83	15.11	14.97	14.74	14.89	14.76	15.32	15.38	15.43	15.19	15.27	15.36
AT3G09630	16.59	16.52	16.59	16.4	16.42	16.36	16.84	16.79	16.88	16.84	16.9	16.79
AT5G16840	16.06	15.93	15.92	15.81	15.82	15.75	16.77	16.71	16.72	16.49	16.47	16.48
AT2G16400	15.85	15.93	16.01	15.83	15.61	15.81	14.28	14.21	14.14	14.1	13.92	14.41
AT5G65960	15.5	15.51	15.51	15.34	15.35	15.3	15.94	15.89	16.02	16.03	15.96	15.93
AT2G17190	14.87	14.89	14.94	14.66	14.75	14.74	14.62	14.71	14.67	14.64	14.45	14.71
AT5G42560	16.57	16.7	16.65	16.59	16.42	16.38	16.13	16.02	16.19	16.07	16.09	16.05
AT4G34100	14.3	14.31	14.13	14.04	14	14.17	14	14.16	14.05	14.14	14.13	14.26
AT4G35785	16.32	16.15	16.29	16.09	16.02	16.1	15.49	15.41	15.48	15.31	15.29	15.31
AT5G54900	16.21	16.18	16.17	16.01	15.97	16.05	15.42	15.36	15.42	15.24	15.26	15.24
AT3G05410	16.16	16.27	16.18	16.05	16.02	16.04	17.29	17.27	17.38	16.99	17.01	17.03
AT5G41040	16.67	16.64	16.67	16.51	16.47	16.47	14.54	14.49	14.67	14.43	14.37	14.38
AT5G20630	17.11	17.04	17.13	16.91	16.93	16.9	17.96	17.96	18.05	17.72	17.82	17.68
AT2G25110	17.01	16.88	17.02	16.82	16.79	16.78	15.09	15.09	14.96	15.15	14.97	14.96
AT3G23940	16.21	16.23	16.23	16.04	16.04	16.07	16.34	16.35	16.39	16.27	16.26	16.26
AT3G23090	15.26	15.33	15.31	15.2	15.07	15.12	15.7	15.8	15.74	15.55	15.46	15.54
AT4G27780	14.63	14.58	14.6	14.43	14.46	14.4	16	15.91	15.95	15.92	15.91	15.89
AT5G66420	16.43	16.37	16.44	16.24	16.22	16.24	16.37	16.43	16.39	16.34	16.26	16.35
AT4G33540	16.53	16.6	16.67	16.42	16.5	16.37	15.26	15.27	15.17	15.1	14.98	15.06
AT5G09650	15.99	15.93	15.97	15.77	15.81	15.79	16.98	16.95	16.98	16.81	16.85	16.76
AT4G02720	16.64	16.61	16.64	16.47	16.44	16.48	15.09	15.22	15.26	15.23	15.21	15.06
AT4G12050	14.32	14.29	14.26	13.91	14.16	14.25	14.5	14.66	14.48	14.89	14.35	14.75
AT3G52640	16.97	16.84	16.91	16.77	16.78	16.69	16.51	16.39	16.47	16.33	16.41	16.37
AT5G16680	14.74	14.7	14.78	14.7	14.39	14.59	14.26	14.3	14.39	14.13	14.12	14.22
AT3G59920	16.46	16.42	16.44	16.28	16.3	16.23	17.77	17.72	17.76	17.61	17.66	17.65
AT3G16050	16.47	16.35	16.47	16.25	16.24	16.29	17.19	17.23	17.24	17.05	17.04	17.06
AT1G14380	15.63	15.63	15.66	15.43	15.5	15.47	15.78	15.73	15.78	15.75	15.76	15.72
AT5G11700	14.93	14.88	14.85	14.7	14.73	14.73	15.31	15.39	15.38	15.23	15.22	15.31
AT1G03900	14.69	14.75	14.76	14.59	14.63	14.5	15.7	15.61	15.65	15.45	15.41	15.48
AT1G55820	15.66	15.82	15.65	15.55	15.43	15.65	16.03	15.97	16.04	15.96	15.86	15.9
AT1G02305	17.18	17.19	17.11	16.98	16.93	17.04	16.09	16.1	16.02	15.97	15.81	15.86
AT3G13460	16.33	16.3	16.26	16.12	16.11	16.13	16.31	16.25	16.31	16.22	16.23	16.16
AT1G13060	17.47	17.3	17.4	17.22	17.19	17.26	15.2	15.42	15.49	15.38	15.27	15.45
AT1G09160	16.04	15.96	16	15.8	15.85	15.82	17.28	17.37	17.46	17.16	17.16	17.19
AT1G75950	16.2	16.18	16.11	15.95	15.97	16.06	16.39	16.34	16.23	16.2	16.01	16.44
AT3G08980	15.64	15.65	15.68	15.51	15.43	15.51	15.26	15.38	15.36	15.16	15.21	15.24
AT5G28540	16.39	16.36	16.31	16.24	16.13	16.16	15.28	15.21	15.28	15.16	15.16	15.17
AT1G10390	15.99	15.92	16	15.79	15.81	15.81	16.1	16.08	16.16	16.01	16.07	15.99
AT1G80240	15.96	15.87	15.92	15.76	15.76	15.72	16.63	16.63	16.61	16.38	16.36	16.34
AT3G63490	17.29	17.2	17.28	17.11	17.12	17.03	17.28	17.2	17.3	17.05	17.06	17.04
AT4G30780	14.86	14.93	14.8	14.74	14.71	14.64	14.73	14.62	14.67	14.55	14.4	14.56
AT1G17130	14.08	14.48	14.02	14.14	13.96	14.2	14.14	14.2	14.17	14.45	14.35	14.48
AT4G39660	16.1	16.09	16.05	15.89	15.91	15.92	16.12	16.11	16.15	16.04	16.01	16.03
AT1G10200	16.25	16.13	16.14	16.01	16.12	15.9	16.25	16.18	16.31	15.98	16.06	16.01
AT1G72750	15.44	15.44	15.37	15.23	15.25	15.23	15.49	15.55	15.38	15.36	15.3	15.36
AT3G49080	15.18	15.16	15.11	14.96	14.99	14.98	16	16	16.08	15.93	15.91	15.94
AT1G13750	15.85	15.84	15.85	15.69	15.67	15.67	15.06	15.17	15.04	15.09	15.08	14.98
AT3G52220	15.79	15.63	15.66	15.55	15.42	15.59	16.15	16.13	16.19	15.88	15.9	15.94
AT1G19570	16.75	16.71	16.75	16.61	16.55	16.55	16.73	16.73	16.78	16.47	16.51	16.57
AT5G08640	15.95	16.03	15.97	15.78	15.84	15.83	16.35	16.3	16.31	16.08	16.11	16.01
AT1G62640	15.81	15.89	15.93	15.72	15.69	15.72	15.95	16.02	15.97	15.92	15.84	15.83
AT1G16350	15.86	15.86	15.84	15.7	15.66	15.7	15.95	15.96	15.9	15.77	15.77	15.78
AT1G11260	15.95	15.99	15.91	15.76	15.8	15.77	16.24	16.15	16.18	16.1	16.13	16.1
AT4G37800	15.6	15.54	15.57	15.4	15.36	15.44	15.45	15.5	15.46	15.49	15.51	15.53
AT4G27960	16.93	16.85	16.99	16.74	16.82	16.7	16.94	16.9	16.98	17.01	16.97	17.09
AT4G25680	15.21	15.18	15.18	15.04	15.02	14.96	15.48	15.63	15.62	15.61	15.47	15.53
AT3G17668	15.5	15.49	15.43	15.32	15.26	15.34	15.66	15.57	15.62	15.41	15.45	15.4
AT1G69010	14.8	14.7	14.92	14.63	14.61	14.65	16.05	16.11	16.14	16.02	16.13	16.11
AT5G40370	15.99	16.03	16.01	15.82	15.88	15.84	16.09	16.02	16.13	15.87	15.85	15.81
AT5G23680	16.24	16.27	16.17	16.1	16	16.07	15.77	15.89	15.78	15.67	15.86	15.71
AT2G27030	17.17	17.05	17.09	16.97	16.96	16.87	17.42	17.34	17.36	16.87	16.84	16.83
AT1G16470	16.84	16.72	16.8	16.63	16.64	16.58	16.3	16.23	16.25	16.1	16.12	16.09
AT1G52410	15.45	15.31	15.41	15.22	15.25	15.2	15.62	15.57	15.65	15.46	15.44	15.42
AT1G10290	16.35	16.34	16.34	16.16	16.19	16.17	15.87	15.82	15.87	15.75	15.72	15.74
AT5G10860	16.36	16.28	16.3	16.14	16.17	16.12	16.26	16.21	16.21	15.81	15.87	15.84
AT5G64813	15.09	15.15	15.04	14.9	14.92	14.96	15.34	15.38	15.36	15.27	15.19	15.32
AT1G78060	15.76	15.79	15.77	15.61	15.57	15.62	16.36	16.32	16.35	16.13	16.14	16.17
AT3G63500	15.74	15.68	15.7	15.5	15.58	15.52	15.4	15.33	15.5	15.28	15.27	15.26
AT4G14570	16.77	16.68	16.73	16.57	16.57	16.54	15.86	15.77	15.9	15.75	15.76	15.66
AT1G79500	14.7	14.55	14.65	14.47	14.44	14.49	15.7	15.79	15.77	15.68	15.7	15.67
AT5G48480	17.04	16.95	16.98	16.83	16.85	16.8	16.53	16.52	16.54	16.33	16.36	16.29
AT2G27140	15.8	15.8	15.78	15.62	15.61	15.64	15.73	15.71	15.73	15.58	15.52	15.46
AT1G26640	16.51	16.52	16.53	16.34	16.32	16.4	16.13	16.04	16.01	15.78	15.86	15.86
AT3G16620	15.66	15.62	15.71	15.53	15.51	15.46	14.62	14.68	14.72	14.63	14.64	14.6
AT1G48630	16.44	16.47	16.33	16.23	16.18	16.33	15.79	15.74	15.74	15.61	15.59	15.61
AT5G64370	15.7	15.66	15.68	15.5	15.53	15.5	16.29	16.25	16.28	16.12	16.18	16.07
AT3G23980	16.61	16.6	16.57	16.42	16.39	16.47	16.28	16.28	16.3	16.16	16.16	16.14
AT1G54060	16.86	16.88	16.85	16.7	16.71	16.66	16.17	16.1	16.13	15.95	15.96	15.95
AT1G08500	15.98	15.81	15.93	15.91	15.74	15.56	16.32	16.31	16.34	16.13	16.2	16.17
AT1G61900	16.85	16.65	16.77	16.48	16.7	16.59	17.16	17.11	17.13	17.04	17	16.99
AT5G02850	14.66	14.58	14.53	14.46	14.35	14.45	15.3	15.2	15.24	15.12	15.14	15.17
AT4G12780	15.96	16.02	15.97	15.83	15.84	15.77	15.39	15.42	15.42	15.44	15.48	15.43
AT1G70940	14.84	14.76	14.76	14.61	14.62	14.65	16.08	16.05	16.09	16	15.93	15.99
AT1G30110	16.17	16.18	16.22	16.01	16.03	16.02	16.83	16.91	16.92	16.76	16.61	16.67
AT5G60920	16.55	16.41	16.5	16.32	16.32	16.33	16.35	16.33	16.44	16.14	16.16	16.22
AT3G59650	15.05	15	15.04	14.85	14.8	14.96	16.39	16.94	16.33	16.56	16.51	16.8
AT3G13560	15.78	15.77	15.85	15.64	15.59	15.65	16.08	16.08	16.07	15.97	15.92	15.89
AT5G08100	14.09	14.09	14.03	13.94	13.84	13.92	15.69	15.67	15.68	15.56	15.56	15.58
AT1G79090	14.92	14.94	14.83	14.71	14.65	14.83	15.3	15.31	15.37	15.4	15.4	15.43
AT3G16450	16.18	16.11	16.16	16	16.01	15.95	16.49	16.4	16.46	16.38	16.43	16.34
AT2G35370	16.38	16.4	16.43	16.25	16.25	16.24	16.97	16.93	17.02	16.83	16.78	16.84
AT5G63530	15.8	15.87	15.79	15.64	15.61	15.71	17.59	17.72	17.73	17.55	17.6	17.58
AT3G06050	17.2	17.15	17.2	17.04	17.03	16.98	17.21	17.16	17.19	16.97	17	16.9
AT4G24240	15.13	15.11	15.17	15.02	14.89	15.01	15.39	15.52	15.47	15.08	15.07	15.26
AT3G23710	16.02	15.91	15.98	15.77	15.84	15.79	17.11	17.1	17.12	17.14	17.09	17.14
ATCG00900	17.31	17.37	17.44	17.19	17.14	17.29	19.32	19.28	19.34	19	19.04	18.91
AT3G11820	15.46	15.49	15.48	15.34	15.29	15.34	15.76	15.75	15.87	16.19	16.17	16.14
AT5G16710	16.29	16.19	16.26	16.04	16.14	16.06	17.21	17.15	17.23	16.95	16.94	16.92
AT3G16470	17.01	16.96	16.98	16.83	16.85	16.77	17.2	17.12	17.22	17.06	17.06	17.01
AT5G40160	15.1	15	14.96	14.85	14.88	14.84	15.44	15.36	15.45	15.61	15.51	15.45
AT5G05740	16.21	16.12	16.16	16.03	16.03	15.95	15.91	15.9	15.84	15.71	15.79	15.69
AT5G61450	15.89	15.8	15.85	15.67	15.74	15.63	15.63	15.76	15.67	15.56	15.58	15.55
AT2G25430	15.64	15.64	15.68	15.52	15.51	15.42	15.94	16	16	15.95	15.89	16.02
AT3G04840	16.04	16.02	16.1	15.93	15.9	15.84	16.03	16	16.04	16.13	16.15	16.15
AT5G16620	16.2	16.1	16.16	15.97	16.02	15.98	15.89	15.85	15.93	15.8	15.84	15.78
AT5G51880	15.62	15.64	15.74	15.47	15.42	15.6	15.77	15.69	15.61	15.54	15.61	15.54
AT1G01730	15.78	15.76	15.89	15.7	15.6	15.62	15.61	15.63	15.66	15.48	15.51	15.5
AT5G50950	16.98	16.96	16.91	16.75	16.82	16.79	16.36	16.43	16.43	16.31	16.34	16.41
AT1G20810	16.39	16.41	16.38	16.22	16.2	16.28	15.7	15.66	15.56	15.49	15.44	15.45
AT3G11220	15.37	15.41	15.43	15.19	15.31	15.23	14.76	14.91	15	15.09	14.9	15.08
AT3G60900	16.49	16.29	16.41	16.21	16.3	16.19	17.16	17.06	17.08	16.73	16.9	16.95
AT2G27730	16.35	16.19	16.28	16.12	16.12	16.09	16.53	16.51	16.55	16.45	16.45	16.4
AT4G31200	15.92	16.11	15.93	15.88	15.8	15.79	15.94	15.87	16	15.76	15.8	15.77
AT3G15950	16.42	16.37	16.4	16.24	16.25	16.2	16.48	16.43	16.47	16.4	16.41	16.37
AT5G44380	16.22	16.11	16.2	15.99	16.03	16.01	16.59	16.55	16.62	16.45	16.51	16.39
AT4G04614	15.7	15.73	15.69	15.52	15.56	15.53	15.48	15.48	15.31	15.41	15.29	15.47
AT3G63190	16.98	17	17.06	16.92	16.8	16.83	15.47	15.48	15.52	15.17	15.2	15.14
AT3G32980	16.43	16.38	16.43	16.25	16.28	16.19	16.79	16.85	16.71	16.42	16.35	16.53
AT5G64680	16.07	15.96	16.06	15.89	15.84	15.76	14.76	14.77	14.83	14.85	14.49	14.68
AT3G19450	15.15	15.12	15.13	14.98	14.95	14.99	14.72	14.66	14.72	14.64	14.62	14.6
AT4G35580	16.35	16.28	16.34	16.1	16.21	16.17	14.29	14.43	14.27	14.34	14.23	14.55
AT4G08310	16.55	16.55	16.58	16.41	16.41	16.39	15.85	15.87	15.92	15.88	15.88	15.96
AT1G17100	15.29	15.26	15.29	15.09	15.12	15.1	15.24	15.15	15.26	15.08	15.09	15.09
AT4G39690	16.15	16.05	16.1	15.94	15.96	15.92	16.3	16.23	16.28	16.19	16.2	16.19
AT3G03330	16.69	16.61	16.58	16.45	16.49	16.47	17.08	17.06	17.17	17.06	17	16.85
AT5G43320	16	15.78	15.97	15.82	15.61	15.83	17.04	16.99	17.02	16.91	16.9	16.91
AT4G29120	16.73	16.64	16.71	16.51	16.56	16.54	16.28	16.35	16.3	16.22	16.23	16.23
AT3G62060	13.92	13.89	14	13.7	13.78	13.84	14.91	14.74	14.81	14.54	14.31	14.43
AT3G09670	16.68	16.68	16.68	16.5	16.51	16.54	15.65	15.63	15.66	15.59	15.57	15.56
AT4G23620	15.42	15.38	15.4	15.28	15.23	15.21	14.69	14.65	14.73	14.83	14.78	14.67
AT5G03420	16.29	16.17	16.2	16.03	16.1	16.07	16.82	16.78	16.81	16.64	16.66	16.61
AT1G04990	14.94	14.94	14.9	14.77	14.65	14.79	15.83	15.99	15.76	16.05	15.76	16.21
AT1G24020	16.87	16.82	16.83	16.67	16.72	16.64	16.71	16.58	16.67	16.46	16.47	16.49
AT1G79530	16.92	16.88	16.91	16.75	16.76	16.71	16.88	16.84	16.86	16.69	16.7	16.7
AT1G73200	14.04	13.94	13.91	13.87	13.75	13.8	15.13	15.07	15.12	15.01	14.85	14.74
AT3G54660	16.87	16.81	16.85	16.72	16.67	16.66	17.05	17.04	17.06	16.97	16.94	16.91
AT1G48030	15.21	15.16	15.23	15.03	15.03	15.03	15.87	15.77	15.87	15.67	15.65	15.63
AT5G47780	16.13	16.31	16.22	16.05	16.12	16.02	15.65	15.77	15.74	15.6	15.58	15.55
AT1G11860	16.85	16.77	16.85	16.65	16.7	16.63	16.91	16.86	16.93	16.72	16.74	16.68
AT5G57490	17.47	17.45	17.56	17.34	17.3	17.36	15.78	15.78	15.77	15.69	15.63	15.66
AT5G20600	14.67	14.73	14.77	14.56	14.64	14.49	15.39	15.4	15.34	15.43	15.5	15.41
AT5G66720	15.32	15.31	15.32	15.13	15.2	15.13	15.82	15.78	15.82	15.62	15.63	15.57
AT2G19710	14.57	14.78	14.74	14.56	14.61	14.52	14.49	14.67	14.5	14.5	14.4	14.6
AT4G30600	16.43	16.38	16.44	16.29	16.25	16.23	16.34	16.38	16.38	16.23	16.2	16.22
AT1G30460	14.51	14.62	14.5	14.46	14.27	14.43	15.02	15.13	14.96	15.2	15.13	15.24
AT2G46800	16.59	16.61	16.55	16.37	16.5	16.43	16.19	16.14	16.23	16.08	16.05	16.15
AT1G04520	16.31	16.44	16.47	16.2	16.2	16.34	15.46	15.56	15.53	15.57	15.44	15.51
AT1G20010	15.99	15.99	16.03	15.82	15.88	15.84	16.46	16.46	16.55	16.47	16.44	16.49
AT2G30950	15.51	15.45	15.47	15.34	15.32	15.3	15.62	15.62	15.63	15.59	15.55	15.55
AT5G65780	14.77	14.7	14.73	14.57	14.6	14.55	15.96	15.84	15.86	15.74	15.76	15.75
AT2G40765	15.51	15.47	15.55	15.36	15.37	15.32	15.96	16.02	16.07	15.91	15.86	15.93
AT1G23310	15.82	15.78	15.83	15.63	15.67	15.65	16.15	16.07	16.16	16.03	16.07	16.05
AT4G29440	15.26	15.39	15.28	15.18	15.11	15.16	15.94	16.04	15.98	15.93	15.85	15.94
AT1G70570	16.17	16.17	16.14	16.04	16.01	15.97	17.27	17.28	17.34	17.13	17.11	17.11
AT1G73080	16.46	16.45	16.4	16.28	16.27	16.29	16.16	16.13	16.14	16.12	16.06	16.07
AT5G63400	16.19	16.11	16.2	16.02	16.07	15.92	16.39	16.46	16.43	16.18	16.19	16.27
AT3G19620	14.96	14.97	14.99	14.86	14.82	14.77	15.16	15.59	15.1	15.45	15.12	15.55
AT4G21090	15.26	15.21	15.28	15.03	15.12	15.15	15.57	15.5	15.63	15.52	15.45	15.43
AT4G16120	16.46	16.48	16.48	16.27	16.34	16.33	15.93	15.96	15.95	15.81	15.77	15.83
AT3G04470	16.12	16.02	16.1	15.91	15.93	15.94	15.83	15.87	15.88	15.79	15.85	15.86
AT5G14720	14.67	14.69	14.68	14.51	14.51	14.54	15.29	15.32	15.22	15.28	15.21	15.26
AT2G24940	16.83	16.68	16.75	16.59	16.6	16.6	17.89	17.78	17.89	17.64	17.7	17.62
AT5G08170	16.23	16.29	16.08	16.13	15.97	16.05	14.47	14.38	14.59	14.25	14.25	14.27
AT2G19540	15.46	15.44	15.44	15.33	15.23	15.31	15.16	15.18	15.25	15.04	15.02	15.06
AT5G55130	16.25	16.33	16.33	16.18	16.08	16.2	16.28	16.32	16.36	16.22	16.22	16.18
AT5G03905	14.85	14.73	14.86	14.61	14.67	14.69	17.44	17.37	17.41	17.16	17.22	17.14
AT1G31010	15.06	15.05	15.03	14.95	14.87	14.89	13.91	13.69	13.95	13.65	13.79	13.42
AT3G22660	15.58	15.51	15.59	15.41	15.4	15.4	16.02	16.09	16.01	16.04	15.98	16.01
AT4G17050	15.25	15.22	15.14	15.07	15.03	15.07	14.18	14.35	14.26	14.15	14.06	14.21
AT5G42020	16.14	16.15	16.19	16.04	15.99	16	16.13	15.99	16.05	16.02	16.05	15.91
AT5G15350	16.91	16.97	16.97	16.79	16.81	16.77	18.24	18.09	18.26	17.94	17.92	17.87
AT1G11360	15.62	15.69	15.73	15.5	15.56	15.5	15.53	15.52	15.49	15.59	15.55	15.51
AT1G52060	16.38	16.3	16.28	16.19	16.16	16.15	14.96	14.96	15.01	14.79	14.75	14.87
AT1G75780	15.79	15.86	15.77	15.68	15.66	15.6	16.71	16.64	16.64	16.43	16.53	16.73
AT3G19420	15.87	15.89	15.87	15.7	15.73	15.72	16.65	16.58	16.62	16.54	16.55	16.49
AT5G39320	14.62	14.58	14.67	14.42	14.5	14.48	14.88	14.94	14.96	14.66	14.75	14.78
AT1G06070	14.42	14.49	14.52	14.34	14.21	14.42	14.75	14.7	14.65	14.74	14.62	14.69
AT1G72480	16.54	16.51	16.45	16.36	16.28	16.4	16.79	16.82	16.8	16.94	16.75	16.93
AT4G17830	16.25	16.27	16.25	16.1	16.11	16.1	16.36	16.31	16.34	16.17	16.21	16.14
AT5G20920	16.96	16.9	16.97	16.8	16.79	16.78	16.65	16.65	16.68	16.81	16.8	16.81
AT4G26455	15.1	15.04	15.11	14.93	14.91	14.97	15.22	15.12	15.14	14.9	15.04	15.11
AT4G01690	15.84	15.84	15.84	15.66	15.67	15.72	16.67	16.63	16.68	16.48	16.51	16.45
AT4G34230	16.27	16.22	16.3	16.12	16.11	16.11	16.52	16.51	16.62	16.46	16.41	16.42
AT1G07170	16.12	15.99	16.13	15.93	15.96	15.9	16.75	16.66	16.72	16.54	16.53	16.49
AT3G51800	16.83	16.72	16.8	16.64	16.65	16.6	17.17	17.12	17.19	17.06	17.1	17.04
AT2G27470	14.87	14.72	14.82	14.62	14.58	14.74	16.55	16.31	16.21	16.17	16.2	16.24
AT2G29340	16.66	16.58	16.7	16.46	16.53	16.52	16.96	16.92	17.04	16.88	16.91	16.92
AT2G30880	16.82	16.79	16.83	16.64	16.61	16.71	16.09	16.16	16.06	15.96	15.83	15.8
AT1G08680	15.58	15.52	15.52	15.41	15.41	15.33	15.68	15.68	15.78	15.64	15.67	15.62
AT1G07890	16.77	16.78	16.79	16.63	16.61	16.63	16.48	16.44	16.47	16.19	16.21	16.21
AT5G54160	16.75	16.66	16.7	16.55	16.56	16.54	15.78	15.78	15.81	15.62	15.64	15.63
AT1G33330	14.29	14.34	14.28	14.22	14.24	14	15.09	14.96	14.97	15.12	15.05	15.07
AT1G15290	15.45	15.44	15.43	15.3	15.3	15.28	15.66	15.64	15.65	15.68	15.62	15.68
AT1G29370	14.75	14.78	14.81	14.64	14.56	14.7	16.07	16.03	15.91	15.89	15.96	15.98
AT4G31530	16.47	16.44	16.52	16.33	16.34	16.31	16.48	16.48	16.55	16.31	16.29	16.26
AT3G47650	17.02	17.01	17.11	16.88	16.91	16.9	16.34	16.21	16.32	16.1	16.17	16.02
AT2G20960	16.36	16.19	16.41	16.17	16.15	16.19	15.55	15.66	15.63	15.54	15.6	15.57
AT1G43850	15.16	15.2	15.13	14.99	15.01	15.06	15.2	15.14	15.13	15.11	15.06	15.17
AT2G16640	16.16	16.07	16.1	15.96	15.97	15.94	14.89	14.97	14.91	14.81	14.74	14.81
AT5G20730	13.95	14.08	14.07	13.81	13.93	13.89	15.16	15.43	15.2	15.33	15.08	15.36
AT3G62830	16.38	16.4	16.34	16.23	16.21	16.24	14.87	14.84	14.75	14.76	14.67	14.76
AT5G41190	16.08	16.05	16.04	15.86	15.88	15.98	15.06	15.14	15.11	15.13	15.01	15.21
AT2G27260	16.05	15.94	15.9	15.69	15.89	15.86	15.55	15.31	15.61	15.53	15.46	15.49
AT3G56370	15.3	15.16	15.38	15.23	15.03	15.11	16.53	16.72	16.69	16.22	16.23	16.28
AT2G21870	15.99	16.04	15.89	15.91	15.79	15.83	15.28	15.32	15.29	15.03	15.13	15.07
AT5G19550	16.38	16.41	16.44	16.25	16.27	16.26	16.55	16.53	16.54	16.39	16.44	16.43
AT2G45710	19.21	19.08	19.21	19.08	18.99	18.98	19.03	19.02	19.04	18.84	18.85	18.81
AT3G60500	16.11	15.75	15.53	15.66	15.63	15.7	15.81	15.86	15.75	16.07	16.04	16.2
AT5G58480	14.47	14.31	14.34	14.06	14.34	14.25	16.6	16.44	16.43	16.5	16.39	16.49
AT3G14067	16.46	16.41	16.43	16.29	16.3	16.26	15.97	15.91	15.98	15.89	15.9	15.86
AT3G23820	15.32	15.3	15.27	15.15	15.11	15.21	16.11	16.11	16.2	15.99	16	15.94
AT4G23430	16.17	16.4	16.34	16.22	16.25	16	15.6	15.45	15.61	15.45	15.31	15.43
AT2G32240	16.21	16.19	16.2	16.06	16.06	16.03	16.61	16.54	16.62	16.37	16.4	16.34
AT2G27600	16.51	16.48	16.51	16.33	16.38	16.34	16.32	16.24	16.32	16.13	16.11	16.13
AT3G19650	16.31	16.25	16.32	16.11	16.18	16.14	16.55	16.49	16.56	16.38	16.49	16.38
AT1G52780	16.07	16.04	15.99	15.87	15.88	15.9	15.92	16.01	15.94	15.91	15.89	15.91
AT2G46370	16.83	16.9	16.83	16.71	16.69	16.71	16.83	16.93	16.84	16.67	16.67	16.62
AT5G09390	16.19	16.15	16.18	16.04	15.98	16.05	16.42	16.34	16.56	16.36	16.32	16.34
AT1G28440	14.63	14.61	14.57	14.48	14.39	14.49	14.7	14.78	14.79	14.44	14.39	14.45
AT1G04410	16.8	16.77	16.76	16.65	16.58	16.64	16.73	16.73	16.74	16.57	16.57	16.55
AT1G30230	15.91	15.83	15.82	15.66	15.73	15.73	16.23	16.23	16.25	16.15	16.15	16.13
AT1G79070	13.94	13.95	13.98	13.9	13.66	13.87	15.49	15.55	15.5	15.7	15.79	15.71
AT2G47510	16.24	16.2	16.24	16.08	16.07	16.09	16.31	16.26	16.32	16.18	16.18	16.19
AT1G51450	14.51	14.81	14.61	14.5	14.5	14.52	15.24	15.28	15.27	15.51	15.32	15.47
AT5G08570	15.74	15.65	15.65	15.53	15.55	15.53	16.29	16.31	16.3	16.31	16.29	16.29
AT2G32700	16.01	16	15.95	15.85	15.88	15.77	15.82	15.88	15.88	15.99	16.04	16
AT3G02875	16.32	16.31	16.39	16.21	16.18	16.17	16.24	16.1	16.21	16.03	16	16.07
AT5G03415	13.31	13.01	13.36	12.92	13.12	13.2	15.2	14.96	15.13	15.25	15.04	15.37
AT3G03100	17.13	17.04	17.06	16.97	16.98	16.85	16.97	17.03	17.03	17.07	17.04	17
AT4G31580	14.52	14.63	14.54	14.4	14.36	14.48	15.46	15.5	15.6	15.55	15.42	15.58
AT3G25860	16.04	15.99	16.04	15.9	15.88	15.86	16.36	16.3	16.38	16.26	16.3	16.26
AT5G35080	16.64	16.73	16.69	16.51	16.56	16.57	16.68	16.64	16.64	16.49	16.54	16.54
AT3G09410	16.64	16.63	16.7	16.54	16.43	16.54	17.33	17.28	17.36	16.93	17.04	16.96
AT1G13900	15.92	15.95	15.9	15.8	15.79	15.75	16.58	16.51	16.59	16.45	16.45	16.52
AT2G32590	14.99	15.19	15.14	15	14.96	14.93	14.86	14.84	14.85	14.72	14.69	14.81
AT4G20760	16.14	16.18	16.16	16.04	15.98	16.04	17.48	17.34	17.46	16.91	16.9	16.9
AT2G31390	16.71	16.62	16.68	16.51	16.55	16.51	16.74	16.74	16.73	16.49	16.45	16.47
AT4G39710	14.96	14.98	15.05	14.86	14.86	14.83	15.11	15.08	15.13	14.88	14.97	14.94
AT5G07970	15.83	15.9	15.95	15.81	15.67	15.76	15.36	15.37	15.39	15.21	15.28	15.1
AT1G63180	15.26	15.32	15.42	15.12	15.31	15.11	16.08	16.06	16.14	15.92	15.92	15.87
AT3G55750	16.43	16.39	16.41	16.27	16.23	16.29	16.47	16.46	16.47	16.6	16.56	16.54
AT4G30996	15.73	15.87	15.87	15.63	15.65	15.74	15.26	15.27	15.32	15.25	15.34	15.22
AT5G62300	16.9	16.92	16.91	16.74	16.79	16.75	17.13	17.22	17.21	17.1	17.16	17.17
AT2G05580	16.46	16.36	16.43	16.27	16.36	16.2	19.09	18.98	19.05	18.54	18.6	18.44
AT4G36910	15.47	15.38	15.48	15.25	15.27	15.36	16.14	16.15	16.19	16.05	16.12	16.06
AT1G62660	15.93	15.87	15.93	15.78	15.75	15.76	16.67	16.66	16.61	16.59	16.58	16.57
AT1G18630	16.86	16.85	16.89	16.73	16.72	16.71	17.39	17.3	17.39	17.27	17.37	17.31
AT5G23120	15.06	15.04	15.01	14.91	14.9	14.86	15.83	15.8	15.8	15.74	15.72	15.78
AT2G23810	17.17	17.1	17.11	16.95	17.03	16.93	17.35	17.14	17.24	17.11	17.17	17.06
AT2G35010	17.74	17.68	17.77	17.59	17.63	17.52	16.28	16.24	16.28	16.24	16.2	16.24
AT5G60540	16.33	16.23	16.25	16.09	16.14	16.15	16.4	16.38	16.4	16.26	16.3	16.28
AT4G13850	15.53	15.43	15.48	15.34	15.32	15.34	15.7	15.73	15.69	15.66	15.68	15.69
AT4G24770	15.4	15.45	15.42	15.28	15.27	15.28	15.61	15.68	15.64	15.59	15.53	15.54
AT3G16170	16.21	16.19	16.19	16.09	16.04	16.03	16.31	16.3	16.3	16.33	16.26	16.21
AT4G04020	16.25	16.2	16.24	16.1	16.11	16.04	16.21	16.22	16.26	16.03	16.01	16.08
AT2G43810	17.01	16.96	16.99	16.87	16.8	16.86	17.89	17.83	17.86	17.6	17.66	17.48
AT3G07750	16.43	16.38	16.55	16.23	16.36	16.35	17.01	17.04	16.98	17.08	17.12	17.2
AT1G45688	16.16	16.22	16.18	15.98	16.06	16.09	16.57	16.55	16.66	16.51	16.54	16.65
AT1G43670	16.59	16.53	16.6	16.43	16.44	16.42	16.61	16.61	16.67	16.48	16.49	16.46
AT5G24070	15.13	15.22	15.18	15.08	15	15.02	14.55	14.65	14.5	14.6	14.55	14.78
AT1G03760	15.51	15.44	15.57	15.35	15.36	15.34	16.2	16.19	16.27	16.04	15.98	16.01
AT1G14060	16.67	16.6	16.64	16.53	16.47	16.45	16.68	16.73	16.81	16.75	16.7	16.66
AT1G32990	15.95	15.91	16	15.82	15.85	15.76	16.47	16.41	16.51	16	15.96	15.95
AT1G79920	15.22	15.23	15.22	15.11	15.04	15.1	15.1	14.98	15.07	14.96	14.92	14.84
AT5G42870	15.48	15.55	15.57	15.43	15.36	15.41	15.99	16.13	16.04	15.91	15.94	15.92
AT1G01750	15.74	15.72	15.76	15.55	15.62	15.62	15.92	15.89	15.99	15.64	15.42	15.69
AT5G66860	16.14	16.18	16.14	16.09	15.95	16	16.43	16.39	16.39	16.26	16.29	16.25
AT5G12940	16.26	16.26	16.25	16.1	16.09	16.14	17.48	17.44	17.49	17.2	17.25	17.22
AT2G21170	16.77	16.68	16.7	16.56	16.59	16.55	17.26	17.16	17.24	17.03	16.98	16.95
AT1G73180	16.01	16.03	16.05	15.88	15.91	15.85	15.34	15.29	15.26	15.35	15.25	15.34
AT1G48210	16.25	16.24	16.25	16.11	16.09	16.07	15.73	15.72	15.79	15.72	15.64	15.75
AT5G39570	15.98	16.01	15.98	15.81	15.8	15.82	15.95	15.92	15.95	15.85	15.88	15.92
AT3G48000	17.08	16.98	17.05	16.88	16.94	16.86	16.92	16.87	16.96	16.78	16.72	16.73
AT5G59730	15.59	15.64	15.66	15.45	15.53	15.48	15.27	15.25	15.23	15.25	15.23	15.21
AT3G63140	16.62	16.59	16.65	16.49	16.48	16.45	16.33	16.34	16.38	16.11	16.11	16.13
AT3G15000	16.86	16.88	16.85	16.73	16.74	16.71	15.85	15.82	15.84	15.75	15.79	15.84
AT3G52380	15.74	15.72	15.76	15.6	15.62	15.58	15.73	15.71	15.78	15.6	15.6	15.57
AT3G27160	15.88	15.77	15.81	15.66	15.69	15.68	15.34	15.46	15.56	15.15	15.28	15.24
AT4G17420	16.86	16.94	16.85	16.72	16.7	16.81	14.79	14.9	14.79	14.69	14.71	14.76
AT3G01480	16.14	16.1	16.12	15.99	16	15.96	16.38	16.36	16.38	16.23	16.17	16.18
AT2G29260	15.89	16.05	15.87	15.83	15.76	15.8	16.54	16.58	16.63	16.58	16.53	16.6
AT3G15090	15.48	15.46	15.5	15.36	15.34	15.32	16.38	16.47	16.39	16.39	16.3	16.36
AT3G23800	15.56	15.7	15.6	15.51	15.45	15.49	16.18	16.05	16.12	16.13	16.1	16.14
AT5G13120	15.15	15.17	15.1	15.03	14.98	14.98	15.86	15.85	15.9	15.68	15.69	15.68
AT5G45680	17.04	17.04	17.07	16.94	16.9	16.89	16.35	16.32	16.41	16.24	16.28	16.21
AT4G34200	16.38	16.42	16.41	16.3	16.25	16.25	16.99	16.95	17.02	16.86	16.88	16.81
AT2G47110	16.76	16.68	16.71	16.56	16.61	16.54	16.2	16.11	16.16	16.11	16.15	16.11
AT3G15680	15.34	15.36	15.42	15.23	15.18	15.27	16.41	16.36	16.43	16.47	16.34	16.39
AT1G33790	15.89	15.95	15.91	15.75	15.81	15.78	16.08	16.07	16.09	16.08	16.05	16.03
AT5G11770	17.38	17.34	17.36	17.2	17.27	17.18	18.23	18.07	18.19	18.03	18.05	17.96
AT2G36460	15.96	15.86	15.91	15.74	15.78	15.79	15.94	15.89	15.93	15.68	15.66	15.68
AT5G14170	14.64	14.67	14.6	14.5	14.52	14.46	15.58	15.53	15.56	15.72	15.7	15.7
AT3G26770	14.9	14.87	14.83	14.73	14.73	14.71	15.75	15.75	15.78	15.68	15.5	15.67
AT2G22170	15.39	15.33	15.29	15.21	15.22	15.15	15.58	15.57	15.65	15.4	15.41	15.44
AT4G33580	16.37	16.33	16.39	16.23	16.24	16.22	16.24	16.22	16.24	16.07	16.02	16.06
AT1G30470	16.03	16.02	16.08	15.91	15.93	15.88	16.23	16.17	16.22	16.16	16.15	16.14
AT5G57290	15.04	15.12	15.09	14.92	14.95	14.93	14.35	14.3	14.28	14.24	14.2	14.24
AT5G42960	17.21	17.22	17.24	17.07	17.09	17.1	16.94	16.87	16.96	16.72	16.72	16.72
AT4G34460	16.02	16.03	16.04	15.91	15.88	15.89	16.35	16.26	16.31	16.21	16.13	16.13
AT2G32090	14.77	14.58	14.73	14.49	14.63	14.55	15.24	15.21	15.21	15.19	15.07	15.19
AT5G02240	16.23	16.2	16.18	16.06	16.06	16.07	16.49	16.43	16.52	16.09	16.07	16.04
AT1G06430	16.62	16.48	16.57	16.44	16.43	16.39	15.92	15.91	15.96	15.82	15.93	15.82
AT4G08780	15.08	15.05	15.15	14.98	14.82	15.06	15.14	15.22	14.99	15.14	14.96	15.16
AT3G55010	15.64	15.58	15.61	15.49	15.48	15.47	16.42	16.37	16.41	16.26	16.24	16.14
AT3G27380	16.89	16.84	16.98	16.78	16.75	16.74	17.24	17.27	17.12	17.06	17.2	17.14
AT1G55080	15.25	15.44	15.31	15.22	15.21	15.14	15.41	15.59	15.48	15.08	15.09	15.12
AT2G43945	16.67	16.58	16.54	16.37	16.59	16.42	14.83	14.99	14.87	14.83	14.71	15
AT1G16460	16.56	16.51	16.58	16.44	16.4	16.4	16.45	16.4	16.51	16.23	16.21	16.27
AT4G12980	16.52	16.41	16.49	16.32	16.38	16.3	15.37	15.36	15.39	15.2	15.17	15.24
AT1G28660	16	16.01	16.06	15.91	15.92	15.82	15.43	15.49	15.38	15.37	15.48	15.44
AT5G67590	15.79	15.7	15.75	15.6	15.66	15.57	17.38	17.27	17.35	17.2	17.25	17.2
AT1G29120	15.03	15.16	14.85	14.85	14.83	14.97	15.74	15.57	15.63	15.39	15.47	15.43
AT5G56500	16.28	16.26	16.33	16.15	16.14	16.16	16.02	15.99	16.01	15.79	15.72	15.7
AT3G63460	16.08	16.02	16.04	15.93	15.91	15.89	16.25	16.2	16.25	16.19	16.21	16.14
AT3G46900	15.91	15.69	15.84	15.75	15.64	15.64	15.2	15.47	15.39	15.44	15.5	15.57
AT2G36130	15.67	15.76	15.69	15.55	15.61	15.55	17.06	17.01	17.12	17.01	16.98	16.9
AT2G44860	15.7	15.65	15.7	15.52	15.53	15.59	16.19	16.2	16.18	16.31	16.33	16.24
AT5G22060	14.89	14.87	14.91	14.72	14.76	14.81	15.89	15.84	15.92	15.93	15.91	15.9
AT1G28200	16.26	16.28	16.33	16.15	16.16	16.16	16.25	16.14	16.2	15.86	15.94	15.85
AT4G28100	15.87	15.9	15.82	15.72	15.7	15.8	17.17	17.17	17.27	17.15	17.01	17.13
AT1G48120	14.29	14.19	14.37	14.14	14.12	14.19	14.75	14.97	14.9	14.88	14.7	14.96
AT5G20610	14.21	14.53	14.45	14.24	14.24	14.35	15.78	15.81	15.73	15.78	15.72	15.71
AT5G47870	16.05	16.08	16.03	15.92	15.93	15.9	15.97	15.85	15.92	15.78	15.77	15.74
AT5G66530	14.19	14.15	14.18	14.04	14.05	14.03	14.31	14.33	14.37	14.19	14.24	14.17
AT2G41040	15.96	16.09	15.95	15.94	15.87	15.77	15.99	15.92	16.03	15.85	15.88	15.83
AT5G48880	16.14	16.2	16.15	16.05	16.04	15.99	15.45	15.41	15.38	15.26	15.24	15.25
AT1G15470	14.76	14.76	14.75	14.58	14.66	14.58	14.99	14.9	14.92	14.81	14.75	14.78
AT1G53750	16.13	16	16.07	15.94	15.95	15.93	15.92	15.92	15.91	15.74	15.72	15.74
AT4G13350	16.71	16.71	16.72	16.57	16.58	16.57	15.88	15.79	15.85	15.68	15.7	15.7
AT3G07810	16.66	16.69	16.64	16.53	16.48	16.55	15.67	15.68	15.75	15.7	15.65	15.66
AT5G35370	15.25	15.19	15.23	15.12	15.11	15.06	13.52	13.2	13.28	13.07	13.1	13.17
AT1G53000	15.02	14.97	15	14.9	14.87	14.83	15.71	15.76	15.71	15.68	15.6	15.7
AT4G32410	15.58	15.59	15.56	15.43	15.46	15.45	15.76	15.75	15.74	15.79	15.78	15.81
AT1G07320	17.76	17.64	17.68	17.55	17.57	17.53	17.42	17.33	17.41	17.02	17.08	17
AT1G63610	15.69	15.8	15.71	15.57	15.59	15.65	15.05	15.25	15.17	15.56	15.44	15.61
AT3G47860	16.12	16.13	16.13	15.97	16.05	15.96	16.36	16.32	16.38	16.16	16.17	16.13
AT2G19940	15.74	15.69	15.74	15.58	15.6	15.58	16.16	16.09	16.13	15.96	15.97	16
AT3G14210	15.9	15.81	15.87	15.74	15.73	15.69	15.63	15.6	15.69	15.61	15.6	15.57
AT5G42240	17.12	17.08	17.17	17.04	16.96	16.95	17.56	17.5	17.6	17.47	17.49	17.48
AT1G73750	15.24	15.23	15.32	15.14	15.15	15.09	16.06	16.41	16.33	16.26	16.15	16.17
AT4G03520	16.74	16.69	16.71	16.58	16.61	16.55	17.19	17.1	17.16	16.93	16.98	16.92
AT1G45150	15.84	15.85	15.89	15.77	15.68	15.75	16.58	16.63	16.5	16.55	16.39	16.52
AT1G23820	16.18	16.08	16.12	15.99	16.03	15.97	17.29	17.32	17.33	17.18	17.26	17.21
AT4G22300	17.45	17.38	17.33	17.23	17.28	17.23	17.81	18.13	18.24	17.9	17.86	17.78
AT5G66030	15.87	15.78	15.89	15.67	15.77	15.68	15.61	15.67	15.71	15.76	15.65	15.82
AT1G35140	16.2	16.14	16.17	16.01	15.94	16.16	16.47	16.56	16.46	16.38	16.36	16.48
AT3G57560	16.76	16.7	16.74	16.56	16.6	16.64	17.97	17.92	18.03	17.83	17.87	17.68
AT1G16270	15.75	15.86	15.81	15.69	15.6	15.73	15.47	15.32	15.51	15.45	15.47	15.48
AT5G49720	16.48	16.37	16.43	16.25	16.35	16.28	17.19	17.07	17.17	16.88	16.97	16.84
AT3G45190	15.83	15.84	15.82	15.7	15.73	15.68	15.78	15.84	15.82	15.8	15.78	15.78
AT2G25950	15.58	15.55	15.6	15.52	15.45	15.36	15.79	15.83	15.93	15.83	15.71	15.73
AT5G65700	15.39	15.4	15.4	15.24	15.3	15.25	15.13	15.07	15.04	14.75	14.78	14.88
AT5G40510	14.25	14.3	14.42	14.28	14.1	14.21	16.53	16.47	16.51	16.22	16.23	16.25
AT4G32551	15.3	15.32	15.33	15.22	15.15	15.18	16.29	16.23	16.31	16.25	16.16	16.18
AT2G46780	15.16	15.2	15.24	15.06	15.06	15.08	16.64	16.6	16.59	16.6	16.53	16.59
AT1G09730	16.07	16.08	16.16	15.99	15.99	15.95	15.75	15.79	15.75	15.73	15.73	15.73
AT4G35060	15.16	15.17	15.11	15.05	15.04	14.96	15.85	15.78	15.86	15.6	15.69	15.62
AT1G53070	16.73	16.77	16.82	16.61	16.72	16.58	17.17	17.25	17.28	17.02	16.97	17
AT4G20890	16.32	16.32	16.39	16.2	16.17	16.24	16.66	16.52	16.64	16.36	16.49	16.51
AT5G14910	15.37	15.33	15.37	15.24	15.21	15.25	13.91	13.98	14.05	13.89	13.83	13.97
AT5G62680	14.3	14.25	14.31	14.12	14.18	14.16	15.89	15.89	15.87	15.58	15.71	15.62
AT5G14780	16.52	16.5	16.58	16.41	16.39	16.39	15.97	15.92	15.95	15.68	15.77	15.79
AT1G55370	16.47	16.5	16.55	16.41	16.43	16.29	15.17	15.38	15.15	15.31	15.21	15.57
AT1G64510	14.93	14.96	15.01	14.83	14.78	14.9	16.31	16.17	16.31	16.21	16.35	16.24
AT1G43620	14.36	14.31	14.36	14.11	14.23	14.3	15.73	15.74	15.8	15.8	15.71	15.74
AT4G10750	16.54	16.52	16.52	16.4	16.41	16.39	16.81	16.81	16.8	16.73	16.65	16.67
AT5G63990	14.86	14.85	14.83	14.69	14.73	14.73	16.9	16.93	16.9	16.92	16.82	16.89
AT3G59760	16.25	16.28	16.3	16.16	16.14	16.15	16.34	16.35	16.37	16.21	16.24	16.21
AT1G77630	14.92	15.01	15	14.86	14.78	14.91	15.27	15.24	15.26	15.05	15.08	15.16
AT3G14840	16.56	16.56	16.57	16.43	16.42	16.43	16.66	16.62	16.68	16.57	16.62	16.55
AT4G29350	15.51	15.58	15.65	15.38	15.45	15.52	16.81	16.84	16.9	16.58	16.64	16.6
AT5G16140	15.8	15.64	15.76	15.53	15.67	15.62	14.8	14.77	14.75	14.8	14.69	14.87
AT5G23420	15.21	15.21	15.13	15.02	15.08	15.08	15.69	15.84	15.86	15.81	15.69	15.66
AT5G46160	16.14	16.11	16.2	16.07	16.02	15.99	16.05	15.95	16.07	15.85	15.82	15.78
AT3G22290	16.1	16.13	16.1	15.92	16.01	16.03	15.73	16	15.86	15.88	15.76	16.1
AT3G18520	14.39	14.29	14.27	14.21	14.22	14.14	15.04	14.94	14.98	14.98	14.87	14.87
AT4G30140	16.9	16.88	16.88	16.78	16.71	16.78	16.7	16.65	16.72	16.53	16.51	16.59
AT2G43535	18.32	18.3	18.4	18.19	18.26	18.18	18.54	18.41	18.65	18.61	18.56	18.61
AT4G14440	15.73	15.47	15.68	15.5	15.61	15.48	14.24	14.59	14.4	14.33	14.36	14.59
AT5G14210	15.78	15.69	15.77	15.62	15.62	15.61	16.44	16.39	16.43	16.42	16.29	16.32
AT4G14040	15	14.97	14.96	14.83	14.8	14.91	15.57	15.61	15.65	15.63	15.67	15.77
AT2G21530	15.67	15.7	15.68	15.52	15.55	15.6	16	16.05	16.01	15.94	15.89	15.94
AT3G10920	15.47	15.48	15.47	15.32	15.34	15.38	16.47	16.47	16.5	16.42	16.36	16.44
AT5G13410	15.96	15.91	15.92	15.8	15.87	15.73	15.13	14.96	15.09	14.82	14.87	14.79
AT3G53230	15.43	15.45	15.47	15.37	15.26	15.33	15.25	15.27	15.3	15.09	15.16	15.12
AT3G05090	15.27	15.3	15.37	15.17	15.15	15.23	16.19	16.2	16.17	16.18	16.16	16.18
AT1G69030	16.07	16.08	15.98	15.98	15.93	15.83	16.34	16.29	16.35	15.99	15.93	16.03
AT2G38660	16.18	16.14	16.11	16.02	15.95	16.08	15.71	15.72	15.8	15.69	15.61	15.64
AT1G11820	14.63	14.72	14.71	14.57	14.5	14.6	15.42	15.38	15.35	15.25	15.23	15.3
AT3G14350	16.22	16.18	16.17	16.09	16.06	16.05	16.12	16.12	16.14	16.02	16.04	16.05
AT5G42070	16.93	16.78	16.93	16.77	16.75	16.74	15.36	15.3	15.27	15.11	15.15	15.19
AT3G11830	16.49	16.45	16.49	16.33	16.36	16.35	16.91	16.86	16.89	16.69	16.74	16.69
AT1G53730	17.15	17.05	17.14	17	17.05	16.91	16.55	16.63	16.61	16.47	16.45	16.49
AT1G75270	16.57	16.56	16.59	16.43	16.48	16.45	18.18	17.93	18.04	17.73	17.77	17.69
AT2G18370	17.52	17.34	17.39	17.22	17.39	17.25	16.61	16.58	16.57	16.65	16.82	16.77
AT1G55150	15.75	15.82	15.8	15.66	15.66	15.67	15.84	15.86	15.87	15.79	15.81	15.83
AT1G51580	15.21	15.29	15.25	15.19	15.08	15.1	16.41	16.36	16.4	16.37	16.38	16.3
AT2G36060	16.39	16.35	16.36	16.3	16.19	16.24	16.34	16.29	16.35	16.19	16.11	16.18
AT2G32580	15.67	15.58	15.73	15.54	15.49	15.57	16.47	16.54	16.52	16.53	16.47	16.56
AT5G12110	18.07	17.94	18.14	17.93	17.91	17.94	17.03	16.95	17.04	16.88	16.85	16.87
AT1G05140	14.38	14.45	14.46	14.25	14.37	14.32	15.1	15.1	15.11	15.12	15.16	15.05
AT1G76880	17.04	17.02	16.92	16.85	16.9	16.85	15.04	15.05	14.94	15.19	15.11	15.08
AT1G02880	14.78	14.61	14.69	14.58	14.54	14.58	16.05	16.11	16.02	15.94	15.91	16
AT1G21700	14.42	14.37	14.36	14.23	14.27	14.27	14.52	14.6	14.52	14.49	14.5	14.49
AT2G47470	16.67	16.58	16.64	16.48	16.53	16.49	16.95	16.92	16.96	16.66	16.71	16.7
AT2G30170	16.25	16.12	16.14	16.03	16.03	16.07	16.5	16.62	16.54	16.39	16.37	16.37
[truncated: 3,998 more rows]
