# Supplementary material
Source: Preprints.org preprint supplement (doi:10.20944/preprints202107.0372.v1)
Supplement: Supplementary file 7 [file Supplemental Table S3.xlsx]

## Sheet: Sheet1
Supplemental Table S3
The responsive proteins of col4 under salt stress.
gene	col4-fold change ratio	Mann-Whitney Test (p-value)	Log2Abundance-col4-mock-1	Log2Abundance-col4-mock-2	Log2Abundance-col4-mock-3	Log2Abundance-col4-NaCl-1	Log2Abundance-col4-NaCl-2	Log2Abundance-col4-NaCl-3
AT4G21960	0.519799	1e-05	16.12	16.06	16.21	15.14	15.17	15.21
AT4G12480	0.53372	0.00035	16.57	16.64	16.58	15.81	15.68	15.69
AT5G38930	0.55432	0.0039	15.14	15.21	15.04	14.27	14.17	14.36
AT4G37520	0.567201	1e-05	14.38	14.36	14.44	13.57	13.55	13.63
AT1G08930	0.600511	1e-05	16.27	16.14	16.21	15.57	15.41	15.43
AT4G12880	0.608362	0.00035	17.72	17.74	17.74	17.06	16.97	17.04
AT5G60360	0.613317	1e-05	18.41	18.29	18.34	17.64	17.68	17.71
AT4G37530	0.622332	1e-05	15.68	15.66	15.45	14.91	14.89	14.96
AT1G73260	0.62549	1e-05	17.8	17.7	17.76	17.07	17.13	17.06
AT1G28280	0.277963	0.0039	17.77	16.31	16.12	14.93	14.97	14.99
AT5G42180	0.356697	0.0039	16.81	16.73	16.79	15.23	15.31	15.33
AT2G38310	0.36356	0.00049	16.1	15.99	16.02	14.44	14.4	14.55
AT5G64120	0.393615	1e-05	16.48	16.44	16.45	15.12	15.13	15.09
AT4G30270	0.395215	1e-05	16.03	15.94	16.01	14.62	14.69	14.67
AT2G43620	0.395904	1e-05	15.4	15.33	15.35	13.92	14.11	14.03
AT2G38540	0.404092	1e-05	17.55	17.44	17.48	16.16	16.21	16.16
AT3G14240	0.419032	1e-05	16.97	16.96	17.05	15.79	15.7	15.72
AT5G19890	0.427808	0.00035	14.29	14.37	14.43	13.07	12.96	13.41
AT1G15270	0.430956	0.0039	16.88	16.97	16.8	15.67	15.63	15.74
AT5G57560	0.439613	1e-05	15.52	15.37	15.41	14.3	14.27	14.14
AT5G03610	0.454506	0.00035	16.33	16.17	16.31	15.12	15.12	15.15
AT1G56220	0.455956	0.0039	16.59	16.5	16.44	15.38	15.38	15.35
AT4G03210	0.462227	0.0039	17.56	17.45	17.38	16.43	16.55	16.02
AT2G41410	0.46276	1e-05	15.22	15.21	15.16	14.07	14.07	14.1
AT4G22470	0.464715	1e-05	17.22	17.32	17.21	16.19	16.15	16.04
AT1G28400	0.473526	0.0039	14.55	14.56	14.7	13.5	13.48	13.61
AT4G36430	0.481864	1e-05	15.51	15.59	15.51	14.5	14.45	14.48
AT2G37130	0.488437	1e-05	15.63	15.67	15.67	14.62	14.63	14.58
AT4G35770	0.489377	0.0039	18.3	18.24	18.29	17.28	17.2	17.25
AT3G22060	0.494267	1e-05	17.36	17.3	17.36	16.32	16.33	16.25
AT4G25260	0.50135	0.0039	16.28	16.37	16.2	15.3	15.16	15.41
AT4G30170	0.502304	1e-05	16.86	16.86	16.85	15.93	15.79	15.83
AT5G08000	0.503418	0.00035	17.38	17.31	17.3	16.37	16.36	16.29
AT2G43590	0.506432	1e-05	14.63	14.6	14.5	13.57	13.62	13.55
AT2G27660	0.51152	0.00035	16.68	16.64	16.73	15.75	15.7	15.7
AT3G46280	0.512508	1e-05	17.27	17.12	17.18	16.28	16.1	16.27
AT1G75800	0.513711	0.0039	16.44	16.37	16.3	15.49	15.29	15.45
AT3G30775	0.515524	0.00049	16.79	16.91	16.85	15.83	15.91	15.92
AT2G04570	0.519531	0.0039	16.5	16.36	16.49	15.52	15.45	15.56
AT5G64100	0.529426	1e-05	17.02	16.92	17	16.04	16.06	16.03
AT3G16370	0.533585	1e-05	17.47	17.42	17.41	16.49	16.54	16.54
AT5G25260	0.539629	1e-05	16.03	16.03	15.97	15.15	15.02	15.16
AT3G28040	0.545001	0.00035	15.95	15.98	15.98	15.18	15.06	15.13
AT5G19120	0.547805	1e-05	17.22	17.21	17.26	16.41	16.46	16.31
AT5G15180	0.552829	1e-05	16.4	16.38	16.35	15.55	15.48	15.5
AT1G17860	0.572625	1e-05	16.73	16.64	16.68	15.84	15.94	15.85
AT2G37710	0.573146	0.0065	15.3	15.19	15.17	14.54	14.24	14.47
AT1G30720	0.573832	1e-05	16.84	16.74	16.79	16.04	15.93	16.03
AT4G12470	0.574526	0.00035	15.79	15.83	15.88	14.98	15	15.11
AT2G22795	0.576176	1e-05	16.33	16.26	16.31	15.5	15.54	15.48
AT2G02850	0.591358	0.00035	16.12	16.09	16.09	15.32	15.31	15.38
AT1G06760	0.592537	1e-05	19.67	19.42	19.6	18.81	18.82	18.8
AT1G29670	0.596999	1e-05	15.76	15.75	15.76	15.05	14.97	15.01
AT5G49360	0.601023	1e-05	16.86	16.81	16.85	16.1	16.08	16.12
AT1G66180	0.60713	1e-05	15.93	15.69	15.78	15.12	15.05	14.97
AT3G18490	0.619347	1e-05	17.5	17.51	17.43	16.81	16.69	16.84
AT4G30020	0.619762	0.00035	13.92	14.05	14.09	13.4	13.26	13.33
AT5G39580	0.625402	1e-05	14.97	15.05	14.97	14.43	14.23	14.3
AT1G23130	0.628442	0.037	13.37	13.97	13.64	12.97	12.66	13.36
AT5G48540	0.630635	1e-05	15.26	15.12	15.13	14.51	14.56	14.44
AT3G12610	0.633891	1e-05	16.34	16.35	16.37	15.7	15.68	15.7
AT2G38530	0.640211	1e-05	17.01	16.89	17.06	16.31	16.39	16.33
AT4G16563	0.641803	0.00049	15.36	15.35	15.34	14.78	14.64	14.69
AT5G44610	0.596871	1e-05	15.76	15.86	15.72	15.05	15.01	15.06
AT4G39090	0.611605	1e-05	16.94	16.86	16.9	16.15	16.22	16.14
AT4G11650	0.662813	0.00035	15.31	15.14	15.17	14.64	14.62	14.58
AT1G10070	0.428284	1e-05	17.14	17.11	17.08	15.97	15.85	15.79
AT2G39460	0.477039	1e-05	17.59	17.43	17.51	16.41	16.51	16.41
AT3G24100	0.484574	0.0039	17.59	17.52	17.79	16.68	16.56	16.53
AT5G52810	0.500033	0.00035	17.04	16.97	17.04	16.04	16.03	15.99
AT4G13615	0.501902	0.00035	16.54	16.4	16.47	15.48	15.44	15.5
AT1G64370	0.51884	1e-05	18.09	18.01	18.13	17.06	17.13	17.21
AT1G12440	0.54798	0.0039	15.82	15.76	15.86	14.96	14.9	14.97
AT2G33830	0.566991	0.00035	15.37	15.31	15.29	14.54	14.48	14.47
AT3G10760	0.5713	0.0039	16.45	16.42	16.32	15.54	15.71	15.51
AT1G21500	0.57534	0.0039	15.9	15.76	15.87	15.02	15.06	15.04
AT4G14320	0.580953	1e-05	19.35	19.27	19.36	18.53	18.62	18.49
AT1G02360	0.590562	0.00035	15.67	15.57	15.72	14.91	14.94	14.9
AT1G21400	0.594631	1e-05	16.49	16.4	16.46	15.68	15.68	15.74
AT3G48340	0.600007	1e-05	15.42	15.41	15.33	14.59	14.64	14.71
AT1G06210	0.605656	0.0039	17.33	17.3	17.36	16.61	16.7	16.49
AT2G43520	0.610258	0.00035	15.57	15.56	15.65	14.86	14.84	14.95
AT4G12340	0.613763	0.0039	16.18	16.29	16.24	15.58	15.46	15.57
AT1G27210	0.618488	0.00035	15.36	15.43	15.44	14.69	14.7	14.75
AT3G52120	0.618929	0.0039	16.25	16.05	16.18	15.65	15.34	15.42
AT5G66170	0.621282	0.0039	16.27	16.33	16.32	15.64	15.52	15.7
AT5G64400	0.6222	1e-05	16.71	16.65	16.68	15.98	16.05	15.97
AT4G21620	0.623881	0.0039	16.37	16.33	16.3	15.67	15.76	15.51
AT1G80180	0.623919	1e-05	15.55	15.67	15.64	14.91	14.95	14.95
AT3G56340	0.628815	0.00035	16.73	16.78	16.67	16.04	16.09	16.03
AT2G19730	0.633192	1e-05	15.96	16.02	15.98	15.34	15.33	15.3
ATCG00065	0.633508	0.0039	18.8	18.65	18.68	18.07	18.07	18.02
AT5G17870	0.634115	0.01	18.69	18.38	18.72	17.82	17.89	18.1
AT5G01870	0.635272	0.00035	16.89	16.81	16.85	16.2	16.27	16.13
AT5G13630	0.636909	1e-05	16.4	16.41	16.4	15.77	15.73	15.76
AT3G54620	0.638859	1e-05	15.42	15.43	15.34	14.76	14.77	14.72
AT3G04630	0.640097	1e-05	15.13	15.04	15.13	14.38	14.49	14.51
AT1G19350	0.646898	1e-05	16.85	16.69	16.76	16.19	16.17	16.05
AT2G37080	0.646908	1e-05	15.87	15.89	15.85	15.22	15.23	15.28
AT3G45970	0.649853	1e-05	16.7	16.56	16.66	16.03	16	16.04
AT5G51890	0.649893	1e-05	15.87	15.89	15.93	15.3	15.19	15.31
AT2G31410	0.650864	0.00035	16.51	16.37	16.36	15.75	15.8	15.84
AT1G49740	0.655886	1e-05	15.05	15.12	15.18	14.52	14.45	14.55
AT1G54850	0.657212	0.0039	15.79	15.79	15.76	15.23	15.12	15.16
AT1G02890	0.657283	1e-05	15.59	15.45	15.64	14.97	14.87	15.03
AT4G35570	0.657625	1e-05	15.06	15.04	15.01	14.35	14.46	14.47
AT4G33420	0.659786	1e-05	15.69	15.72	15.7	15.14	15.06	15.08
AT3G23450	0.661607	1e-05	18.49	18.45	18.48	17.87	17.93	17.82
AT3G09000	0.662757	1e-05	16.3	16.2	16.26	15.65	15.71	15.62
AT4G33060	0.666245	0.00035	16.08	16.15	16.09	15.55	15.5	15.51
AT1G33960	0.404552	0.00035	16.5	16.41	16.4	15.14	15.1	15.21
AT3G43740	0.466056	0.0039	14.25	14.16	14.22	13.15	13.08	13.08
AT1G64390	0.486516	0.0039	15.64	15.54	15.7	14.69	14.55	14.51
AT5G64620	0.536971	0.00035	16.91	16.98	17.01	16.06	16.05	16.09
AT5G45670	0.556906	1e-05	15.98	16.01	15.92	15.13	15.07	15.18
AT2G44370	0.574309	0.0039	13.54	13.6	13.33	12.92	12.52	12.75
AT2G02990	0.57747	0.0039	14.93	14.99	14.95	14.04	14.02	14.36
AT1G04800	0.605889	0.00035	17.98	17.92	17.94	17.3	17.16	17.2
AT2G05790	0.61286	0.0039	14.29	14.32	14.04	13.59	13.39	13.54
AT4G38410	0.614265	0.0039	15.2	15.02	15.24	14.25	14.54	14.54
AT3G51950	0.62203	0.0039	16.11	16.08	16.03	15.33	15.29	15.53
AT2G42840	0.623527	0.0039	16.25	16.11	16.21	15.58	15.44	15.48
AT1G20160	0.63128	1e-05	15.61	15.7	15.66	14.98	14.95	15.04
AT3G50740	0.634071	0.0092	14.84	14.85	14.87	14.14	14.12	14.25
AT1G48300	0.635687	0.0039	14.79	14.82	14.81	14.14	14.02	14.27
AT3G09850	0.644418	0.0039	15.38	15.4	15.24	14.8	14.47	14.84
AT2G44380	0.648141	0.00035	13.92	13.95	14.08	13.34	13.36	13.38
AT4G30290	0.652793	0.0039	16.25	16.07	16.38	15.75	15.53	15.57
AT5G09978	0.662872	0.016	14.75	15.23	14.88	14.36	14.28	14.46
AT2G43710	1.50775	1e-05	15.3	15.23	15.32	15.88	15.89	15.91
AT5G65020	1.50935	1e-05	15.22	15.23	15.15	15.76	15.85	15.77
AT2G42590	1.5398	1e-05	16.14	16.04	16.13	16.69	16.78	16.7
AT1G78380	1.54387	1e-05	16.7	16.74	16.84	17.39	17.44	17.33
AT2G38760	1.54849	0.00093	13.36	13.69	13.45	14.09	14.14	14.2
AT1G35720	1.56461	1e-05	16.45	16.47	16.46	17.12	17.06	17.14
AT3G25520	1.59773	1e-05	15.09	15.11	15.05	15.73	15.79	15.75
AT1G53310	1.63279	1e-05	16.39	16.43	16.38	17.1	17.15	17.07
AT5G27470	1.63969	1e-05	16.61	16.52	16.64	17.3	17.35	17.27
AT4G23100	1.66089	1e-05	17.06	16.96	16.97	17.73	17.76	17.73
AT2G30870	1.66993	1e-05	15.96	16.01	15.97	16.72	16.75	16.7
AT5G47770	1.70327	1e-05	15	15.02	15	15.79	15.84	15.75
AT5G39740	1.72997	0.0039	15.87	15.75	15.68	16.58	16.62	16.46
AT2G38750	1.83684	1e-05	16.64	16.63	16.71	17.55	17.54	17.53
AT3G52340	1.5064	1e-05	16.39	16.36	16.41	16.98	17.01	16.94
AT5G27290	1.50757	0.01	14.92	15.07	15.15	15.7	15.51	15.72
AT1G09310	1.50759	1e-05	15.41	15.41	15.41	16.01	16.04	15.98
AT1G35340	1.50889	0.0039	14.83	14.88	14.9	15.47	15.55	15.37
AT3G28715	1.51308	1e-05	16.2	16.22	16.16	16.81	16.85	16.72
AT3G04830	1.51366	0.0039	14.85	14.94	14.81	15.44	15.42	15.54
AT5G49970	1.51472	1e-05	15.28	15.32	15.26	15.87	15.88	15.88
AT5G66090	1.51555	1e-05	15.63	15.61	15.55	16.16	16.2	16.22
AT5G22330	1.51928	1e-05	15.22	15.34	15.26	15.87	15.85	15.91
ATCG00670	1.51931	0.0039	15.64	15.62	15.62	16.17	16.28	16.24
AT2G27170	1.52054	1e-05	14.81	14.96	14.85	15.53	15.44	15.46
AT3G16260	1.52149	0.0039	16.42	16.52	16.46	17.11	17.06	17.05
AT5G51100	1.52315	1e-05	17.83	17.92	17.88	18.48	18.5	18.47
AT3G11630	1.52801	0.00035	16.07	16.05	16.11	16.64	16.77	16.64
AT2G46820	1.52928	0.00035	17.27	17.21	17.27	17.84	17.96	17.78
AT1G55890	1.53144	0.0039	16.09	16.22	16.03	16.68	16.7	16.79
AT1G78370	1.53215	1e-05	16.56	16.56	16.6	17.19	17.23	17.16
AT2G23390	1.53466	1e-05	14.7	14.79	14.71	15.34	15.38	15.33
AT4G17040	1.53628	1e-05	16.17	16.18	16.14	16.73	16.82	16.82
AT1G75990	1.53636	0.0039	15.55	15.55	15.61	16.06	16.3	16.18
AT5G43750	1.53637	1e-05	15.06	15.1	15.02	15.7	15.62	15.72
AT2G42600	1.53842	1e-05	16.11	16.17	16.14	16.77	16.76	16.76
AT4G35850	1.54081	1e-05	15.82	15.84	15.8	16.44	16.41	16.47
AT1G68790	1.54251	1e-05	14.95	15.06	14.88	15.59	15.54	15.66
AT1G48830	1.54817	1e-05	15.36	15.27	15.33	15.95	15.99	15.91
AT3G61990	1.55113	0.00081	15.13	15.36	15.02	15.95	15.53	15.8
AT1G04420	1.56053	1e-05	16.28	16.41	16.33	16.97	16.96	17.01
AT4G09720	1.56412	0.0039	14.42	14.57	14.56	15.26	14.95	15.29
AT1G60080	1.5707	0.0065	14.48	14.68	14.1	15.11	15	15.16
AT3G20330	1.57129	1e-05	16.61	16.68	16.61	17.27	17.29	17.29
AT1G73170	1.57215	1e-05	13.11	13.09	13.08	13.86	13.66	13.7
AT5G10450	1.57241	0.00035	14.85	14.89	14.83	15.44	15.49	15.58
AT2G25530	1.57637	0.0039	15.2	14.97	15.1	15.71	15.79	15.76
AT3G54890	1.57828	1e-05	17.05	16.97	17.08	17.66	17.76	17.67
AT1G02150	1.5888	1e-05	15.2	15.2	15.25	15.88	15.88	15.9
AT3G46630	1.59075	1e-05	15.91	15.84	15.95	16.63	16.59	16.49
AT5G46580	1.59352	1e-05	15.57	15.69	15.62	16.37	16.23	16.29
AT1G65410	1.596	0.00035	16.09	16.14	16.02	16.77	16.71	16.8
AT1G70760	1.59736	0.01	14.16	14.3	14.34	14.9	14.97	14.98
AT1G45000	1.60156	1e-05	16.16	16.13	16.17	16.83	16.81	16.85
ATCG00740	1.60312	1e-05	16.25	16.22	16.16	16.87	16.95	16.87
AT2G37400	1.6033	0.0039	14.38	14.2	14.16	14.96	14.72	15.1
AT4G34920	1.60627	1e-05	14.79	14.78	14.77	15.48	15.49	15.43
AT5G03160	1.60728	0.00035	14.62	14.75	14.7	15.42	15.35	15.35
AT5G48790	1.61142	0.0039	15.88	15.86	15.9	16.46	16.63	16.61
AT4G39040	1.61191	0.0039	13.04	12.98	13.04	13.75	13.58	13.77
AT1G19150	1.61605	0.00017	15.73	16.06	15.84	16.55	16.65	16.56
AT5G46070	1.62608	1e-05	15.75	15.73	15.71	16.46	16.4	16.42
AT5G15200	1.62772	1e-05	15.56	15.64	15.61	16.3	16.3	16.31
AT3G16000	1.62916	1e-05	15.53	15.54	15.59	16.25	16.26	16.29
AT4G08520	1.63074	0.00035	15.41	15.53	15.61	16.22	16.27	16.19
AT2G25830	1.63361	1e-05	16.38	16.37	16.37	17.09	17.12	17.05
AT5G19680	1.63389	0.0039	14.34	14.44	14.32	15.16	15.01	15.07
AT1G29930	1.66418	0.00035	15.58	15.72	15.59	16.35	16.25	16.36
AT4G01150	1.67988	1e-05	16.26	16.11	16.3	16.97	17.02	16.96
AT4G25100	1.69034	0.00035	16.17	16.02	16.12	16.82	16.95	16.86
AT3G62310	1.70731	0.0039	14.98	15.11	14.99	15.86	15.76	15.77
AT1G12410	1.71672	0.0039	14.57	14.4	14.31	15.2	15.18	15.25
AT4G02620	1.7392	0.0039	15.97	16.06	15.94	16.82	16.82	16.74
AT4G04640	1.7682	1e-05	16.4	16.27	16.36	17.18	17.19	17.16
AT2G27290	1.784	0.00035	14.79	14.85	14.9	15.72	15.63	15.7
AT3G18480	1.78829	0.0039	13.18	13.55	13.09	14.21	13.79	14.33
AT2G32500	1.79203	0.0039	14.18	14.1	13.95	15.04	14.77	14.95
AT3G13160	1.80966	0.00035	15.12	15.16	15.02	15.91	16.04	15.94
AT2G34430	1.82639	0.00067	14.4	14.42	14.42	15.24	15.24	15.2
AT3G05060	1.87355	1e-05	15.07	15.07	14.96	15.9	15.96	15.97
AT1G01770	1.90108	0.0039	12.03	12.29	11.91	13.04	12.51	13.36
AT2G23670	1.97111	0.00035	16.48	16.39	16.45	17.45	17.44	17.37
AT1G62780	1.97688	0.00035	14.77	15.02	14.92	15.87	15.89	15.92
AT3G52730	2.07685	0.00035	16.8	16.8	16.9	17.88	17.91	17.86
AT4G39510	1.51689	0.0039	13.83	14.34	13.83	14.53	14.5	14.8
AT5G64480	1.53441	0.0039	13.9	14.13	13.86	14.55	14.55	14.65
AT5G55990	1.54284	0.00035	14.18	14.1	14.25	14.83	14.7	14.88
AT2G04360	1.54473	0.0039	14.61	14.62	14.69	15.29	15.31	15.21
AT1G73650	1.5505	0.0039	17.75	17.6	17.66	18.3	18.35	18.25
AT3G58840	1.57726	0.0039	15.81	15.71	15.76	16.34	16.48	16.42
AT5G57300	1.58264	0.0039	14.5	14.56	14.51	15.26	15.09	15.21
AT2G40300	1.58864	0.0039	14.78	14.72	14.69	15.41	15.36	15.45
AT1G59600	1.59885	0.0017	13.76	13.81	13.86	14.47	14.47	14.58
AT2G01755	1.65362	0.00035	14.75	14.71	14.69	15.36	15.37	15.55
AT1G15390	1.81669	0.0039	14.08	14.15	14.06	14.98	15.02	14.87
AT5G23570	2.10402	0.01	12.86	12.77	12.86	13.73	13.63	13.54
