# Supplementary material
Source: Preprints.org preprint supplement (doi:10.20944/preprints202107.0372.v1)
Supplement: Supplementary file 9 [file Supplemental Table S4.xlsx]

## Sheet: Sheet1
Supplemental Table S4
The responsive proteins of hy2 mutant under salt stress.
gene	hy2-fold change ratio	Mann-Whitney Test (p-value)	Log2Abundance-hy2-mock-1	Log2Abundance-hy2-mock-2	Log2Abundance-hy2-mock-3	Log2Abundance-hy2-NaCl-1	Log2Abundance-hy2-NaCl-2	Log2Abundance-hy2-NaCl-3
AT1G15420	1.86794	0.025	15.9	16	16.14	16.82	16.8	17.07
AT1G77030	1.62465	0.00035	13.75	13.79	13.8	14.48	14.35	14.57
AT3G18420	1.56433	1e-05	16.22	16.04	16.18	16.82	16.77	16.79
AT5G59610	1.68005	0.00049	14.95	15.21	15.04	15.8	15.64	16.01
AT1G06720	1.60387	0.00035	15.45	15.71	15.32	16.24	16.04	16.26
AT4G21960	0.479553	1e-05	16.02	15.97	15.97	14.96	14.83	14.95
AT4G12480	0.426931	0.0039	17.69	17.64	17.65	16.45	16.55	16.25
AT5G38930	0.616826	0.0039	15.91	15.86	15.9	15.25	15.18	15.13
AT4G37520	0.605322	1e-05	15.88	15.77	15.88	15.15	15.04	15.17
AT1G08930	0.568241	0.00035	15.08	15	15.07	14.34	14.05	14.31
AT4G12880	0.658222	0.00035	17.95	17.87	17.92	17.3	17.39	17.25
AT5G60360	0.636139	1e-05	17.65	17.61	17.62	17.01	17.02	16.94
AT4G37530	0.615333	1e-05	15.42	15.36	15.43	14.71	14.66	14.71
AT1G73260	0.653084	1e-05	17.89	17.81	17.97	17.27	17.36	17.23
AT1G28280	0.466953	0.0039	16.07	15.98	15.95	14.92	14.74	15.03
AT5G42180	0.47033	1e-05	15.77	15.84	15.8	14.77	14.67	14.67
AT2G38310	0.301034	1e-05	16.61	16.45	16.56	14.93	14.54	14.77
AT5G64120	0.486834	1e-05	16.24	16.21	16.29	15.24	15.16	15.26
AT4G30270	0.341052	1e-05	17.42	17.41	17.4	15.82	15.84	15.79
AT2G43620	0.410341	1e-05	16.37	16.44	16.51	15.17	14.94	15.28
AT2G38540	0.456796	1e-05	17.81	17.82	17.81	16.68	16.61	16.72
AT3G14240	0.434036	1e-05	15.33	15.39	15.38	14.22	13.99	14.22
AT5G19890	0.24778	0.0039	14.3	14.31	14.43	11.98	12.33	12.31
AT1G15270	0.642364	0.0039	17.72	17.92	17.68	17.17	17.2	17.03
AT5G57560	0.485966	1e-05	17.78	17.79	17.74	16.72	16.8	16.7
AT5G03610	0.507515	1e-05	16.8	16.83	16.75	15.8	15.79	15.85
AT1G56220	0.580345	0.0039	16.27	16.26	16.35	15.54	15.49	15.45
AT4G03210	0.473587	0.00035	16.37	16.37	16.37	15.33	15.27	15.29
AT2G41410	0.500536	1e-05	15.96	16.01	16.06	14.91	15.03	15.05
AT4G22470	0.518583	1e-05	16.85	16.77	16.9	15.93	15.77	15.95
AT1G28400	0.413083	0.00035	15.37	15.35	15.39	14.06	14.08	14.14
AT4G36430	0.578789	0.00022	15.65	15.73	15.79	14.88	14.94	14.93
AT2G37130	0.585175	1e-05	16.22	16.2	16.25	15.42	15.46	15.47
AT4G35770	0.387283	0.0039	18.27	18.15	18.26	16.78	16.92	16.88
AT3G22060	0.500117	1e-05	17.62	17.59	17.65	16.57	16.61	16.66
AT4G25260	0.621808	0.00028	15.5	15.35	15.37	14.74	14.55	14.83
AT4G30170	0.534637	1e-05	16.15	16.09	16.17	15.27	15.19	15.21
AT5G08000	0.523221	1e-05	16.2	16.14	16.25	15.26	15.23	15.18
AT2G43590	0.485389	0.00049	15.13	15.22	15.33	14.22	14.12	14.22
AT2G27660	0.562014	0.00035	16.07	16.2	16.21	15.26	15.33	15.4
AT3G46280	0.563311	1e-05	18.15	18.05	18.2	17.33	17.31	17.27
AT1G75800	0.614514	0.0039	16.02	15.95	16.03	15.39	15.26	15.24
AT3G30775	0.58857	1e-05	15.74	15.69	15.8	14.99	14.95	14.97
AT2G04570	0.50379	0.0039	17.27	17.32	17.43	16.45	16.32	16.27
AT5G64100	0.577039	1e-05	17.55	17.54	17.58	16.77	16.77	16.74
AT3G16370	0.60305	1e-05	17.03	16.93	17.04	16.22	16.28	16.32
AT5G25260	0.418932	1e-05	16.99	16.98	16.96	15.75	15.68	15.72
AT3G28040	0.334758	0.0039	17.54	17.48	17.49	15.88	15.9	15.99
AT5G19120	0.483366	0.00035	15.66	15.92	15.81	14.8	14.69	14.73
AT5G15180	0.607457	1e-05	16.96	16.82	16.88	16.16	16.18	16.16
AT1G17860	0.614687	1e-05	15.56	15.57	15.58	14.87	14.86	14.85
AT2G37710	0.522697	0.0039	14.24	14.14	14.25	13.23	13.21	13.28
AT1G30720	0.513238	1e-05	16.82	16.76	16.82	15.85	15.8	15.87
AT4G12470	0.641563	0.00035	17.3	17.44	17.42	16.76	16.7	16.78
AT2G22795	0.636025	1e-05	16.45	16.33	16.42	15.78	15.76	15.69
AT2G02850	0.654088	0.00035	16.21	16.14	16.15	15.52	15.55	15.59
AT1G06760	0.660502	1e-05	18.42	18.25	18.4	17.72	17.67	17.86
AT1G29670	0.535672	1e-05	16.73	16.72	16.71	15.79	15.81	15.84
AT5G49360	0.638255	1e-05	16.58	16.56	16.58	15.93	15.95	15.91
AT1G66180	0.633823	1e-05	15.24	15.44	15.32	14.63	14.65	14.74
AT3G18490	0.592234	1e-05	17.41	17.39	17.41	16.65	16.62	16.69
AT4G30020	0.650281	0.0039	14.28	14.22	14.17	13.58	13.53	13.69
AT5G39580	0.487225	1e-05	14.41	14.45	14.4	13.44	13.26	13.47
AT1G23130	0.531134	0.0039	14.85	15.3	14.92	14.04	14.09	14.24
AT5G48540	0.642518	1e-05	17.97	17.83	17.91	17.21	17.32	17.25
AT3G12610	0.584531	1e-05	15.97	15.95	15.97	15.19	15.19	15.19
AT2G38530	0.55867	1e-05	16.91	16.86	16.94	16.08	16.08	16.02
AT4G16563	0.647069	0.00035	16.07	16.14	16.15	15.5	15.46	15.51
AT2G32060	0.580826	1e-05	17.12	17.06	17.09	16.3	16.32	16.3
AT3G13410	0.552531	0.0039	17.44	17.26	17.38	16.57	16.52	16.42
AT5G62350	0.657771	1e-05	15.52	15.35	15.42	14.85	14.85	14.8
AT2G18040	0.633122	1e-05	18.23	18.14	18.26	17.56	17.61	17.48
AT4G22505	0.539522	0.0039	17.5	17.42	17.5	16.53	16.64	16.6
AT1G28330	0.641545	1e-05	16.49	16.49	16.5	15.78	15.92	15.83
AT1G72970	0.66536	1e-05	17.38	17.38	17.41	16.83	16.84	16.76
AT1G75380	0.645285	0.00022	16.57	16.57	16.55	16.01	15.91	15.85
AT2G39210	0.646927	0.0039	15.5	15.43	15.48	14.8	14.89	14.83
AT3G05200	0.584869	0.0039	15.27	15.18	15.16	14.37	14.44	14.47
AT1G20850	0.645441	0.00035	16.72	16.7	16.8	16.07	16.18	16.09
AT3G59220	0.579425	1e-05	16.72	16.62	16.62	15.92	15.77	15.9
AT1G51850	0.648648	1e-05	16.04	16	16.06	15.43	15.38	15.43
AT2G18750	0.654302	0.00049	15.48	15.5	15.35	14.83	14.89	14.81
AT5G50200	0.498096	0.00035	16.13	16.36	16.07	15.25	15.13	15.3
AT1G66100	0.637955	0.0039	15.44	15.41	15.45	14.63	14.84	14.82
AT2G41100	0.540685	1e-05	18.87	18.71	18.84	17.94	17.95	17.85
AT4G35350	0.65499	0.00035	16.06	16.02	16.06	15.49	15.41	15.41
AT1G75040	0.607362	0.0039	16.98	16.95	17.03	16.24	16.27	16.3
AT5G23660	0.595023	0.00035	15.51	15.63	15.43	14.82	14.56	14.94
AT3G02730	0.666533	0.00035	18.28	18.2	18.27	17.7	17.66	17.65
AT5G28050	0.639088	0.00035	16.47	16.5	16.53	15.9	15.85	15.81
AT5G12140	0.587715	0.0039	15.85	15.71	15.66	15.04	14.71	15.13
AT1G07140	0.617822	1e-05	16.81	16.8	16.92	16.12	16.23	16.09
AT5G58590	0.551626	0.00035	15.75	15.71	15.76	14.97	14.75	14.91
AT4G15940	0.654208	1e-05	17.11	16.91	16.94	16.32	16.48	16.33
AT4G09650	0.66116	1e-05	16.63	16.55	16.61	16	16.02	15.97
AT4G25370	0.661375	1e-05	16.28	16.2	16.21	15.58	15.67	15.67
AT4G02530	0.602232	1e-05	18.28	18.11	18.2	17.45	17.51	17.43
AT1G65690	0.661173	0.0039	14.91	14.96	14.94	14.4	14.29	14.33
AT1G14540	0.616573	0.00067	15.78	15.75	15.68	14.96	14.91	15.2
AT1G15125	0.379901	0.0039	16.6	16.44	16.54	15.19	15.13	15.06
AT1G34510	0.608039	0.00035	15.45	15.52	15.5	14.79	14.84	14.8
AT1G74460	0.511585	0.0039	16.04	16.01	16.12	15.11	14.98	15.18
AT2G17230	0.555204	0.0039	16.58	16.66	16.72	15.82	15.71	15.82
AT2G28270	0.36713	0.0039	16.45	16.34	16.36	14.99	14.88	14.94
AT2G43510	0.63822	0.0039	15.2	15.1	15.18	14.57	14.41	14.56
AT3G23730	0.639745	0.0039	16.45	16.2	16.2	15.55	15.68	15.69
AT3G29240	0.506066	0.0039	15.5	15.54	15.59	14.45	14.5	14.71
AT3G49100	0.62682	0.0039	17.06	16.94	17.04	16.31	16.41	16.31
AT3G50480	0.421776	0.0039	15.03	14.93	15.08	13.85	13.59	13.84
AT3G59370	0.610326	0.0039	15.85	15.92	15.93	15.23	15.18	15.17
AT4G11320	0.321517	0.00035	16.87	16.78	16.81	15.15	15.04	15.17
AT4G32940	0.556251	1e-05	16.92	16.87	16.89	16.08	15.95	16.1
AT5G19090	0.641956	0.0039	15.71	15.6	15.7	15.04	15.06	14.98
AT5G23140	0.661198	1e-05	16.08	15.95	16.12	15.39	15.46	15.5
AT5G32450	0.5402	0.0039	15.12	15.07	14.92	14.2	14.07	14.19
AT5G58150	0.566849	0.00035	16.03	16.02	16.12	15.29	15.18	15.24
