# Supplementary material
Source: Preprints.org preprint supplement (doi:10.20944/preprints202107.0372.v1)
Supplement: Supplementary file 11 [file Supplemental Table S5.xlsx]

## Sheet: data
Supplemental Table S5
GO enrichment analysis of col4 specific quantified and response proteins under salt stress.
Tags	GO.ID	GO.Name	GO.Category	P.Value	Nr.Test	Nr.Reference	Non.Annot.Test	Non.Annot.Reference	SeqTest
[OVER]	GO:0004553	hydrolase activity, hydrolyzing O-glycosyl compounds	MOLECULAR_FUNCTION	0.0345532	3	169	28	7191	AT4G30290, AT2G05790, AT1G64390
[OVER]	GO:0004518	nuclease activity	MOLECULAR_FUNCTION	0.004413	3	77	28	7283	AT2G02990, AT5G23570, AT3G51950
[OVER]	GO:0005506	iron ion binding	MOLECULAR_FUNCTION	0.0082083	3	97	28	7263	AT4G39510, AT2G40300, AT1G15390
[OVER]	GO:0016651	oxidoreductase activity, acting on NAD(P)H	MOLECULAR_FUNCTION	0.004413	3	77	28	7283	AT2G44380, AT1G48300, AT2G44370
[OVER]	GO:0016798	hydrolase activity, acting on glycosyl bonds	MOLECULAR_FUNCTION	0.0392993	3	178	28	7182	AT4G30290, AT2G05790, AT1G64390
[OVER]	GO:0047134	protein-disulfide reductase activity	MOLECULAR_FUNCTION	0.000252742	2	4	29	7356	AT2G44380, AT2G44370
[OVER]	GO:0098771	inorganic ion homeostasis	BIOLOGICAL_PROCESS	0.022782	2	54	29	7306	AT5G55990, AT2G40300
[OVER]	GO:0050801	ion homeostasis	BIOLOGICAL_PROCESS	0.0292134	2	62	29	7298	AT5G55990, AT2G40300
[OVER]	GO:0090305	nucleic acid phosphodiester bond hydrolysis	BIOLOGICAL_PROCESS	0.037208	2	71	29	7289	AT2G02990, AT5G23570
[OVER]	GO:0004540	ribonuclease activity	MOLECULAR_FUNCTION	0.0132078	2	40	29	7320	AT2G02990, AT5G23570
[OVER]	GO:0004521	endoribonuclease activity	MOLECULAR_FUNCTION	0.00407771	2	21	29	7339	AT2G02990, AT5G23570
[OVER]	GO:0004519	endonuclease activity	MOLECULAR_FUNCTION	0.0114559	2	37	29	7323	AT2G02990, AT5G23570
[OVER]	GO:0090502	RNA phosphodiester bond hydrolysis, endonucleolytic	BIOLOGICAL_PROCESS	0.00278499	2	17	29	7343	AT2G02990, AT5G23570
[OVER]	GO:0090501	RNA phosphodiester bond hydrolysis	BIOLOGICAL_PROCESS	0.0114559	2	37	29	7323	AT2G02990, AT5G23570
[OVER]	GO:0015036	disulfide oxidoreductase activity	MOLECULAR_FUNCTION	0.0198203	2	50	29	7310	AT2G44380, AT2G44370
[OVER]	GO:0009813	flavonoid biosynthetic process	BIOLOGICAL_PROCESS	0.0283737	2	61	29	7299	AT2G02990, AT3G50740
[OVER]	GO:0009812	flavonoid metabolic process	BIOLOGICAL_PROCESS	0.0381432	2	72	29	7288	AT2G02990, AT3G50740
[OVER]	GO:0016667	oxidoreductase activity, acting on a sulfur group of donors	MOLECULAR_FUNCTION	0.0390875	2	73	29	7287	AT2G44380, AT2G44370
[OVER]	GO:0016668	oxidoreductase activity, acting on a sulfur group of donors, NAD(P) as acceptor	MOLECULAR_FUNCTION	0.00196975	2	14	29	7346	AT2G44380, AT2G44370
[OVER]	GO:0055065	metal ion homeostasis	BIOLOGICAL_PROCESS	0.0144366	2	42	29	7318	AT5G55990, AT2G40300
[OVER]	GO:0055080	cation homeostasis	BIOLOGICAL_PROCESS	0.0191074	2	49	29	7311	AT5G55990, AT2G40300
[OVER]	GO:2000122	negative regulation of stomatal complex development	BIOLOGICAL_PROCESS	0.0166753	1	3	30	7357	AT1G20160
[OVER]	GO:0006641	triglyceride metabolic process	BIOLOGICAL_PROCESS	0.0411847	1	9	30	7351	AT1G48300
[OVER]	GO:0006638	neutral lipid metabolic process	BIOLOGICAL_PROCESS	0.0411847	1	9	30	7351	AT1G48300
[OVER]	GO:0006639	acylglycerol metabolic process	BIOLOGICAL_PROCESS	0.0411847	1	9	30	7351	AT1G48300
[OVER]	GO:0019932	second-messenger-mediated signaling	BIOLOGICAL_PROCESS	0.0208018	1	4	30	7356	AT5G55990
[OVER]	GO:0030245	cellulose catabolic process	BIOLOGICAL_PROCESS	0.0290048	1	6	30	7354	AT1G64390
[OVER]	GO:2000038	regulation of stomatal complex development	BIOLOGICAL_PROCESS	0.0330813	1	7	30	7353	AT1G20160
[OVER]	GO:0006743	ubiquinone metabolic process	BIOLOGICAL_PROCESS	0.0411847	1	9	30	7351	AT5G57300
[OVER]	GO:0006744	ubiquinone biosynthetic process	BIOLOGICAL_PROCESS	0.0411847	1	9	30	7351	AT5G57300
[OVER]	GO:0004144	diacylglycerol O-acyltransferase activity	MOLECULAR_FUNCTION	0.0166753	1	3	30	7357	AT1G48300
[OVER]	GO:0043686	co-translational protein modification	BIOLOGICAL_PROCESS	0.00837155	1	1	30	7359	AT1G15390
[OVER]	GO:0047209	coniferyl-alcohol glucosyltransferase activity	MOLECULAR_FUNCTION	0.00419429	1	0	30	7360	AT3G50740
[OVER]	GO:0047218	hydroxycinnamate 4-beta-glucosyltransferase activity	MOLECULAR_FUNCTION	0.00837155	1	1	30	7359	AT3G50740
[OVER]	GO:0019722	calcium-mediated signaling	BIOLOGICAL_PROCESS	0.0208018	1	4	30	7356	AT5G55990
[OVER]	GO:0098586	cellular response to virus	BIOLOGICAL_PROCESS	0.0208018	1	4	30	7356	AT5G23570
[OVER]	GO:0051817	modification of morphology or physiology of other organism involved in symbiotic interaction	BIOLOGICAL_PROCESS	0.0492223	1	11	30	7349	AT5G23570
[OVER]	GO:0050688	regulation of defense response to virus	BIOLOGICAL_PROCESS	0.0208018	1	4	30	7356	AT5G23570
[OVER]	GO:0016411	acylglycerol O-acyltransferase activity	MOLECULAR_FUNCTION	0.0330813	1	7	30	7353	AT1G48300
[OVER]	GO:0052018	modulation by symbiont of RNA levels in host	BIOLOGICAL_PROCESS	0.0166753	1	3	30	7357	AT5G23570
[OVER]	GO:0010267	production of ta-siRNAs involved in RNA interference	BIOLOGICAL_PROCESS	0.0290048	1	6	30	7354	AT5G23570
[OVER]	GO:0004549	tRNA-specific ribonuclease activity	MOLECULAR_FUNCTION	0.0249117	1	5	30	7355	AT5G23570
[OVER]	GO:0004526	ribonuclease P activity	MOLECULAR_FUNCTION	0.0208018	1	4	30	7356	AT5G23570
[OVER]	GO:0052249	modulation of RNA levels in other organism involved in symbiotic interaction	BIOLOGICAL_PROCESS	0.0166753	1	3	30	7357	AT5G23570
[OVER]	GO:0072347	response to anesthetic	BIOLOGICAL_PROCESS	0.0166753	1	3	30	7357	AT1G20160
[OVER]	GO:0005513	detection of calcium ion	BIOLOGICAL_PROCESS	0.00419429	1	0	30	7360	AT5G55990
[OVER]	GO:0006826	iron ion transport	BIOLOGICAL_PROCESS	0.0290048	1	6	30	7354	AT2G40300
[OVER]	GO:0006879	cellular iron ion homeostasis	BIOLOGICAL_PROCESS	0.0290048	1	6	30	7354	AT2G40300
[OVER]	GO:0010037	response to carbon dioxide	BIOLOGICAL_PROCESS	0.0166753	1	3	30	7357	AT1G20160
[OVER]	GO:0010050	vegetative phase change	BIOLOGICAL_PROCESS	0.0208018	1	4	30	7356	AT5G23570
[OVER]	GO:0004322	ferroxidase activity	MOLECULAR_FUNCTION	0.0125319	1	2	30	7358	AT2G40300
[OVER]	GO:0042586	peptide deformylase activity	MOLECULAR_FUNCTION	0.00837155	1	1	30	7359	AT1G15390
[OVER]	GO:0016891	endoribonuclease activity, producing 5'-phosphomonoesters	MOLECULAR_FUNCTION	0.0492223	1	11	30	7349	AT5G23570
[OVER]	GO:0016892	endoribonuclease activity, producing 3'-phosphomonoesters	MOLECULAR_FUNCTION	0.0166753	1	3	30	7357	AT2G02990
[OVER]	GO:0016894	endonuclease activity, active with either ribo- or deoxyribonucleic acids and producing 3'-phosphomonoesters	MOLECULAR_FUNCTION	0.0166753	1	3	30	7357	AT2G02990
[OVER]	GO:0009718	anthocyanin-containing compound biosynthetic process	BIOLOGICAL_PROCESS	0.0371412	1	8	30	7352	AT2G02990
[OVER]	GO:0051275	beta-glucan catabolic process	BIOLOGICAL_PROCESS	0.0290048	1	6	30	7354	AT1G64390
[OVER]	GO:0044003	modification by symbiont of host morphology or physiology	BIOLOGICAL_PROCESS	0.0452117	1	10	30	7350	AT5G23570
[OVER]	GO:0019199	transmembrane receptor protein kinase activity	MOLECULAR_FUNCTION	0.0330813	1	7	30	7353	AT3G43740
[OVER]	GO:0046460	neutral lipid biosynthetic process	BIOLOGICAL_PROCESS	0.0330813	1	7	30	7353	AT1G48300
[OVER]	GO:0046463	acylglycerol biosynthetic process	BIOLOGICAL_PROCESS	0.0330813	1	7	30	7353	AT1G48300
[OVER]	GO:0008199	ferric iron binding	MOLECULAR_FUNCTION	0.0125319	1	2	30	7358	AT2G40300
[OVER]	GO:0009616	virus induced gene silencing	BIOLOGICAL_PROCESS	0.0166753	1	3	30	7357	AT5G23570
[OVER]	GO:0009593	detection of chemical stimulus	BIOLOGICAL_PROCESS	0.0492223	1	11	30	7349	AT5G55990
[OVER]	GO:0016724	oxidoreductase activity, oxidizing metal ions, oxygen as acceptor	MOLECULAR_FUNCTION	0.0125319	1	2	30	7358	AT2G40300
[OVER]	GO:0002697	regulation of immune effector process	BIOLOGICAL_PROCESS	0.0208018	1	4	30	7356	AT5G23570
[OVER]	GO:0008810	cellulase activity	MOLECULAR_FUNCTION	0.0249117	1	5	30	7355	AT1G64390
[OVER]	GO:0033946	xyloglucan-specific endo-beta-1,4-glucanase activity	MOLECULAR_FUNCTION	0.0249117	1	5	30	7355	AT4G30290
[OVER]	GO:0033897	ribonuclease T2 activity	MOLECULAR_FUNCTION	0.0125319	1	2	30	7358	AT2G02990
[OVER]	GO:0052736	beta-glucanase activity	MOLECULAR_FUNCTION	0.0290048	1	6	30	7354	AT4G30290
[OVER]	GO:0019432	triglyceride biosynthetic process	BIOLOGICAL_PROCESS	0.0330813	1	7	30	7353	AT1G48300
[OVER]	GO:0051592	response to calcium ion	BIOLOGICAL_PROCESS	0.0249117	1	5	30	7355	AT5G55990
[OVER]	GO:0055072	iron ion homeostasis	BIOLOGICAL_PROCESS	0.0371412	1	8	30	7352	AT2G40300
[OVER]	GO:0055075	potassium ion homeostasis	BIOLOGICAL_PROCESS	0.0125319	1	2	30	7358	AT5G55990
