# Supplementary material
Source: Preprints.org preprint supplement (doi:10.20944/preprints202107.0372.v1)
Supplement: Supplementary file 13 [file Supplemental Table S6.xlsx]

## Sheet: data
Supplemental Table S6
GO enrichment analysis of hy2 specific quantified and response proteins under salt stress.
Tags	GO.ID	GO.Name	GO.Category	P.Value	Nr.Test	Nr.Reference	Non.Annot.Test	Non.Annot.Reference	SeqTest
[OVER]	GO:0009056	catabolic process	BIOLOGICAL_PROCESS	0.0303479	5	707	14	6665	AT1G34510, AT1G14540, AT4G11320, AT1G74460, AT4G32940
[OVER]	GO:0042493	response to drug	BIOLOGICAL_PROCESS	0.00648847	3	149	16	7223	AT3G50480, AT4G32940, AT1G65690
[OVER]	GO:0009751	response to salicylic acid	BIOLOGICAL_PROCESS	0.000277486	3	48	16	7324	AT3G50480, AT4G32940, AT1G65690
[OVER]	GO:0046677	response to antibiotic	BIOLOGICAL_PROCESS	0.00187758	3	95	16	7277	AT3G50480, AT4G32940, AT1G65690
[OVER]	GO:0014070	response to organic cyclic compound	BIOLOGICAL_PROCESS	0.00204725	3	98	16	7274	AT3G50480, AT4G32940, AT1G65690
[OVER]	GO:0098754	detoxification	BIOLOGICAL_PROCESS	0.0329034	2	110	17	7262	AT1G34510, AT1G14540
[OVER]	GO:0098869	cellular oxidant detoxification	BIOLOGICAL_PROCESS	0.0214664	2	87	17	7285	AT1G34510, AT1G14540
[OVER]	GO:0097237	cellular response to toxic substance	BIOLOGICAL_PROCESS	0.0237789	2	92	17	7280	AT1G34510, AT1G14540
[OVER]	GO:1990748	cellular detoxification	BIOLOGICAL_PROCESS	0.0219209	2	88	17	7284	AT1G34510, AT1G14540
[OVER]	GO:0072593	reactive oxygen species metabolic process	BIOLOGICAL_PROCESS	0.0257002	2	96	17	7276	AT1G34510, AT1G14540
[OVER]	GO:0042737	drug catabolic process	BIOLOGICAL_PROCESS	0.040222	2	123	17	7249	AT1G34510, AT1G14540
[OVER]	GO:0042743	hydrogen peroxide metabolic process	BIOLOGICAL_PROCESS	0.0125333	2	65	17	7307	AT1G34510, AT1G14540
[OVER]	GO:0042744	hydrogen peroxide catabolic process	BIOLOGICAL_PROCESS	0.00918625	2	55	17	7317	AT1G34510, AT1G14540
[OVER]	GO:0009723	response to ethylene	BIOLOGICAL_PROCESS	0.00918625	2	55	17	7317	AT3G50480, AT4G32940
[OVER]	GO:0009753	response to jasmonic acid	BIOLOGICAL_PROCESS	0.0114803	2	62	17	7310	AT3G50480, AT4G32940
[OVER]	GO:0051187	cofactor catabolic process	BIOLOGICAL_PROCESS	0.0140008	2	69	17	7303	AT1G34510, AT1G14540
[OVER]	GO:0016999	antibiotic metabolic process	BIOLOGICAL_PROCESS	0.0228419	2	90	17	7282	AT1G34510, AT1G14540
[OVER]	GO:0017001	antibiotic catabolic process	BIOLOGICAL_PROCESS	0.0108014	2	60	17	7312	AT1G34510, AT1G14540
[OVER]	GO:0006612	protein targeting to membrane	BIOLOGICAL_PROCESS	0.04286	1	16	18	7356	AT3G49100
[OVER]	GO:0006616	SRP-dependent cotranslational protein targeting to membrane, translocation	BIOLOGICAL_PROCESS	0.00257069	1	0	18	7372	AT3G49100
[OVER]	GO:0006613	cotranslational protein targeting to membrane	BIOLOGICAL_PROCESS	0.022912	1	8	18	7364	AT3G49100
[OVER]	GO:0006614	SRP-dependent cotranslational protein targeting to membrane	BIOLOGICAL_PROCESS	0.022912	1	8	18	7364	AT3G49100
[OVER]	GO:0006624	vacuolar protein processing	BIOLOGICAL_PROCESS	0.00769331	1	2	18	7370	AT4G32940
[OVER]	GO:0031640	killing of cells of other organism	BIOLOGICAL_PROCESS	0.0329347	1	12	18	7360	AT2G43510
[OVER]	GO:0006714	sesquiterpenoid metabolic process	BIOLOGICAL_PROCESS	0.0403877	1	15	18	7357	AT1G65690
[OVER]	GO:0016106	sesquiterpenoid biosynthetic process	BIOLOGICAL_PROCESS	0.0279356	1	10	18	7362	AT1G65690
[OVER]	GO:0001906	cell killing	BIOLOGICAL_PROCESS	0.0329347	1	12	18	7360	AT2G43510
[OVER]	GO:0036294	cellular response to decreased oxygen levels	BIOLOGICAL_PROCESS	0.012791	1	4	18	7368	AT1G14540
[OVER]	GO:0019747	regulation of isoprenoid metabolic process	BIOLOGICAL_PROCESS	0.0254269	1	9	18	7363	AT1G65690
[OVER]	GO:0006448	regulation of translational elongation	BIOLOGICAL_PROCESS	0.020391	1	7	18	7365	AT3G49100
[OVER]	GO:0017148	negative regulation of translation	BIOLOGICAL_PROCESS	0.0354251	1	13	18	7359	AT3G49100
[OVER]	GO:0070972	protein localization to endoplasmic reticulum	BIOLOGICAL_PROCESS	0.0254269	1	9	18	7363	AT3G49100
[OVER]	GO:0043455	regulation of secondary metabolic process	BIOLOGICAL_PROCESS	0.0304382	1	11	18	7361	AT1G65690
[OVER]	GO:0072599	establishment of protein localization to endoplasmic reticulum	BIOLOGICAL_PROCESS	0.0254269	1	9	18	7363	AT3G49100
[OVER]	GO:1902930	regulation of alcohol biosynthetic process	BIOLOGICAL_PROCESS	0.012791	1	4	18	7368	AT1G65690
[OVER]	GO:1902932	positive regulation of alcohol biosynthetic process	BIOLOGICAL_PROCESS	0.00769331	1	2	18	7370	AT1G65690
[OVER]	GO:0034249	negative regulation of cellular amide metabolic process	BIOLOGICAL_PROCESS	0.0354251	1	13	18	7359	AT3G49100
[OVER]	GO:0045047	protein targeting to ER	BIOLOGICAL_PROCESS	0.0254269	1	9	18	7363	AT3G49100
[OVER]	GO:1902644	tertiary alcohol metabolic process	BIOLOGICAL_PROCESS	0.0354251	1	13	18	7359	AT1G65690
[OVER]	GO:1902645	tertiary alcohol biosynthetic process	BIOLOGICAL_PROCESS	0.0254269	1	9	18	7363	AT1G65690
[OVER]	GO:0010116	positive regulation of abscisic acid biosynthetic process	BIOLOGICAL_PROCESS	0.00257069	1	0	18	7372	AT1G65690
[OVER]	GO:0010115	regulation of abscisic acid biosynthetic process	BIOLOGICAL_PROCESS	0.00513513	1	1	18	7371	AT1G65690
[OVER]	GO:0009688	abscisic acid biosynthetic process	BIOLOGICAL_PROCESS	0.0254269	1	9	18	7363	AT1G65690
[OVER]	GO:0009687	abscisic acid metabolic process	BIOLOGICAL_PROCESS	0.0354251	1	13	18	7359	AT1G65690
[OVER]	GO:0062013	positive regulation of small molecule metabolic process	BIOLOGICAL_PROCESS	0.012791	1	4	18	7368	AT1G65690
[OVER]	GO:0009863	salicylic acid mediated signaling pathway	BIOLOGICAL_PROCESS	0.0403877	1	15	18	7357	AT1G65690
[OVER]	GO:0071453	cellular response to oxygen levels	BIOLOGICAL_PROCESS	0.012791	1	4	18	7368	AT1G14540
[OVER]	GO:0071456	cellular response to hypoxia	BIOLOGICAL_PROCESS	0.00769331	1	2	18	7370	AT1G14540
[OVER]	GO:0071446	cellular response to salicylic acid stimulus	BIOLOGICAL_PROCESS	0.0477863	1	18	18	7354	AT1G65690
[OVER]	GO:0009610	response to symbiotic fungus	BIOLOGICAL_PROCESS	0.0279356	1	10	18	7362	AT3G50480
[OVER]	GO:0009608	response to symbiont	BIOLOGICAL_PROCESS	0.0304382	1	11	18	7361	AT3G50480
[OVER]	GO:0009609	response to symbiotic bacterium	BIOLOGICAL_PROCESS	0.00257069	1	0	18	7372	AT3G50480
[OVER]	GO:0045828	positive regulation of isoprenoid metabolic process	BIOLOGICAL_PROCESS	0.0153305	1	5	18	7367	AT1G65690
[OVER]	GO:0045834	positive regulation of lipid metabolic process	BIOLOGICAL_PROCESS	0.0153305	1	5	18	7367	AT1G65690
[OVER]	GO:1902074	response to salt	BIOLOGICAL_PROCESS	0.0102453	1	3	18	7369	AT1G65690
[OVER]	GO:0045900	negative regulation of translational elongation	BIOLOGICAL_PROCESS	0.00257069	1	0	18	7372	AT3G49100
[OVER]	GO:0043288	apocarotenoid metabolic process	BIOLOGICAL_PROCESS	0.0354251	1	13	18	7359	AT1G65690
[OVER]	GO:0043289	apocarotenoid biosynthetic process	BIOLOGICAL_PROCESS	0.0254269	1	9	18	7363	AT1G65690
[OVER]	GO:0046889	positive regulation of lipid biosynthetic process	BIOLOGICAL_PROCESS	0.0153305	1	5	18	7367	AT1G65690
[OVER]	GO:0046890	regulation of lipid biosynthetic process	BIOLOGICAL_PROCESS	0.0403877	1	15	18	7357	AT1G65690
[OVER]	GO:0044364	disruption of cells of other organism	BIOLOGICAL_PROCESS	0.0329347	1	12	18	7360	AT2G43510
[OVER]	GO:0004175	endopeptidase activity	MOLECULAR_FUNCTION	0.00709675	3	154	16	7218	AT4G32940, AT5G23140, AT4G11320
[OVER]	GO:0070011	peptidase activity, acting on L-amino acid peptides	MOLECULAR_FUNCTION	0.0302916	3	267	16	7105	AT4G32940, AT5G23140, AT4G11320
[OVER]	GO:0008233	peptidase activity	MOLECULAR_FUNCTION	0.0444367	3	311	16	7061	AT4G32940, AT5G23140, AT4G11320
[OVER]	GO:0004197	cysteine-type endopeptidase activity	MOLECULAR_FUNCTION	0.000644475	2	13	17	7359	AT4G32940, AT4G11320
[OVER]	GO:0016209	antioxidant activity	MOLECULAR_FUNCTION	0.0271819	2	99	17	7273	AT1G34510, AT1G14540
[OVER]	GO:0020037	heme binding	MOLECULAR_FUNCTION	0.0425891	2	127	17	7245	AT1G34510, AT1G14540
[OVER]	GO:0016684	oxidoreductase activity, acting on peroxide as acceptor	MOLECULAR_FUNCTION	0.0201274	2	84	17	7288	AT1G34510, AT1G14540
[OVER]	GO:0004601	peroxidase activity	MOLECULAR_FUNCTION	0.0192553	2	82	17	7290	AT1G34510, AT1G14540
[OVER]	GO:0008234	cysteine-type peptidase activity	MOLECULAR_FUNCTION	0.00631781	2	45	17	7327	AT4G32940, AT4G11320
[OVER]	GO:0047134	protein-disulfide reductase activity	MOLECULAR_FUNCTION	0.0153305	1	5	18	7367	AT2G28270
[OVER]	GO:0030414	peptidase inhibitor activity	MOLECULAR_FUNCTION	0.0379095	1	14	18	7358	AT2G43510
[OVER]	GO:0016247	channel regulator activity	MOLECULAR_FUNCTION	0.0153305	1	5	18	7367	AT2G43510
[OVER]	GO:0016248	channel inhibitor activity	MOLECULAR_FUNCTION	0.012791	1	4	18	7368	AT2G43510
[OVER]	GO:0099106	ion channel regulator activity	MOLECULAR_FUNCTION	0.012791	1	4	18	7368	AT2G43510
[OVER]	GO:0004867	serine-type endopeptidase inhibitor activity	MOLECULAR_FUNCTION	0.0102453	1	3	18	7369	AT2G43510
[OVER]	GO:0004866	endopeptidase inhibitor activity	MOLECULAR_FUNCTION	0.0254269	1	9	18	7363	AT2G43510
[OVER]	GO:0016668	oxidoreductase activity, acting on a sulfur group of donors, NAD(P) as acceptor	MOLECULAR_FUNCTION	0.0403877	1	15	18	7357	AT2G28270
[OVER]	GO:0016762	xyloglucan:xyloglucosyl transferase activity	MOLECULAR_FUNCTION	0.0379095	1	14	18	7358	AT3G23730
[OVER]	GO:0008312	7S RNA binding	MOLECULAR_FUNCTION	0.0178639	1	6	18	7366	AT3G49100
[OVER]	GO:0008200	ion channel inhibitor activity	MOLECULAR_FUNCTION	0.012791	1	4	18	7368	AT2G43510
[OVER]	GO:0061134	peptidase regulator activity	MOLECULAR_FUNCTION	0.0379095	1	14	18	7358	AT2G43510
[OVER]	GO:0061135	endopeptidase regulator activity	MOLECULAR_FUNCTION	0.0254269	1	9	18	7363	AT2G43510
[OVER]	GO:0005047	signal recognition particle binding	MOLECULAR_FUNCTION	0.012791	1	4	18	7368	AT3G49100
[OVER]	GO:0033946	xyloglucan-specific endo-beta-1,4-glucanase activity	MOLECULAR_FUNCTION	0.0153305	1	5	18	7367	AT3G23730
[OVER]	GO:0052736	beta-glucanase activity	MOLECULAR_FUNCTION	0.0178639	1	6	18	7366	AT3G23730
