# Supplementary material
Source: Preprints.org preprint supplement (doi:10.20944/preprints202107.0372.v1)
Supplement: Supplementary file 15 [file Supplemental Table S7.xlsx]

## Sheet: COL4 47+84.out
Supplemental Table S7
GO enrichment analysis of col4 specific response proteins under salt stress.
Tags	GO.ID	GO.Name	GO.Category	P.Value	Nr.Test	Nr.Reference	Non.Annot.Test	Non.Annot.Reference	SeqTest
[OVER]	GO:1901700	response to oxygen-containing compound	BIOLOGICAL_PROCESS	0.00699534	20	490	111	5374	AT4G25100, AT4G39090, AT2G33830, AT5G51100, AT1G35720, AT2G30870, AT5G65020, AT4G23100, AT2G38750, AT2G38760, AT1G29930, AT2G46820, AT1G19350, AT2G43710, AT5G44610, AT4G17040, AT5G01870, AT1G78380, AT1G21400, AT1G78370
[OVER]	GO:0015979	photosynthesis	BIOLOGICAL_PROCESS	0.00132451	11	162	120	5702	AT2G34430, AT1G29930, AT1G19150, AT4G04640, AT5G13630, AT2G46820, AT1G53310, AT1G70760, AT3G54890, AT2G42600, AT5G48790
[OVER]	GO:0006979	response to oxidative stress	BIOLOGICAL_PROCESS	0.00954517	11	213	120	5651	AT4G25100, AT5G43750, AT5G51100, AT5G51890, AT4G33420, AT1G35720, AT2G39460, AT4G17040, AT1G78380, AT4G23100, AT1G78370
[OVER]	GO:0006091	generation of precursor metabolites and energy	BIOLOGICAL_PROCESS	0.0262701	11	249	120	5615	AT2G34430, AT1G29930, AT1G19150, AT4G04640, AT2G46820, AT1G53310, AT1G70760, AT3G54890, AT2G42600, AT5G48790, AT3G52730
[OVER]	GO:0009415	response to water	BIOLOGICAL_PROCESS	0.00251227	9	125	122	5739	AT4G39090, AT1G35720, AT2G30870, AT5G01870, AT1G78380, AT5G65020, AT2G38750, AT2G38760, AT1G78370
[OVER]	GO:0009414	response to water deprivation	BIOLOGICAL_PROCESS	0.00226649	9	123	122	5741	AT4G39090, AT1G35720, AT2G30870, AT5G01870, AT1G78380, AT5G65020, AT2G38750, AT2G38760, AT1G78370
[OVER]	GO:0065003	protein-containing complex assembly	BIOLOGICAL_PROCESS	0.0287574	9	189	122	5675	AT1G53310, AT1G70760, AT5G39740, AT1G45000, AT5G48790, AT5G44610, AT2G39460, AT3G25520, AT3G52730
[OVER]	GO:0098754	detoxification	BIOLOGICAL_PROCESS	0.00110857	8	88	123	5776	AT4G25100, AT5G51100, AT5G51890, AT4G33420, AT2G30870, AT1G78380, AT3G11630, AT1G78370
[OVER]	GO:0019684	photosynthesis, light reaction	BIOLOGICAL_PROCESS	0.00103489	8	87	123	5777	AT2G34430, AT1G29930, AT1G19150, AT4G04640, AT2G46820, AT1G70760, AT3G54890, AT5G48790
[OVER]	GO:0034622	cellular protein-containing complex assembly	BIOLOGICAL_PROCESS	0.0320796	8	162	123	5702	AT1G70760, AT5G39740, AT1G45000, AT5G48790, AT5G44610, AT2G39460, AT3G25520, AT3G52730
[OVER]	GO:0009409	response to cold	BIOLOGICAL_PROCESS	0.0427703	8	172	123	5692	AT3G54890, AT1G35720, AT5G44610, AT2G39460, AT5G65020, AT2G38750, AT3G11630, AT2G38760
[OVER]	GO:0009636	response to toxic substance	BIOLOGICAL_PROCESS	0.0112297	8	132	123	5732	AT4G25100, AT5G51100, AT5G51890, AT4G33420, AT2G30870, AT1G78380, AT3G11630, AT1G78370
[OVER]	GO:0098660	inorganic ion transmembrane transport	BIOLOGICAL_PROCESS	0.0077817	6	74	125	5790	AT1G35720, AT4G04640, AT3G52730, AT1G65410, AT3G28715, AT4G02620
[OVER]	GO:0034220	ion transmembrane transport	BIOLOGICAL_PROCESS	0.0485428	6	115	125	5749	AT1G35720, AT4G04640, AT3G52730, AT1G65410, AT3G28715, AT4G02620
[OVER]	GO:0031668	cellular response to extracellular stimulus	BIOLOGICAL_PROCESS	0.0212021	5	68	126	5796	AT3G20330, AT1G53310, AT1G78380, AT1G21400, AT1G78370
[OVER]	GO:0098869	cellular oxidant detoxification	BIOLOGICAL_PROCESS	0.0260423	5	72	126	5792	AT4G25100, AT5G51890, AT4G33420, AT3G11630, AT5G51100
[OVER]	GO:0097237	cellular response to toxic substance	BIOLOGICAL_PROCESS	0.0301024	5	75	126	5789	AT4G25100, AT5G51890, AT4G33420, AT3G11630, AT5G51100
[OVER]	GO:0098655	cation transmembrane transport	BIOLOGICAL_PROCESS	0.0361069	5	79	126	5785	AT1G35720, AT4G04640, AT3G52730, AT3G28715, AT4G02620
[OVER]	GO:0098662	inorganic cation transmembrane transport	BIOLOGICAL_PROCESS	0.0247717	5	71	126	5793	AT1G35720, AT4G04640, AT3G52730, AT3G28715, AT4G02620
[OVER]	GO:1990748	cellular detoxification	BIOLOGICAL_PROCESS	0.0273541	5	73	126	5791	AT4G25100, AT5G51890, AT4G33420, AT3G11630, AT5G51100
[OVER]	GO:0015672	monovalent inorganic cation transport	BIOLOGICAL_PROCESS	0.0169915	5	64	126	5800	AT1G35720, AT4G04640, AT3G52730, AT3G28715, AT4G02620
[OVER]	GO:0071496	cellular response to external stimulus	BIOLOGICAL_PROCESS	0.0247717	5	71	126	5793	AT3G20330, AT1G53310, AT1G78380, AT1G21400, AT1G78370
[OVER]	GO:0009991	response to extracellular stimulus	BIOLOGICAL_PROCESS	0.0330192	5	77	126	5787	AT3G20330, AT1G53310, AT1G78380, AT1G21400, AT1G78370
[OVER]	GO:0009768	photosynthesis, light harvesting in photosystem I	BIOLOGICAL_PROCESS	0.000323234	4	12	127	5852	AT2G34430, AT1G29930, AT1G19150, AT3G54890
[OVER]	GO:0009404	toxin metabolic process	BIOLOGICAL_PROCESS	0.000976525	4	17	127	5847	AT2G30870, AT1G78380, AT4G23100, AT1G78370
[OVER]	GO:0018298	protein-chromophore linkage	BIOLOGICAL_PROCESS	0.00224157	4	22	127	5842	AT2G34430, AT1G29930, AT1G19150, AT3G54890
[OVER]	GO:0006749	glutathione metabolic process	BIOLOGICAL_PROCESS	0.00296815	4	24	127	5840	AT2G30870, AT1G78380, AT4G23100, AT1G78370
[OVER]	GO:1902600	proton transmembrane transport	BIOLOGICAL_PROCESS	0.0279558	4	49	127	5815	AT4G04640, AT3G52730, AT3G28715, AT4G02620
[OVER]	GO:0009765	photosynthesis, light harvesting	BIOLOGICAL_PROCESS	0.00487351	4	28	127	5836	AT2G34430, AT1G29930, AT1G19150, AT3G54890
[OVER]	GO:0009639	response to red or far red light	BIOLOGICAL_PROCESS	0.0436594	4	57	127	5807	AT1G29930, AT1G19150, AT3G54890, AT1G78370
[OVER]	GO:0000027	ribosomal large subunit assembly	BIOLOGICAL_PROCESS	0.00248418	3	10	128	5854	AT5G39740, AT2G39460, AT3G25520
[OVER]	GO:0042255	ribosome assembly	BIOLOGICAL_PROCESS	0.0165072	3	22	128	5842	AT5G39740, AT2G39460, AT3G25520
[OVER]	GO:0042273	ribosomal large subunit biogenesis	BIOLOGICAL_PROCESS	0.0147578	3	21	128	5843	AT5G39740, AT2G39460, AT3G25520
[OVER]	GO:0010218	response to far red light	BIOLOGICAL_PROCESS	0.00885633	3	17	128	5847	AT1G29930, AT3G54890, AT1G19150
[OVER]	GO:0010114	response to red light	BIOLOGICAL_PROCESS	0.0115901	3	19	128	5845	AT1G29930, AT3G54890, AT1G19150
[OVER]	GO:0009407	toxin catabolic process	BIOLOGICAL_PROCESS	0.00382777	3	12	128	5852	AT1G78380, AT2G30870, AT1G78370
[OVER]	GO:0009637	response to blue light	BIOLOGICAL_PROCESS	0.0431136	3	33	128	5831	AT1G29930, AT3G54890, AT1G19150
[OVER]	GO:0043622	cortical microtubule organization	BIOLOGICAL_PROCESS	0.019011	2	8	129	5856	AT2G37080, AT5G44610
[OVER]	GO:0000305	response to oxygen radical	BIOLOGICAL_PROCESS	0.0229068	2	9	129	5855	AT4G25100, AT5G51100
[OVER]	GO:0000303	response to superoxide	BIOLOGICAL_PROCESS	0.0229068	2	9	129	5855	AT4G25100, AT5G51100
[OVER]	GO:0030865	cortical cytoskeleton organization	BIOLOGICAL_PROCESS	0.0270998	2	10	129	5854	AT2G37080, AT5G44610
[OVER]	GO:0006891	intra-Golgi vesicle-mediated transport	BIOLOGICAL_PROCESS	0.0413181	2	13	129	5851	AT1G06210, AT3G18480
[OVER]	GO:0006801	superoxide metabolic process	BIOLOGICAL_PROCESS	0.0315754	2	11	129	5853	AT4G25100, AT5G51100
[OVER]	GO:0042631	cellular response to water deprivation	BIOLOGICAL_PROCESS	0.0229068	2	9	129	5855	AT1G78380, AT1G78370
[OVER]	GO:0002213	defense response to insect	BIOLOGICAL_PROCESS	0.00926081	2	5	129	5859	AT2G43710, AT4G23100
[OVER]	GO:0009750	response to fructose	BIOLOGICAL_PROCESS	0.0413181	2	13	129	5851	AT2G33830, AT1G29930
[OVER]	GO:0009773	photosynthetic electron transport in photosystem I	BIOLOGICAL_PROCESS	0.0363194	2	12	129	5852	AT2G46820, AT1G70760
[OVER]	GO:0071450	cellular response to oxygen radical	BIOLOGICAL_PROCESS	0.0229068	2	9	129	5855	AT4G25100, AT5G51100
[OVER]	GO:0071451	cellular response to superoxide	BIOLOGICAL_PROCESS	0.0229068	2	9	129	5855	AT4G25100, AT5G51100
[OVER]	GO:0071462	cellular response to water stimulus	BIOLOGICAL_PROCESS	0.0229068	2	9	129	5855	AT1G78380, AT1G78370
[OVER]	GO:0031122	cytoplasmic microtubule organization	BIOLOGICAL_PROCESS	0.0229068	2	9	129	5855	AT2G37080, AT5G44610
[OVER]	GO:0009955	adaxial/abaxial pattern specification	BIOLOGICAL_PROCESS	0.0315754	2	11	129	5853	AT5G39740, AT3G25520
[OVER]	GO:0019430	removal of superoxide radicals	BIOLOGICAL_PROCESS	0.0229068	2	9	129	5855	AT4G25100, AT5G51100
[OVER]	GO:0006695	cholesterol biosynthetic process	BIOLOGICAL_PROCESS	0.0432292	1	1	130	5863	AT5G47770
[OVER]	GO:0006750	glutathione biosynthetic process	BIOLOGICAL_PROCESS	0.0432292	1	1	130	5863	AT4G23100
[OVER]	GO:0048524	positive regulation of viral process	BIOLOGICAL_PROCESS	0.0218515	1	0	130	5864	AT5G03160
[OVER]	GO:0051851	modification by host of symbiont morphology or physiology	BIOLOGICAL_PROCESS	0.0218515	1	0	130	5864	AT5G03160
[OVER]	GO:0006434	seryl-tRNA aminoacylation	BIOLOGICAL_PROCESS	0.0432292	1	1	130	5863	AT5G27470
[OVER]	GO:1902358	sulfate transmembrane transport	BIOLOGICAL_PROCESS	0.0432292	1	1	130	5863	AT1G65410
[OVER]	GO:0017062	respiratory chain complex III assembly	BIOLOGICAL_PROCESS	0.0218515	1	0	130	5864	AT3G52730
[OVER]	GO:0044794	positive regulation by host of viral process	BIOLOGICAL_PROCESS	0.0218515	1	0	130	5864	AT5G03160
[OVER]	GO:0044788	modulation by host of viral process	BIOLOGICAL_PROCESS	0.0218515	1	0	130	5864	AT5G03160
[OVER]	GO:0046263	nitrotoluene catabolic process	BIOLOGICAL_PROCESS	0.0218515	1	0	130	5864	AT1G78380
[OVER]	GO:0046260	trinitrotoluene catabolic process	BIOLOGICAL_PROCESS	0.0218515	1	0	130	5864	AT1G78380
[OVER]	GO:0042779	tRNA 3'-trailer cleavage	BIOLOGICAL_PROCESS	0.0432292	1	1	130	5863	AT3G16260
[OVER]	GO:0042780	tRNA 3'-end processing	BIOLOGICAL_PROCESS	0.0432292	1	1	130	5863	AT3G16260
[OVER]	GO:0010258	NADH dehydrogenase complex (plastoquinone) assembly	BIOLOGICAL_PROCESS	0.0432292	1	1	130	5863	AT1G70760
[OVER]	GO:0046256	2,4,6-trinitrotoluene catabolic process	BIOLOGICAL_PROCESS	0.0218515	1	0	130	5864	AT1G78380
[OVER]	GO:0072684	mitochondrial tRNA 3'-trailer cleavage, endonucleolytic	BIOLOGICAL_PROCESS	0.0432292	1	1	130	5863	AT3G16260
[OVER]	GO:0097623	potassium ion export across plasma membrane	BIOLOGICAL_PROCESS	0.0218515	1	0	130	5864	AT1G35720
[OVER]	GO:0072491	toluene-containing compound catabolic process	BIOLOGICAL_PROCESS	0.0218515	1	0	130	5864	AT1G78380
[OVER]	GO:0072490	toluene-containing compound metabolic process	BIOLOGICAL_PROCESS	0.0218515	1	0	130	5864	AT1G78380
[OVER]	GO:1902653	secondary alcohol biosynthetic process	BIOLOGICAL_PROCESS	0.0432292	1	1	130	5863	AT5G47770
[OVER]	GO:0018974	2,4,6-trinitrotoluene metabolic process	BIOLOGICAL_PROCESS	0.0218515	1	0	130	5864	AT1G78380
[OVER]	GO:0018973	trinitrotoluene metabolic process	BIOLOGICAL_PROCESS	0.0218515	1	0	130	5864	AT1G78380
[OVER]	GO:0033384	geranyl diphosphate biosynthetic process	BIOLOGICAL_PROCESS	0.0432292	1	1	130	5863	AT5G47770
[OVER]	GO:0033383	geranyl diphosphate metabolic process	BIOLOGICAL_PROCESS	0.0432292	1	1	130	5863	AT5G47770
[OVER]	GO:0045337	farnesyl diphosphate biosynthetic process	BIOLOGICAL_PROCESS	0.0432292	1	1	130	5863	AT5G47770
[OVER]	GO:0019184	nonribosomal peptide biosynthetic process	BIOLOGICAL_PROCESS	0.0432292	1	1	130	5863	AT4G23100
[OVER]	GO:0034414	tRNA 3'-trailer cleavage, endonucleolytic	BIOLOGICAL_PROCESS	0.0432292	1	1	130	5863	AT3G16260
[OVER]	GO:1905267	endonucleolytic cleavage involved in tRNA processing	BIOLOGICAL_PROCESS	0.0432292	1	1	130	5863	AT3G16260
[OVER]	GO:0008203	cholesterol metabolic process	BIOLOGICAL_PROCESS	0.0432292	1	1	130	5863	AT5G47770
[OVER]	GO:0034551	mitochondrial respiratory chain complex III assembly	BIOLOGICAL_PROCESS	0.0218515	1	0	130	5864	AT3G52730
[OVER]	GO:0031115	negative regulation of microtubule polymerization	BIOLOGICAL_PROCESS	0.0432292	1	1	130	5863	AT5G44610
[OVER]	GO:2000693	positive regulation of seed maturation	BIOLOGICAL_PROCESS	0.0218515	1	0	130	5864	AT3G54620
[OVER]	GO:0097056	selenocysteinyl-tRNA(Sec) biosynthetic process	BIOLOGICAL_PROCESS	0.0432292	1	1	130	5863	AT5G27470
[OVER]	GO:0051702	interaction with symbiont	BIOLOGICAL_PROCESS	0.0218515	1	0	130	5864	AT5G03160
[OVER]	GO:0140115	export across plasma membrane	BIOLOGICAL_PROCESS	0.0218515	1	0	130	5864	AT1G35720
[OVER]	GO:0015774	polysaccharide transport	BIOLOGICAL_PROCESS	0.0432292	1	1	130	5863	AT5G65020
[OVER]	GO:0019326	nitrotoluene metabolic process	BIOLOGICAL_PROCESS	0.0218515	1	0	130	5864	AT1G78380
[OVER]	GO:0005198	structural molecule activity	MOLECULAR_FUNCTION	0.0137713	12	256	119	5608	AT4G35570, AT4G14320, AT5G52810, AT5G39740, AT5G17870, AT5G15200, AT1G48830, AT3G56340, AT2G19730, AT2G39460, AT3G25520, ATCG00065
[OVER]	GO:0003735	structural constituent of ribosome	MOLECULAR_FUNCTION	0.00963801	10	184	121	5680	AT4G14320, AT5G39740, AT5G17870, AT5G15200, AT1G48830, AT3G56340, AT2G19730, AT2G39460, AT3G25520, ATCG00065
[OVER]	GO:0016209	antioxidant activity	MOLECULAR_FUNCTION	0.00011456	9	79	122	5785	AT4G25100, AT5G51100, AT5G51890, AT4G33420, AT1G35720, AT2G30870, AT1G78380, AT3G11630, AT1G78370
[OVER]	GO:0016684	oxidoreductase activity, acting on peroxide as acceptor	MOLECULAR_FUNCTION	0.00107949	7	67	124	5797	AT5G51890, AT4G33420, AT1G35720, AT2G30870, AT1G78380, AT3G11630, AT1G78370
[OVER]	GO:0004601	peroxidase activity	MOLECULAR_FUNCTION	0.00091616	7	65	124	5799	AT5G51890, AT4G33420, AT1G35720, AT2G30870, AT1G78380, AT3G11630, AT1G78370
[OVER]	GO:0019843	rRNA binding	MOLECULAR_FUNCTION	0.00237769	6	57	125	5807	AT5G15200, AT2G39460, AT3G25520, AT5G39740, AT5G17870, ATCG00065
[OVER]	GO:0008289	lipid binding	MOLECULAR_FUNCTION	0.0327588	6	104	125	5760	AT1G35720, AT5G44610, AT5G01870, AT5G65020, AT2G38750, AT2G38760
[OVER]	GO:0046906	tetrapyrrole binding	MOLECULAR_FUNCTION	0.0423453	6	111	125	5753	AT2G34430, AT1G29930, AT5G51890, AT4G33420, AT1G19150, AT3G54890
[OVER]	GO:0005543	phospholipid binding	MOLECULAR_FUNCTION	0.00484621	5	46	126	5818	AT1G35720, AT5G44610, AT5G65020, AT2G38750, AT2G38760
[OVER]	GO:0005544	calcium-dependent phospholipid binding	MOLECULAR_FUNCTION	7.25e-06	4	3	127	5861	AT1G35720, AT5G65020, AT2G38750, AT2G38760
[OVER]	GO:0031409	pigment binding	MOLECULAR_FUNCTION	0.000323234	4	12	127	5852	AT2G34430, AT1G29930, AT1G19150, AT3G54890
[OVER]	GO:0016168	chlorophyll binding	MOLECULAR_FUNCTION	0.00139672	4	19	127	5845	AT2G34430, AT1G29930, AT1G19150, AT3G54890
[OVER]	GO:0042277	peptide binding	MOLECULAR_FUNCTION	0.0216146	4	45	127	5819	AT4G33060, AT2G30870, AT1G78380, AT1G78370
[OVER]	GO:0004252	serine-type endopeptidase activity	MOLECULAR_FUNCTION	0.0139117	4	39	127	5825	AT4G17040, AT1G35340, AT1G12410, ATCG00670
[OVER]	GO:0042625	ATPase-coupled ion transmembrane transporter activity	MOLECULAR_FUNCTION	0.00991259	4	35	127	5829	AT4G04640, AT1G65410, AT3G28715, AT4G02620
[OVER]	GO:0016765	transferase activity, transferring alkyl or aryl (other than methyl) groups	MOLECULAR_FUNCTION	0.0414734	4	56	127	5808	AT5G47770, AT2G30870, AT1G78380, AT1G78370
[OVER]	GO:0072341	modified amino acid binding	MOLECULAR_FUNCTION	0.00147984	3	8	128	5856	AT1G78380, AT2G30870, AT1G78370
[OVER]	GO:1900750	oligopeptide binding	MOLECULAR_FUNCTION	0.00109365	3	7	128	5857	AT1G78380, AT2G30870, AT1G78370
[OVER]	GO:0043295	glutathione binding	MOLECULAR_FUNCTION	0.00109365	3	7	128	5857	AT1G78380, AT2G30870, AT1G78370
[OVER]	GO:0019829	ATPase-coupled cation transmembrane transporter activity	MOLECULAR_FUNCTION	0.0372804	3	31	128	5833	AT3G28715, AT4G02620, AT4G04640
[OVER]	GO:0044769	ATPase activity, coupled to transmembrane movement of ions, rotational mechanism	MOLECULAR_FUNCTION	0.0046365	3	13	128	5851	AT3G28715, AT4G02620, AT4G04640
[OVER]	GO:1901681	sulfur compound binding	MOLECULAR_FUNCTION	0.0318841	3	29	128	5835	AT1G78380, AT2G30870, AT1G78370
[OVER]	GO:0004364	glutathione transferase activity	MOLECULAR_FUNCTION	0.0115901	3	19	128	5845	AT1G78380, AT2G30870, AT1G78370
[OVER]	GO:0009678	pyrophosphate hydrolysis-driven proton transmembrane transporter activity	MOLECULAR_FUNCTION	0.0131191	3	20	128	5844	AT3G28715, AT4G02620, AT4G04640
[OVER]	GO:0046961	proton-transporting ATPase activity, rotational mechanism	MOLECULAR_FUNCTION	0.0046365	3	13	128	5851	AT3G28715, AT4G02620, AT4G04640
[OVER]	GO:0008964	phosphoenolpyruvate carboxylase activity	MOLECULAR_FUNCTION	0.00140137	2	1	129	5863	AT1G53310, AT2G42600
[OVER]	GO:0019904	protein domain specific binding	MOLECULAR_FUNCTION	0.0154275	2	7	129	5857	AT2G42590, AT5G10450
[OVER]	GO:0004197	cysteine-type endopeptidase activity	MOLECULAR_FUNCTION	0.0315754	2	11	129	5853	AT4G39090, AT3G48340
[OVER]	GO:0008097	5S rRNA binding	MOLECULAR_FUNCTION	0.00453847	2	3	129	5861	AT5G39740, AT3G25520
[OVER]	GO:0004611	phosphoenolpyruvate carboxykinase activity	MOLECULAR_FUNCTION	0.00453847	2	3	129	5861	AT1G53310, AT2G42600
[OVER]	GO:0004784	superoxide dismutase activity	MOLECULAR_FUNCTION	0.00671051	2	4	129	5860	AT4G25100, AT5G51100
[OVER]	GO:0016721	oxidoreductase activity, acting on superoxide radicals as acceptor	MOLECULAR_FUNCTION	0.00671051	2	4	129	5860	AT4G25100, AT5G51100
[OVER]	GO:0004032	alditol:NADP+ 1-oxidoreductase activity	MOLECULAR_FUNCTION	0.0218515	1	0	130	5864	AT1G04420
[OVER]	GO:0004070	aspartate carbamoyltransferase activity	MOLECULAR_FUNCTION	0.0218515	1	0	130	5864	AT3G20330
[OVER]	GO:0004161	dimethylallyltranstransferase activity	MOLECULAR_FUNCTION	0.0432292	1	1	130	5863	AT5G47770
[OVER]	GO:0005212	structural constituent of eye lens	MOLECULAR_FUNCTION	0.0218515	1	0	130	5864	AT5G52810
[OVER]	GO:0015116	sulfate transmembrane transporter activity	MOLECULAR_FUNCTION	0.0432292	1	1	130	5863	AT1G65410
[OVER]	GO:0042781	3'-tRNA processing endoribonuclease activity	MOLECULAR_FUNCTION	0.0432292	1	1	130	5863	AT3G16260
[OVER]	GO:0016215	acyl-CoA desaturase activity	MOLECULAR_FUNCTION	0.0218515	1	0	130	5864	AT2G43710
[OVER]	GO:0004357	glutamate-cysteine ligase activity	MOLECULAR_FUNCTION	0.0218515	1	0	130	5864	AT4G23100
[OVER]	GO:0004828	serine-tRNA ligase activity	MOLECULAR_FUNCTION	0.0432292	1	1	130	5863	AT5G27470
[OVER]	GO:0004867	serine-type endopeptidase inhibitor activity	MOLECULAR_FUNCTION	0.0432292	1	1	130	5863	AT2G43520
[OVER]	GO:0004768	stearoyl-CoA 9-desaturase activity	MOLECULAR_FUNCTION	0.0218515	1	0	130	5864	AT2G43710
[OVER]	GO:0015419	ATPase-coupled sulfate transmembrane transporter activity	MOLECULAR_FUNCTION	0.0218515	1	0	130	5864	AT1G65410
[OVER]	GO:0016743	carboxyl- or carbamoyltransferase activity	MOLECULAR_FUNCTION	0.0432292	1	1	130	5863	AT3G20330
[OVER]	GO:0050307	sucrose-phosphate phosphatase activity	MOLECULAR_FUNCTION	0.0432292	1	1	130	5863	AT3G52340
[OVER]	GO:0043225	ATPase-coupled inorganic anion transmembrane transporter activity	MOLECULAR_FUNCTION	0.0218515	1	0	130	5864	AT1G65410
[OVER]	GO:0003863	3-methyl-2-oxobutanoate dehydrogenase (2-methylpropanoyl-transferring) activity	MOLECULAR_FUNCTION	0.0432292	1	1	130	5863	AT1G21400
