# Supplementary material
Source: Preprints.org preprint supplement (doi:10.20944/preprints202107.0372.v1)
Supplement: Supplementary file 17 [file Supplemental Table S8.xlsx]

## Sheet: HY2 29+5.out
Supplemental Table S8
GO enrichment analysis of hy2 specific response proteins under salt stress.
Tags	GO.ID	GO.Name	GO.Category	P.Value	Nr.Test	Nr.Reference	Non.Annot.Test	Non.Annot.Reference	SeqTest
[OVER]	GO:0006952	defense response	BIOLOGICAL_PROCESS	0.00261655	8	432	26	5529	AT3G05200, AT1G66100, AT5G12140, AT2G39210, AT1G75380, AT1G75040, AT3G59220, AT4G09650
[OVER]	GO:0009605	response to external stimulus	BIOLOGICAL_PROCESS	0.00761976	8	516	26	5445	AT3G05200, AT5G12140, AT2G39210, AT1G75380, AT1G75040, AT2G41100, AT3G59220, AT4G09650
[OVER]	GO:0051704	multi-organism process	BIOLOGICAL_PROCESS	0.0271055	7	525	27	5436	AT3G05200, AT2G39210, AT1G75380, AT1G75040, AT2G41100, AT3G59220, AT4G09650
[OVER]	GO:0098542	defense response to other organism	BIOLOGICAL_PROCESS	0.00786085	6	310	28	5651	AT3G05200, AT2G39210, AT1G75380, AT1G75040, AT3G59220, AT4G09650
[OVER]	GO:0006508	proteolysis	BIOLOGICAL_PROCESS	0.0130325	6	346	28	5615	AT4G35350, AT5G12140, AT4G25370, AT5G58590, AT1G07140, AT1G20850
[OVER]	GO:0009607	response to biotic stimulus	BIOLOGICAL_PROCESS	0.0289928	6	415	28	5546	AT3G05200, AT2G39210, AT1G75380, AT1G75040, AT3G59220, AT4G09650
[OVER]	GO:0043207	response to external biotic stimulus	BIOLOGICAL_PROCESS	0.0250287	6	401	28	5560	AT3G05200, AT2G39210, AT1G75380, AT1G75040, AT3G59220, AT4G09650
[OVER]	GO:0051707	response to other organism	BIOLOGICAL_PROCESS	0.0250287	6	401	28	5560	AT3G05200, AT2G39210, AT1G75380, AT1G75040, AT3G59220, AT4G09650
[OVER]	GO:1901565	organonitrogen compound catabolic process	BIOLOGICAL_PROCESS	0.0204535	5	278	29	5683	AT5G28050, AT4G35350, AT5G58590, AT1G07140, AT1G20850
[OVER]	GO:0050790	regulation of catalytic activity	BIOLOGICAL_PROCESS	0.00445229	4	116	30	5845	AT5G12140, AT5G62350, AT5G58590, AT3G02730
[OVER]	GO:0065009	regulation of molecular function	BIOLOGICAL_PROCESS	0.00575642	4	125	30	5836	AT5G12140, AT5G62350, AT5G58590, AT3G02730
[OVER]	GO:0051603	proteolysis involved in cellular protein catabolic process	BIOLOGICAL_PROCESS	0.00729542	4	134	30	5827	AT4G35350, AT5G58590, AT1G07140, AT1G20850
[OVER]	GO:0044257	cellular protein catabolic process	BIOLOGICAL_PROCESS	0.00846035	4	140	30	5821	AT4G35350, AT5G58590, AT1G07140, AT1G20850
[OVER]	GO:0030163	protein catabolic process	BIOLOGICAL_PROCESS	0.0129401	4	159	30	5802	AT4G35350, AT5G58590, AT1G07140, AT1G20850
[OVER]	GO:0044265	cellular macromolecule catabolic process	BIOLOGICAL_PROCESS	0.0316688	4	210	30	5751	AT4G35350, AT5G58590, AT1G07140, AT1G20850
[OVER]	GO:0051726	regulation of cell cycle	BIOLOGICAL_PROCESS	0.00122791	3	35	31	5926	AT2G18040, AT5G58590, AT1G07140
[OVER]	GO:0043086	negative regulation of catalytic activity	BIOLOGICAL_PROCESS	0.00113535	3	34	31	5927	AT5G12140, AT5G62350, AT3G02730
[OVER]	GO:0044092	negative regulation of molecular function	BIOLOGICAL_PROCESS	0.00153372	3	38	31	5923	AT5G12140, AT5G62350, AT3G02730
[OVER]	GO:0033043	regulation of organelle organization	BIOLOGICAL_PROCESS	0.00257004	3	46	31	5915	AT1G75380, AT5G58590, AT1G07140
[OVER]	GO:0009642	response to light intensity	BIOLOGICAL_PROCESS	0.00597792	3	63	31	5898	AT2G41100, AT3G59220, AT3G02730
[OVER]	GO:0009611	response to wounding	BIOLOGICAL_PROCESS	0.0082114	3	71	31	5890	AT5G50200, AT5G12140, AT1G75380
[OVER]	GO:0007049	cell cycle	BIOLOGICAL_PROCESS	0.0372804	3	128	31	5833	AT2G18040, AT5G58590, AT1G07140
[OVER]	GO:0051128	regulation of cellular component organization	BIOLOGICAL_PROCESS	0.0127719	3	84	31	5877	AT1G75380, AT5G58590, AT1G07140
[OVER]	GO:0007100	mitotic centrosome separation	BIOLOGICAL_PROCESS	3.12e-05	2	0	32	5961	AT5G58590, AT1G07140
[OVER]	GO:0046607	positive regulation of centrosome cycle	BIOLOGICAL_PROCESS	3.12e-05	2	0	32	5961	AT5G58590, AT1G07140
[OVER]	GO:0046604	positive regulation of mitotic centrosome separation	BIOLOGICAL_PROCESS	3.12e-05	2	0	32	5961	AT5G58590, AT1G07140
[OVER]	GO:0046605	regulation of centrosome cycle	BIOLOGICAL_PROCESS	3.12e-05	2	0	32	5961	AT5G58590, AT1G07140
[OVER]	GO:0046602	regulation of mitotic centrosome separation	BIOLOGICAL_PROCESS	3.12e-05	2	0	32	5961	AT5G58590, AT1G07140
[OVER]	GO:0007098	centrosome cycle	BIOLOGICAL_PROCESS	3.12e-05	2	0	32	5961	AT5G58590, AT1G07140
[OVER]	GO:0051299	centrosome separation	BIOLOGICAL_PROCESS	3.12e-05	2	0	32	5961	AT5G58590, AT1G07140
[OVER]	GO:0045840	positive regulation of mitotic nuclear division	BIOLOGICAL_PROCESS	3.12e-05	2	0	32	5961	AT5G58590, AT1G07140
[OVER]	GO:0031023	microtubule organizing center organization	BIOLOGICAL_PROCESS	9.33e-05	2	1	32	5960	AT5G58590, AT1G07140
[OVER]	GO:0044843	cell cycle G1/S phase transition	BIOLOGICAL_PROCESS	0.000186012	2	2	32	5959	AT5G58590, AT1G07140
[OVER]	GO:0010623	programmed cell death involved in cell development	BIOLOGICAL_PROCESS	0.000186012	2	2	32	5959	AT4G35350, AT1G20850
[OVER]	GO:0000082	G1/S transition of mitotic cell cycle	BIOLOGICAL_PROCESS	0.000186012	2	2	32	5959	AT5G58590, AT1G07140
[OVER]	GO:0051785	positive regulation of nuclear division	BIOLOGICAL_PROCESS	0.000186012	2	2	32	5959	AT5G58590, AT1G07140
[OVER]	GO:0007088	regulation of mitotic nuclear division	BIOLOGICAL_PROCESS	0.000308917	2	3	32	5958	AT5G58590, AT1G07140
[OVER]	GO:0045931	positive regulation of mitotic cell cycle	BIOLOGICAL_PROCESS	0.000461728	2	4	32	5957	AT5G58590, AT1G07140
[OVER]	GO:0007051	spindle organization	BIOLOGICAL_PROCESS	0.000644121	2	5	32	5956	AT5G58590, AT1G07140
[OVER]	GO:0090068	positive regulation of cell cycle process	BIOLOGICAL_PROCESS	0.000855776	2	6	32	5955	AT5G58590, AT1G07140
[OVER]	GO:0044770	cell cycle phase transition	BIOLOGICAL_PROCESS	0.0013656	2	8	32	5953	AT5G58590, AT1G07140
[OVER]	GO:0044772	mitotic cell cycle phase transition	BIOLOGICAL_PROCESS	0.0013656	2	8	32	5953	AT5G58590, AT1G07140
[OVER]	GO:0051783	regulation of nuclear division	BIOLOGICAL_PROCESS	0.00109637	2	7	32	5954	AT5G58590, AT1G07140
[OVER]	GO:0051495	positive regulation of cytoskeleton organization	BIOLOGICAL_PROCESS	0.0013656	2	8	32	5953	AT5G58590, AT1G07140
[OVER]	GO:0032886	regulation of microtubule-based process	BIOLOGICAL_PROCESS	0.00166314	2	9	32	5952	AT5G58590, AT1G07140
[OVER]	GO:0045787	positive regulation of cell cycle	BIOLOGICAL_PROCESS	0.00166314	2	9	32	5952	AT5G58590, AT1G07140
[OVER]	GO:0070507	regulation of microtubule cytoskeleton organization	BIOLOGICAL_PROCESS	0.00166314	2	9	32	5952	AT5G58590, AT1G07140
[OVER]	GO:0007346	regulation of mitotic cell cycle	BIOLOGICAL_PROCESS	0.00313027	2	13	32	5948	AT5G58590, AT1G07140
[OVER]	GO:0010638	positive regulation of organelle organization	BIOLOGICAL_PROCESS	0.00356477	2	14	32	5947	AT5G58590, AT1G07140
[OVER]	GO:0140014	mitotic nuclear division	BIOLOGICAL_PROCESS	0.00402576	2	15	32	5946	AT5G58590, AT1G07140
[OVER]	GO:0010564	regulation of cell cycle process	BIOLOGICAL_PROCESS	0.00451294	2	16	32	5945	AT5G58590, AT1G07140
[OVER]	GO:0006405	RNA export from nucleus	BIOLOGICAL_PROCESS	0.00612868	2	19	32	5942	AT5G58590, AT1G07140
[OVER]	GO:0051168	nuclear export	BIOLOGICAL_PROCESS	0.00733146	2	21	32	5940	AT5G58590, AT1G07140
[OVER]	GO:0051493	regulation of cytoskeleton organization	BIOLOGICAL_PROCESS	0.00796968	2	22	32	5939	AT5G58590, AT1G07140
[OVER]	GO:0012501	programmed cell death	BIOLOGICAL_PROCESS	0.0491656	2	61	32	5900	AT4G35350, AT1G20850
[OVER]	GO:0000278	mitotic cell cycle	BIOLOGICAL_PROCESS	0.0276546	2	44	32	5917	AT5G58590, AT1G07140
[OVER]	GO:0000280	nuclear division	BIOLOGICAL_PROCESS	0.011518	2	27	32	5934	AT5G58590, AT1G07140
[OVER]	GO:0006403	RNA localization	BIOLOGICAL_PROCESS	0.0371769	2	52	32	5909	AT5G58590, AT1G07140
[OVER]	GO:0048285	organelle fission	BIOLOGICAL_PROCESS	0.0287824	2	45	32	5916	AT5G58590, AT1G07140
[OVER]	GO:0000226	microtubule cytoskeleton organization	BIOLOGICAL_PROCESS	0.0122971	2	28	32	5933	AT5G58590, AT1G07140
[OVER]	GO:0050658	RNA transport	BIOLOGICAL_PROCESS	0.0334744	2	49	32	5912	AT5G58590, AT1G07140
[OVER]	GO:0050657	nucleic acid transport	BIOLOGICAL_PROCESS	0.0334744	2	49	32	5912	AT5G58590, AT1G07140
[OVER]	GO:1901698	response to nitrogen compound	BIOLOGICAL_PROCESS	0.0243835	2	41	32	5920	AT3G05200, AT5G50200
[OVER]	GO:0044093	positive regulation of molecular function	BIOLOGICAL_PROCESS	0.0299285	2	46	32	5915	AT5G58590, AT3G02730
[OVER]	GO:0051236	establishment of RNA localization	BIOLOGICAL_PROCESS	0.0334744	2	49	32	5912	AT5G58590, AT1G07140
[OVER]	GO:0007017	microtubule-based process	BIOLOGICAL_PROCESS	0.0359257	2	51	32	5910	AT5G58590, AT1G07140
[OVER]	GO:0051336	regulation of hydrolase activity	BIOLOGICAL_PROCESS	0.0254549	2	42	32	5919	AT5G12140, AT5G58590
[OVER]	GO:0051028	mRNA transport	BIOLOGICAL_PROCESS	0.0254549	2	42	32	5919	AT5G58590, AT1G07140
[OVER]	GO:0051130	positive regulation of cellular component organization	BIOLOGICAL_PROCESS	0.0100283	2	25	32	5936	AT5G58590, AT1G07140
[OVER]	GO:0015931	nucleobase-containing compound transport	BIOLOGICAL_PROCESS	0.0436799	2	57	32	5904	AT5G58590, AT1G07140
[OVER]	GO:1903047	mitotic cell cycle process	BIOLOGICAL_PROCESS	0.0107616	2	26	32	5935	AT5G58590, AT1G07140
[OVER]	GO:0043085	positive regulation of catalytic activity	BIOLOGICAL_PROCESS	0.0276546	2	44	32	5917	AT5G58590, AT3G02730
[OVER]	GO:0090311	regulation of protein deacetylation	BIOLOGICAL_PROCESS	0.00567139	1	0	33	5961	AT1G75380
[OVER]	GO:0010430	fatty acid omega-oxidation	BIOLOGICAL_PROCESS	0.00567139	1	0	33	5961	AT1G72970
[OVER]	GO:0031063	regulation of histone deacetylation	BIOLOGICAL_PROCESS	0.00567139	1	0	33	5961	AT1G75380
[OVER]	GO:1902275	regulation of chromatin organization	BIOLOGICAL_PROCESS	0.0499324	1	8	33	5953	AT1G75380
[OVER]	GO:0031540	regulation of anthocyanin biosynthetic process	BIOLOGICAL_PROCESS	0.0169207	1	2	33	5959	AT1G75040
[OVER]	GO:0031537	regulation of anthocyanin metabolic process	BIOLOGICAL_PROCESS	0.0499324	1	8	33	5953	AT1G75040
[OVER]	GO:0052027	modulation by symbiont of host signal transduction pathway	BIOLOGICAL_PROCESS	0.0113116	1	1	33	5960	AT2G41100
[OVER]	GO:0010200	response to chitin	BIOLOGICAL_PROCESS	0.0390499	1	6	33	5955	AT3G05200
[OVER]	GO:0010244	response to low fluence blue light stimulus by blue low-fluence system	BIOLOGICAL_PROCESS	0.0224989	1	3	33	5958	AT3G59220
[OVER]	GO:0052250	modulation of signal transduction in other organism involved in symbiotic interaction	BIOLOGICAL_PROCESS	0.0113116	1	1	33	5960	AT2G41100
[OVER]	GO:0030522	intracellular receptor signaling pathway	BIOLOGICAL_PROCESS	0.0499324	1	8	33	5953	AT3G59220
[OVER]	GO:0009164	nucleoside catabolic process	BIOLOGICAL_PROCESS	0.0280464	1	4	33	5957	AT5G28050
[OVER]	GO:0010167	response to nitrate	BIOLOGICAL_PROCESS	0.0280464	1	4	33	5957	AT5G50200
[OVER]	GO:0009718	anthocyanin-containing compound biosynthetic process	BIOLOGICAL_PROCESS	0.0335633	1	5	33	5956	AT1G75040
[OVER]	GO:0052548	regulation of endopeptidase activity	BIOLOGICAL_PROCESS	0.0390499	1	6	33	5955	AT5G12140
[OVER]	GO:0052547	regulation of peptidase activity	BIOLOGICAL_PROCESS	0.0390499	1	6	33	5955	AT5G12140
[OVER]	GO:0009652	thigmotropism	BIOLOGICAL_PROCESS	0.0113116	1	1	33	5960	AT2G41100
[OVER]	GO:0034605	cellular response to heat	BIOLOGICAL_PROCESS	0.0499324	1	8	33	5953	AT5G12140
[OVER]	GO:0075133	modulation by symbiont of host calcium or calmodulin-mediated signal transduction	BIOLOGICAL_PROCESS	0.0113116	1	1	33	5960	AT2G41100
[OVER]	GO:0034656	nucleobase-containing small molecule catabolic process	BIOLOGICAL_PROCESS	0.0280464	1	4	33	5957	AT5G28050
[OVER]	GO:0044068	modulation by symbiont of host cellular process	BIOLOGICAL_PROCESS	0.0169207	1	2	33	5959	AT2G41100
[OVER]	GO:0044003	modification by symbiont of host morphology or physiology	BIOLOGICAL_PROCESS	0.0499324	1	8	33	5953	AT2G41100
[OVER]	GO:0051346	negative regulation of hydrolase activity	BIOLOGICAL_PROCESS	0.0499324	1	8	33	5953	AT5G12140
[OVER]	GO:0009772	photosynthetic electron transport in photosystem II	BIOLOGICAL_PROCESS	0.0499324	1	8	33	5953	AT4G09650
[OVER]	GO:0009785	blue light signaling pathway	BIOLOGICAL_PROCESS	0.0499324	1	8	33	5953	AT3G59220
[OVER]	GO:0010466	negative regulation of peptidase activity	BIOLOGICAL_PROCESS	0.0390499	1	6	33	5955	AT5G12140
[OVER]	GO:0009612	response to mechanical stimulus	BIOLOGICAL_PROCESS	0.0390499	1	6	33	5955	AT2G41100
[OVER]	GO:0044501	modulation of signal transduction in other organism	BIOLOGICAL_PROCESS	0.0113116	1	1	33	5960	AT2G41100
[OVER]	GO:0006152	purine nucleoside catabolic process	BIOLOGICAL_PROCESS	0.0224989	1	3	33	5958	AT5G28050
[OVER]	GO:0045861	negative regulation of proteolysis	BIOLOGICAL_PROCESS	0.0390499	1	6	33	5955	AT5G12140
[OVER]	GO:0015772	oligosaccharide transport	BIOLOGICAL_PROCESS	0.0280464	1	4	33	5957	AT5G23660
[OVER]	GO:0015770	sucrose transport	BIOLOGICAL_PROCESS	0.0280464	1	4	33	5957	AT5G23660
[OVER]	GO:0015766	disaccharide transport	BIOLOGICAL_PROCESS	0.0280464	1	4	33	5957	AT5G23660
[OVER]	GO:0009962	regulation of flavonoid biosynthetic process	BIOLOGICAL_PROCESS	0.0224989	1	3	33	5958	AT1G75040
[OVER]	GO:0010951	negative regulation of endopeptidase activity	BIOLOGICAL_PROCESS	0.0390499	1	6	33	5955	AT5G12140
[OVER]	GO:0007267	cell-cell signaling	BIOLOGICAL_PROCESS	0.0280464	1	4	33	5957	AT1G72970
[OVER]	GO:0015706	nitrate transport	BIOLOGICAL_PROCESS	0.0169207	1	2	33	5959	AT5G50200
[OVER]	GO:0031056	regulation of histone modification	BIOLOGICAL_PROCESS	0.0390499	1	6	33	5955	AT1G75380
[OVER]	GO:0030234	enzyme regulator activity	MOLECULAR_FUNCTION	3.26e-05	6	106	28	5855	AT5G12140, AT5G62350, AT3G59220, AT5G58590, AT1G07140, AT3G02730
[OVER]	GO:0098772	molecular function regulator	MOLECULAR_FUNCTION	6.35e-05	6	120	28	5841	AT5G12140, AT5G62350, AT3G59220, AT5G58590, AT1G07140, AT3G02730
[OVER]	GO:0004857	enzyme inhibitor activity	MOLECULAR_FUNCTION	9.97e-05	4	40	30	5921	AT5G12140, AT5G62350, AT3G59220, AT3G02730
[OVER]	GO:0008047	enzyme activator activity	MOLECULAR_FUNCTION	0.00122791	3	35	31	5926	AT5G58590, AT1G07140, AT3G02730
[OVER]	GO:0030414	peptidase inhibitor activity	MOLECULAR_FUNCTION	0.00234193	2	11	32	5950	AT5G12140, AT3G59220
[OVER]	GO:0004197	cysteine-type endopeptidase activity	MOLECULAR_FUNCTION	0.00234193	2	11	32	5950	AT4G35350, AT1G20850
[OVER]	GO:0061134	peptidase regulator activity	MOLECULAR_FUNCTION	0.00234193	2	11	32	5950	AT5G12140, AT3G59220
[OVER]	GO:0008536	Ran GTPase binding	MOLECULAR_FUNCTION	0.00612868	2	19	32	5942	AT5G58590, AT1G07140
[OVER]	GO:0005096	GTPase activator activity	MOLECULAR_FUNCTION	0.00733146	2	21	32	5940	AT5G58590, AT1G07140
[OVER]	GO:0030695	GTPase regulator activity	MOLECULAR_FUNCTION	0.00863208	2	23	32	5938	AT5G58590, AT1G07140
[OVER]	GO:0060589	nucleoside-triphosphatase regulator activity	MOLECULAR_FUNCTION	0.0122971	2	28	32	5933	AT5G58590, AT1G07140
[OVER]	GO:0051020	GTPase binding	MOLECULAR_FUNCTION	0.0212857	2	38	32	5923	AT5G58590, AT1G07140
[OVER]	GO:0008234	cysteine-type peptidase activity	MOLECULAR_FUNCTION	0.0193201	2	36	32	5925	AT4G35350, AT1G20850
[OVER]	GO:0017016	Ras GTPase binding	MOLECULAR_FUNCTION	0.0107616	2	26	32	5935	AT5G58590, AT1G07140
[OVER]	GO:0031267	small GTPase binding	MOLECULAR_FUNCTION	0.0107616	2	26	32	5935	AT5G58590, AT1G07140
[OVER]	GO:0047974	guanosine deaminase activity	MOLECULAR_FUNCTION	0.00567139	1	0	33	5961	AT5G28050
[OVER]	GO:0090729	toxin activity	MOLECULAR_FUNCTION	0.00567139	1	0	33	5961	AT1G66100
[OVER]	GO:0046593	mandelonitrile lyase activity	MOLECULAR_FUNCTION	0.00567139	1	0	33	5961	AT1G72970
[OVER]	GO:0015112	nitrate transmembrane transporter activity	MOLECULAR_FUNCTION	0.0224989	1	3	33	5958	AT5G50200
[OVER]	GO:0015157	oligosaccharide transmembrane transporter activity	MOLECULAR_FUNCTION	0.0280464	1	4	33	5957	AT5G23660
[OVER]	GO:0015154	disaccharide transmembrane transporter activity	MOLECULAR_FUNCTION	0.0224989	1	3	33	5958	AT5G23660
[OVER]	GO:0004866	endopeptidase inhibitor activity	MOLECULAR_FUNCTION	0.0445062	1	7	33	5954	AT5G12140
[OVER]	GO:0004869	cysteine-type endopeptidase inhibitor activity	MOLECULAR_FUNCTION	0.0280464	1	4	33	5957	AT5G12140
[OVER]	GO:0008515	sucrose transmembrane transporter activity	MOLECULAR_FUNCTION	0.0224989	1	3	33	5958	AT5G23660
[OVER]	GO:0061135	endopeptidase regulator activity	MOLECULAR_FUNCTION	0.0445062	1	7	33	5954	AT5G12140
