# Supplementary material
Source: Preprints.org preprint supplement (doi:10.20944/preprints202107.0372.v1)
Supplement: Supplementary file 19 [file Supplemental Table S9.xlsx]

## Sheet: OVER-D 63.out
Supplemental Table S9
GO enrichment analysis of col4 and hy2 shared response proteins under salt stress.
Tags	GO.ID	GO.Name	GO.Category	P.Value	Nr.Test	Nr.Reference	Non.Annot.Test	Non.Annot.Reference	SeqTest
[OVER]	GO:0042744	hydrogen peroxide catabolic process	BIOLOGICAL_PROCESS	3.14198e-14	12	36	51	5896	AT5G19890, AT5G15180, AT4G30170, AT4G21960, AT2G37130, AT5G64100, AT5G64120, AT5G39580, AT4G37520, AT4G37530, AT5G42180, AT4G36430
[OVER]	GO:0017001	antibiotic catabolic process	BIOLOGICAL_PROCESS	9.01684e-14	12	40	51	5892	AT5G19890, AT5G15180, AT4G30170, AT4G21960, AT2G37130, AT5G64100, AT5G64120, AT5G39580, AT4G37520, AT4G37530, AT5G42180, AT4G36430
[OVER]	GO:0042743	hydrogen peroxide metabolic process	BIOLOGICAL_PROCESS	2.36339e-13	12	44	51	5888	AT5G19890, AT5G15180, AT4G30170, AT4G21960, AT2G37130, AT5G64100, AT5G64120, AT5G39580, AT4G37520, AT4G37530, AT5G42180, AT4G36430
[OVER]	GO:0051187	cofactor catabolic process	BIOLOGICAL_PROCESS	8.71768e-13	12	50	51	5882	AT5G19890, AT5G15180, AT4G30170, AT4G21960, AT2G37130, AT5G64100, AT5G64120, AT5G39580, AT4G37520, AT4G37530, AT5G42180, AT4G36430
[OVER]	GO:0042737	drug catabolic process	BIOLOGICAL_PROCESS	1.6962e-12	14	90	49	5842	AT5G19890, AT5G15180, AT4G21960, AT2G37130, AT5G64100, AT5G64120, AT5G42180, AT2G43590, AT4G30170, AT2G43620, AT5G39580, AT4G37520, AT4G37530, AT4G36430
[OVER]	GO:0004601	peroxidase activity	MOLECULAR_FUNCTION	5.72654e-12	12	60	51	5872	AT5G19890, AT5G15180, AT4G30170, AT4G21960, AT2G37130, AT5G64100, AT5G64120, AT5G39580, AT4G37520, AT4G37530, AT5G42180, AT4G36430
[OVER]	GO:0016684	oxidoreductase activity, acting on peroxide as acceptor	MOLECULAR_FUNCTION	8.05044e-12	12	62	51	5870	AT5G19890, AT5G15180, AT4G30170, AT4G21960, AT2G37130, AT5G64100, AT5G64120, AT5G39580, AT4G37520, AT4G37530, AT5G42180, AT4G36430
[OVER]	GO:0098869	cellular oxidant detoxification	BIOLOGICAL_PROCESS	1.31641e-11	12	65	51	5867	AT5G19890, AT5G15180, AT4G30170, AT4G21960, AT2G37130, AT5G64100, AT5G64120, AT5G39580, AT4G37520, AT4G37530, AT5G42180, AT4G36430
[OVER]	GO:1990748	cellular detoxification	BIOLOGICAL_PROCESS	1.54343e-11	12	66	51	5866	AT5G19890, AT5G15180, AT4G30170, AT4G21960, AT2G37130, AT5G64100, AT5G64120, AT5G39580, AT4G37520, AT4G37530, AT5G42180, AT4G36430
[OVER]	GO:0016999	antibiotic metabolic process	BIOLOGICAL_PROCESS	1.80544e-11	12	67	51	5865	AT5G19890, AT5G15180, AT4G30170, AT4G21960, AT2G37130, AT5G64100, AT5G64120, AT5G39580, AT4G37520, AT4G37530, AT5G42180, AT4G36430
[OVER]	GO:0097237	cellular response to toxic substance	BIOLOGICAL_PROCESS	2.10722e-11	12	68	51	5864	AT5G19890, AT5G15180, AT4G30170, AT4G21960, AT2G37130, AT5G64100, AT5G64120, AT5G39580, AT4G37520, AT4G37530, AT5G42180, AT4G36430
[OVER]	GO:0072593	reactive oxygen species metabolic process	BIOLOGICAL_PROCESS	3.30759e-11	12	71	51	5861	AT5G19890, AT5G15180, AT4G30170, AT4G21960, AT2G37130, AT5G64100, AT5G64120, AT5G39580, AT4G37520, AT4G37530, AT5G42180, AT4G36430
[OVER]	GO:0016209	antioxidant activity	MOLECULAR_FUNCTION	6.74002e-11	12	76	51	5856	AT5G19890, AT5G15180, AT4G30170, AT4G21960, AT2G37130, AT5G64100, AT5G64120, AT5G39580, AT4G37520, AT4G37530, AT5G42180, AT4G36430
[OVER]	GO:0020037	heme binding	MOLECULAR_FUNCTION	1.15341e-10	12	80	51	5852	AT5G19890, AT5G15180, AT4G30170, AT4G21960, AT2G37130, AT5G64100, AT5G64120, AT5G39580, AT4G37520, AT4G37530, AT5G42180, AT4G36430
[OVER]	GO:0098754	detoxification	BIOLOGICAL_PROCESS	1.9235e-10	12	84	51	5848	AT5G19890, AT5G15180, AT4G30170, AT4G21960, AT2G37130, AT5G64100, AT5G64120, AT5G39580, AT4G37520, AT4G37530, AT5G42180, AT4G36430
[OVER]	GO:0009636	response to toxic substance	BIOLOGICAL_PROCESS	1.35384e-09	13	127	50	5805	AT5G19890, AT5G15180, AT4G21960, AT2G37130, AT5G64100, AT5G64120, AT5G42180, AT4G30170, AT1G73260, AT5G39580, AT4G37520, AT4G37530, AT4G36430
[OVER]	GO:0046906	tetrapyrrole binding	MOLECULAR_FUNCTION	1.9959e-09	12	105	51	5827	AT5G19890, AT5G15180, AT4G30170, AT4G21960, AT2G37130, AT5G64100, AT5G64120, AT5G39580, AT4G37520, AT4G37530, AT5G42180, AT4G36430
[OVER]	GO:0071554	cell wall organization or biogenesis	BIOLOGICAL_PROCESS	9.78658e-09	14	183	49	5749	AT5G15180, AT4G03210, AT4G21960, AT5G64120, AT2G38530, AT2G38540, AT5G49360, AT5G42180, AT5G08000, AT5G57560, AT2G43590, AT2G43620, AT5G39580, AT4G30270
[OVER]	GO:0006979	response to oxidative stress	BIOLOGICAL_PROCESS	5.06646e-08	14	210	49	5722	AT5G19890, AT5G15180, AT4G21960, AT2G37130, AT5G64100, AT5G64120, AT5G42180, AT4G30170, AT1G73260, AT5G39580, AT4G37520, AT4G37530, AT3G30775, AT4G36430
[OVER]	GO:0009056	catabolic process	BIOLOGICAL_PROCESS	1.07311e-07	22	592	41	5340	AT5G19890, AT5G15180, AT3G18490, AT4G21960, AT2G37130, AT5G64100, AT1G29670, AT5G64120, AT5G60360, AT5G49360, AT5G42180, AT2G43590, AT4G30170, AT3G16370, AT2G43620, AT5G03610, AT5G39580, AT2G04570, AT4G37520, AT4G37530, AT3G30775, AT4G36430
[OVER]	GO:0071555	cell wall organization	BIOLOGICAL_PROCESS	3.83812e-07	11	141	52	5791	AT5G15180, AT5G08000, AT5G57560, AT4G03210, AT4G21960, AT5G64120, AT5G39580, AT4G30270, AT2G38530, AT2G38540, AT5G42180
[OVER]	GO:0045229	external encapsulating structure organization	BIOLOGICAL_PROCESS	4.99291e-07	11	145	52	5787	AT5G15180, AT5G08000, AT5G57560, AT4G03210, AT4G21960, AT5G64120, AT5G39580, AT4G30270, AT2G38530, AT2G38540, AT5G42180
[OVER]	GO:0050896	response to stimulus	BIOLOGICAL_PROCESS	5.27645e-07	40	1928	23	4004	AT5G19890, AT3G22060, AT4G21960, AT5G64100, AT5G64120, AT5G60360, AT4G25260, AT1G28280, AT1G75800, AT2G38530, AT2G38310, AT4G12880, AT5G57560, AT4G30170, AT2G02850, AT2G43620, AT1G73260, AT4G30270, AT4G12480, AT4G37520, AT3G12610, AT4G36430, AT5G15180, AT2G37710, AT5G48540, AT3G18490, AT2G37130, AT5G25260, AT1G66180, AT5G42180, AT1G23130, AT5G08000, AT5G38930, AT2G43590, AT3G28040, AT5G39580, AT1…
[OVER]	GO:0017144	drug metabolic process	BIOLOGICAL_PROCESS	5.92144e-07	14	259	49	5673	AT5G19890, AT5G15180, AT4G21960, AT2G37130, AT5G64100, AT5G64120, AT5G42180, AT2G43590, AT4G30170, AT2G43620, AT5G39580, AT4G37520, AT4G37530, AT4G36430
[OVER]	GO:0009664	plant-type cell wall organization	BIOLOGICAL_PROCESS	7.05301e-07	7	43	56	5889	AT5G15180, AT5G57560, AT4G21960, AT5G64120, AT5G39580, AT4G30270, AT5G42180
[OVER]	GO:0070887	cellular response to chemical stimulus	BIOLOGICAL_PROCESS	1.28969e-06	15	321	48	5611	AT5G19890, AT5G15180, AT4G21960, AT2G37130, AT5G64100, AT5G25260, AT5G64120, AT2G38310, AT5G42180, AT4G30170, AT5G39580, AT4G30270, AT4G37520, AT4G37530, AT4G36430
[OVER]	GO:0048511	rhythmic process	BIOLOGICAL_PROCESS	2.24427e-06	6	32	57	5900	AT4G21960, AT2G37130, AT5G64120, AT5G39580, AT4G37520, AT4G37530
[OVER]	GO:0042221	response to chemical	BIOLOGICAL_PROCESS	5.30942e-06	27	1073	36	4859	AT5G19890, AT3G22060, AT4G21960, AT5G64100, AT5G64120, AT5G60360, AT2G38530, AT2G38310, AT5G57560, AT4G30170, AT1G73260, AT4G30270, AT4G12480, AT4G37520, AT3G12610, AT4G36430, AT5G15180, AT3G18490, AT2G37130, AT5G25260, AT1G66180, AT5G42180, AT5G39580, AT1G08930, AT4G37530, AT3G30775, AT4G12470
[OVER]	GO:0044248	cellular catabolic process	BIOLOGICAL_PROCESS	8.25631e-06	17	478	46	5454	AT5G19890, AT5G15180, AT4G21960, AT2G37130, AT5G64100, AT5G64120, AT5G60360, AT5G49360, AT5G42180, AT2G43590, AT4G30170, AT2G43620, AT5G39580, AT4G37520, AT4G37530, AT3G30775, AT4G36430
[OVER]	GO:0006950	response to stress	BIOLOGICAL_PROCESS	9.03918e-06	28	1174	35	4758	AT5G19890, AT4G21960, AT5G64100, AT5G64120, AT1G28280, AT2G38530, AT5G57560, AT4G30170, AT2G43620, AT1G73260, AT4G12480, AT4G37520, AT3G12610, AT4G36430, AT5G15180, AT3G18490, AT2G37130, AT5G25260, AT5G42180, AT1G23130, AT5G08000, AT5G38930, AT2G43590, AT5G39580, AT1G08930, AT4G37530, AT3G30775, AT4G12470
[OVER]	GO:0071669	plant-type cell wall organization or biogenesis	BIOLOGICAL_PROCESS	1.04317e-05	7	67	56	5865	AT5G15180, AT5G57560, AT4G21960, AT5G64120, AT5G39580, AT4G30270, AT5G42180
[OVER]	GO:0044036	cell wall macromolecule metabolic process	BIOLOGICAL_PROCESS	1.31635e-05	6	45	57	5887	AT5G57560, AT2G43590, AT2G43620, AT4G03210, AT4G30270, AT5G49360
[OVER]	GO:0051186	cofactor metabolic process	BIOLOGICAL_PROCESS	2.67588e-05	12	268	51	5664	AT5G19890, AT5G15180, AT4G30170, AT4G21960, AT2G37130, AT5G64100, AT5G64120, AT5G39580, AT4G37520, AT4G37530, AT5G42180, AT4G36430
[OVER]	GO:0006869	lipid transport	BIOLOGICAL_PROCESS	6.11085e-05	5	36	58	5896	AT4G22470, AT4G12480, AT2G38530, AT2G38540, AT4G12470
[OVER]	GO:0044092	negative regulation of molecular function	BIOLOGICAL_PROCESS	6.11085e-05	5	36	58	5896	AT4G25260, AT1G17860, AT1G73260, AT1G28280, AT2G38310
[OVER]	GO:0016491	oxidoreductase activity	MOLECULAR_FUNCTION	6.70761e-05	19	685	44	5247	AT5G19890, AT5G15180, AT4G21960, AT2G37130, AT5G64100, AT5G64120, AT1G30720, AT5G42180, AT4G12880, AT4G30170, AT3G16370, AT2G02850, AT3G28040, AT5G39580, AT4G37520, AT4G37530, AT2G27660, AT3G30775, AT4G36430
[OVER]	GO:0010876	lipid localization	BIOLOGICAL_PROCESS	0.000107355	5	41	58	5891	AT4G22470, AT4G12480, AT2G38530, AT2G38540, AT4G12470
[OVER]	GO:0051716	cellular response to stimulus	BIOLOGICAL_PROCESS	0.000120889	19	716	44	5216	AT5G19890, AT5G15180, AT2G37710, AT4G21960, AT2G37130, AT5G64100, AT5G25260, AT5G64120, AT2G38310, AT5G42180, AT4G30170, AT3G28040, AT5G39580, AT4G30270, AT4G37520, AT3G12610, AT4G37530, AT4G36430, AT4G12470
[OVER]	GO:0004190	aspartic-type endopeptidase activity	MOLECULAR_FUNCTION	0.000139225	4	22	59	5910	AT5G19120, AT3G18490, AT4G16563, AT1G66180
[OVER]	GO:0070001	aspartic-type peptidase activity	MOLECULAR_FUNCTION	0.000139225	4	22	59	5910	AT5G19120, AT3G18490, AT4G16563, AT1G66180
[OVER]	GO:0010410	hemicellulose metabolic process	BIOLOGICAL_PROCESS	0.000139225	4	22	59	5910	AT5G57560, AT4G03210, AT4G30270, AT5G49360
[OVER]	GO:0016762	xyloglucan:xyloglucosyl transferase activity	MOLECULAR_FUNCTION	0.000227465	3	9	60	5923	AT4G30270, AT5G57560, AT4G03210
[OVER]	GO:0045730	respiratory burst	BIOLOGICAL_PROCESS	0.000323885	2	1	61	5931	AT5G39580, AT5G64120
[OVER]	GO:0043086	negative regulation of catalytic activity	BIOLOGICAL_PROCESS	0.000564074	4	33	59	5899	AT4G25260, AT1G17860, AT1G73260, AT2G38310
[OVER]	GO:0004175	endopeptidase activity	MOLECULAR_FUNCTION	0.000579645	7	132	56	5800	AT5G19120, AT3G14240, AT3G18490, AT5G60360, AT4G16563, AT1G66180, AT4G30020
[OVER]	GO:0010383	cell wall polysaccharide metabolic process	BIOLOGICAL_PROCESS	0.000625502	4	34	59	5898	AT5G57560, AT4G03210, AT4G30270, AT5G49360
[OVER]	GO:0010411	xyloglucan metabolic process	BIOLOGICAL_PROCESS	0.000677172	3	14	60	5918	AT4G30270, AT5G57560, AT4G03210
[OVER]	GO:0055114	oxidation-reduction process	BIOLOGICAL_PROCESS	0.000732802	18	757	45	5175	AT5G19890, AT5G15180, AT4G21960, AT2G37130, AT5G64100, AT5G64120, AT1G30720, AT5G42180, AT4G30170, AT3G16370, AT2G02850, AT3G28040, AT5G39580, AT4G37520, AT4G37530, AT2G27660, AT3G30775, AT4G36430
[OVER]	GO:0004553	hydrolase activity, hydrolyzing O-glycosyl compounds	MOLECULAR_FUNCTION	0.000809878	7	140	56	5792	AT5G08000, AT5G57560, AT2G43590, AT4G03210, AT2G43620, AT4G30270, AT5G49360
[OVER]	GO:0008289	lipid binding	MOLECULAR_FUNCTION	0.000966923	6	104	57	5828	AT4G22470, AT4G12480, AT2G38530, AT2G38310, AT2G38540, AT4G12470
[OVER]	GO:0004857	enzyme inhibitor activity	MOLECULAR_FUNCTION	0.00109742	4	40	59	5892	AT4G25260, AT1G17860, AT1G73260, AT2G38310
[OVER]	GO:0016998	cell wall macromolecule catabolic process	BIOLOGICAL_PROCESS	0.00111002	3	17	60	5915	AT2G43590, AT2G43620, AT5G49360
[OVER]	GO:0016798	hydrolase activity, acting on glycosyl bonds	MOLECULAR_FUNCTION	0.00114988	7	149	56	5783	AT5G08000, AT5G57560, AT2G43590, AT4G03210, AT2G43620, AT4G30270, AT5G49360
[OVER]	GO:0048037	cofactor binding	MOLECULAR_FUNCTION	0.00119769	13	467	50	5465	AT5G19890, AT5G15180, AT4G21960, AT2G37130, AT5G64100, AT5G64120, AT1G30720, AT5G42180, AT4G30170, AT5G39580, AT4G37520, AT4G37530, AT4G36430
[OVER]	GO:0009607	response to biotic stimulus	BIOLOGICAL_PROCESS	0.00122532	12	409	51	5523	AT1G23130, AT2G43590, AT3G18490, AT2G37130, AT5G64120, AT1G73260, AT5G39580, AT4G12480, AT1G75800, AT3G30775, AT4G36430, AT4G12470
[OVER]	GO:0006952	defense response	BIOLOGICAL_PROCESS	0.00179276	12	428	51	5504	AT1G23130, AT2G43590, AT3G18490, AT2G37130, AT5G64120, AT2G43620, AT1G73260, AT1G28280, AT5G39580, AT4G12480, AT3G30775, AT4G12470
[OVER]	GO:0008233	peptidase activity	MOLECULAR_FUNCTION	0.00190832	9	262	54	5670	AT5G19120, AT4G22470, AT3G14240, AT3G18490, AT5G60360, AT1G17860, AT4G16563, AT1G66180, AT4G30020
[OVER]	GO:0052548	regulation of endopeptidase activity	BIOLOGICAL_PROCESS	0.00220639	2	5	61	5927	AT1G73260, AT1G17860
[OVER]	GO:0052547	regulation of peptidase activity	BIOLOGICAL_PROCESS	0.00220639	2	5	61	5927	AT1G73260, AT1G17860
[OVER]	GO:0010466	negative regulation of peptidase activity	BIOLOGICAL_PROCESS	0.00220639	2	5	61	5927	AT1G73260, AT1G17860
[OVER]	GO:0045861	negative regulation of proteolysis	BIOLOGICAL_PROCESS	0.00220639	2	5	61	5927	AT1G73260, AT1G17860
[OVER]	GO:0010951	negative regulation of endopeptidase activity	BIOLOGICAL_PROCESS	0.00220639	2	5	61	5927	AT1G73260, AT1G17860
[OVER]	GO:0009605	response to external stimulus	BIOLOGICAL_PROCESS	0.00264867	13	511	50	5421	AT3G18490, AT2G37130, AT5G64120, AT1G75800, AT1G66180, AT5G57560, AT2G43590, AT1G73260, AT5G39580, AT4G12480, AT3G30775, AT4G36430, AT4G12470
[OVER]	GO:0001101	response to acid chemical	BIOLOGICAL_PROCESS	0.00261496	11	388	52	5544	AT3G22060, AT3G18490, AT1G73260, AT4G30270, AT4G12480, AT2G38530, AT1G08930, AT1G66180, AT2G38310, AT3G30775, AT4G12470
[OVER]	GO:0009628	response to abiotic stimulus	BIOLOGICAL_PROCESS	0.00283216	17	782	46	5150	AT5G48540, AT3G18490, AT5G25260, AT4G25260, AT2G38530, AT1G66180, AT5G08000, AT5G57560, AT5G38930, AT1G73260, AT4G12480, AT1G08930, AT4G37520, AT3G12610, AT4G37530, AT3G30775, AT4G12470
[OVER]	GO:0004866	endopeptidase inhibitor activity	MOLECULAR_FUNCTION	0.00292196	2	6	61	5926	AT1G73260, AT1G17860
[OVER]	GO:0061135	endopeptidase regulator activity	MOLECULAR_FUNCTION	0.00292196	2	6	61	5926	AT1G73260, AT1G17860
[OVER]	GO:0043207	response to external biotic stimulus	BIOLOGICAL_PROCESS	0.00305376	11	396	52	5536	AT2G43590, AT3G18490, AT2G37130, AT5G64120, AT1G73260, AT5G39580, AT4G12480, AT1G75800, AT3G30775, AT4G36430, AT4G12470
[OVER]	GO:0051707	response to other organism	BIOLOGICAL_PROCESS	0.00305376	11	396	52	5536	AT2G43590, AT3G18490, AT2G37130, AT5G64120, AT1G73260, AT5G39580, AT4G12480, AT1G75800, AT3G30775, AT4G36430, AT4G12470
[OVER]	GO:0006508	proteolysis	BIOLOGICAL_PROCESS	0.00335576	10	342	53	5590	AT5G19120, AT4G22470, AT3G14240, AT3G18490, AT5G60360, AT1G17860, AT1G73260, AT4G16563, AT1G66180, AT4G30020
[OVER]	GO:0051346	negative regulation of hydrolase activity	BIOLOGICAL_PROCESS	0.00373143	2	7	61	5925	AT1G73260, AT1G17860
[OVER]	GO:0033993	response to lipid	BIOLOGICAL_PROCESS	0.00383575	8	237	55	5695	AT5G57560, AT3G22060, AT3G18490, AT4G30270, AT4G12480, AT1G08930, AT2G38310, AT4G12470
[OVER]	GO:0009682	induced systemic resistance	BIOLOGICAL_PROCESS	0.0046328	2	8	61	5924	AT4G12480, AT4G12470
[OVER]	GO:1901072	glucosamine-containing compound catabolic process	BIOLOGICAL_PROCESS	0.00562411	2	9	61	5923	AT2G43590, AT2G43620
[OVER]	GO:1901071	glucosamine-containing compound metabolic process	BIOLOGICAL_PROCESS	0.00562411	2	9	61	5923	AT2G43590, AT2G43620
[OVER]	GO:0030162	regulation of proteolysis	BIOLOGICAL_PROCESS	0.00562411	2	9	61	5923	AT1G73260, AT1G17860
[OVER]	GO:0008061	chitin binding	MOLECULAR_FUNCTION	0.00562411	2	9	61	5923	AT2G43590, AT2G43620
[OVER]	GO:0046348	amino sugar catabolic process	BIOLOGICAL_PROCESS	0.00562411	2	9	61	5923	AT2G43590, AT2G43620
[OVER]	GO:0009620	response to fungus	BIOLOGICAL_PROCESS	0.00513224	6	147	57	5785	AT2G37130, AT2G43590, AT5G64120, AT5G39580, AT4G12480, AT4G12470
[OVER]	GO:0006026	aminoglycan catabolic process	BIOLOGICAL_PROCESS	0.00562411	2	9	61	5923	AT2G43590, AT2G43620
[OVER]	GO:0006032	chitin catabolic process	BIOLOGICAL_PROCESS	0.00562411	2	9	61	5923	AT2G43590, AT2G43620
[OVER]	GO:0006030	chitin metabolic process	BIOLOGICAL_PROCESS	0.00562411	2	9	61	5923	AT2G43590, AT2G43620
[OVER]	GO:1901700	response to oxygen-containing compound	BIOLOGICAL_PROCESS	0.00604765	12	498	51	5434	AT5G57560, AT3G22060, AT3G18490, AT1G73260, AT4G30270, AT4G12480, AT2G38530, AT1G08930, AT1G66180, AT2G38310, AT3G30775, AT4G12470
[OVER]	GO:0005976	polysaccharide metabolic process	BIOLOGICAL_PROCESS	0.00618041	6	153	57	5779	AT5G57560, AT2G43590, AT2G43620, AT4G03210, AT4G30270, AT5G49360
[OVER]	GO:0016042	lipid catabolic process	BIOLOGICAL_PROCESS	0.00668148	4	68	59	5864	AT1G29670, AT3G16370, AT5G03610, AT2G04570
[OVER]	GO:0004568	chitinase activity	MOLECULAR_FUNCTION	0.00670344	2	10	61	5922	AT2G43590, AT2G43620
[OVER]	GO:0050832	defense response to fungus	BIOLOGICAL_PROCESS	0.00690486	5	110	58	5822	AT2G37130, AT5G64120, AT5G39580, AT4G12480, AT4G12470
[OVER]	GO:0030414	peptidase inhibitor activity	MOLECULAR_FUNCTION	0.00786889	2	11	61	5921	AT1G73260, AT1G17860
[OVER]	GO:0061134	peptidase regulator activity	MOLECULAR_FUNCTION	0.00786889	2	11	61	5921	AT1G73260, AT1G17860
[OVER]	GO:0051704	multi-organism process	BIOLOGICAL_PROCESS	0.00841608	12	520	51	5412	AT2G43590, AT2G02850, AT3G18490, AT2G37130, AT5G64120, AT1G73260, AT5G39580, AT4G12480, AT1G75800, AT3G30775, AT4G36430, AT4G12470
[OVER]	GO:0006040	amino sugar metabolic process	BIOLOGICAL_PROCESS	0.00911858	2	12	61	5920	AT2G43590, AT2G43620
[OVER]	GO:0006649	phospholipid transfer to membrane	BIOLOGICAL_PROCESS	0.0105088	1	0	62	5932	AT2G38530
[OVER]	GO:0010324	membrane invagination	BIOLOGICAL_PROCESS	0.0105088	1	0	62	5932	AT5G25260
[OVER]	GO:0004657	proline dehydrogenase activity	MOLECULAR_FUNCTION	0.0105088	1	0	62	5932	AT3G30775
[OVER]	GO:0006022	aminoglycan metabolic process	BIOLOGICAL_PROCESS	0.0104507	2	13	61	5919	AT2G43590, AT2G43620
[OVER]	GO:0051336	regulation of hydrolase activity	BIOLOGICAL_PROCESS	0.0107831	3	41	60	5891	AT1G73260, AT2G38310, AT1G17860
[OVER]	GO:0065009	regulation of molecular function	BIOLOGICAL_PROCESS	0.0110728	5	124	58	5808	AT4G25260, AT1G17860, AT1G73260, AT1G28280, AT2G38310
[OVER]	GO:0016787	hydrolase activity	MOLECULAR_FUNCTION	0.0111811	20	1126	43	4806	AT5G19120, AT4G22470, AT4G03210, AT3G18490, AT1G29670, AT5G60360, AT1G17860, AT1G66180, AT5G49360, AT5G08000, AT5G57560, AT2G43590, AT3G16370, AT3G14240, AT2G43620, AT5G03610, AT4G30270, AT4G16563, AT2G04570, AT4G30020
[OVER]	GO:0070011	peptidase activity, acting on L-amino acid peptides	MOLECULAR_FUNCTION	0.0113376	7	229	56	5703	AT5G19120, AT3G14240, AT3G18490, AT5G60360, AT4G16563, AT1G66180, AT4G30020
[OVER]	GO:0050790	regulation of catalytic activity	BIOLOGICAL_PROCESS	0.0367888	4	116	59	5816	AT4G25260, AT1G17860, AT1G73260, AT2G38310
[OVER]	GO:0047134	protein-disulfide reductase activity	MOLECULAR_FUNCTION	0.0312013	1	2	62	5930	AT2G27660
[OVER]	GO:0098772	molecular function regulator	MOLECULAR_FUNCTION	0.0428059	4	122	59	5810	AT4G25260, AT1G17860, AT1G73260, AT2G38310
[OVER]	GO:0030234	enzyme regulator activity	MOLECULAR_FUNCTION	0.0295823	4	108	59	5824	AT4G25260, AT1G17860, AT1G73260, AT2G38310
[OVER]	GO:0001872	(1->3)-beta-D-glucan binding	MOLECULAR_FUNCTION	0.0209088	1	1	62	5931	AT5G08000
[OVER]	GO:0012501	programmed cell death	BIOLOGICAL_PROCESS	0.0280983	3	60	60	5872	AT1G73260, AT2G38530, AT4G12470
[OVER]	GO:0036294	cellular response to decreased oxygen levels	BIOLOGICAL_PROCESS	0.0413872	1	3	62	5929	AT5G25260
[OVER]	GO:0098542	defense response to other organism	BIOLOGICAL_PROCESS	0.0168022	8	308	55	5624	AT3G18490, AT2G37130, AT5G64120, AT1G73260, AT5G39580, AT4G12480, AT3G30775, AT4G12470
[OVER]	GO:0000272	polysaccharide catabolic process	BIOLOGICAL_PROCESS	0.0178437	3	50	60	5882	AT2G43590, AT2G43620, AT5G49360
[OVER]	GO:0006562	proline catabolic process	BIOLOGICAL_PROCESS	0.0209088	1	1	62	5931	AT3G30775
[OVER]	GO:0006537	glutamate biosynthetic process	BIOLOGICAL_PROCESS	0.0413872	1	3	62	5929	AT3G30775
[OVER]	GO:0097305	response to alcohol	BIOLOGICAL_PROCESS	0.0226825	6	205	57	5727	AT3G18490, AT3G22060, AT4G12480, AT1G08930, AT2G38310, AT4G12470
[OVER]	GO:0043433	negative regulation of DNA-binding transcription factor activity	BIOLOGICAL_PROCESS	0.0209088	1	1	62	5931	AT1G28280
[OVER]	GO:0042546	cell wall biogenesis	BIOLOGICAL_PROCESS	0.0292642	3	61	60	5871	AT4G30270, AT5G57560, AT4G03210
[OVER]	GO:0006970	response to osmotic stress	BIOLOGICAL_PROCESS	0.0373262	7	294	56	5638	AT5G38930, AT1G73260, AT4G12480, AT1G08930, AT4G37520, AT4G37530, AT4G12470
[OVER]	GO:0006968	cellular defense response	BIOLOGICAL_PROCESS	0.0413872	1	3	62	5929	AT1G28280
[OVER]	GO:0010133	proline catabolic process to glutamate	BIOLOGICAL_PROCESS	0.0209088	1	1	62	5931	AT3G30775
[OVER]	GO:0010185	regulation of cellular defense response	BIOLOGICAL_PROCESS	0.0312013	1	2	62	5930	AT1G28280
[OVER]	GO:0051245	negative regulation of cellular defense response	BIOLOGICAL_PROCESS	0.0312013	1	2	62	5930	AT1G28280
[OVER]	GO:0051248	negative regulation of protein metabolic process	BIOLOGICAL_PROCESS	0.0258576	2	22	61	5910	AT1G73260, AT1G17860
[OVER]	GO:0009741	response to brassinosteroid	BIOLOGICAL_PROCESS	0.0391519	2	28	61	5904	AT4G30270, AT5G57560
[OVER]	GO:0009737	response to abscisic acid	BIOLOGICAL_PROCESS	0.0213034	6	202	57	5730	AT3G18490, AT3G22060, AT4G12480, AT1G08930, AT2G38310, AT4G12470
[OVER]	GO:0009651	response to salt stress	BIOLOGICAL_PROCESS	0.0270167	7	274	56	5658	AT5G38930, AT1G73260, AT4G12480, AT1G08930, AT4G37520, AT4G37530, AT4G12470
[OVER]	GO:0009650	UV protection	BIOLOGICAL_PROCESS	0.0209088	1	1	62	5931	AT3G12610
[OVER]	GO:0052689	carboxylic ester hydrolase activity	MOLECULAR_FUNCTION	0.0166928	4	90	59	5842	AT1G29670, AT3G16370, AT5G03610, AT2G04570
[OVER]	GO:0007169	transmembrane receptor protein tyrosine kinase signaling pathway	BIOLOGICAL_PROCESS	0.0279185	2	23	61	5909	AT3G28040, AT2G37710
[OVER]	GO:0007166	cell surface receptor signaling pathway	BIOLOGICAL_PROCESS	0.0491656	2	32	61	5900	AT3G28040, AT2G37710
[OVER]	GO:0007167	enzyme linked receptor protein signaling pathway	BIOLOGICAL_PROCESS	0.0300433	2	24	61	5908	AT3G28040, AT2G37710
[OVER]	GO:0071453	cellular response to oxygen levels	BIOLOGICAL_PROCESS	0.0413872	1	3	62	5929	AT5G25260
[OVER]	GO:0071456	cellular response to hypoxia	BIOLOGICAL_PROCESS	0.0209088	1	1	62	5931	AT5G25260
[OVER]	GO:0010427	abscisic acid binding	MOLECULAR_FUNCTION	0.0413872	1	3	62	5929	AT2G38310
[OVER]	GO:0009414	response to water deprivation	BIOLOGICAL_PROCESS	0.0493502	4	128	59	5804	AT3G18490, AT2G38530, AT1G08930, AT3G30775
[OVER]	GO:0009627	systemic acquired resistance	BIOLOGICAL_PROCESS	0.0322306	2	25	61	5907	AT3G18490, AT4G12470
[OVER]	GO:0009641	shade avoidance	BIOLOGICAL_PROCESS	0.0413872	1	3	62	5929	AT4G25260
[OVER]	GO:0051090	regulation of DNA-binding transcription factor activity	BIOLOGICAL_PROCESS	0.0209088	1	1	62	5931	AT1G28280
[OVER]	GO:0046527	glucosyltransferase activity	MOLECULAR_FUNCTION	0.040894	3	70	60	5862	AT4G30270, AT5G57560, AT4G03210
[OVER]	GO:0033273	response to vitamin	BIOLOGICAL_PROCESS	0.0312013	1	2	62	5930	AT1G66180
[OVER]	GO:0050321	tau-protein kinase activity	MOLECULAR_FUNCTION	0.0209088	1	1	62	5931	AT3G28040
[OVER]	GO:0015914	phospholipid transport	BIOLOGICAL_PROCESS	0.0413872	1	3	62	5929	AT2G38530
[OVER]	GO:0031222	arabinan catabolic process	BIOLOGICAL_PROCESS	0.0312013	1	2	62	5930	AT5G49360
[OVER]	GO:0031221	arabinan metabolic process	BIOLOGICAL_PROCESS	0.0312013	1	2	62	5930	AT5G49360
[OVER]	GO:0032269	negative regulation of cellular protein metabolic process	BIOLOGICAL_PROCESS	0.0258576	2	22	61	5910	AT1G73260, AT1G17860
[OVER]	GO:0033591	response to L-ascorbic acid	BIOLOGICAL_PROCESS	0.0209088	1	1	62	5931	AT1G66180
[OVER]	GO:0044264	cellular polysaccharide metabolic process	BIOLOGICAL_PROCESS	0.032176	4	111	59	5821	AT5G57560, AT4G03210, AT4G30270, AT5G49360
[OVER]	GO:0052886	9,9'-dicis-carotene:quinone oxidoreductase activity	MOLECULAR_FUNCTION	0.0312013	1	2	62	5930	AT3G16370
[OVER]	GO:0052889	9,9'-di-cis-zeta-carotene desaturation to 7,9,7',9'-tetra-cis-lycopene	BIOLOGICAL_PROCESS	0.0312013	1	2	62	5930	AT3G16370
[OVER]	GO:0052887	7,9,9'-tricis-neurosporene:quinone oxidoreductase activity	MOLECULAR_FUNCTION	0.0312013	1	2	62	5930	AT3G16370
[OVER]	GO:0003842	1-pyrroline-5-carboxylate dehydrogenase activity	MOLECULAR_FUNCTION	0.0209088	1	1	62	5931	AT3G30775
