# Supplementary material
Source: Preprints.org preprint supplement (doi:10.20944/preprints202107.0372.v1)
Supplement: Supplementary file 21 [file supplymental file.docx]

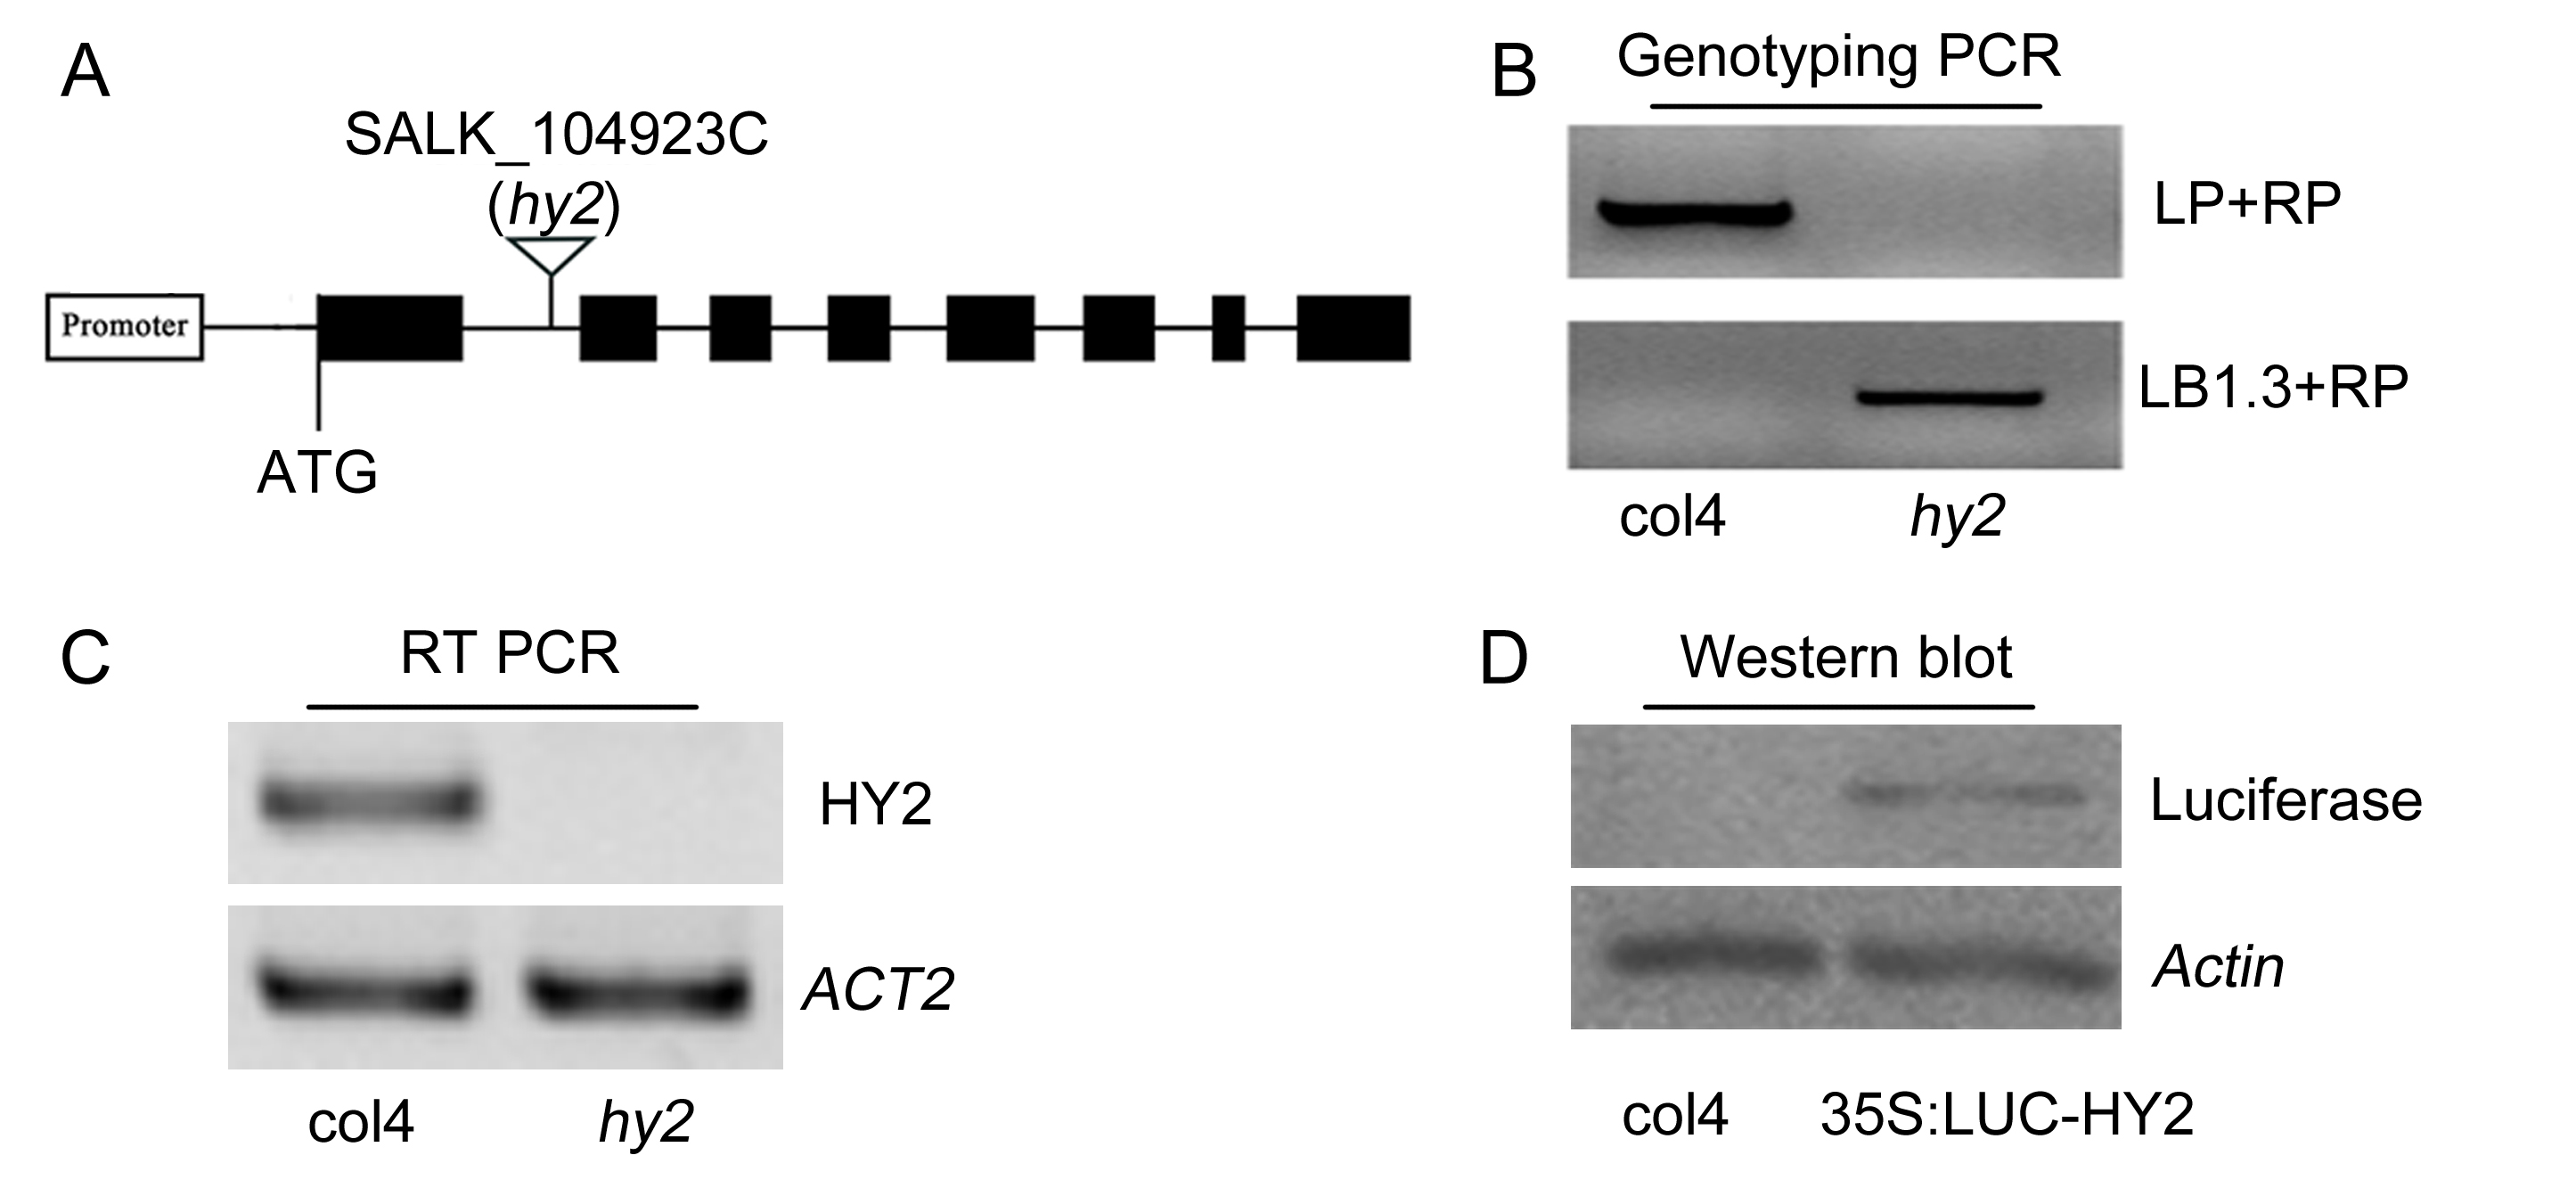


**Figure S1. Identification of *LUC-HY2* overexpressing line and *hy2* mutant. (A)** Structure diagram of *hy2*(SALK_104923C). **(B)** Genotyping PCR of col4 and *hy2* mutant using specific primers. **(C)** RT-PCR of col4 and *hy2* mutant using specific primers. *ACT2* was used as an [internal](javascript:;) [reference](javascript:;). **(D)** Western blot of col4 and *LUC-HY2* overexpressing line. *Actin* was used as a loading control.


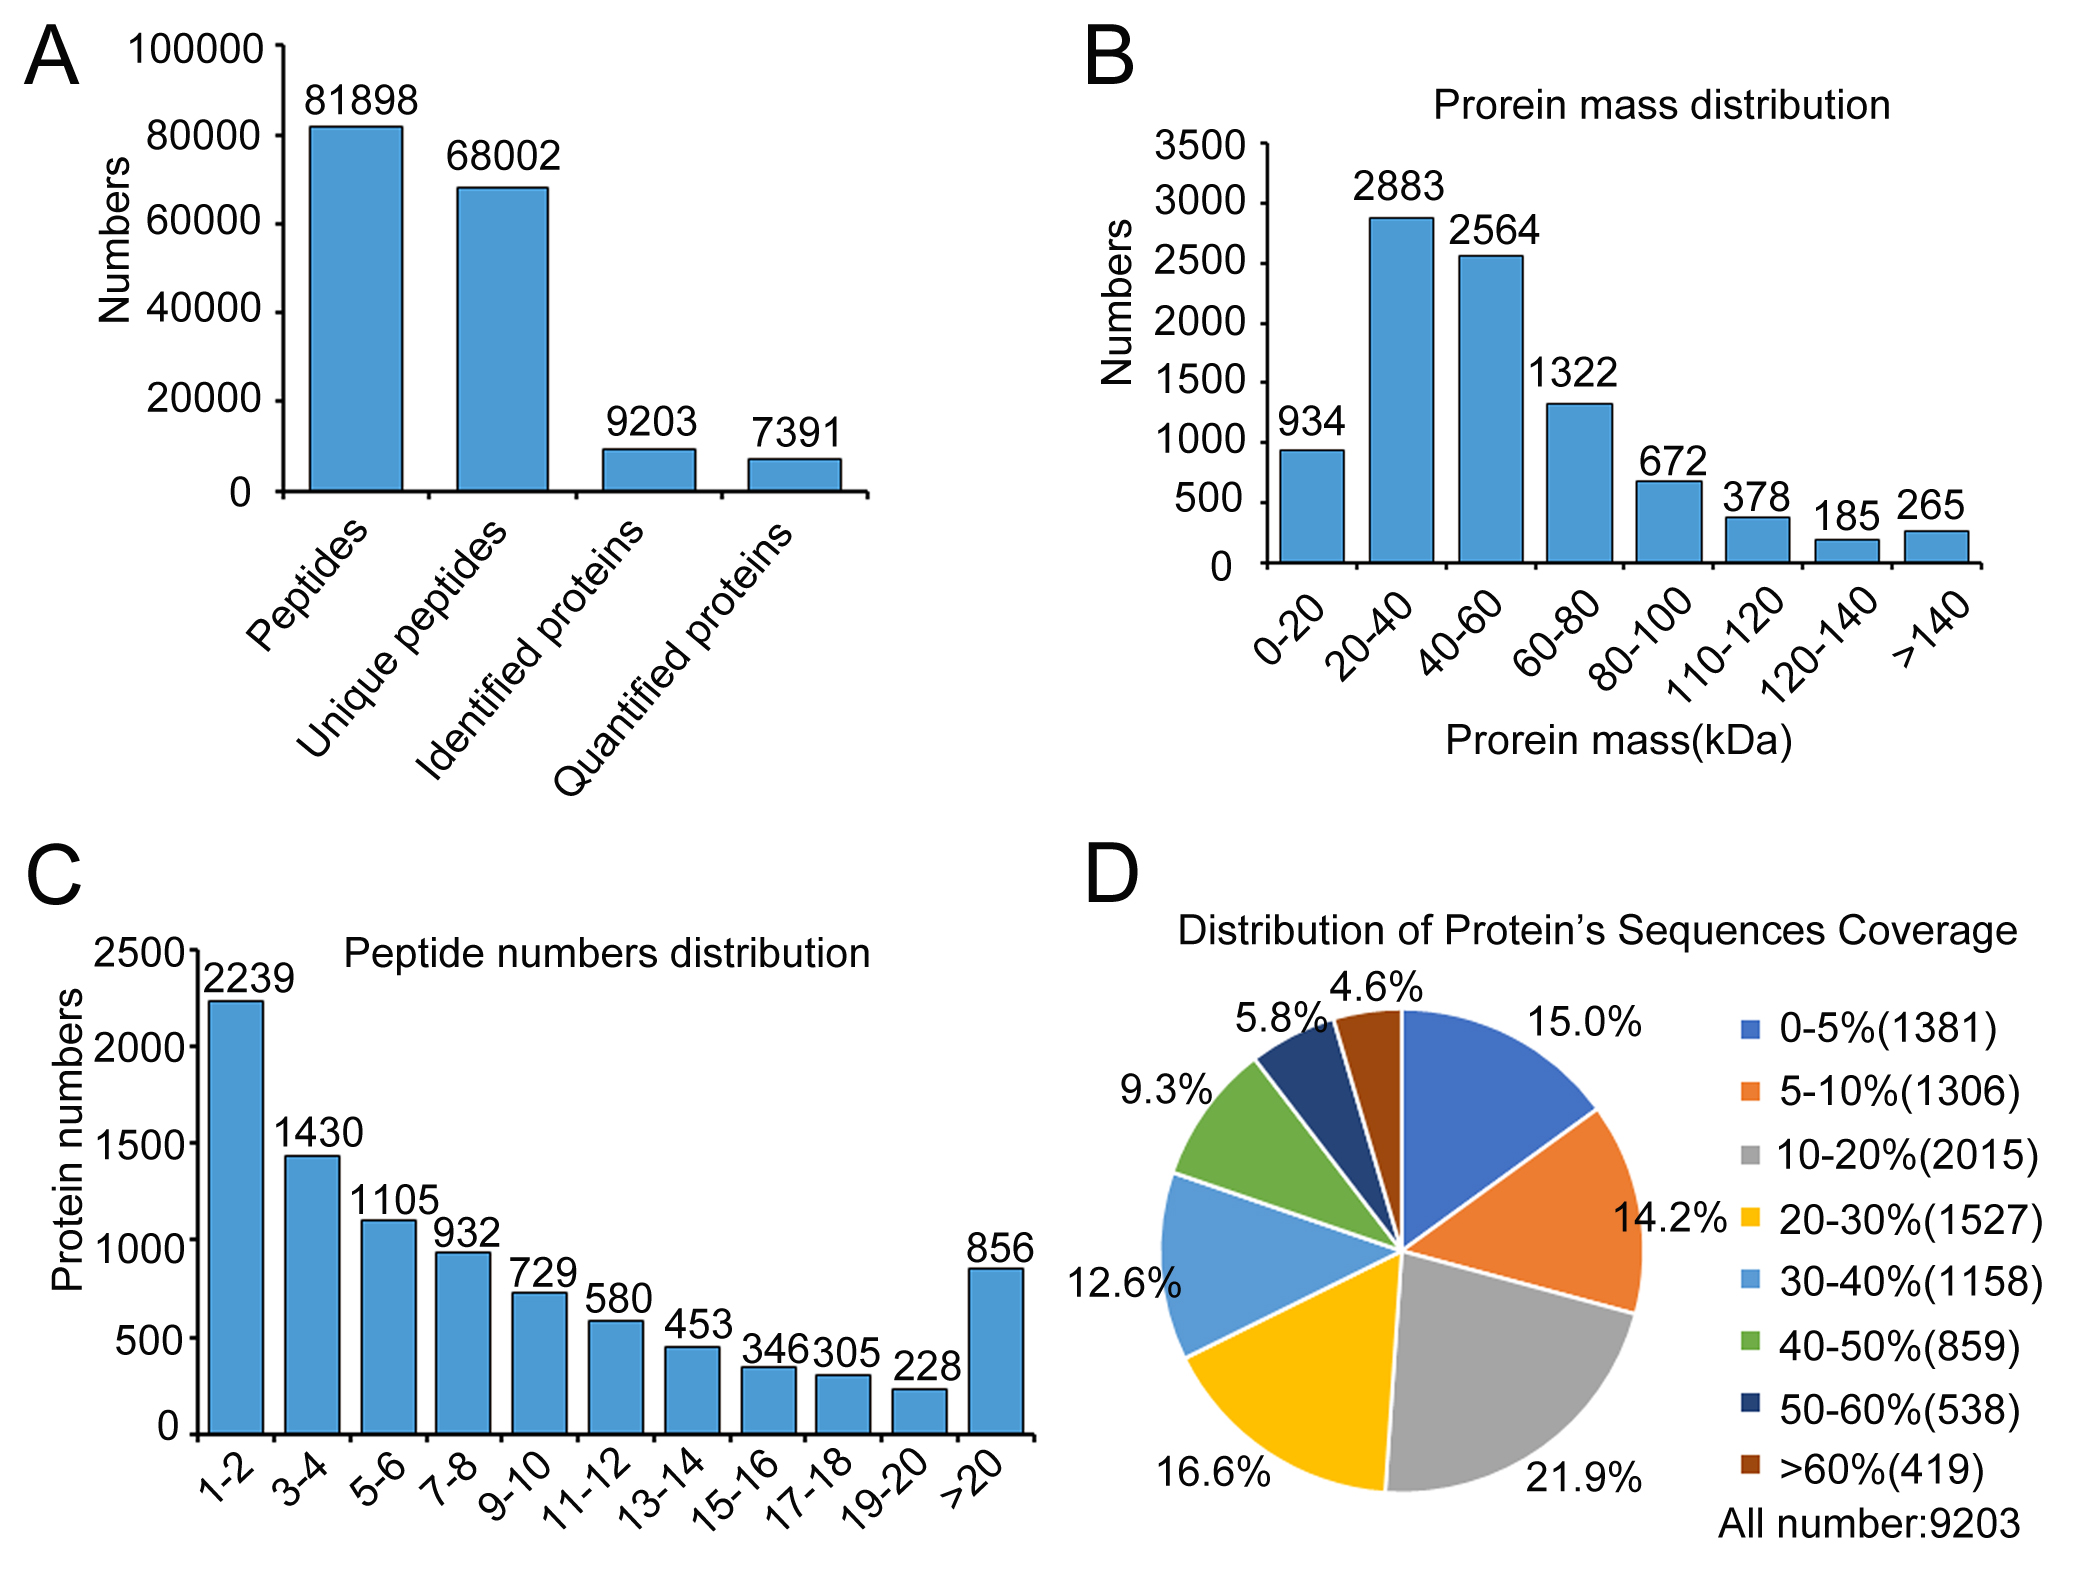


**Figure S2.** **Display of the main data of proteomics. (A)** The number of peptides and proteins identified in proteomics by searching *Arabidopsis* Araport11. **(B)** The size distribution of the identified proteins. **(C)** The proportional distribution of the number of identified peptides. **(D)** The distribution of protein sequence coverage.


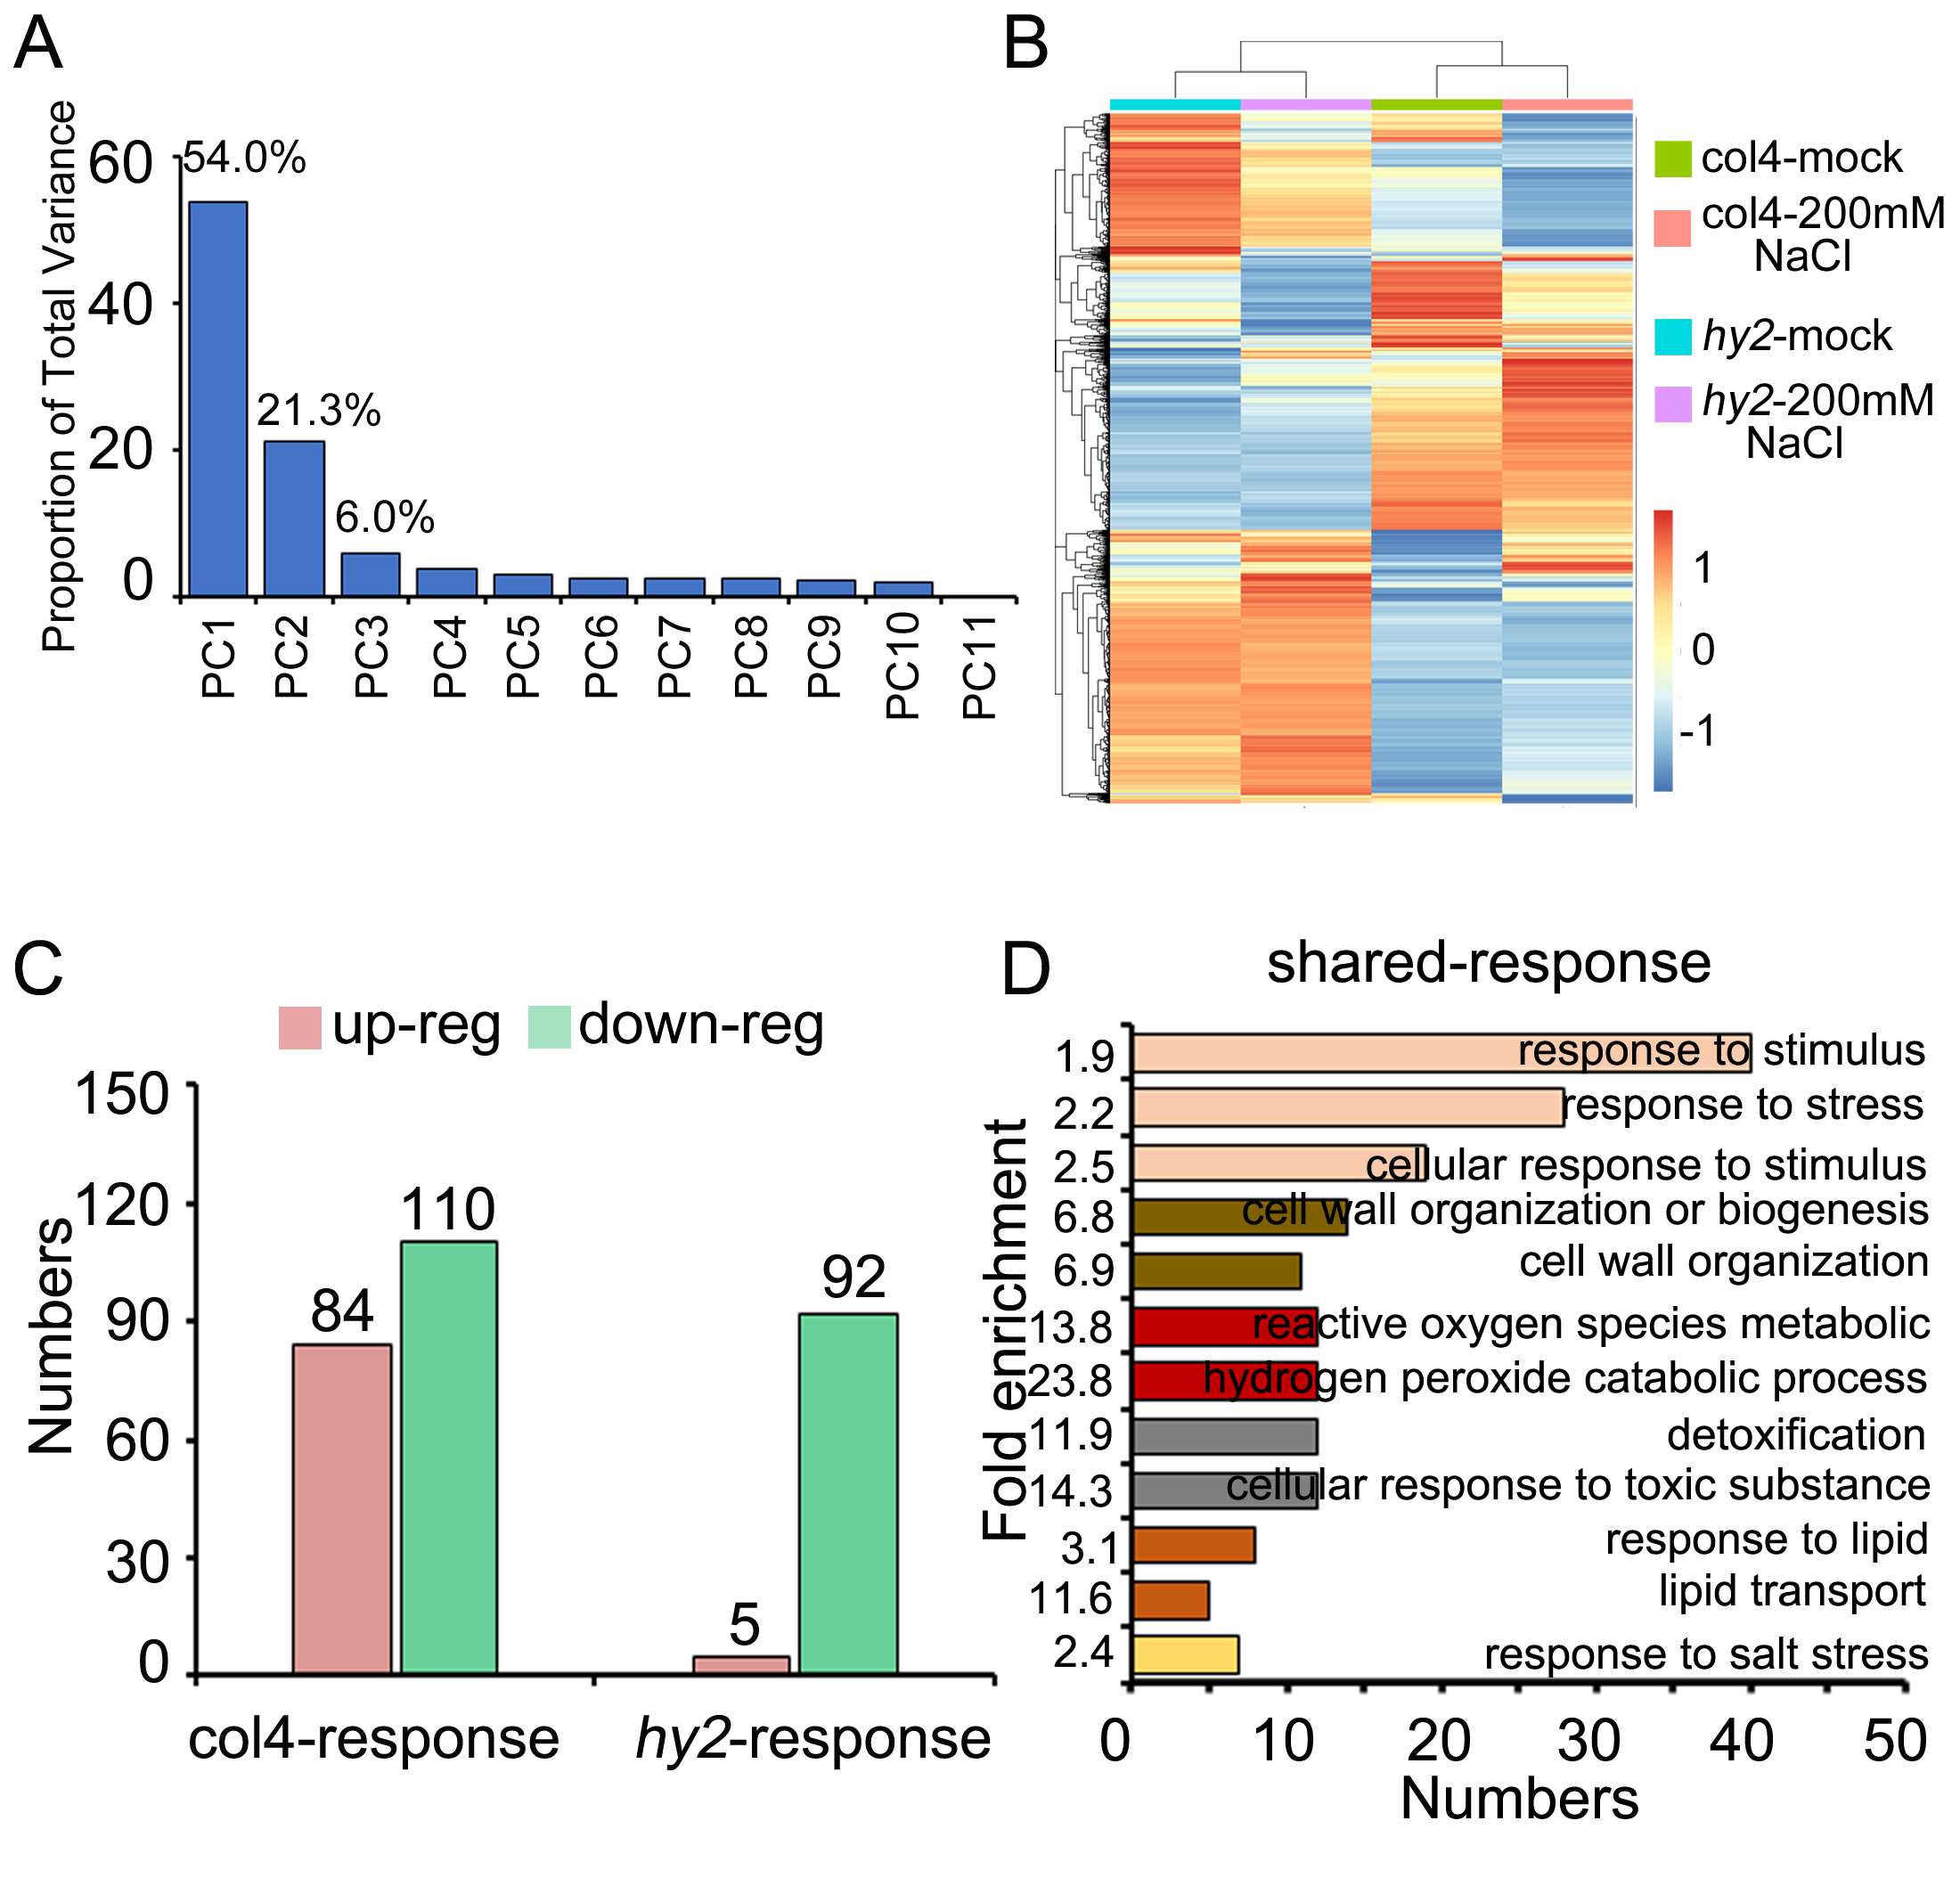


**Figure S3. Quantitative proteomics analysis. (A)** The proportion of the total variance of each principal component. **(B)** Overall expression level of col4 and *hy2* mutant under salt stress. **(C)** The number of responsive proteins from col4 and *hy2* mutant under salt stress. The red and green squares represent up-regulated and down-regulated proteins, respectively. **(D)** The GO enrichment analysis of col4 and *hy2* mutantshared response proteins under salt stress.

Supplemental Table S1: Basic profiles of proteomics data.

Supplemental Table S2: The data of col4 and *hy2* shared quantified proteins under salt stress.

Supplemental Table S3: The response proteins of col4 under salt stress.

Supplemental Table S4: The response proteins of *hy2* mutant under salt stress.

Supplemental Table S5: GO enrichment analysis of col4 specific quantified and response proteins under salt stress.

Supplemental Table S6: GO enrichment analysis of *hy2* specific quantified and response proteins under salt stress.

Supplemental Table S7: GO enrichment analysis of col4 specific response proteins under salt stress.

Supplemental Table S8: GO enrichment analysis of *hy2* specific response proteins under salt stress.

Supplemental Table S9: GO enrichment analysis of col4 and *hy2* shared response proteins under salt stress.

Supplemental Table S10: Primer sequences.
